# Supplementary material for: Prediction of Human Intestinal Absorption by GA Feature Selection and Support Vector Machine Regression
Source: MDPI journal article supplement (doi:10.3390/ijms9101961), 2008-10-20
Supplement: s1 [file s1]

Molecule-001-Arbekacin
  Cerius2 10300711153D 1   1.00000                          
Structure written by Cerius2 SD Exporter
 82 84  0  0  0  0  0  0  0  0999 V2000
   -3.2177    2.9705   -1.7839 C   0  0  0  0  0  0
    4.0331   -3.9589    0.4290 C   0  0  0  0  0  0
    3.8189   -5.0164    0.2515 H   0  0  0  0  0  0
    4.3367   -3.8551    1.4755 H   0  0  0  0  0  0
    0.0201    1.3769   -2.2771 C   0  0  0  0  0  0
    0.2612    2.3018   -2.8106 H   0  0  0  0  0  0
   -0.2750    0.6290   -3.0203 H   0  0  0  0  0  0
    5.2221   -3.5117   -0.4573 C   0  0  0  0  0  0
    6.1090   -4.1049   -0.2177 H   0  0  0  0  0  0
    4.9625   -3.7081   -1.5016 H   0  0  0  0  0  0
   -5.1679    2.2044   -3.2199 C   0  0  0  0  0  0
   -5.6109    1.7262   -2.3443 H   0  0  0  0  0  0
   -4.5608    1.4596   -3.7415 H   0  0  0  0  0  0
   -1.1640    1.6433   -1.3087 C   0  0  0  0  0  0
   -0.8686    2.4605   -0.6390 H   0  0  0  0  0  0
    1.2850    0.8801   -1.5309 C   0  0  0  0  0  0
    1.6382    1.6732   -0.8640 H   0  0  0  0  0  0
   -5.8425   -0.9596    0.6897 C   0  0  0  0  0  0
   -6.7849   -0.7100    0.1925 H   0  0  0  0  0  0
    2.7517   -3.1084    0.1608 C   0  0  0  0  0  0
    2.1758   -3.5868   -0.6365 H   0  0  0  0  0  0
   -4.2635    3.3820   -2.7574 C   0  0  0  0  0  0
   -4.8995    4.1365   -2.2842 H   0  0  0  0  0  0
   -6.0428   -0.7873    2.2267 C   0  0  0  0  0  0
   -6.6704   -1.5986    2.6065 H   0  0  0  0  0  0
   -4.7377   -0.0035    0.1561 C   0  0  0  0  0  0
   -4.5265   -0.2355   -0.8906 H   0  0  0  0  0  0
   -0.2235   -0.1769    0.2728 C   0  0  0  0  0  0
    0.0709    0.5196    1.0647 H   0  0  0  0  0  0
    5.5179   -1.9908   -0.2401 C   0  0  0  0  0  0
    6.2540   -1.9107    0.5660 H   0  0  0  0  0  0
    0.9898   -0.3913   -0.6792 C   0  0  0  0  0  0
    0.7462   -1.2285   -1.3443 H   0  0  0  0  0  0
   -1.4913    0.3901   -0.4407 C   0  0  0  0  0  0
   -1.8977   -0.3792   -1.1076 H   0  0  0  0  0  0
   -4.6976   -0.7337    3.0239 C   0  0  0  0  0  0
   -4.9141   -0.2405    3.9764 H   0  0  0  0  0  0
   -6.3206    2.6473   -4.1539 C   0  0  0  0  0  0
   -6.9484    3.3863   -3.6506 H   0  0  0  0  0  0
   -5.9202    3.0919   -5.0677 H   0  0  0  0  0  0
    6.1402   -1.3133   -1.4904 C   0  0  0  0  0  0
    7.0680   -1.8194   -1.7653 H   0  0  0  0  0  0
    5.4507   -1.3712   -2.3347 H   0  0  0  0  0  0
   -4.1319   -2.1283    3.4147 C   0  0  0  0  0  0
   -4.8714   -2.6813    3.9972 H   0  0  0  0  0  0
   -3.8841   -2.7201    2.5351 H   0  0  0  0  0  0
    3.0911   -1.6526   -0.3073 C   0  0  0  0  0  0
    3.1568   -1.6282   -1.4003 H   0  0  0  0  0  0
   -3.4369   -0.1683    0.9901 C   0  0  0  0  0  0
   -3.0510   -1.1866    0.8943 H   0  0  0  0  0  0
   -2.2901    2.0389   -2.1126 N   0  0  0  0  0  0
   -2.3913    1.6073   -2.9743 H   0  0  0  0  0  0
   -7.1595    1.4988   -4.5165 N   0  0  0  0  0  0
   -7.8957    1.8459   -5.1367 H   0  0  0  0  0  0
   -6.5825    0.8630   -5.0719 H   0  0  0  0  0  0
    6.4402    0.1011   -1.2331 N   0  0  0  0  0  0
    6.7281    0.5165   -2.1214 H   0  0  0  0  0  0
    5.5565    0.5469   -0.9691 H   0  0  0  0  0  0
    2.3505    0.6351   -2.5166 N   0  0  0  0  0  0
    1.9861   -0.0191   -3.2127 H   0  0  0  0  0  0
    2.5185    1.5194   -3.0013 H   0  0  0  0  0  0
   -5.5609   -2.3642    0.3337 N   0  0  0  0  0  0
   -5.6242   -2.4417   -0.6845 H   0  0  0  0  0  0
   -4.5950   -2.5762    0.5854 H   0  0  0  0  0  0
    1.8997   -3.1269    1.3650 N   0  0  0  0  0  0
    1.7709   -4.1045    1.6344 H   0  0  0  0  0  0
    2.4287   -2.6757    2.1154 H   0  0  0  0  0  0
   -2.9602   -1.9948    4.2144 O   0  0  0  0  0  0
   -2.3304   -1.4768    3.6653 H   0  0  0  0  0  0
   -3.6536    4.0059   -3.8901 O   0  0  0  0  0  0
   -3.1052    3.3127   -4.3130 H   0  0  0  0  0  0
   -6.7729    0.4198    2.4611 O   0  0  0  0  0  0
   -6.2836    1.0899    1.9416 H   0  0  0  0  0  0
   -5.2056    1.3508    0.2226 O   0  0  0  0  0  0
   -4.4268    1.9085    0.0210 H   0  0  0  0  0  0
   -0.5504   -1.4279    0.8863 O   0  0  0  0  0  0
    0.3039   -1.8167    1.1614 H   0  0  0  0  0  0
   -3.2075    3.4913   -0.6439 O   0  0  0  0  0  0
    2.1340   -0.6789    0.1620 O   0  0  0  0  0  0
   -3.7026    0.1046    2.3810 O   0  0  0  0  0  0
    4.3666   -1.2384    0.2230 O   0  0  0  0  0  0
   -2.4518    0.7972    0.5662 O   0  0  0  0  0  0
  1 22  1  0  0  0
  1 51  1  0  0  0
  1 78  2  0  0  0
  2  3  1  0  0  0
  2  4  1  0  0  0
  2  8  1  0  0  0
  2 20  1  0  0  0
  5  6  1  0  0  0
  5  7  1  0  0  0
  5 14  1  0  0  0
  5 16  1  0  0  0
  8  9  1  0  0  0
  8 10  1  0  0  0
  8 30  1  0  0  0
 11 12  1  0  0  0
 11 13  1  0  0  0
 11 22  1  0  0  0
 11 38  1  0  0  0
 14 15  1  0  0  0
 14 34  1  0  0  0
 14 51  1  0  0  0
 16 17  1  0  0  0
 16 32  1  0  0  0
 16 59  1  0  0  0
 18 19  1  0  0  0
 18 24  1  0  0  0
 18 26  1  0  0  0
 18 62  1  0  0  0
 20 21  1  0  0  0
 20 47  1  0  0  0
 20 65  1  0  0  0
 22 23  1  0  0  0
 22 70  1  0  0  0
 24 25  1  0  0  0
 24 36  1  0  0  0
 24 72  1  0  0  0
 26 27  1  0  0  0
 26 49  1  0  0  0
 26 74  1  0  0  0
 28 29  1  0  0  0
 28 32  1  0  0  0
 28 34  1  0  0  0
 28 76  1  0  0  0
 30 31  1  0  0  0
 30 41  1  0  0  0
 30 81  1  0  0  0
 32 33  1  0  0  0
 32 79  1  0  0  0
 34 35  1  0  0  0
 34 82  1  0  0  0
 36 37  1  0  0  0
 36 44  1  0  0  0
 36 80  1  0  0  0
 38 39  1  0  0  0
 38 40  1  0  0  0
 38 53  1  0  0  0
 41 42  1  0  0  0
 41 43  1  0  0  0
 41 56  1  0  0  0
 44 45  1  0  0  0
 44 46  1  0  0  0
 44 68  1  0  0  0
 47 48  1  0  0  0
 47 79  1  0  0  0
 47 81  1  0  0  0
 49 50  1  0  0  0
 49 80  1  0  0  0
 49 82  1  0  0  0
 51 52  1  0  0  0
 53 54  1  0  0  0
 53 55  1  0  0  0
 56 57  1  0  0  0
 56 58  1  0  0  0
 59 60  1  0  0  0
 59 61  1  0  0  0
 62 63  1  0  0  0
 62 64  1  0  0  0
 65 66  1  0  0  0
 65 67  1  0  0  0
 68 69  1  0  0  0
 70 71  1  0  0  0
 72 73  1  0  0  0
 74 75  1  0  0  0
 76 77  1  0  0  0
M  END
$$$$
Molecule-002-Azlocillin
  Cerius2 10300711153D 1   1.00000                          
Structure written by Cerius2 SD Exporter
 55 58  0  0  0  0  0  0  0  0999 V2000
   -4.4343   -4.4306    0.7076 C   0  0  0  0  0  0
   -5.0611   -5.2277    0.8416 H   0  0  0  0  0  0
   -3.6220   -4.3577   -0.4367 C   0  0  0  0  0  0
   -3.6581   -5.1034   -1.1359 H   0  0  0  0  0  0
   -4.3845   -3.4048    1.6667 C   0  0  0  0  0  0
   -4.9759   -3.4558    2.4997 H   0  0  0  0  0  0
   -2.7602   -3.2598   -0.6207 C   0  0  0  0  0  0
   -2.1803   -3.2346   -1.4630 H   0  0  0  0  0  0
   -3.5223   -2.3079    1.4810 C   0  0  0  0  0  0
   -3.5074   -1.5737    2.1931 H   0  0  0  0  0  0
   -2.6918   -2.2133    0.3346 C   0  0  0  0  0  0
   -0.6488   -1.0181    1.1057 C   0  0  0  0  0  0
    2.5503    0.3939    1.2891 C   0  0  0  0  0  0
    5.9902   -0.1841    0.4990 C   0  0  0  0  0  0
   -3.9845    2.6440    0.6059 C   0  0  0  0  0  0
   -2.3189    1.2974   -0.5418 C   0  0  0  0  0  0
    3.3730    0.2033   -2.3328 C   0  0  0  0  0  0
    3.0091   -0.3680   -3.1904 H   0  0  0  0  0  0
    2.5054    0.6018   -1.8014 H   0  0  0  0  0  0
    3.9546    1.0471   -2.7108 H   0  0  0  0  0  0
    5.4346   -1.2720   -2.2206 C   0  0  0  0  0  0
    6.0949   -0.4718   -2.5613 H   0  0  0  0  0  0
    6.0193   -1.9730   -1.6216 H   0  0  0  0  0  0
    5.0703   -1.8097   -3.0992 H   0  0  0  0  0  0
    4.2502   -0.6860   -1.3930 C   0  0  0  0  0  0
   -1.7743   -1.0463    0.1315 C   0  0  0  0  0  0
   -1.3382   -1.1272   -0.8701 H   0  0  0  0  0  0
    1.8016   -0.8534    1.4686 C   0  0  0  0  0  0
    1.6620   -1.0804    2.5295 H   0  0  0  0  0  0
    4.6655    0.1239   -0.1040 C   0  0  0  0  0  0
    4.6498    1.2033   -0.2833 H   0  0  0  0  0  0
   -3.8419    4.6514   -0.4770 C   0  0  0  0  0  0
   -3.3341    5.5193   -0.0486 H   0  0  0  0  0  0
   -4.5848    4.9770   -1.2091 H   0  0  0  0  0  0
   -2.8434    3.6423   -1.0848 C   0  0  0  0  0  0
   -3.0640    3.4701   -2.1428 H   0  0  0  0  0  0
   -1.8173    4.0098   -0.9844 H   0  0  0  0  0  0
    3.0740   -1.5328    0.8596 C   0  0  0  0  0  0
    3.6511   -2.1471    1.5576 H   0  0  0  0  0  0
    0.6254   -0.9415    0.6542 N   0  0  0  0  0  0
    0.7551   -0.9191   -0.3069 H   0  0  0  0  0  0
   -4.4543    3.8904    0.5375 N   0  0  0  0  0  0
   -5.1461    4.2268    1.1272 H   0  0  0  0  0  0
   -2.4998    0.1916    0.2189 N   0  0  0  0  0  0
   -3.1652    0.2705    0.9137 H   0  0  0  0  0  0
    3.5839   -0.2352    0.7336 N   0  0  0  0  0  0
   -3.0283    2.4405   -0.3254 N   0  0  0  0  0  0
    7.1241    0.2409   -0.0985 O   0  0  0  0  0  0
    7.9855    0.0349    0.3197 H   0  0  0  0  0  0
   -0.8793   -1.0157    2.3387 O   0  0  0  0  0  0
    2.2751    1.6025    1.4554 O   0  0  0  0  0  0
    6.1276   -0.8163    1.5709 O   0  0  0  0  0  0
   -4.4288    1.8318    1.4486 O   0  0  0  0  0  0
   -1.4619    1.2751   -1.4577 O   0  0  0  0  0  0
    3.1874   -2.0791   -0.8594 S   0  0  0  0  0  0
  1  2  1  0  0  0
  1  3  2  0  0  0
  1  5  1  0  0  0
  3  4  1  0  0  0
  3  7  1  0  0  0
  5  6  1  0  0  0
  5  9  2  0  0  0
  7  8  1  0  0  0
  7 11  2  0  0  0
  9 10  1  0  0  0
  9 11  1  0  0  0
 11 26  1  0  0  0
 12 26  1  0  0  0
 12 40  1  0  0  0
 12 50  2  0  0  0
 13 28  1  0  0  0
 13 46  1  0  0  0
 13 51  2  0  0  0
 14 30  1  0  0  0
 14 48  1  0  0  0
 14 52  2  0  0  0
 15 42  1  0  0  0
 15 47  1  0  0  0
 15 53  2  0  0  0
 16 44  1  0  0  0
 16 47  1  0  0  0
 16 54  2  0  0  0
 17 18  1  0  0  0
 17 19  1  0  0  0
 17 20  1  0  0  0
 17 25  1  0  0  0
 21 22  1  0  0  0
 21 23  1  0  0  0
 21 24  1  0  0  0
 21 25  1  0  0  0
 25 30  1  0  0  0
 25 55  1  0  0  0
 26 27  1  0  0  0
 26 44  1  0  0  0
 28 29  1  0  0  0
 28 38  1  0  0  0
 28 40  1  0  0  0
 30 31  1  0  0  0
 30 46  1  0  0  0
 32 33  1  0  0  0
 32 34  1  0  0  0
 32 35  1  0  0  0
 32 42  1  0  0  0
 35 36  1  0  0  0
 35 37  1  0  0  0
 35 47  1  0  0  0
 38 39  1  0  0  0
 38 46  1  0  0  0
 38 55  1  0  0  0
 40 41  1  0  0  0
 42 43  1  0  0  0
 44 45  1  0  0  0
 48 49  1  0  0  0
M  END
$$$$
Molecule-003-Cefodizime
  Cerius2 10300711153D 1   1.00000                          
Structure written by Cerius2 SD Exporter
 57 60  0  0  0  0  0  0  0  0999 V2000
   -7.2647   -0.4143   -0.7577 C   0  0  0  0  0  0
    6.8404    0.3202    0.7898 C   0  0  0  0  0  0
   -8.0709    0.6700   -1.1313 C   0  0  0  0  0  0
   -7.7999    1.6480   -1.0658 H   0  0  0  0  0  0
    7.2599   -0.8359    0.1202 C   0  0  0  0  0  0
   -9.1685   -1.3819   -1.4893 C   0  0  0  0  0  0
    4.8770   -0.5636    0.1733 C   0  0  0  0  0  0
    1.0961    0.7934    0.9363 C   0  0  0  0  0  0
    0.3072    1.4988   -0.0298 C   0  0  0  0  0  0
   -5.9478   -0.4216   -0.2230 C   0  0  0  0  0  0
   -5.1765    0.7410    0.0493 C   0  0  0  0  0  0
   -2.1454    2.0202   -0.3586 C   0  0  0  0  0  0
    0.8197    1.9820   -1.2629 C   0  0  0  0  0  0
    9.0685   -1.2052   -1.4782 C   0  0  0  0  0  0
    7.7108    1.3267    1.4248 C   0  0  0  0  0  0
    8.3854    1.7545    0.6813 H   0  0  0  0  0  0
    7.1170    2.1338    1.8584 H   0  0  0  0  0  0
    8.2967    0.8635    2.2202 H   0  0  0  0  0  0
    8.6568   -1.2902   -0.0676 C   0  0  0  0  0  0
    8.7346   -2.3232    0.2774 H   0  0  0  0  0  0
    9.3555   -0.6978    0.5238 H   0  0  0  0  0  0
   -3.0253    1.7606    0.7799 C   0  0  0  0  0  0
   -3.4952    2.6745    1.1542 H   0  0  0  0  0  0
   -1.6909    1.4185    1.5070 C   0  0  0  0  0  0
   -1.4338    2.1409    2.2903 H   0  0  0  0  0  0
    0.4639    0.0530    2.0829 C   0  0  0  0  0  0
    0.9368   -0.9256    2.1893 H   0  0  0  0  0  0
    0.6498    0.6113    3.0032 H   0  0  0  0  0  0
    2.5892    0.7431    0.9168 C   0  0  0  0  0  0
    3.0129    1.6473    0.4788 H   0  0  0  0  0  0
    2.9798    0.6902    1.9365 H   0  0  0  0  0  0
   -3.9703   -3.4247    0.6469 C   0  0  0  0  0  0
   -3.9751   -3.9231   -0.3237 H   0  0  0  0  0  0
   -2.9721   -3.4968    1.0785 H   0  0  0  0  0  0
   -4.6828   -3.9150    1.3123 H   0  0  0  0  0  0
   -3.9223    0.6669    0.5553 N   0  0  0  0  0  0
   -3.5900   -0.2181    0.7387 H   0  0  0  0  0  0
   -7.9426   -1.5566   -0.9847 N   0  0  0  0  0  0
    5.5060    0.4412    0.8013 N   0  0  0  0  0  0
   -5.4638   -1.6732    0.0080 N   0  0  0  0  0  0
   -9.9709   -2.4153   -1.7716 N   0  0  0  0  0  0
   -9.6636   -3.3203   -1.6091 H   0  0  0  0  0  0
  -10.8554   -2.2596   -2.1369 H   0  0  0  0  0  0
   -1.0155    1.6717    0.2815 N   0  0  0  0  0  0
    0.1291    2.8033   -2.0796 O   0  0  0  0  0  0
    0.5341    3.0932   -2.9213 H   0  0  0  0  0  0
    9.3902   -2.3142   -2.1765 O   0  0  0  0  0  0
    9.6635   -2.2222   -3.1125 H   0  0  0  0  0  0
   -5.6172    1.8919   -0.1740 O   0  0  0  0  0  0
   -2.4252    2.3671   -1.5273 O   0  0  0  0  0  0
    1.9487    1.6974   -1.7180 O   0  0  0  0  0  0
    9.1433   -0.1025   -2.0639 O   0  0  0  0  0  0
   -4.3098   -2.0507    0.4898 O   0  0  0  0  0  0
    5.9282   -1.7630   -0.4985 S   0  0  0  0  0  0
   -9.6358    0.2597   -1.7474 S   0  0  0  0  0  0
    3.1513   -0.7214    0.0106 S   0  0  0  0  0  0
   -1.3155   -0.2813    1.9795 S   0  0  0  0  0  0
  1  3  2  0  0  0
  1 10  1  0  0  0
  1 38  1  0  0  0
  2  5  2  0  0  0
  2 15  1  0  0  0
  2 39  1  0  0  0
  3  4  1  0  0  0
  3 55  1  0  0  0
  5 19  1  0  0  0
  5 54  1  0  0  0
  6 38  2  0  0  0
  6 41  1  0  0  0
  6 55  1  0  0  0
  7 39  2  0  0  0
  7 54  1  0  0  0
  7 56  1  0  0  0
  8  9  2  0  0  0
  8 26  1  0  0  0
  8 29  1  0  0  0
  9 13  1  0  0  0
  9 44  1  0  0  0
 10 11  1  0  0  0
 10 40  2  0  0  0
 11 36  1  0  0  0
 11 49  2  0  0  0
 12 22  1  0  0  0
 12 44  1  0  0  0
 12 50  2  0  0  0
 13 45  1  0  0  0
 13 51  2  0  0  0
 14 19  1  0  0  0
 14 47  1  0  0  0
 14 52  2  0  0  0
 15 16  1  0  0  0
 15 17  1  0  0  0
 15 18  1  0  0  0
 19 20  1  0  0  0
 19 21  1  0  0  0
 22 23  1  0  0  0
 22 24  1  0  0  0
 22 36  1  0  0  0
 24 25  1  0  0  0
 24 44  1  0  0  0
 24 57  1  0  0  0
 26 27  1  0  0  0
 26 28  1  0  0  0
 26 57  1  0  0  0
 29 30  1  0  0  0
 29 31  1  0  0  0
 29 56  1  0  0  0
 32 33  1  0  0  0
 32 34  1  0  0  0
 32 35  1  0  0  0
 32 53  1  0  0  0
 36 37  1  0  0  0
 40 53  1  0  0  0
 41 42  1  0  0  0
 41 43  1  0  0  0
 45 46  1  0  0  0
 47 48  1  0  0  0
M  END
$$$$
Molecule-005-Gentamicin_C1a
  Cerius2 10300711153D 1   1.00000                          
Structure written by Cerius2 SD Exporter
 71 73  0  0  0  0  0  0  0  0999 V2000
    4.7045    1.9059   -2.7808 C   0  0  0  0  0  0
    5.2241    2.7620   -2.3464 H   0  0  0  0  0  0
    4.6990    2.0164   -3.8668 H   0  0  0  0  0  0
    3.6716    1.9033   -2.4293 H   0  0  0  0  0  0
   -4.6570   -3.1960    0.8532 C   0  0  0  0  0  0
   -4.3437   -4.1977    0.5504 H   0  0  0  0  0  0
   -3.8331   -2.7446    1.4067 H   0  0  0  0  0  0
   -5.5128   -3.2995    1.5227 H   0  0  0  0  0  0
    5.3543   -2.1893   -0.5649 C   0  0  0  0  0  0
    5.1835   -2.4136   -1.6213 H   0  0  0  0  0  0
    5.8661   -3.0512   -0.1279 H   0  0  0  0  0  0
    0.0323    2.6396    1.2455 C   0  0  0  0  0  0
   -0.6225    2.2011    2.0051 H   0  0  0  0  0  0
    0.2691    3.6526    1.5838 H   0  0  0  0  0  0
    5.4140    0.5881   -2.3924 C   0  0  0  0  0  0
    4.8829   -0.2431   -2.8596 H   0  0  0  0  0  0
    6.4231    0.6100   -2.8133 H   0  0  0  0  0  0
    6.2600   -0.9356   -0.4475 C   0  0  0  0  0  0
    6.5897   -0.8424    0.5913 H   0  0  0  0  0  0
    7.1550   -1.0692   -1.0607 H   0  0  0  0  0  0
   -5.0408   -2.3477   -0.3961 C   0  0  0  0  0  0
   -5.6970   -0.9645   -0.0300 C   0  0  0  0  0  0
   -6.4332   -1.1187    0.7665 H   0  0  0  0  0  0
    1.3290    1.7769    1.1393 C   0  0  0  0  0  0
    1.4787    1.2779    2.1018 H   0  0  0  0  0  0
   -0.7569    2.7055   -0.0884 C   0  0  0  0  0  0
   -1.6449    3.3279    0.0621 H   0  0  0  0  0  0
    3.9874   -1.9780    0.1396 C   0  0  0  0  0  0
    3.3268   -2.8132   -0.1093 H   0  0  0  0  0  0
   -4.6411    0.0534    0.5066 C   0  0  0  0  0  0
   -5.0914    1.0488    0.5640 H   0  0  0  0  0  0
   -0.1375    0.1596   -0.2537 C   0  0  0  0  0  0
   -0.4436   -0.3968    0.6383 H   0  0  0  0  0  0
    5.5128    0.3714   -0.8510 C   0  0  0  0  0  0
    6.1086    1.2033   -0.4624 H   0  0  0  0  0  0
    1.2966    0.6926    0.0104 C   0  0  0  0  0  0
    1.6329    1.1454   -0.9300 H   0  0  0  0  0  0
   -1.2021    1.2774   -0.5443 C   0  0  0  0  0  0
   -1.3960    1.3298   -1.6217 H   0  0  0  0  0  0
   -3.7954   -2.1067   -1.3023 C   0  0  0  0  0  0
   -3.2699   -3.0493   -1.4718 H   0  0  0  0  0  0
   -4.1051   -1.7342   -2.2834 H   0  0  0  0  0  0
    3.3314   -0.6568   -0.3515 C   0  0  0  0  0  0
    3.0574   -0.7760   -1.4054 H   0  0  0  0  0  0
   -3.4091    0.1320   -0.4438 C   0  0  0  0  0  0
   -3.7232    0.5910   -1.3887 H   0  0  0  0  0  0
   -7.8321   -0.5513   -1.3174 C   0  0  0  0  0  0
   -8.0984   -1.6090   -1.3071 H   0  0  0  0  0  0
   -8.3363   -0.0461   -0.4914 H   0  0  0  0  0  0
   -8.1819   -0.1164   -2.2541 H   0  0  0  0  0  0
    2.4947    2.6522    0.9394 N   0  0  0  0  0  0
    2.3001    3.2103    0.1058 H   0  0  0  0  0  0
    3.2629    2.0308    0.6934 H   0  0  0  0  0  0
    0.0529    3.3813   -1.1197 N   0  0  0  0  0  0
   -0.5314    3.4812   -1.9527 H   0  0  0  0  0  0
    0.2423    4.3275   -0.7809 H   0  0  0  0  0  0
    4.1637   -1.9817    1.6030 N   0  0  0  0  0  0
    3.2340   -1.8646    2.0121 H   0  0  0  0  0  0
    4.6892   -1.1370    1.8392 H   0  0  0  0  0  0
   -6.3684   -0.3583   -1.2231 N   0  0  0  0  0  0
   -6.2275    0.6543   -1.1870 H   0  0  0  0  0  0
   -4.2406   -0.2800    1.8412 O   0  0  0  0  0  0
   -5.0437   -0.1856    2.3946 H   0  0  0  0  0  0
   -0.0965   -0.7660   -1.3439 O   0  0  0  0  0  0
   -1.0028   -1.1252   -1.3470 H   0  0  0  0  0  0
   -5.9683   -3.1613   -1.1207 O   0  0  0  0  0  0
   -6.2276   -2.6297   -1.9033 H   0  0  0  0  0  0
    2.1287   -0.4269    0.4088 O   0  0  0  0  0  0
   -2.8666   -1.1844   -0.6963 O   0  0  0  0  0  0
    4.2339    0.4626   -0.1775 O   0  0  0  0  0  0
   -2.4308    0.9968    0.1715 O   0  0  0  0  0  0
  1  2  1  0  0  0
  1  3  1  0  0  0
  1  4  1  0  0  0
  1 15  1  0  0  0
  5  6  1  0  0  0
  5  7  1  0  0  0
  5  8  1  0  0  0
  5 21  1  0  0  0
  9 10  1  0  0  0
  9 11  1  0  0  0
  9 18  1  0  0  0
  9 28  1  0  0  0
 12 13  1  0  0  0
 12 14  1  0  0  0
 12 24  1  0  0  0
 12 26  1  0  0  0
 15 16  1  0  0  0
 15 17  1  0  0  0
 15 34  1  0  0  0
 18 19  1  0  0  0
 18 20  1  0  0  0
 18 34  1  0  0  0
 21 22  1  0  0  0
 21 40  1  0  0  0
 21 66  1  0  0  0
 22 23  1  0  0  0
 22 30  1  0  0  0
 22 60  1  0  0  0
 24 25  1  0  0  0
 24 36  1  0  0  0
 24 51  1  0  0  0
 26 27  1  0  0  0
 26 38  1  0  0  0
 26 54  1  0  0  0
 28 29  1  0  0  0
 28 43  1  0  0  0
 28 57  1  0  0  0
 30 31  1  0  0  0
 30 45  1  0  0  0
 30 62  1  0  0  0
 32 33  1  0  0  0
 32 36  1  0  0  0
 32 38  1  0  0  0
 32 64  1  0  0  0
 34 35  1  0  0  0
 34 70  1  0  0  0
 36 37  1  0  0  0
 36 68  1  0  0  0
 38 39  1  0  0  0
 38 71  1  0  0  0
 40 41  1  0  0  0
 40 42  1  0  0  0
 40 69  1  0  0  0
 43 44  1  0  0  0
 43 68  1  0  0  0
 43 70  1  0  0  0
 45 46  1  0  0  0
 45 69  1  0  0  0
 45 71  1  0  0  0
 47 48  1  0  0  0
 47 49  1  0  0  0
 47 50  1  0  0  0
 47 60  1  0  0  0
 51 52  1  0  0  0
 51 53  1  0  0  0
 54 55  1  0  0  0
 54 56  1  0  0  0
 57 58  1  0  0  0
 57 59  1  0  0  0
 60 61  1  0  0  0
 62 63  1  0  0  0
 64 65  1  0  0  0
 66 67  1  0  0  0
M  END
$$$$
Molecule-006-Lucifer_Yellow_CH
  Cerius2 10300711153D 1   1.00000                          
Structure written by Cerius2 SD Exporter
 42 44  0  0  0  0  0  0  0  0999 V2000
   -0.7039   -0.0770   -0.3764 C   0  0  0  0  0  0
   -2.0288    0.3966   -0.1434 C   0  0  0  0  0  0
   -3.0796   -0.5380   -0.0503 C   0  0  0  0  0  0
   -4.0391   -0.2263    0.1174 H   0  0  0  0  0  0
   -1.5344   -2.3787   -0.4097 C   0  0  0  0  0  0
   -1.3706   -3.3850   -0.4982 H   0  0  0  0  0  0
    0.1128    2.2206   -0.2856 C   0  0  0  0  0  0
    0.8847    2.8910   -0.3240 H   0  0  0  0  0  0
    0.3737    0.8434   -0.4633 C   0  0  0  0  0  0
   -0.4554   -1.4702   -0.5181 C   0  0  0  0  0  0
   -2.2745    1.7830    0.0019 C   0  0  0  0  0  0
   -2.8389   -1.9127   -0.1663 C   0  0  0  0  0  0
   -1.1935    2.6864   -0.0372 C   0  0  0  0  0  0
    1.6769    0.3442   -0.7065 C   0  0  0  0  0  0
    0.8727   -1.8999   -0.7510 C   0  0  0  0  0  0
    4.6811   -1.3999    0.8252 C   0  0  0  0  0  0
    5.1312   -0.1608    0.5381 N   0  0  0  0  0  0
    4.6366    0.3337   -0.1349 H   0  0  0  0  0  0
    3.6891   -1.9656    0.1137 N   0  0  0  0  0  0
    3.3432   -2.8184    0.4214 H   0  0  0  0  0  0
   -3.5267    2.2603    0.1818 N   0  0  0  0  0  0
   -4.2754    1.6642    0.3277 H   0  0  0  0  0  0
   -3.6940    3.2120    0.1441 H   0  0  0  0  0  0
    1.9009   -0.9999   -0.8253 N   0  0  0  0  0  0
    6.1898    0.4227    1.1549 N   0  0  0  0  0  0
    6.5787   -0.2456    1.8267 H   0  0  0  0  0  0
    6.9102    0.5824    0.4458 H   0  0  0  0  0  0
    3.1851   -1.4242   -1.0232 N   0  0  0  0  0  0
    3.1997   -2.1376   -1.7638 H   0  0  0  0  0  0
   -3.8124   -4.5819   -0.3015 O   0  0  0  0  0  0
   -4.6890   -5.0152   -0.2435 H   0  0  0  0  0  0
   -2.7616    4.9370   -0.6451 O   0  0  0  0  0  0
   -2.4866    5.8599   -0.8185 H   0  0  0  0  0  0
    2.6423    1.1416   -0.8053 O   0  0  0  0  0  0
    1.1198   -3.1221   -0.8914 O   0  0  0  0  0  0
    5.1623   -2.0680    1.7674 O   0  0  0  0  0  0
   -5.3852   -2.5460   -0.9133 O   0  0  0  0  0  0
   -4.6791   -2.8998    1.5496 O   0  0  0  0  0  0
   -0.2324    5.2933   -0.0507 O   0  0  0  0  0  0
   -1.8892    4.5507    1.8116 O   0  0  0  0  0  0
   -4.1914   -2.9768    0.0412 S   0  0  0  0  0  0
   -1.4790    4.3696    0.2885 S   0  0  0  0  0  0
  1  2  1  0  0  0
  1  9  2  0  0  0
  1 10  1  0  0  0
  2  3  1  0  0  0
  2 11  2  0  0  0
  3  4  1  0  0  0
  3 12  2  0  0  0
  5  6  1  0  0  0
  5 10  2  0  0  0
  5 12  1  0  0  0
  7  8  1  0  0  0
  7  9  1  0  0  0
  7 13  2  0  0  0
  9 14  1  0  0  0
 10 15  1  0  0  0
 11 13  1  0  0  0
 11 21  1  0  0  0
 12 41  1  0  0  0
 13 42  1  0  0  0
 14 24  1  0  0  0
 14 34  2  0  0  0
 15 24  1  0  0  0
 15 35  2  0  0  0
 16 17  1  0  0  0
 16 19  1  0  0  0
 16 36  2  0  0  0
 17 18  1  0  0  0
 17 25  1  0  0  0
 19 20  1  0  0  0
 19 28  1  0  0  0
 21 22  1  0  0  0
 21 23  1  0  0  0
 24 28  1  0  0  0
 25 26  1  0  0  0
 25 27  1  0  0  0
 28 29  1  0  0  0
 30 31  1  0  0  0
 30 41  1  0  0  0
 32 33  1  0  0  0
 32 42  1  0  0  0
 37 41  2  0  0  0
 38 41  2  0  0  0
 39 42  2  0  0  0
 40 42  2  0  0  0
M  END
$$$$
Molecule-007-Meropenem
  Cerius2 10300711153D 1   1.00000                          
Structure written by Cerius2 SD Exporter
 51 53  0  0  0  0  0  0  0  0999 V2000
   -0.3010    3.2354   -0.3636 C   0  0  0  0  0  0
   -0.7731    1.9192   -0.4672 C   0  0  0  0  0  0
   -1.3860    4.7200    1.3251 C   0  0  0  0  0  0
    4.2881    1.6900   -1.9264 C   0  0  0  0  0  0
    0.4571    3.9955   -1.2716 C   0  0  0  0  0  0
   -3.2011    1.6068    0.1955 C   0  0  0  0  0  0
   -3.3764    0.8118   -0.5320 H   0  0  0  0  0  0
   -3.8494    1.4320    1.0561 H   0  0  0  0  0  0
   -3.4706    2.5616   -0.2612 H   0  0  0  0  0  0
   -2.6854    5.5280    4.1943 C   0  0  0  0  0  0
   -2.5882    5.6756    5.2715 H   0  0  0  0  0  0
   -2.2363    6.3831    3.6856 H   0  0  0  0  0  0
   -3.7478    5.4870    3.9464 H   0  0  0  0  0  0
    2.9448   -0.3927   -2.5251 C   0  0  0  0  0  0
    3.7190   -1.1342   -2.7395 H   0  0  0  0  0  0
    2.6749    0.1258   -3.4506 H   0  0  0  0  0  0
    1.6922   -1.0358   -1.9139 C   0  0  0  0  0  0
    1.0095   -1.3905   -2.6907 H   0  0  0  0  0  0
    1.9838   -1.8903   -1.2952 H   0  0  0  0  0  0
   -1.7173    1.6029    0.6432 C   0  0  0  0  0  0
   -1.4778    0.6175    1.0534 H   0  0  0  0  0  0
   -2.1675    3.9004    2.2634 C   0  0  0  0  0  0
   -3.2219    3.8650    1.9763 H   0  0  0  0  0  0
    3.3889    0.5999   -1.4309 C   0  0  0  0  0  0
    3.8624    0.0286   -0.6310 H   0  0  0  0  0  0
   -1.3453    2.6805    1.7015 C   0  0  0  0  0  0
   -0.5456    2.3393    2.3723 H   0  0  0  0  0  0
   -1.9809    4.2163    3.7756 C   0  0  0  0  0  0
   -2.4248    3.3939    4.3443 H   0  0  0  0  0  0
    1.0890    0.0779   -1.0242 C   0  0  0  0  0  0
    0.8509   -0.3308   -0.0381 H   0  0  0  0  0  0
    6.3737    3.0157   -2.0558 C   0  0  0  0  0  0
    7.2799    2.6137   -2.5149 H   0  0  0  0  0  0
    5.8643    3.6073   -2.8186 H   0  0  0  0  0  0
    6.6629    3.7026   -1.2571 H   0  0  0  0  0  0
    6.2174    1.1207   -0.4923 C   0  0  0  0  0  0
    7.2452    1.4280   -0.2790 H   0  0  0  0  0  0
    5.6630    1.1889    0.4463 H   0  0  0  0  0  0
    6.2573    0.0776   -0.8137 H   0  0  0  0  0  0
    2.1245    1.1233   -0.8796 N   0  0  0  0  0  0
    1.8383    1.8872   -1.4891 H   0  0  0  0  0  0
   -0.8462    3.6276    0.7939 N   0  0  0  0  0  0
    5.5791    1.9318   -1.5072 N   0  0  0  0  0  0
    0.9070    3.4875   -2.4395 O   0  0  0  0  0  0
    1.4472    4.0516   -3.0317 H   0  0  0  0  0  0
   -0.5993    4.2960    4.1318 O   0  0  0  0  0  0
   -0.5851    4.4645    5.0992 H   0  0  0  0  0  0
   -1.4331    5.9237    0.9896 O   0  0  0  0  0  0
    3.7802    2.4215   -2.8122 O   0  0  0  0  0  0
    0.7683    5.1816   -1.0274 O   0  0  0  0  0  0
   -0.4174    0.7879   -1.7451 S   0  0  0  0  0  0
  1  2  2  0  0  0
  1  5  1  0  0  0
  1 42  1  0  0  0
  2 20  1  0  0  0
  2 51  1  0  0  0
  3 22  1  0  0  0
  3 42  1  0  0  0
  3 48  2  0  0  0
  4 24  1  0  0  0
  4 43  1  0  0  0
  4 49  2  0  0  0
  5 44  1  0  0  0
  5 50  2  0  0  0
  6  7  1  0  0  0
  6  8  1  0  0  0
  6  9  1  0  0  0
  6 20  1  0  0  0
 10 11  1  0  0  0
 10 12  1  0  0  0
 10 13  1  0  0  0
 10 28  1  0  0  0
 14 15  1  0  0  0
 14 16  1  0  0  0
 14 17  1  0  0  0
 14 24  1  0  0  0
 17 18  1  0  0  0
 17 19  1  0  0  0
 17 30  1  0  0  0
 20 21  1  0  0  0
 20 26  1  0  0  0
 22 23  1  0  0  0
 22 26  1  0  0  0
 22 28  1  0  0  0
 24 25  1  0  0  0
 24 40  1  0  0  0
 26 27  1  0  0  0
 26 42  1  0  0  0
 28 29  1  0  0  0
 28 46  1  0  0  0
 30 31  1  0  0  0
 30 40  1  0  0  0
 30 51  1  0  0  0
 32 33  1  0  0  0
 32 34  1  0  0  0
 32 35  1  0  0  0
 32 43  1  0  0  0
 36 37  1  0  0  0
 36 38  1  0  0  0
 36 39  1  0  0  0
 36 43  1  0  0  0
 40 41  1  0  0  0
 44 45  1  0  0  0
 46 47  1  0  0  0
M  END
$$$$
Molecule-008-Mezlocillin
  Cerius2 10300711153D 1   1.00000                          
Structure written by Cerius2 SD Exporter
 61 64  0  0  0  0  0  0  0  0999 V2000
    5.4267   -2.2356    1.6509 C   0  0  0  0  0  0
    6.2921   -2.2437    2.1953 H   0  0  0  0  0  0
    5.4068   -1.6627    0.3684 C   0  0  0  0  0  0
    6.2622   -1.2601   -0.0221 H   0  0  0  0  0  0
    4.2553   -2.7985    2.1838 C   0  0  0  0  0  0
    4.2692   -3.2157    3.1175 H   0  0  0  0  0  0
    4.2136   -1.6505   -0.3770 C   0  0  0  0  0  0
    4.2236   -1.2190   -1.3054 H   0  0  0  0  0  0
    3.0638   -2.7885    1.4352 C   0  0  0  0  0  0
    2.2337   -3.2072    1.8574 H   0  0  0  0  0  0
    3.0167   -2.2127    0.1379 C   0  0  0  0  0  0
    0.5814   -2.8799   -0.1809 C   0  0  0  0  0  0
   -2.1311   -1.9174    2.1434 C   0  0  0  0  0  0
   -4.8258   -0.3578    1.9508 C   0  0  0  0  0  0
    1.3683    0.3003   -0.3291 C   0  0  0  0  0  0
    1.2320    2.7166   -0.2212 C   0  0  0  0  0  0
   -5.0431   -0.6428   -1.4386 C   0  0  0  0  0  0
   -4.6939   -0.3638   -2.4353 H   0  0  0  0  0  0
   -5.6302   -1.5594   -1.5303 H   0  0  0  0  0  0
   -5.6993    0.1487   -1.0710 H   0  0  0  0  0  0
   -2.9428    0.4331   -0.4517 C   0  0  0  0  0  0
   -2.4991    0.6070   -1.4350 H   0  0  0  0  0  0
   -3.5201    1.3217   -0.1981 H   0  0  0  0  0  0
   -2.1309    0.3370    0.2715 H   0  0  0  0  0  0
   -3.8432   -0.8459   -0.4677 C   0  0  0  0  0  0
    1.7753   -2.1592   -0.7096 C   0  0  0  0  0  0
    2.0455   -2.6847   -1.6327 H   0  0  0  0  0  0
   -1.3168   -2.8747    1.3921 C   0  0  0  0  0  0
   -1.0970   -3.7642    1.9878 H   0  0  0  0  0  0
   -4.3163   -1.3288    0.9510 C   0  0  0  0  0  0
   -5.1257   -2.0562    0.8318 H   0  0  0  0  0  0
    1.0683    1.7813   -2.2861 C   0  0  0  0  0  0
    0.1474    1.3234   -2.6604 H   0  0  0  0  0  0
    1.9241    1.3903   -2.8453 H   0  0  0  0  0  0
    1.0034    3.3181   -2.4103 C   0  0  0  0  0  0
    1.8232    3.6983   -3.0272 H   0  0  0  0  0  0
    0.0459    3.6423   -2.8295 H   0  0  0  0  0  0
   -2.5854   -3.0244    0.4861 C   0  0  0  0  0  0
   -3.0830   -3.9972    0.5442 H   0  0  0  0  0  0
    2.7264    5.7681    0.2564 C   0  0  0  0  0  0
    2.8084    5.1923    1.1776 H   0  0  0  0  0  0
    3.5655    5.5298   -0.3970 H   0  0  0  0  0  0
    2.7432    6.8316    0.4943 H   0  0  0  0  0  0
   -0.1614   -2.2977    0.7851 N   0  0  0  0  0  0
    0.1315   -1.4236    1.0793 H   0  0  0  0  0  0
    1.4509   -0.8075   -1.1154 N   0  0  0  0  0  0
    1.2935   -0.6718   -2.0605 H   0  0  0  0  0  0
   -3.1723   -2.0700    1.3234 N   0  0  0  0  0  0
    1.2204    1.5386   -0.8846 N   0  0  0  0  0  0
    1.1367    3.7487   -1.0672 N   0  0  0  0  0  0
   -5.1427    0.9228    1.6707 O   0  0  0  0  0  0
   -5.5387    1.4600    2.3894 H   0  0  0  0  0  0
    0.2738   -4.0099   -0.6299 O   0  0  0  0  0  0
   -1.8738   -1.1190    3.0713 O   0  0  0  0  0  0
   -5.0684   -0.7371    3.1178 O   0  0  0  0  0  0
    1.4636    0.1692    0.9145 O   0  0  0  0  0  0
    1.3480    2.8669    1.0159 O   0  0  0  0  0  0
    1.0484    6.2784   -1.8760 O   0  0  0  0  0  0
   -0.0554    5.6649    0.3691 O   0  0  0  0  0  0
    1.1821    5.3681   -0.5810 S   0  0  0  0  0  0
   -2.7857   -2.1965   -1.1129 S   0  0  0  0  0  0
  1  2  1  0  0  0
  1  3  2  0  0  0
  1  5  1  0  0  0
  3  4  1  0  0  0
  3  7  1  0  0  0
  5  6  1  0  0  0
  5  9  2  0  0  0
  7  8  1  0  0  0
  7 11  2  0  0  0
  9 10  1  0  0  0
  9 11  1  0  0  0
 11 26  1  0  0  0
 12 26  1  0  0  0
 12 44  1  0  0  0
 12 53  2  0  0  0
 13 28  1  0  0  0
 13 48  1  0  0  0
 13 54  2  0  0  0
 14 30  1  0  0  0
 14 51  1  0  0  0
 14 55  2  0  0  0
 15 46  1  0  0  0
 15 49  1  0  0  0
 15 56  2  0  0  0
 16 49  1  0  0  0
 16 50  1  0  0  0
 16 57  2  0  0  0
 17 18  1  0  0  0
 17 19  1  0  0  0
 17 20  1  0  0  0
 17 25  1  0  0  0
 21 22  1  0  0  0
 21 23  1  0  0  0
 21 24  1  0  0  0
 21 25  1  0  0  0
 25 30  1  0  0  0
 25 61  1  0  0  0
 26 27  1  0  0  0
 26 46  1  0  0  0
 28 29  1  0  0  0
 28 38  1  0  0  0
 28 44  1  0  0  0
 30 31  1  0  0  0
 30 48  1  0  0  0
 32 33  1  0  0  0
 32 34  1  0  0  0
 32 35  1  0  0  0
 32 49  1  0  0  0
 35 36  1  0  0  0
 35 37  1  0  0  0
 35 50  1  0  0  0
 38 39  1  0  0  0
 38 48  1  0  0  0
 38 61  1  0  0  0
 40 41  1  0  0  0
 40 42  1  0  0  0
 40 43  1  0  0  0
 40 60  1  0  0  0
 44 45  1  0  0  0
 46 47  1  0  0  0
 50 60  1  0  0  0
 51 52  1  0  0  0
 58 60  2  0  0  0
 59 60  2  0  0  0
M  END
$$$$
Molecule-009-Netilmicin
  Cerius2 10300711153D 1   1.00000                          

 74 76  0  0  0  0  0  0  0  0999 V2000
    3.2416   -6.2474    5.8824 C   0  0  0  0  0  0
    3.8537   -5.7321    7.2184 C   0  0  0  0  0  0
    4.8802   -4.6812    7.0227 C   0  0  0  0  0  0
    4.9319   -3.9284    5.8357 C   0  0  0  0  0  0
    2.8848   -5.0472    4.9560 C   0  0  0  0  0  0
    3.9969   -4.1399    4.8675 O   0  0  0  0  0  0
    4.3100   -5.7070    1.4921 N   0  0  0  0  0  0
    2.4399   -5.5334    3.6687 O   0  0  0  0  0  0
    2.3203   -4.6362    2.5282 C   0  0  0  0  0  0
    3.6805   -4.4150    1.7995 C   0  0  0  0  0  0
    3.4978   -3.6036    0.4886 C   0  0  0  0  0  0
    1.5916   -3.2841    2.8040 C   0  0  0  0  0  0
    1.4880   -2.3736    1.5389 C   0  0  0  0  0  0
    2.8320   -2.2200    0.7485 C   0  0  0  0  0  0
    2.5525   -1.5082   -0.5303 N   0  0  0  0  0  0
    0.7639   -1.1501    1.8353 O   0  0  0  0  0  0
    4.1888   -7.1703    5.2289 N   0  0  0  0  0  0
    5.9646   -2.9017    5.5981 C   0  0  0  0  0  0
    7.3032   -3.4992    5.5209 N   0  0  0  0  0  0
    3.7001   -0.8665   -1.2111 C   0  0  0  0  0  0
    3.2055   -0.1109   -2.4591 C   0  0  0  0  0  0
    0.2770   -3.5555    3.3024 O   0  0  0  0  0  0
    2.3327   -6.8156    6.0987 H   0  0  0  0  0  0
    3.0621   -5.3166    7.8467 H   0  0  0  0  0  0
    4.2984   -6.5716    7.7596 H   0  0  0  0  0  0
    5.5512   -4.4976    7.7728 H   0  0  0  0  0  0
    2.0582   -4.5034    5.4215 H   0  0  0  0  0  0
    4.4802   -3.4547    0.0337 H   0  0  0  0  0  0
    2.8883   -4.1770   -0.2164 H   0  0  0  0  0  0
    2.1381   -2.7522    3.5758 H   0  0  0  0  0  0
    5.7669   -2.3900    4.6538 H   0  0  0  0  0  0
    5.9396   -2.1599    6.3989 H   0  0  0  0  0  0
    4.1865   -0.1555   -0.5379 H   0  0  0  0  0  0
    4.4316   -1.6157   -1.5210 H   0  0  0  0  0  0
    4.0476    0.3699   -2.9602 H   0  0  0  0  0  0
    2.7313   -0.8039   -3.1570 H   0  0  0  0  0  0
    2.4826    0.6561   -2.1736 H   0  0  0  0  0  0
    5.2497   -5.5028    1.1463 H   0  0  0  0  0  0
    4.4232   -6.1918    2.3854 H   0  0  0  0  0  0
    2.1321   -2.1773   -1.1809 H   0  0  0  0  0  0
    3.7719   -7.4439    4.3359 H   0  0  0  0  0  0
    5.0321   -6.6354    5.0090 H   0  0  0  0  0  0
    7.9594   -2.7387    5.3309 H   0  0  0  0  0  0
    7.5311   -3.8650    6.4482 H   0  0  0  0  0  0
    0.4038   -4.2233    4.0081 H   0  0  0  0  0  0
    1.6848   -5.1901    1.8304 H   0  0  0  0  0  0
    4.3657   -3.8642    2.4466 H   0  0  0  0  0  0
    0.8088   -2.9052    0.8649 H   0  0  0  0  0  0
    3.5213   -1.6268    1.3534 H   0  0  0  0  0  0
    1.4019    0.1103    2.1716 C   0  0  0  0  0  0
    0.3644    1.1113    2.1070 O   0  0  0  0  0  0
    2.1217    0.3828    1.3978 H   0  0  0  0  0  0
    2.0920    0.2361    3.5627 C   0  0  0  0  0  0
   -0.6832    0.9642    3.0953 C   0  0  0  0  0  0
    1.0588   -0.0197    4.7029 C   0  0  0  0  0  0
   -0.1466    0.9792    4.5643 C   0  0  0  0  0  0
    3.2590   -0.5808    3.6607 O   0  0  0  0  0  0
    2.4500    1.2666    3.6536 H   0  0  0  0  0  0
   -1.3777    1.7951    2.9570 H   0  0  0  0  0  0
   -1.2409    0.0434    2.8994 H   0  0  0  0  0  0
    0.6571   -1.0310    4.5821 H   0  0  0  0  0  0
    1.7303    0.1098    6.0322 N   0  0  0  0  0  0
    0.2877    2.3144    4.8549 O   0  0  0  0  0  0
   -1.2998    0.6470    5.5558 C   0  0  0  0  0  0
    3.6502   -0.3533    4.5318 H   0  0  0  0  0  0
    1.0676    0.5408    6.6790 H   0  0  0  0  0  0
    2.1508   -1.1549    6.6742 C   0  0  0  0  0  0
    0.6869    2.2657    5.7488 H   0  0  0  0  0  0
   -0.9630    0.7316    6.5897 H   0  0  0  0  0  0
   -2.1309    1.3416    5.4174 H   0  0  0  0  0  0
   -1.6685   -0.3685    5.3956 H   0  0  0  0  0  0
    2.8347   -1.7144    6.0369 H   0  0  0  0  0  0
    1.2822   -1.7756    6.9025 H   0  0  0  0  0  0
    2.6633   -0.9200    7.6073 H   0  0  0  0  0  0
  1  2  1  0  0  0
  1 17  1  0  0  0
  1 23  1  0  0  0
  2  3  1  0  0  0
  2 24  1  0  0  0
  2 25  1  0  0  0
  3  4  2  0  0  0
  3 26  1  0  0  0
  4 18  1  0  0  0
  5  1  1  0  0  0
  5  6  1  0  0  0
  5  8  1  0  0  0
  5 27  1  0  0  0
  6  4  1  0  0  0
  7 10  1  0  0  0
  7 38  1  0  0  0
  7 39  1  0  0  0
  9  8  1  0  0  0
  9 10  1  0  0  0
  9 12  1  0  0  0
 10 11  1  0  0  0
 11 14  1  0  0  0
 11 28  1  0  0  0
 11 29  1  0  0  0
 12 22  1  0  0  0
 12 30  1  0  0  0
 13 12  1  0  0  0
 13 14  1  0  0  0
 13 16  1  0  0  0
 14 15  1  0  0  0
 15 20  1  0  0  0
 15 40  1  0  0  0
 17 41  1  0  0  0
 17 42  1  0  0  0
 18 19  1  0  0  0
 18 31  1  0  0  0
 18 32  1  0  0  0
 19 43  1  0  0  0
 19 44  1  0  0  0
 20 21  1  0  0  0
 20 33  1  0  0  0
 20 34  1  0  0  0
 21 35  1  0  0  0
 21 36  1  0  0  0
 21 37  1  0  0  0
 22 45  1  0  0  0
 46  9  1  0  0  0
 47 10  1  0  0  0
 48 13  1  0  0  0
 49 14  1  0  0  0
 50 16  1  0  0  0
 51 50  1  0  0  0
 52 50  1  0  0  0
 53 50  1  0  0  0
 53 57  1  0  0  0
 53 58  1  0  0  0
 54 51  1  0  0  0
 54 59  1  0  0  0
 54 60  1  0  0  0
 55 53  1  0  0  0
 55 61  1  0  0  0
 55 62  1  0  0  0
 56 54  1  0  0  0
 56 55  1  0  0  0
 56 63  1  0  0  0
 56 64  1  0  0  0
 57 65  1  0  0  0
 62 66  1  0  0  0
 62 67  1  0  0  0
 63 68  1  0  0  0
 64 69  1  0  0  0
 64 70  1  0  0  0
 64 71  1  0  0  0
 67 72  1  0  0  0
 67 73  1  0  0  0
 67 74  1  0  0  0
M  END
$$$$
Molecule-010-Pentamidine
  Cerius2 10300711153D 1   1.00000                          
Structure written by Cerius2 SD Exporter
 49 50  0  0  0  0  0  0  0  0999 V2000
   -5.9979   -1.7386    0.0300 C   0  0  0  0  0  0
   -6.0189   -2.7335    0.2630 H   0  0  0  0  0  0
   -7.0621    0.3263   -0.6615 C   0  0  0  0  0  0
   -7.8800    0.8718   -0.9450 H   0  0  0  0  0  0
    6.7352    0.3716    0.7190 C   0  0  0  0  0  0
    7.4311    0.6017    1.4330 H   0  0  0  0  0  0
    6.0199   -0.8135   -1.2705 C   0  0  0  0  0  0
    6.1767   -1.4660   -2.0412 H   0  0  0  0  0  0
   -4.7584   -1.0749    0.1048 C   0  0  0  0  0  0
   -3.9287   -1.5999    0.3858 H   0  0  0  0  0  0
   -5.8233    0.9896   -0.5868 C   0  0  0  0  0  0
   -5.7686    1.9854   -0.8136 H   0  0  0  0  0  0
    5.4758    0.9952    0.8023 C   0  0  0  0  0  0
    5.2948    1.6513    1.5635 H   0  0  0  0  0  0
    4.7607   -0.1902   -1.1870 C   0  0  0  0  0  0
    4.0452   -0.4007   -1.8870 H   0  0  0  0  0  0
   -7.1801   -1.0544   -0.3550 C   0  0  0  0  0  0
    7.0385   -0.5477   -0.3191 C   0  0  0  0  0  0
   -4.6608    0.2979   -0.2039 C   0  0  0  0  0  0
    4.4754    0.7185   -0.1527 C   0  0  0  0  0  0
   -8.4308   -1.7157   -0.4325 C   0  0  0  0  0  0
    8.3085   -1.1712   -0.3967 C   0  0  0  0  0  0
    0.2535    1.3781    0.4726 C   0  0  0  0  0  0
    0.2685    0.9831    1.4924 H   0  0  0  0  0  0
    0.5974    0.5899   -0.2031 H   0  0  0  0  0  0
   -1.2040    1.7617    0.1002 C   0  0  0  0  0  0
   -1.5528    2.5515    0.7713 H   0  0  0  0  0  0
   -1.2257    2.1506   -0.9217 H   0  0  0  0  0  0
    1.2280    2.5841    0.3834 C   0  0  0  0  0  0
    1.2302    2.9753   -0.6378 H   0  0  0  0  0  0
    0.8758    3.3783    1.0475 H   0  0  0  0  0  0
   -2.1828    0.5689    0.1946 C   0  0  0  0  0  0
   -1.8687   -0.2216   -0.4921 H   0  0  0  0  0  0
   -2.1892    0.1772    1.2153 H   0  0  0  0  0  0
    2.6808    2.2299    0.7788 C   0  0  0  0  0  0
    3.2844    3.1412    0.7599 H   0  0  0  0  0  0
    2.6971    1.8205    1.7923 H   0  0  0  0  0  0
   -9.5577   -1.0817   -0.7951 N   0  0  0  0  0  0
  -10.3953   -1.5669   -0.8369 H   0  0  0  0  0  0
    9.2810   -0.9401    0.5002 N   0  0  0  0  0  0
   10.1376   -1.3860    0.4135 H   0  0  0  0  0  0
   -8.6063   -3.0194   -0.1550 N   0  0  0  0  0  0
   -7.8594   -3.5720    0.1169 H   0  0  0  0  0  0
   -9.4892   -3.4141   -0.2269 H   0  0  0  0  0  0
    8.6558   -2.0406   -1.3614 N   0  0  0  0  0  0
    8.0308   -2.2793   -2.0610 H   0  0  0  0  0  0
    9.5414   -2.4346   -1.3601 H   0  0  0  0  0  0
   -3.5010    1.0120   -0.1559 O   0  0  0  0  0  0
    3.2332    1.2791   -0.1428 O   0  0  0  0  0  0
  1  2  1  0  0  0
  1  9  1  0  0  0
  1 17  2  0  0  0
  3  4  1  0  0  0
  3 11  2  0  0  0
  3 17  1  0  0  0
  5  6  1  0  0  0
  5 13  2  0  0  0
  5 18  1  0  0  0
  7  8  1  0  0  0
  7 15  1  0  0  0
  7 18  2  0  0  0
  9 10  1  0  0  0
  9 19  2  0  0  0
 11 12  1  0  0  0
 11 19  1  0  0  0
 13 14  1  0  0  0
 13 20  1  0  0  0
 15 16  1  0  0  0
 15 20  2  0  0  0
 17 21  1  0  0  0
 18 22  1  0  0  0
 19 48  1  0  0  0
 20 49  1  0  0  0
 21 38  2  0  0  0
 21 42  1  0  0  0
 22 40  2  0  0  0
 22 45  1  0  0  0
 23 24  1  0  0  0
 23 25  1  0  0  0
 23 26  1  0  0  0
 23 29  1  0  0  0
 26 27  1  0  0  0
 26 28  1  0  0  0
 26 32  1  0  0  0
 29 30  1  0  0  0
 29 31  1  0  0  0
 29 35  1  0  0  0
 32 33  1  0  0  0
 32 34  1  0  0  0
 32 48  1  0  0  0
 35 36  1  0  0  0
 35 37  1  0  0  0
 35 49  1  0  0  0
 38 39  1  0  0  0
 40 41  1  0  0  0
 42 43  1  0  0  0
 42 44  1  0  0  0
 45 46  1  0  0  0
 45 47  1  0  0  0
M  END
$$$$
Molecule-011-Raffinose
  Cerius2 10300711153D 1   1.00000                          

 66 68  0  0  0  0  0  0  0  0999 V2000
   -4.3864   -8.9910    3.2688 O   0  0  0  0  0  0
   -4.0485   -7.7816    2.5929 C   0  0  0  0  0  0
   -2.8290   -7.9766    1.6588 C   0  0  0  0  0  0
   -2.6245   -6.7927    0.8628 O   0  0  0  0  0  0
   -1.3612   -6.2065    1.2198 C   0  0  0  0  0  0
   -1.9501   -4.0168    2.4222 C   0  0  0  0  0  0
   -0.9908   -3.2372    1.6817 O   0  0  0  0  0  0
   -1.1156   -1.8029    1.7760 C   0  0  0  0  0  0
    0.5823    0.5907    4.1331 C   0  0  0  0  0  0
    1.9008    0.0005    4.0180 O   0  0  0  0  0  0
    2.8931    0.4263    4.9842 C   0  0  0  0  0  0
    3.0175    1.9834    4.9951 C   0  0  0  0  0  0
    3.9261    2.4298    6.0063 O   0  0  0  0  0  0
    1.6325    2.6841    5.1205 C   0  0  0  0  0  0
    0.6503    2.1414    4.0456 C   0  0  0  0  0  0
   -2.5610   -1.2995    1.4566 C   0  0  0  0  0  0
   -3.6651   -2.1523    2.1560 C   0  0  0  0  0  0
   -3.4148   -3.6825    2.0127 C   0  0  0  0  0  0
   -3.7225   -4.0860    0.6786 O   0  0  0  0  0  0
   -0.4889   -7.4155    1.6521 C   0  0  0  0  0  0
   -1.5030   -8.2912    2.4020 C   0  0  0  0  0  0
   -1.1615   -9.6823    2.4012 O   0  0  0  0  0  0
    2.7064   -0.2332    6.3820 C   0  0  0  0  0  0
    1.0681    2.5834    2.7464 O   0  0  0  0  0  0
    3.4497    2.2788    4.0334 H   0  0  0  0  0  0
    1.0814    2.5188    6.4313 O   0  0  0  0  0  0
    1.7705    3.7569    4.9619 H   0  0  0  0  0  0
   -3.7551   -1.8052    3.5423 O   0  0  0  0  0  0
   -3.5701   -9.2883    3.7270 H   0  0  0  0  0  0
   -4.9121   -7.4720    2.0006 H   0  0  0  0  0  0
   -3.8443   -7.0004    3.3283 H   0  0  0  0  0  0
    3.9705    3.4064    5.9188 H   0  0  0  0  0  0
   -4.6360   -1.9180    1.7090 H   0  0  0  0  0  0
   -4.0936   -4.2194    2.6804 H   0  0  0  0  0  0
   -3.4570   -5.0212    0.6511 H   0  0  0  0  0  0
   -1.1237   -9.9604    1.4601 H   0  0  0  0  0  0
    0.2564    3.0509    6.4442 H   0  0  0  0  0  0
   -4.0671   -0.8750    3.5641 H   0  0  0  0  0  0
   -1.5490   -7.9555    3.4432 H   0  0  0  0  0  0
   -3.0601   -8.7905    0.9647 H   0  0  0  0  0  0
   -1.5692   -5.4066    2.4180 O   0  0  0  0  0  0
    0.6353   -7.0374    2.4570 O   0  0  0  0  0  0
   -0.1237   -7.9663    0.7802 H   0  0  0  0  0  0
   -0.7278   -5.4912   -0.0143 C   0  0  0  0  0  0
   -0.5953   -6.3572   -1.1425 O   0  0  0  0  0  0
    1.0638   -7.8786    2.7199 H   0  0  0  0  0  0
    0.2601   -5.1078    0.2488 H   0  0  0  0  0  0
   -1.3498   -4.6547   -0.3311 H   0  0  0  0  0  0
   -1.5164   -6.6087   -1.3719 H   0  0  0  0  0  0
    0.1232    0.3174    5.0899 H   0  0  0  0  0  0
   -0.4563   -1.4076    0.9973 H   0  0  0  0  0  0
   -0.5104   -1.3201    3.1190 C   0  0  0  0  0  0
   -0.2477    0.0943    3.0628 O   0  0  0  0  0  0
    0.4161   -1.8817    3.2789 H   0  0  0  0  0  0
   -1.1856   -1.5349    3.9487 H   0  0  0  0  0  0
   -1.8564   -3.7630    3.4815 H   0  0  0  0  0  0
   -2.7543   -1.3197    0.0371 O   0  0  0  0  0  0
   -3.6564   -0.9682   -0.1237 H   0  0  0  0  0  0
   -2.6560   -0.2558    1.7705 H   0  0  0  0  0  0
   -0.3515    2.5407    4.2246 H   0  0  0  0  0  0
    3.8453    0.0414    4.6082 H   0  0  0  0  0  0
    0.9837    3.5611    2.7508 H   0  0  0  0  0  0
    2.7945   -1.6560    6.2994 O   0  0  0  0  0  0
    3.4904    0.1097    7.0607 H   0  0  0  0  0  0
    1.7423    0.0298    6.8150 H   0  0  0  0  0  0
    2.7671   -1.9696    7.2299 H   0  0  0  0  0  0
  1  2  1  0  0  0
  1 29  1  0  0  0
  2  3  1  0  0  0
  2 30  1  0  0  0
  2 31  1  0  0  0
  3  4  1  0  0  0
  4  5  1  0  0  0
  5 20  1  0  0  0
  6  7  1  0  0  0
  6 41  1  0  0  0
  7  8  1  0  0  0
  8 16  1  0  0  0
  9 10  1  0  0  0
  9 53  1  0  0  0
 10 11  1  0  0  0
 11 12  1  0  0  0
 11 61  1  0  0  0
 12 13  1  0  0  0
 12 14  1  0  0  0
 13 32  1  0  0  0
 14 15  1  0  0  0
 15  9  1  0  0  0
 16 17  1  0  0  0
 17 18  1  0  0  0
 17 33  1  0  0  0
 18  6  1  0  0  0
 18 19  1  0  0  0
 18 34  1  0  0  0
 19 35  1  0  0  0
 20 21  1  0  0  0
 21  3  1  0  0  0
 21 22  1  0  0  0
 22 36  1  0  0  0
 23 11  1  0  0  0
 23 63  1  0  0  0
 23 64  1  0  0  0
 23 65  1  0  0  0
 24 15  1  0  0  0
 24 62  1  0  0  0
 25 12  1  0  0  0
 26 14  1  0  0  0
 26 37  1  0  0  0
 27 14  1  0  0  0
 28 17  1  0  0  0
 28 38  1  0  0  0
 39 21  1  0  0  0
 40  3  1  0  0  0
 41  5  1  0  0  0
 42 20  1  0  0  0
 42 46  1  0  0  0
 43 20  1  0  0  0
 44  5  1  0  0  0
 44 47  1  0  0  0
 44 48  1  0  0  0
 45 44  1  0  0  0
 45 49  1  0  0  0
 50  9  1  0  0  0
 51  8  1  0  0  0
 52  8  1  0  0  0
 52 54  1  0  0  0
 52 55  1  0  0  0
 53 52  1  0  0  0
 56  6  1  0  0  0
 57 16  1  0  0  0
 57 58  1  0  0  0
 59 16  1  0  0  0
 60 15  1  0  0  0
 63 66  1  0  0  0
M  END
$$$$
Molecule-012-Streptozocin
  Cerius2 10300711153D 1   1.00000                          
Structure written by Cerius2 SD Exporter
 33 33  0  0  0  0  0  0  0  0999 V2000
    1.5281   -3.1185   -1.2257 C   0  0  0  0  0  0
    0.0673   -1.4032   -0.1541 C   0  0  0  0  0  0
    0.9467   -0.7674   -0.0011 H   0  0  0  0  0  0
   -0.7740   -1.3426    1.1530 C   0  0  0  0  0  0
   -1.6070   -2.0489    1.0785 H   0  0  0  0  0  0
   -1.3457    0.0814    1.4051 C   0  0  0  0  0  0
   -0.5172    0.7496    1.6595 H   0  0  0  0  0  0
   -2.0741    0.6330    0.1385 C   0  0  0  0  0  0
   -3.0074    0.0804   -0.0088 H   0  0  0  0  0  0
   -2.4402    2.1370    0.2530 C   0  0  0  0  0  0
   -1.5335    2.7302    0.3933 H   0  0  0  0  0  0
   -2.9166    2.4594   -0.6762 H   0  0  0  0  0  0
   -0.7531   -0.8155   -1.3406 C   0  0  0  0  0  0
   -0.0897   -0.7171   -2.2035 H   0  0  0  0  0  0
    2.9310   -4.8653   -2.2757 C   0  0  0  0  0  0
    2.5437   -5.4978   -3.0776 H   0  0  0  0  0  0
    3.4810   -4.0453   -2.7415 H   0  0  0  0  0  0
    3.6447   -5.4469   -1.6882 H   0  0  0  0  0  0
    0.4991   -2.7501   -0.4196 N   0  0  0  0  0  0
   -0.0020   -3.4654   -0.0001 H   0  0  0  0  0  0
    1.1123   -5.3348   -0.8173 N   0  0  0  0  0  0
    1.8405   -4.4340   -1.4264 N   0  0  0  0  0  0
   -3.3407    2.4006    1.3305 O   0  0  0  0  0  0
   -3.5219    3.3654    1.2902 H   0  0  0  0  0  0
    0.0316   -1.7384    2.2658 O   0  0  0  0  0  0
   -0.5601   -1.6554    3.0465 H   0  0  0  0  0  0
   -2.2370    0.0252    2.5223 O   0  0  0  0  0  0
   -2.6901    0.8916    2.5006 H   0  0  0  0  0  0
   -1.8302   -1.6592   -1.7491 O   0  0  0  0  0  0
   -2.4511   -1.6843   -0.9951 H   0  0  0  0  0  0
    2.1892   -2.2119   -1.7873 O   0  0  0  0  0  0
    1.2438   -6.5300   -0.8807 O   0  0  0  0  0  0
   -1.2415    0.5066   -1.0387 O   0  0  0  0  0  0
  1 19  1  0  0  0
  1 22  1  0  0  0
  1 31  2  0  0  0
  2  3  1  0  0  0
  2  4  1  0  0  0
  2 13  1  0  0  0
  2 19  1  0  0  0
  4  5  1  0  0  0
  4  6  1  0  0  0
  4 25  1  0  0  0
  6  7  1  0  0  0
  6  8  1  0  0  0
  6 27  1  0  0  0
  8  9  1  0  0  0
  8 10  1  0  0  0
  8 33  1  0  0  0
 10 11  1  0  0  0
 10 12  1  0  0  0
 10 23  1  0  0  0
 13 14  1  0  0  0
 13 29  1  0  0  0
 13 33  1  0  0  0
 15 16  1  0  0  0
 15 17  1  0  0  0
 15 18  1  0  0  0
 15 22  1  0  0  0
 19 20  1  0  0  0
 21 22  1  0  0  0
 21 32  2  0  0  0
 23 24  1  0  0  0
 25 26  1  0  0  0
 27 28  1  0  0  0
 29 30  1  0  0  0
M  END
$$$$
Molecule-013-Tobramycin
  Cerius2 10300711153D 1   1.00000                          
Structure written by Cerius2 SD Exporter
 69 71  0  0  0  0  0  0  0  0999 V2000
   -1.3991    2.3985   -0.8045 C   0  0  0  0  0  0
   -1.5761    3.4717   -0.6885 H   0  0  0  0  0  0
   -2.1299    2.0218   -1.5269 H   0  0  0  0  0  0
    3.4630    1.6535    2.3329 C   0  0  0  0  0  0
    2.6793    1.3527    3.0346 H   0  0  0  0  0  0
    4.3848    1.7449    2.9148 H   0  0  0  0  0  0
    0.0488    2.1719   -1.3407 C   0  0  0  0  0  0
    0.6955    2.9279   -0.8894 H   0  0  0  0  0  0
   -1.6317    1.6785    0.5505 C   0  0  0  0  0  0
   -0.9327    2.1173    1.2701 H   0  0  0  0  0  0
   -1.5976   -3.1894    4.1002 C   0  0  0  0  0  0
   -1.9934   -3.2051    5.1200 H   0  0  0  0  0  0
    3.6664    0.5388    1.2628 C   0  0  0  0  0  0
    4.7327    0.4874    1.0248 H   0  0  0  0  0  0
   -0.1248   -3.7040    4.1224 C   0  0  0  0  0  0
   -0.1190   -4.7806    4.3175 H   0  0  0  0  0  0
   -1.6814   -1.7322    3.5613 C   0  0  0  0  0  0
   -2.7276   -1.4524    3.4131 H   0  0  0  0  0  0
    3.0994    3.0495    1.7416 C   0  0  0  0  0  0
    3.5047    3.8362    2.3839 H   0  0  0  0  0  0
   -0.4718   -0.2857   -0.7281 C   0  0  0  0  0  0
   -1.0959   -0.3598   -1.6244 H   0  0  0  0  0  0
    0.6443    0.7554   -1.0230 C   0  0  0  0  0  0
    1.1938    0.3882   -1.8983 H   0  0  0  0  0  0
   -1.3904    0.1306    0.4774 C   0  0  0  0  0  0
   -2.3614   -0.3547    0.3267 H   0  0  0  0  0  0
    3.6027    3.2388    0.2723 C   0  0  0  0  0  0
    3.0907    4.1133   -0.1400 H   0  0  0  0  0  0
    0.6415   -3.4069    2.7889 C   0  0  0  0  0  0
    1.7097   -3.4772    3.0150 H   0  0  0  0  0  0
    5.1253    3.5341    0.1695 C   0  0  0  0  0  0
    5.7011    2.7215    0.6138 H   0  0  0  0  0  0
    5.4065    3.6079   -0.8836 H   0  0  0  0  0  0
    0.3947   -4.4550    1.6653 C   0  0  0  0  0  0
    0.6723   -5.4485    2.0228 H   0  0  0  0  0  0
   -0.6534   -4.4838    1.3691 H   0  0  0  0  0  0
    2.9237    0.8531   -0.0650 C   0  0  0  0  0  0
    3.2178    0.0789   -0.7817 H   0  0  0  0  0  0
   -0.9372   -1.6217    2.2012 C   0  0  0  0  0  0
   -1.4619   -2.2410    1.4654 H   0  0  0  0  0  0
    5.5064    4.7920    0.8300 N   0  0  0  0  0  0
    6.5119    4.9156    0.6884 H   0  0  0  0  0  0
    5.0430    5.5543    0.3293 H   0  0  0  0  0  0
    0.0580    2.4433   -2.7888 N   0  0  0  0  0  0
    1.0289    2.3879   -3.1076 H   0  0  0  0  0  0
   -0.4541    1.6868   -3.2478 H   0  0  0  0  0  0
   -2.9844    1.9707    1.0556 N   0  0  0  0  0  0
   -3.0556    2.9841    1.1653 H   0  0  0  0  0  0
   -3.6520    1.7003    0.3301 H   0  0  0  0  0  0
   -2.4559   -4.0875    3.3056 N   0  0  0  0  0  0
   -3.4205   -3.7615    3.4100 H   0  0  0  0  0  0
   -2.4161   -5.0130    3.7405 H   0  0  0  0  0  0
    3.3013   -0.7943    1.7787 N   0  0  0  0  0  0
    3.7475   -0.9054    2.6920 H   0  0  0  0  0  0
    2.2908   -0.8264    1.9321 H   0  0  0  0  0  0
    1.1823   -4.1777    0.5095 O   0  0  0  0  0  0
    0.8411   -3.3346    0.1556 H   0  0  0  0  0  0
    0.5748   -3.0956    5.2148 O   0  0  0  0  0  0
    0.1105   -3.3886    6.0301 H   0  0  0  0  0  0
   -1.1408   -0.8312    4.5321 O   0  0  0  0  0  0
   -0.2212   -1.1469    4.6609 H   0  0  0  0  0  0
    1.6810    3.2090    1.7665 O   0  0  0  0  0  0
    1.3728    2.4457    1.2435 H   0  0  0  0  0  0
    0.1104   -1.5778   -0.5574 O   0  0  0  0  0  0
    0.5479   -1.5145    0.3180 H   0  0  0  0  0  0
    1.4958    0.7924    0.1493 O   0  0  0  0  0  0
    0.4376   -2.0468    2.3283 O   0  0  0  0  0  0
    3.2972    2.1359   -0.6258 O   0  0  0  0  0  0
   -0.8704   -0.2449    1.7801 O   0  0  0  0  0  0
  1  2  1  0  0  0
  1  3  1  0  0  0
  1  7  1  0  0  0
  1  9  1  0  0  0
  4  5  1  0  0  0
  4  6  1  0  0  0
  4 13  1  0  0  0
  4 19  1  0  0  0
  7  8  1  0  0  0
  7 23  1  0  0  0
  7 44  1  0  0  0
  9 10  1  0  0  0
  9 25  1  0  0  0
  9 47  1  0  0  0
 11 12  1  0  0  0
 11 15  1  0  0  0
 11 17  1  0  0  0
 11 50  1  0  0  0
 13 14  1  0  0  0
 13 37  1  0  0  0
 13 53  1  0  0  0
 15 16  1  0  0  0
 15 29  1  0  0  0
 15 58  1  0  0  0
 17 18  1  0  0  0
 17 39  1  0  0  0
 17 60  1  0  0  0
 19 20  1  0  0  0
 19 27  1  0  0  0
 19 62  1  0  0  0
 21 22  1  0  0  0
 21 23  1  0  0  0
 21 25  1  0  0  0
 21 64  1  0  0  0
 23 24  1  0  0  0
 23 66  1  0  0  0
 25 26  1  0  0  0
 25 69  1  0  0  0
 27 28  1  0  0  0
 27 31  1  0  0  0
 27 68  1  0  0  0
 29 30  1  0  0  0
 29 34  1  0  0  0
 29 67  1  0  0  0
 31 32  1  0  0  0
 31 33  1  0  0  0
 31 41  1  0  0  0
 34 35  1  0  0  0
 34 36  1  0  0  0
 34 56  1  0  0  0
 37 38  1  0  0  0
 37 66  1  0  0  0
 37 68  1  0  0  0
 39 40  1  0  0  0
 39 67  1  0  0  0
 39 69  1  0  0  0
 41 42  1  0  0  0
 41 43  1  0  0  0
 44 45  1  0  0  0
 44 46  1  0  0  0
 47 48  1  0  0  0
 47 49  1  0  0  0
 50 51  1  0  0  0
 50 52  1  0  0  0
 53 54  1  0  0  0
 53 55  1  0  0  0
 56 57  1  0  0  0
 58 59  1  0  0  0
 60 61  1  0  0  0
 62 63  1  0  0  0
 64 65  1  0  0  0
M  END
$$$$
Molecule-014-Vancomycin
  Cerius2 10300711153D 1   1.00000                          
Structure written by Cerius2 SD Exporter
176185  0  0  0  0  0  0  0  0999 V2000
    6.2292   -0.3958    2.0215 C   0  0  0  0  0  0
    5.7296   -0.0268    2.8343 H   0  0  0  0  0  0
   -3.1128    2.9017   -0.4780 C   0  0  0  0  0  0
   -2.7023    3.1136   -1.3912 H   0  0  0  0  0  0
    1.4850   -5.3363   -0.7500 C   0  0  0  0  0  0
    1.7370   -5.2335   -1.7364 H   0  0  0  0  0  0
    6.2789   -1.5557   -0.1042 C   0  0  0  0  0  0
    5.7961   -2.0037   -0.8866 H   0  0  0  0  0  0
    9.3696   -4.0382   -2.2813 C   0  0  0  0  0  0
    9.6465   -5.0232   -2.2920 H   0  0  0  0  0  0
   -3.3492    1.5599   -0.1445 C   0  0  0  0  0  0
   -3.1040    0.8237   -0.8108 H   0  0  0  0  0  0
    0.2329   -4.8673   -0.3235 C   0  0  0  0  0  0
   -0.4002   -4.4260   -0.9948 H   0  0  0  0  0  0
   -0.0321   -2.0771    1.4184 C   0  0  0  0  0  0
    0.8647   -2.5622    1.3642 H   0  0  0  0  0  0
   -1.2791   -0.0423    1.5808 C   0  0  0  0  0  0
   -1.3077    0.9687    1.6861 H   0  0  0  0  0  0
    7.6220   -0.2024    1.9432 C   0  0  0  0  0  0
    8.1064    0.3168    2.6798 H   0  0  0  0  0  0
    9.2795   -1.9200   -3.4658 C   0  0  0  0  0  0
    9.4766   -1.3643   -4.3010 H   0  0  0  0  0  0
    1.9731   -6.0763    1.5172 C   0  0  0  0  0  0
    2.6008   -6.5209    2.1917 H   0  0  0  0  0  0
   -4.0560    3.5923    1.6505 C   0  0  0  0  0  0
   -4.3393    4.3311    2.2991 H   0  0  0  0  0  0
    5.5344   -1.1174    1.0193 C   0  0  0  0  0  0
   -0.0275   -0.6675    1.4117 C   0  0  0  0  0  0
    2.3991   -5.8831    0.1803 C   0  0  0  0  0  0
   -3.3756    3.9313    0.4549 C   0  0  0  0  0  0
    8.7497   -3.4721   -1.1374 C   0  0  0  0  0  0
    8.3736   -2.0904   -1.1975 C   0  0  0  0  0  0
    7.6865   -1.4571   -0.1444 C   0  0  0  0  0  0
    9.6317   -3.2762   -3.4307 C   0  0  0  0  0  0
    8.3590   -0.7490    0.8771 C   0  0  0  0  0  0
    8.6506   -1.3261   -2.3601 C   0  0  0  0  0  0
   -1.2243   -2.8388    1.5005 C   0  0  0  0  0  0
   -2.5061   -0.7540    1.6053 C   0  0  0  0  0  0
   -2.4665   -2.1721    1.6249 C   0  0  0  0  0  0
   -0.1233   -4.9378    1.0375 C   0  0  0  0  0  0
   -3.8315    1.2196    1.1369 C   0  0  0  0  0  0
   -4.2844    2.2428    1.9963 C   0  0  0  0  0  0
    0.7141   -5.6136    1.9491 C   0  0  0  0  0  0
    2.1359    4.8792   -0.8734 C   0  0  0  0  0  0
   -0.7439    8.0909    0.9074 C   0  0  0  0  0  0
    2.0738   -0.4353    0.0875 C   0  0  0  0  0  0
    4.0653   -2.9939    1.3812 C   0  0  0  0  0  0
    0.5237    2.3227    0.3429 C   0  0  0  0  0  0
    6.2122   -5.2355   -0.0941 C   0  0  0  0  0  0
   -1.1963    4.9173    2.1701 C   0  0  0  0  0  0
    9.4373   -3.9362    1.1788 C   0  0  0  0  0  0
   -0.9975   10.1113   -3.4198 C   0  0  0  0  0  0
   -1.7127   10.8645   -3.7586 H   0  0  0  0  0  0
   -0.0011   10.4398   -3.7242 H   0  0  0  0  0  0
   -1.2221    9.1665   -3.9208 H   0  0  0  0  0  0
   -2.5191    9.5788   -1.4502 C   0  0  0  0  0  0
   -3.2356   10.2745   -1.8927 H   0  0  0  0  0  0
   -2.7731    8.5670   -1.7741 H   0  0  0  0  0  0
   -2.6343    9.6447   -0.3694 H   0  0  0  0  0  0
   -9.5557   -3.3848   -2.6366 C   0  0  0  0  0  0
   -9.5118   -4.1075   -3.4546 H   0  0  0  0  0  0
  -10.1373   -3.8234   -1.8220 H   0  0  0  0  0  0
  -10.0830   -2.4967   -2.9907 H   0  0  0  0  0  0
   -4.6159   -2.4131   -3.4902 C   0  0  0  0  0  0
   -3.7216   -1.9046   -3.1239 H   0  0  0  0  0  0
   -4.5186   -3.4808   -3.2831 H   0  0  0  0  0  0
   -4.6816   -2.2647   -4.5697 H   0  0  0  0  0  0
    1.7544    4.5334    0.5089 C   0  0  0  0  0  0
    1.6955    5.4731    1.0646 H   0  0  0  0  0  0
    2.5399    3.9379    0.9816 H   0  0  0  0  0  0
   -8.1706   -1.9784   -0.9937 C   0  0  0  0  0  0
   -8.7308   -1.1037   -1.3375 H   0  0  0  0  0  0
   -8.7251   -2.3826   -0.1452 H   0  0  0  0  0  0
    0.0054    8.9131   -1.3838 C   0  0  0  0  0  0
   -0.2679    7.9208   -1.7535 H   0  0  0  0  0  0
    0.9547    9.1578   -1.8685 H   0  0  0  0  0  0
   -1.0686    9.9446   -1.8738 C   0  0  0  0  0  0
   -0.8359   10.9234   -1.4452 H   0  0  0  0  0  0
   -8.1216   -3.0244   -2.1503 C   0  0  0  0  0  0
    4.0948   -1.5116    1.1980 C   0  0  0  0  0  0
    3.7397   -1.0712    2.1288 H   0  0  0  0  0  0
    1.2709    0.0850    1.2475 C   0  0  0  0  0  0
    1.8062   -0.1245    2.1685 H   0  0  0  0  0  0
    8.5514   -4.3606    0.0663 C   0  0  0  0  0  0
    8.8872   -5.3811   -0.1456 H   0  0  0  0  0  0
    0.3856    3.7881    0.5720 C   0  0  0  0  0  0
   -0.2677    4.1816   -0.2108 H   0  0  0  0  0  0
    4.8250   -5.1959    0.4625 C   0  0  0  0  0  0
    4.9139   -5.5005    1.5098 H   0  0  0  0  0  0
   -1.9021    5.9036    1.2864 C   0  0  0  0  0  0
   -2.5378    6.4912    1.9586 H   0  0  0  0  0  0
    0.3024    8.8348    0.1526 C   0  0  0  0  0  0
    1.2137    8.2417    0.2799 H   0  0  0  0  0  0
    3.8071   -6.1684   -0.2226 C   0  0  0  0  0  0
    3.9128   -6.0707   -1.3080 H   0  0  0  0  0  0
   -2.8840    5.3207    0.2016 C   0  0  0  0  0  0
   -2.3776    5.3497   -0.7684 H   0  0  0  0  0  0
   -7.2090   -2.4912   -3.3099 C   0  0  0  0  0  0
   -6.9885   -3.3338   -3.9723 H   0  0  0  0  0  0
   -7.0924   -3.9586    1.8752 C   0  0  0  0  0  0
   -7.8451   -4.1694    1.1143 H   0  0  0  0  0  0
   -6.4990   -5.3119    2.3632 C   0  0  0  0  0  0
   -7.2452   -5.7905    3.0046 H   0  0  0  0  0  0
   -5.8731   -1.8421   -2.7927 C   0  0  0  0  0  0
   -5.8844   -0.7656   -2.9995 H   0  0  0  0  0  0
   -5.1695   -5.1204    3.1820 C   0  0  0  0  0  0
   -5.3317   -5.5656    4.1679 H   0  0  0  0  0  0
   -5.9765   -3.0585    1.2735 C   0  0  0  0  0  0
   -5.5328   -3.6106    0.4405 H   0  0  0  0  0  0
   -3.9081   -5.8342    2.6136 C   0  0  0  0  0  0
   -3.7290   -5.5338    1.5797 H   0  0  0  0  0  0
   -3.0365   -5.5514    3.2092 H   0  0  0  0  0  0
   -6.7504   -1.5096   -0.5419 C   0  0  0  0  0  0
   -6.7176   -0.4176   -0.6133 H   0  0  0  0  0  0
   -4.8485   -2.8222    2.3297 C   0  0  0  0  0  0
   -4.9568   -1.8263    2.7614 H   0  0  0  0  0  0
    1.7874   10.8839    0.3492 C   0  0  0  0  0  0
    2.6754   10.2663    0.4965 H   0  0  0  0  0  0
    1.7220   11.1844   -0.6974 H   0  0  0  0  0  0
    1.8873   11.7820    0.9591 H   0  0  0  0  0  0
    3.1924    4.3309   -1.4871 N   0  0  0  0  0  0
    3.7433    3.6769   -1.0321 H   0  0  0  0  0  0
    3.4020    4.5947   -2.3970 H   0  0  0  0  0  0
   -0.9283    6.7694    0.6621 N   0  0  0  0  0  0
   -0.3394    6.3733    0.0006 H   0  0  0  0  0  0
    3.2625   -1.0960    0.0969 N   0  0  0  0  0  0
    3.5845   -1.3408   -0.7853 H   0  0  0  0  0  0
    1.1818    1.5334    1.2369 N   0  0  0  0  0  0
    1.6218    1.9960    1.9676 H   0  0  0  0  0  0
    7.1729   -4.4613    0.4735 N   0  0  0  0  0  0
    6.8961   -3.9093    1.2226 H   0  0  0  0  0  0
   -0.2312    4.0205    1.8470 N   0  0  0  0  0  0
    0.0958    3.4892    2.5907 H   0  0  0  0  0  0
    4.3866   -3.8269    0.3562 N   0  0  0  0  0  0
    4.3893   -3.4440   -0.5330 H   0  0  0  0  0  0
   -7.5472   -4.2822   -1.6311 N   0  0  0  0  0  0
   -7.5254   -4.9544   -2.4014 H   0  0  0  0  0  0
   -6.5769   -4.0775   -1.3902 H   0  0  0  0  0  0
    0.5688   10.1639    0.7752 N   0  0  0  0  0  0
   -0.2396   10.7673    0.6048 H   0  0  0  0  0  0
   10.2246   -3.8564   -4.4986 O   0  0  0  0  0  0
   10.4114   -3.3364   -5.3081 H   0  0  0  0  0  0
    9.7052   -0.5867    0.8733 O   0  0  0  0  0  0
   10.2634   -0.9542    0.1550 H   0  0  0  0  0  0
    8.3199   -0.0148   -2.4673 O   0  0  0  0  0  0
    7.8686    0.4587   -1.7356 H   0  0  0  0  0  0
   10.7794   -3.9261    1.0214 O   0  0  0  0  0  0
   11.3395   -3.6510    1.7760 H   0  0  0  0  0  0
   -4.0436   -7.2559    2.6529 O   0  0  0  0  0  0
   -3.1762   -7.6026    2.3476 H   0  0  0  0  0  0
    4.1234   -7.5191    0.1144 O   0  0  0  0  0  0
    3.4484   -8.0675   -0.3421 H   0  0  0  0  0  0
   -4.0223    6.1725    0.0557 O   0  0  0  0  0  0
   -3.6656    7.0678   -0.1344 H   0  0  0  0  0  0
   -7.9022   -1.5342   -4.1190 O   0  0  0  0  0  0
   -8.1155   -0.7853   -3.5219 H   0  0  0  0  0  0
   -7.7588   -3.2882    2.9503 O   0  0  0  0  0  0
   -8.0201   -2.4187    2.5762 H   0  0  0  0  0  0
   -6.3398   -6.1706    1.2277 O   0  0  0  0  0  0
   -5.8091   -6.9214    1.5661 H   0  0  0  0  0  0
    1.4574    5.7147   -1.5090 O   0  0  0  0  0  0
   -1.4389    8.6716    1.7748 O   0  0  0  0  0  0
    1.6079   -0.3298   -1.0685 O   0  0  0  0  0  0
    3.8349   -3.4640    2.5200 O   0  0  0  0  0  0
   -0.0309    1.8264   -0.6641 O   0  0  0  0  0  0
    6.5050   -5.9471   -1.0842 O   0  0  0  0  0  0
   -1.4916    4.8957    3.3868 O   0  0  0  0  0  0
    8.9971   -3.5917    2.2990 O   0  0  0  0  0  0
   -3.6959   -0.0676    1.5794 O   0  0  0  0  0  0
   -1.1912   -4.2111    1.4686 O   0  0  0  0  0  0
   -3.5492   -2.9923    1.7435 O   0  0  0  0  0  0
   -5.6790   -2.0173   -1.3725 O   0  0  0  0  0  0
   -6.5040   -1.7701    0.8577 O   0  0  0  0  0  0
   -4.8999   -3.7254    3.4603 O   0  0  0  0  0  0
   -5.0005    1.8716    3.4857 Cl  0  0  0  0  0  0
    0.2736   -5.7929    3.5752 Cl  0  0  0  0  0  0
  1  2  1  0  0  0
  1 19  1  0  0  0
  1 27  2  0  0  0
  3  4  1  0  0  0
  3 11  1  0  0  0
  3 30  2  0  0  0
  5  6  1  0  0  0
  5 13  1  0  0  0
  5 29  2  0  0  0
  7  8  1  0  0  0
  7 27  1  0  0  0
  7 33  2  0  0  0
  9 10  1  0  0  0
  9 31  2  0  0  0
  9 34  1  0  0  0
 11 12  1  0  0  0
 11 41  2  0  0  0
 13 14  1  0  0  0
 13 40  2  0  0  0
 15 16  1  0  0  0
 15 28  2  0  0  0
 15 37  1  0  0  0
 17 18  1  0  0  0
 17 28  1  0  0  0
 17 38  2  0  0  0
 19 20  1  0  0  0
 19 35  2  0  0  0
 21 22  1  0  0  0
 21 34  2  0  0  0
 21 36  1  0  0  0
 23 24  1  0  0  0
 23 29  1  0  0  0
 23 43  2  0  0  0
 25 26  1  0  0  0
 25 30  1  0  0  0
 25 42  2  0  0  0
 27 80  1  0  0  0
 28 82  1  0  0  0
 29 94  1  0  0  0
 30 96  1  0  0  0
 31 32  1  0  0  0
 31 84  1  0  0  0
 32 33  1  0  0  0
 32 36  2  0  0  0
 33 35  1  0  0  0
 34141  1  0  0  0
 35143  1  0  0  0
 36145  1  0  0  0
 37 39  2  0  0  0
 37170  1  0  0  0
 38 39  1  0  0  0
 38169  1  0  0  0
 39171  1  0  0  0
 40 43  1  0  0  0
 40170  1  0  0  0
 41 42  1  0  0  0
 41169  1  0  0  0
 42175  1  0  0  0
 43176  1  0  0  0
 44 68  1  0  0  0
 44121  1  0  0  0
 44161  2  0  0  0
 45 92  1  0  0  0
 45124  1  0  0  0
 45162  2  0  0  0
 46 82  1  0  0  0
 46126  1  0  0  0
 46163  2  0  0  0
 47 80  1  0  0  0
 47134  1  0  0  0
 47164  2  0  0  0
 48 86  1  0  0  0
 48128  1  0  0  0
 48165  2  0  0  0
 49 88  1  0  0  0
 49130  1  0  0  0
 49166  2  0  0  0
 50 90  1  0  0  0
 50132  1  0  0  0
 50167  2  0  0  0
 51 84  1  0  0  0
 51147  1  0  0  0
 51168  2  0  0  0
 52 53  1  0  0  0
 52 54  1  0  0  0
 52 55  1  0  0  0
 52 77  1  0  0  0
 56 57  1  0  0  0
 56 58  1  0  0  0
 56 59  1  0  0  0
 56 77  1  0  0  0
 60 61  1  0  0  0
 60 62  1  0  0  0
 60 63  1  0  0  0
 60 79  1  0  0  0
 64 65  1  0  0  0
 64 66  1  0  0  0
 64 67  1  0  0  0
 64104  1  0  0  0
 68 69  1  0  0  0
 68 70  1  0  0  0
 68 86  1  0  0  0
 71 72  1  0  0  0
 71 73  1  0  0  0
 71 79  1  0  0  0
 71113  1  0  0  0
 74 75  1  0  0  0
 74 76  1  0  0  0
 74 77  1  0  0  0
 74 92  1  0  0  0
 77 78  1  0  0  0
 79 98  1  0  0  0
 79136  1  0  0  0
 80 81  1  0  0  0
 80126  1  0  0  0
 82 83  1  0  0  0
 82128  1  0  0  0
 84 85  1  0  0  0
 84130  1  0  0  0
 86 87  1  0  0  0
 86132  1  0  0  0
 88 89  1  0  0  0
 88 94  1  0  0  0
 88134  1  0  0  0
 90 91  1  0  0  0
 90 96  1  0  0  0
 90124  1  0  0  0
 92 93  1  0  0  0
 92139  1  0  0  0
 94 95  1  0  0  0
 94151  1  0  0  0
 96 97  1  0  0  0
 96153  1  0  0  0
 98 99  1  0  0  0
 98104  1  0  0  0
 98155  1  0  0  0
100101  1  0  0  0
100102  1  0  0  0
100108  1  0  0  0
100157  1  0  0  0
102103  1  0  0  0
102106  1  0  0  0
102159  1  0  0  0
104105  1  0  0  0
104172  1  0  0  0
106107  1  0  0  0
106110  1  0  0  0
106174  1  0  0  0
108109  1  0  0  0
108115  1  0  0  0
108173  1  0  0  0
110111  1  0  0  0
110112  1  0  0  0
110149  1  0  0  0
113114  1  0  0  0
113172  1  0  0  0
113173  1  0  0  0
115116  1  0  0  0
115171  1  0  0  0
115174  1  0  0  0
117118  1  0  0  0
117119  1  0  0  0
117120  1  0  0  0
117139  1  0  0  0
121122  1  0  0  0
121123  1  0  0  0
124125  1  0  0  0
126127  1  0  0  0
128129  1  0  0  0
130131  1  0  0  0
132133  1  0  0  0
134135  1  0  0  0
136137  1  0  0  0
136138  1  0  0  0
139140  1  0  0  0
141142  1  0  0  0
143144  1  0  0  0
145146  1  0  0  0
147148  1  0  0  0
149150  1  0  0  0
151152  1  0  0  0
153154  1  0  0  0
155156  1  0  0  0
157158  1  0  0  0
159160  1  0  0  0
M  END
$$$$
Molecule-015-Alendronic_acid
  Cerius2 10300711153D 1   1.00000                          
Structure written by Cerius2 SD Exporter
 27 26  0  0  0  0  0  0  0  0999 V2000
    1.7113    0.5699   -0.5112 C   0  0  0  0  0  0
    1.5655    0.8905   -1.5460 H   0  0  0  0  0  0
    1.6412    1.4539    0.1260 H   0  0  0  0  0  0
    0.5981   -0.4512   -0.1266 C   0  0  0  0  0  0
    0.8155   -1.3758   -0.6718 H   0  0  0  0  0  0
    0.6994   -0.6769    0.9408 H   0  0  0  0  0  0
    3.1492    0.0060   -0.3881 C   0  0  0  0  0  0
    3.2616   -0.8846   -1.0104 H   0  0  0  0  0  0
    3.8600    0.7563   -0.7421 H   0  0  0  0  0  0
   -0.8795   -0.0227   -0.4582 C   0  0  0  0  0  0
    3.5013   -0.3326    0.9966 N   0  0  0  0  0  0
    2.8463   -1.0482    1.3181 H   0  0  0  0  0  0
    3.3397    0.5010    1.5665 H   0  0  0  0  0  0
   -0.9479    0.2104   -1.8913 O   0  0  0  0  0  0
   -1.8390    0.5730   -2.1107 H   0  0  0  0  0  0
   -2.8752    1.6793    0.1989 O   0  0  0  0  0  0
   -2.9378    2.5361    0.6669 H   0  0  0  0  0  0
   -1.1763    1.1999    1.9387 O   0  0  0  0  0  0
   -1.4184    2.0980    2.2407 H   0  0  0  0  0  0
   -1.5915   -2.5463   -0.6451 O   0  0  0  0  0  0
   -2.2554   -3.1475   -0.2509 H   0  0  0  0  0  0
   -3.3905   -1.0075   -0.5116 O   0  0  0  0  0  0
   -3.3033   -1.1597   -1.4738 H   0  0  0  0  0  0
   -0.7290    2.4915    0.0500 O   0  0  0  0  0  0
   -1.9972   -1.5111    1.4052 O   0  0  0  0  0  0
   -1.4119    1.2893    0.4289 P   0  0  0  0  0  0
   -1.9603   -1.2093    0.0023 P   0  0  0  0  0  0
  1  2  1  0  0  0
  1  3  1  0  0  0
  1  4  1  0  0  0
  1  7  1  0  0  0
  4  5  1  0  0  0
  4  6  1  0  0  0
  4 10  1  0  0  0
  7  8  1  0  0  0
  7  9  1  0  0  0
  7 11  1  0  0  0
 10 14  1  0  0  0
 10 26  1  0  0  0
 10 27  1  0  0  0
 11 12  1  0  0  0
 11 13  1  0  0  0
 14 15  1  0  0  0
 16 17  1  0  0  0
 16 26  1  0  0  0
 18 19  1  0  0  0
 18 26  1  0  0  0
 20 21  1  0  0  0
 20 27  1  0  0  0
 22 23  1  0  0  0
 22 27  1  0  0  0
 24 26  2  0  0  0
 25 27  2  0  0  0
M  END
$$$$
Molecule-016-Aztreonam
  Cerius2 10300711153D 1   1.00000                          

 45 46  0  0  0  0  0  0  0  0999 V2000
   -3.3845   -0.6265   -1.6606 C   0  0  0  0  0  0
   -4.0341   -0.7378   -0.2628 C   0  0  0  0  0  0
   -4.2358    0.6021    0.5326 C   0  0  0  0  0  0
   -3.7705    0.5809    1.8851 N   0  0  0  0  0  0
   -2.4915    0.4133    2.2979 C   0  0  0  0  0  0
   -2.4264    0.1560    3.5202 O   0  0  0  0  0  0
   -1.3168    0.4886    1.5111 C   0  0  0  0  0  0
   -1.3577    1.3651    0.4736 N   0  0  0  0  0  0
   -0.4143    1.5636   -0.4110 O   0  0  0  0  0  0
   -0.3624    2.5747   -1.4319 C   0  0  0  0  0  0
   -1.6926    2.6812   -2.2331 C   0  0  0  0  0  0
   -0.0554    3.9290   -0.7239 C   0  0  0  0  0  0
    0.7290    2.1412   -2.3515 C   0  0  0  0  0  0
    0.6664    0.9394   -2.9695 O   0  0  0  0  0  0
    1.7360    2.8419   -2.6022 O   0  0  0  0  0  0
   -0.1425   -0.2543    1.8071 C   0  0  0  0  0  0
    0.0167   -1.2650    2.7642 C   0  0  0  0  0  0
    1.5983   -1.9620    2.8542 S   0  0  0  0  0  0
    2.0059   -0.8872    1.5652 C   0  0  0  0  0  0
    3.2264   -0.8483    1.0165 N   0  0  0  0  0  0
    1.0168   -0.0894    1.1481 N   0  0  0  0  0  0
   -5.6607    0.2818    0.4028 C   0  0  0  0  0  0
   -6.7099    0.8472    0.7765 O   0  0  0  0  0  0
   -5.4499   -0.8358   -0.2759 N   0  0  0  0  0  0
   -6.5156   -1.9517   -0.9280 S   0  0  0  0  0  0
   -7.4800   -2.6535    0.2594 O   0  0  0  0  0  0
   -7.4670   -1.2100   -1.9563 O   0  0  0  0  0  0
   -5.6786   -3.0610   -1.6960 O   0  0  0  0  0  0
   -2.3244   -0.3982   -1.5530 H   0  0  0  0  0  0
   -3.4751   -1.5751   -2.1907 H   0  0  0  0  0  0
   -3.8649    0.1534   -2.2544 H   0  0  0  0  0  0
   -3.5806   -1.5379    0.3347 H   0  0  0  0  0  0
   -3.9921    1.5150   -0.0152 H   0  0  0  0  0  0
   -4.4440    0.6199    2.5836 H   0  0  0  0  0  0
   -1.9242    1.7397   -2.7309 H   0  0  0  0  0  0
   -2.5213    2.9306   -1.5687 H   0  0  0  0  0  0
   -1.6205    3.4595   -2.9966 H   0  0  0  0  0  0
    0.8692    3.8548   -0.1470 H   0  0  0  0  0  0
    0.0544    4.7342   -1.4537 H   0  0  0  0  0  0
   -0.8609    4.1949   -0.0364 H   0  0  0  0  0  0
    1.3898    0.6640   -3.5664 H   0  0  0  0  0  0
   -0.7280   -1.6064    3.3704 H   0  0  0  0  0  0
    3.9247   -1.4377    1.3408 H   0  0  0  0  0  0
    3.4104   -0.2283    0.2940 H   0  0  0  0  0  0
   -8.3772   -2.4911   -0.0939 H   0  0  0  0  0  0
  1  2  1  0  0  0
  1 29  1  0  0  0
  1 30  1  0  0  0
  1 31  1  0  0  0
  2  3  1  0  0  0
  2 32  1  0  0  0
  3  4  1  0  0  0
  3 22  1  0  0  0
  3 33  1  0  0  0
  4  5  1  0  0  0
  4 34  1  0  0  0
  5  6  2  0  0  0
  5  7  1  0  0  0
  7  8  2  0  0  0
  7 16  1  0  0  0
  8  9  1  0  0  0
  9 10  1  0  0  0
 10 11  1  0  0  0
 10 12  1  0  0  0
 10 13  1  0  0  0
 11 35  1  0  0  0
 11 36  1  0  0  0
 11 37  1  0  0  0
 12 38  1  0  0  0
 12 39  1  0  0  0
 12 40  1  0  0  0
 13 14  1  0  0  0
 13 15  2  0  0  0
 14 41  1  0  0  0
 16 17  2  0  0  0
 17 18  1  0  0  0
 17 42  1  0  0  0
 18 19  1  0  0  0
 19 20  1  0  0  0
 19 21  2  0  0  0
 20 43  1  0  0  0
 20 44  1  0  0  0
 21 16  1  0  0  0
 22 23  2  0  0  0
 22 24  1  0  0  0
 24  2  1  0  0  0
 24 25  1  0  0  0
 25 26  1  0  0  0
 25 27  2  0  0  0
 25 28  2  0  0  0
 26 45  1  0  0  0
M  END
$$$$
Molecule-017-Ceftriaxone
  Cerius2 10300711153D 1   1.00000                          

 54 57  0  0  0  0  0  0  0  0999 V2000
   -4.3378    2.6215   -0.7691 O   0  0  0  0  0  0
   -5.5824    2.2818   -0.5655 N   0  0  0  0  0  0
   -6.1108    1.3410    0.2642 C   0  0  0  0  0  0
   -5.2885    0.5293    1.0929 C   0  0  0  0  0  0
   -5.7764   -0.3373    1.8550 O   0  0  0  0  0  0
   -3.9380    0.6421    1.1030 N   0  0  0  0  0  0
   -3.0329   -0.1558    1.8757 C   0  0  0  0  0  0
   -2.6174   -1.5356    1.2839 C   0  0  0  0  0  0
   -3.1871   -2.0330   -0.3520 S   0  0  0  0  0  0
   -1.8443   -3.2356   -0.5522 C   0  0  0  0  0  0
   -0.4486   -2.7841   -0.2194 C   0  0  0  0  0  0
   -0.2060   -1.5969    0.5478 C   0  0  0  0  0  0
   -1.3043   -1.0151    1.1251 N   0  0  0  0  0  0
   -1.6252    0.1753    1.6592 C   0  0  0  0  0  0
   -1.0095    1.2468    1.8527 O   0  0  0  0  0  0
    1.0812   -1.0211    0.7261 C   0  0  0  0  0  0
    1.3278   -0.0309    1.6073 O   0  0  0  0  0  0
    2.1127   -1.3692    0.1105 O   0  0  0  0  0  0
    0.6388   -3.6916   -0.7021 C   0  0  0  0  0  0
    1.4876   -4.4619    0.7016 S   0  0  0  0  0  0
    2.7177   -5.2733   -0.2271 C   0  0  0  0  0  0
    3.7985   -4.5335   -0.5807 N   0  0  0  0  0  0
    4.8190   -5.0544   -1.3029 C   0  0  0  0  0  0
    5.7927   -4.3239   -1.5995 O   0  0  0  0  0  0
    4.7455   -6.4041   -1.6946 C   0  0  0  0  0  0
    5.6326   -6.9747   -2.3680 O   0  0  0  0  0  0
    3.6518   -7.1099   -1.3157 N   0  0  0  0  0  0
    2.6640   -6.5930   -0.6088 N   0  0  0  0  0  0
    1.5658   -7.4543   -0.2636 C   0  0  0  0  0  0
   -7.5295    1.2674    0.2037 C   0  0  0  0  0  0
   -8.4105    0.4298    0.9020 C   0  0  0  0  0  0
  -10.0903    0.6484    0.5450 S   0  0  0  0  0  0
   -9.5693    1.8772   -0.5496 C   0  0  0  0  0  0
  -10.4218    2.5930   -1.2929 N   0  0  0  0  0  0
   -8.2471    2.0696   -0.6076 N   0  0  0  0  0  0
   -3.9847    3.6462   -1.6939 C   0  0  0  0  0  0
   -3.2660   -0.1845    2.9437 H   0  0  0  0  0  0
   -2.6684   -2.3491    2.0166 H   0  0  0  0  0  0
   -3.5584    1.3101    0.5195 H   0  0  0  0  0  0
   -2.0786   -4.1145    0.0528 H   0  0  0  0  0  0
   -1.8886   -3.5330   -1.6021 H   0  0  0  0  0  0
    2.2373    0.3196    1.6830 H   0  0  0  0  0  0
    0.2439   -4.5027   -1.3189 H   0  0  0  0  0  0
    1.3338   -3.1413   -1.3364 H   0  0  0  0  0  0
    3.6104   -8.0417   -1.5860 H   0  0  0  0  0  0
    1.6974   -8.4689   -0.6478 H   0  0  0  0  0  0
    1.4704   -7.5225    0.8222 H   0  0  0  0  0  0
    0.6349   -7.0636   -0.6787 H   0  0  0  0  0  0
   -8.1314   -0.2735    1.5814 H   0  0  0  0  0  0
  -11.3760    2.4322   -1.2306 H   0  0  0  0  0  0
  -10.0809    3.2730   -1.8939 H   0  0  0  0  0  0
   -4.3160    3.3758   -2.6979 H   0  0  0  0  0  0
   -4.4460    4.5914   -1.4020 H   0  0  0  0  0  0
   -2.9013    3.7651   -1.6967 H   0  0  0  0  0  0
  1  2  1  0  0  0
  2  3  2  0  0  0
  3  4  1  0  0  0
  3 30  1  0  0  0
  4  5  2  0  0  0
  4  6  1  0  0  0
  6  7  1  0  0  0
  6 39  1  0  0  0
  7  8  1  0  0  0
  8  9  1  0  0  0
  9 10  1  0  0  0
 10 11  1  0  0  0
 10 40  1  0  0  0
 10 41  1  0  0  0
 11 12  2  0  0  0
 11 19  1  0  0  0
 12 13  1  0  0  0
 12 16  1  0  0  0
 13  8  1  0  0  0
 13 14  1  0  0  0
 14  7  1  0  0  0
 14 15  2  0  0  0
 16 17  1  0  0  0
 16 18  2  0  0  0
 17 42  1  0  0  0
 19 20  1  0  0  0
 19 43  1  0  0  0
 19 44  1  0  0  0
 20 21  1  0  0  0
 21 22  2  0  0  0
 22 23  1  0  0  0
 23 24  2  0  0  0
 23 25  1  0  0  0
 25 26  2  0  0  0
 25 27  1  0  0  0
 27 28  1  0  0  0
 27 45  1  0  0  0
 28 21  1  0  0  0
 28 29  1  0  0  0
 29 46  1  0  0  0
 29 47  1  0  0  0
 29 48  1  0  0  0
 30 31  2  0  0  0
 31 32  1  0  0  0
 31 49  1  0  0  0
 32 33  1  0  0  0
 33 34  1  0  0  0
 33 35  2  0  0  0
 34 50  1  0  0  0
 34 51  1  0  0  0
 35 30  1  0  0  0
 36  1  1  0  0  0
 36 52  1  0  0  0
 36 53  1  0  0  0
 36 54  1  0  0  0
 37  7  1  0  0  0
 38  8  1  0  0  0
M  END
$$$$
Molecule-018-Lactulose
  Cerius2 10300711153D 1   1.00000                          

 45 46  0  0  0  0  0  0  0  0999 V2000
   -1.6235    2.2080   -1.0164 O   0  0  0  0  0  0
   -3.0050    1.8628   -0.9170 C   0  0  0  0  0  0
   -3.2748    0.8739    0.2434 C   0  0  0  0  0  0
   -4.6898    0.7540    0.4749 O   0  0  0  0  0  0
   -5.0413   -0.6354    0.5101 C   0  0  0  0  0  0
   -6.1513   -0.8836    1.5702 C   0  0  0  0  0  0
   -7.3705   -0.2020    1.2664 O   0  0  0  0  0  0
   -3.7240   -1.3980    0.7968 C   0  0  0  0  0  0
   -3.7355   -2.7574    0.3492 O   0  0  0  0  0  0
   -2.7016   -0.5485    0.0268 C   0  0  0  0  0  0
   -1.3499   -0.6166    0.5307 O   0  0  0  0  0  0
   -0.6103   -1.8546    0.4122 C   0  0  0  0  0  0
    0.5639   -1.7354    1.2458 O   0  0  0  0  0  0
    1.5837   -0.7962    0.8225 C   0  0  0  0  0  0
    1.2128    0.6770    1.1602 C   0  0  0  0  0  0
    2.3721    1.5032    1.2350 O   0  0  0  0  0  0
    2.0250   -1.0605   -0.6537 C   0  0  0  0  0  0
    2.9071   -0.0430   -1.1373 O   0  0  0  0  0  0
    0.8221   -1.2544   -1.6228 C   0  0  0  0  0  0
    0.1941   -0.0097   -1.9451 O   0  0  0  0  0  0
   -0.2074   -2.2584   -1.0379 C   0  0  0  0  0  0
    0.3427   -3.5815   -1.0319 O   0  0  0  0  0  0
   -3.5620    2.7838   -0.7324 H   0  0  0  0  0  0
   -3.3501    1.4459   -1.8655 H   0  0  0  0  0  0
   -2.8433    1.3008    1.1552 H   0  0  0  0  0  0
   -6.3700   -1.9510    1.6337 H   0  0  0  0  0  0
   -5.8068   -0.5431    2.5489 H   0  0  0  0  0  0
    0.5430    1.0947    0.4099 H   0  0  0  0  0  0
    0.7080    0.7146    2.1276 H   0  0  0  0  0  0
   -1.0921   -2.2885   -1.6751 H   0  0  0  0  0  0
   -1.1335    1.3919   -1.2418 H   0  0  0  0  0  0
   -7.1045    0.7331    1.1239 H   0  0  0  0  0  0
   -4.2860   -3.2440    0.9968 H   0  0  0  0  0  0
    2.8163    1.3439    0.3769 H   0  0  0  0  0  0
    3.0788   -0.2674   -2.0763 H   0  0  0  0  0  0
   -0.4255   -0.2078   -2.6805 H   0  0  0  0  0  0
    0.5033   -3.8155   -1.9718 H   0  0  0  0  0  0
   -5.5290   -0.9496   -0.7968 O   0  0  0  0  0  0
   -5.7427   -1.9057   -0.7702 H   0  0  0  0  0  0
   -1.1915   -2.6715    0.8461 H   0  0  0  0  0  0
    1.2076   -1.6593   -2.5633 H   0  0  0  0  0  0
    2.4461   -1.0273    1.4539 H   0  0  0  0  0  0
    2.5948   -1.9954   -0.6555 H   0  0  0  0  0  0
   -2.7436   -0.7998   -1.0369 H   0  0  0  0  0  0
   -3.4809   -1.3686    1.8641 H   0  0  0  0  0  0
  1  2  1  0  0  0
  1 31  1  0  0  0
  2  3  1  0  0  0
  2 23  1  0  0  0
  2 24  1  0  0  0
  3  4  1  0  0  0
  3 25  1  0  0  0
  4  5  1  0  0  0
  5  6  1  0  0  0
  5  8  1  0  0  0
  6  7  1  0  0  0
  6 26  1  0  0  0
  6 27  1  0  0  0
  7 32  1  0  0  0
  8  9  1  0  0  0
  8 10  1  0  0  0
  9 33  1  0  0  0
 10  3  1  0  0  0
 10 11  1  0  0  0
 11 12  1  0  0  0
 12 13  1  0  0  0
 13 14  1  0  0  0
 14 15  1  0  0  0
 14 17  1  0  0  0
 15 16  1  0  0  0
 15 28  1  0  0  0
 15 29  1  0  0  0
 16 34  1  0  0  0
 17 18  1  0  0  0
 17 19  1  0  0  0
 18 35  1  0  0  0
 19 20  1  0  0  0
 19 21  1  0  0  0
 20 36  1  0  0  0
 21 12  1  0  0  0
 21 22  1  0  0  0
 21 30  1  0  0  0
 22 37  1  0  0  0
 38  5  1  0  0  0
 38 39  1  0  0  0
 40 12  1  0  0  0
 41 19  1  0  0  0
 42 14  1  0  0  0
 43 17  1  0  0  0
 44 10  1  0  0  0
 45  8  1  0  0  0
M  END
$$$$
Molecule-019-Risedronic_acid
  Cerius2 10300711153D 1   1.00000                          
Structure written by Cerius2 SD Exporter
 28 28  0  0  0  0  0  0  0  0999 V2000
    2.9424   -1.4670    0.6664 C   0  0  0  0  0  0
    3.2520   -2.3771    1.0143 H   0  0  0  0  0  0
    1.8117   -1.3655   -0.1643 C   0  0  0  0  0  0
    1.3093   -2.2197   -0.4188 H   0  0  0  0  0  0
    1.3747   -0.1060   -0.6400 C   0  0  0  0  0  0
    3.6424   -0.2981    1.0095 C   0  0  0  0  0  0
    4.4672   -0.3438    1.6111 H   0  0  0  0  0  0
    2.1327    1.0295   -0.2655 C   0  0  0  0  0  0
    1.8751    1.9643   -0.5889 H   0  0  0  0  0  0
    0.1794    0.0162   -1.5286 C   0  0  0  0  0  0
    0.3506    0.8491   -2.2191 H   0  0  0  0  0  0
    0.1415   -0.8686   -2.1731 H   0  0  0  0  0  0
   -1.2320    0.2082   -0.8631 C   0  0  0  0  0  0
    3.2213    0.9005    0.5351 N   0  0  0  0  0  0
   -2.1504    0.3035   -1.9874 O   0  0  0  0  0  0
   -3.0663    0.4269   -1.6373 H   0  0  0  0  0  0
   -3.1604   -0.9697    0.5718 O   0  0  0  0  0  0
   -3.2872   -1.8340    1.0117 H   0  0  0  0  0  0
   -0.8705   -1.2045    1.4395 O   0  0  0  0  0  0
   -1.2212   -2.0446    1.7968 H   0  0  0  0  0  0
   -2.7905    1.8928    0.5189 O   0  0  0  0  0  0
   -2.6893    2.7766    0.9256 H   0  0  0  0  0  0
   -0.5066    1.5691    1.3802 O   0  0  0  0  0  0
   -0.6224    2.4857    1.7012 H   0  0  0  0  0  0
   -1.5820   -2.3035   -0.4919 O   0  0  0  0  0  0
   -0.9291    2.7367   -0.5930 O   0  0  0  0  0  0
   -1.6876   -1.0289    0.1575 P   0  0  0  0  0  0
   -1.3544    1.5589    0.1064 P   0  0  0  0  0  0
  1  2  1  0  0  0
  1  3  1  0  0  0
  1  6  2  0  0  0
  3  4  1  0  0  0
  3  5  2  0  0  0
  5  8  1  0  0  0
  5 10  1  0  0  0
  6  7  1  0  0  0
  6 14  1  0  0  0
  8  9  1  0  0  0
  8 14  2  0  0  0
 10 11  1  0  0  0
 10 12  1  0  0  0
 10 13  1  0  0  0
 13 15  1  0  0  0
 13 27  1  0  0  0
 13 28  1  0  0  0
 15 16  1  0  0  0
 17 18  1  0  0  0
 17 27  1  0  0  0
 19 20  1  0  0  0
 19 27  1  0  0  0
 21 22  1  0  0  0
 21 28  1  0  0  0
 23 24  1  0  0  0
 23 28  1  0  0  0
 25 27  2  0  0  0
 26 28  2  0  0  0
M  END
$$$$
Molecule-020-Streptomycin
  Cerius2 10300711153D 1   1.00000                          

 79 81  0  0  0  0  0  0  0  0999 V2000
   -0.7267   -3.7584   -0.6072 C   0  0  0  0  0  0
   -1.8044   -2.8187   -0.2333 N   0  0  0  0  0  0
   -2.4212   -3.0285    1.1056 C   0  0  0  0  0  0
   -1.6349   -2.3198    2.2487 C   0  0  0  0  0  0
   -1.4240   -0.9318    1.9576 O   0  0  0  0  0  0
   -2.3635   -2.4805    3.6131 C   0  0  0  0  0  0
   -1.6899   -1.6762    4.5836 O   0  0  0  0  0  0
   -3.8728   -2.0939    3.5112 C   0  0  0  0  0  0
   -4.6921   -2.4995    4.7689 C   0  0  0  0  0  0
   -4.1871   -1.9468    5.9885 O   0  0  0  0  0  0
   -4.5043   -2.7622    2.3917 O   0  0  0  0  0  0
   -3.9004   -2.5467    1.0976 C   0  0  0  0  0  0
   -4.0249   -1.1472    0.7373 O   0  0  0  0  0  0
   -4.4579   -0.8479   -0.6175 C   0  0  0  0  0  0
   -4.1649    0.6244   -1.0104 C   0  0  0  0  0  0
   -5.3466    1.1744   -1.6138 O   0  0  0  0  0  0
   -6.2140    0.0897   -1.9618 C   0  0  0  0  0  0
   -5.9378   -0.3763   -3.4176 C   0  0  0  0  0  0
   -5.9857   -0.9737   -0.8487 C   0  0  0  0  0  0
   -6.7823   -0.6611    0.3372 C   0  0  0  0  0  0
   -7.9938   -0.8223    0.3345 O   0  0  0  0  0  0
   -3.0774    0.6730   -1.9619 O   0  0  0  0  0  0
   -2.2938    1.8815   -2.1272 C   0  0  0  0  0  0
   -3.0830    3.1243   -2.6313 C   0  0  0  0  0  0
   -3.7505    2.8043   -3.8549 O   0  0  0  0  0  0
   -2.1406    4.3401   -2.8738 C   0  0  0  0  0  0
   -2.9596    5.4457   -3.2702 O   0  0  0  0  0  0
   -1.2571    4.7122   -1.6352 C   0  0  0  0  0  0
   -0.5042    5.8954   -2.0003 N   0  0  0  0  0  0
    0.8168    6.1781   -1.9989 C   0  0  0  0  0  0
    1.7966    5.4213   -1.4979 N   0  0  0  0  0  0
    1.1870    7.3419   -2.5425 N   0  0  0  0  0  0
   -0.4918    3.4498   -1.1030 C   0  0  0  0  0  0
   -1.4345    2.2243   -0.8700 C   0  0  0  0  0  0
   -0.7832    1.0529   -0.3464 N   0  0  0  0  0  0
   -1.4822    4.0997   -3.7157 H   0  0  0  0  0  0
   -3.8390    3.4010   -1.8913 H   0  0  0  0  0  0
   -7.2425    0.4639   -1.9462 H   0  0  0  0  0  0
   -6.2975   -2.3060   -1.2758 O   0  0  0  0  0  0
   -3.9567   -1.0091    3.3862 H   0  0  0  0  0  0
   -1.5994    1.6202   -2.9290 H   0  0  0  0  0  0
    0.1433    3.7453    0.1442 O   0  0  0  0  0  0
    0.2763    3.1859   -1.8310 H   0  0  0  0  0  0
   -1.9331    5.0335   -0.8369 H   0  0  0  0  0  0
   -2.1202    2.5377   -0.0792 H   0  0  0  0  0  0
   -0.3573   -3.4883   -1.5968 H   0  0  0  0  0  0
    0.1034   -3.7083    0.0992 H   0  0  0  0  0  0
   -1.1064   -4.7812   -0.6494 H   0  0  0  0  0  0
   -1.4047   -1.8777   -0.2396 H   0  0  0  0  0  0
   -2.4510   -4.1015    1.3274 H   0  0  0  0  0  0
   -1.0398   -0.5669    2.7852 H   0  0  0  0  0  0
   -2.2985   -1.6860    5.3477 H   0  0  0  0  0  0
   -5.7234   -2.1619    4.6417 H   0  0  0  0  0  0
   -4.7030   -3.5881    4.8603 H   0  0  0  0  0  0
   -4.7970   -2.2638    6.6913 H   0  0  0  0  0  0
   -3.9525    1.1900   -0.1015 H   0  0  0  0  0  0
   -6.0544    0.4675   -4.1003 H   0  0  0  0  0  0
   -4.9256   -0.7674   -3.5259 H   0  0  0  0  0  0
   -6.6471   -1.1540   -3.7061 H   0  0  0  0  0  0
   -6.3700   -0.2767    1.1534 H   0  0  0  0  0  0
   -4.2396    3.6223   -4.0946 H   0  0  0  0  0  0
   -2.3360    6.1211   -3.6105 H   0  0  0  0  0  0
   -1.0501    6.6294   -2.3206 H   0  0  0  0  0  0
    1.5690    4.6186   -1.0215 H   0  0  0  0  0  0
    2.7203    5.7024   -1.5803 H   0  0  0  0  0  0
    0.5190    7.9330   -2.9182 H   0  0  0  0  0  0
   -1.1249    0.6924    0.4868 H   0  0  0  0  0  0
   -7.2721   -2.3171   -1.3868 H   0  0  0  0  0  0
    0.6116    2.9200    0.4002 H   0  0  0  0  0  0
   -3.9318   -1.4960   -1.3283 H   0  0  0  0  0  0
   -0.6480   -2.7823    2.3370 H   0  0  0  0  0  0
   -2.2879   -3.5263    3.9267 H   0  0  0  0  0  0
   -4.4574   -3.1925    0.4111 H   0  0  0  0  0  0
    0.2151    0.3302   -0.8882 C   0  0  0  0  0  0
    0.8270    0.5706   -2.0526 N   0  0  0  0  0  0
    0.6100   -0.7295   -0.1865 N   0  0  0  0  0  0
    0.5597    1.3155   -2.6025 H   0  0  0  0  0  0
    1.3394   -1.2850   -0.5015 H   0  0  0  0  0  0
    0.1445   -0.9352    0.6321 H   0  0  0  0  0  0
  1  2  1  0  0  0
  1 46  1  0  0  0
  1 47  1  0  0  0
  1 48  1  0  0  0
  2  3  1  0  0  0
  2 49  1  0  0  0
  3  4  1  0  0  0
  3 50  1  0  0  0
  4  5  1  0  0  0
  4  6  1  0  0  0
  5 51  1  0  0  0
  6  7  1  0  0  0
  6  8  1  0  0  0
  7 52  1  0  0  0
  8  9  1  0  0  0
  8 11  1  0  0  0
  9 10  1  0  0  0
  9 53  1  0  0  0
  9 54  1  0  0  0
 10 55  1  0  0  0
 11 12  1  0  0  0
 12  3  1  0  0  0
 12 13  1  0  0  0
 13 14  1  0  0  0
 14 15  1  0  0  0
 15 16  1  0  0  0
 15 22  1  0  0  0
 15 56  1  0  0  0
 16 17  1  0  0  0
 17 18  1  0  0  0
 17 19  1  0  0  0
 18 57  1  0  0  0
 18 58  1  0  0  0
 18 59  1  0  0  0
 19 14  1  0  0  0
 19 20  1  0  0  0
 20 21  2  0  0  0
 20 60  1  0  0  0
 22 23  1  0  0  0
 23 24  1  0  0  0
 24 25  1  0  0  0
 24 26  1  0  0  0
 25 61  1  0  0  0
 26 27  1  0  0  0
 26 28  1  0  0  0
 27 62  1  0  0  0
 28 29  1  0  0  0
 28 33  1  0  0  0
 29 30  1  0  0  0
 29 63  1  0  0  0
 30 31  1  0  0  0
 30 32  2  0  0  0
 31 64  1  0  0  0
 31 65  1  0  0  0
 32 66  1  0  0  0
 33 34  1  0  0  0
 34 23  1  0  0  0
 34 35  1  0  0  0
 35 67  1  0  0  0
 36 26  1  0  0  0
 37 24  1  0  0  0
 38 17  1  0  0  0
 39 19  1  0  0  0
 39 68  1  0  0  0
 40  8  1  0  0  0
 41 23  1  0  0  0
 42 33  1  0  0  0
 42 69  1  0  0  0
 43 33  1  0  0  0
 44 28  1  0  0  0
 45 34  1  0  0  0
 70 14  1  0  0  0
 71  4  1  0  0  0
 72  6  1  0  0  0
 73 12  1  0  0  0
 74 35  1  0  0  0
 75 74  2  0  0  0
 75 77  1  0  0  0
 76 74  1  0  0  0
 76 78  1  0  0  0
 76 79  1  0  0  0
M  END
$$$$
Molecule-021-Acarbose
  Cerius2 10300711153D 1   1.00000                          

 87 89  0  0  0  0  0  0  0  0999 V2000
   -0.0232   -0.3591   -1.3179 C   0  0  0  0  0  0
   -0.2045   -0.7818    0.1606 C   0  0  0  0  0  0
    0.8453   -0.1327    0.9238 O   0  0  0  0  0  0
    0.5485    0.3060    2.2769 C   0  0  0  0  0  0
    1.7017    0.5706    3.1032 O   0  0  0  0  0  0
    2.9995    0.7711    2.4964 C   0  0  0  0  0  0
    3.0730    1.8737    1.3824 C   0  0  0  0  0  0
    2.6480    3.2742    1.8914 C   0  0  0  0  0  0
    2.5628    4.2036    0.8125 O   0  0  0  0  0  0
    4.4014    1.9840    0.8345 O   0  0  0  0  0  0
    5.1226    0.7652    0.5411 C   0  0  0  0  0  0
    5.6347    0.9282   -0.7987 O   0  0  0  0  0  0
    6.8727    0.2450   -1.1296 C   0  0  0  0  0  0
    6.8027   -0.2169   -2.6219 C   0  0  0  0  0  0
    6.8297    0.9090   -3.5040 O   0  0  0  0  0  0
    5.5604   -1.0874   -2.9383 C   0  0  0  0  0  0
    5.5488   -2.2709   -2.1400 O   0  0  0  0  0  0
    8.0793    1.1964   -0.8225 C   0  0  0  0  0  0
    8.0708    1.5827    0.5566 O   0  0  0  0  0  0
    9.4901    0.6256   -1.1488 C   0  0  0  0  0  0
   10.4688    1.5928   -0.7709 O   0  0  0  0  0  0
    9.7690   -0.6132   -0.4509 C   0  0  0  0  0  0
    9.8768   -1.6692   -1.0557 O   0  0  0  0  0  0
    4.3354   -0.5691    0.6974 C   0  0  0  0  0  0
    3.3976   -0.7696   -0.3622 O   0  0  0  0  0  0
    3.6448   -0.5998    2.0860 C   0  0  0  0  0  0
    4.6236   -0.9972    3.0530 O   0  0  0  0  0  0
   -0.3621   -0.7217    2.9978 C   0  0  0  0  0  0
    0.2965   -1.9953    3.0352 O   0  0  0  0  0  0
   -1.7224   -0.8254    2.2431 C   0  0  0  0  0  0
   -2.6383    0.0718    2.8727 O   0  0  0  0  0  0
   -1.6354   -0.4883    0.7145 C   0  0  0  0  0  0
   -2.6863   -1.2459   -0.0212 N   0  0  0  0  0  0
   -3.6303   -0.4683   -0.8725 C   0  0  0  0  0  0
   -4.3037   -1.3924   -1.7818 C   0  0  0  0  0  0
   -5.6206   -1.3657   -2.0904 C   0  0  0  0  0  0
   -6.1855   -2.3477   -3.0221 C   0  0  0  0  0  0
   -6.7059   -1.6992   -4.1817 O   0  0  0  0  0  0
   -6.5277   -0.3715   -1.4951 C   0  0  0  0  0  0
   -7.3232   -1.0254   -0.4986 O   0  0  0  0  0  0
   -5.8152    0.8600   -0.8574 C   0  0  0  0  0  0
   -5.3804    1.7667   -1.8775 O   0  0  0  0  0  0
   -4.5992    0.4043   -0.0103 C   0  0  0  0  0  0
   -5.0430   -0.2870    1.1624 O   0  0  0  0  0  0
   -0.7279   -0.8866   -1.9621 H   0  0  0  0  0  0
    0.9848   -0.5999   -1.6575 H   0  0  0  0  0  0
   -0.1781    0.7161   -1.4268 H   0  0  0  0  0  0
   -0.0268   -1.8603    0.2216 H   0  0  0  0  0  0
    2.4159    1.6312    0.5485 H   0  0  0  0  0  0
    1.6670    3.2255    2.3660 H   0  0  0  0  0  0
    3.3697    3.6443    2.6231 H   0  0  0  0  0  0
    6.9925   -0.6613   -0.5277 H   0  0  0  0  0  0
    5.5805   -1.3827   -3.9896 H   0  0  0  0  0  0
    4.6460   -0.5168   -2.7643 H   0  0  0  0  0  0
    7.9400    2.1115   -1.4062 H   0  0  0  0  0  0
    9.5835    0.4814   -2.2294 H   0  0  0  0  0  0
    9.8664   -0.6157    0.5368 H   0  0  0  0  0  0
    2.8862   -1.3870    2.0704 H   0  0  0  0  0  0
   -0.5267   -0.4014    4.0309 H   0  0  0  0  0  0
   -2.1168   -1.8374    2.3782 H   0  0  0  0  0  0
   -3.0523    0.2024   -1.5168 H   0  0  0  0  0  0
   -3.7247   -2.0737   -2.2196 H   0  0  0  0  0  0
   -5.4493   -3.0836   -3.3581 H   0  0  0  0  0  0
   -6.9914   -2.8992   -2.5331 H   0  0  0  0  0  0
   -7.2070    0.0182   -2.2600 H   0  0  0  0  0  0
   -4.0685    1.2938    0.3375 H   0  0  0  0  0  0
    3.4539    4.1899    0.3958 H   0  0  0  0  0  0
    6.8235    0.5385   -4.4126 H   0  0  0  0  0  0
    4.7332   -2.7519   -2.3986 H   0  0  0  0  0  0
    8.7719    2.2652    0.6361 H   0  0  0  0  0  0
   11.3302    1.1994   -1.0242 H   0  0  0  0  0  0
    2.5592   -0.4045   -0.0345 H   0  0  0  0  0  0
    4.1342   -1.0759    3.8988 H   0  0  0  0  0  0
   -0.3065   -2.5955    3.5215 H   0  0  0  0  0  0
   -3.4709   -0.0460    2.3773 H   0  0  0  0  0  0
   -2.2114   -1.9268   -0.6186 H   0  0  0  0  0  0
   -7.0667   -2.4154   -4.7494 H   0  0  0  0  0  0
   -7.8814   -1.6699   -0.9839 H   0  0  0  0  0  0
   -4.9525    2.5109   -1.4005 H   0  0  0  0  0  0
   -5.7524   -0.8769    0.8338 H   0  0  0  0  0  0
   -6.5230    1.3961   -0.2181 H   0  0  0  0  0  0
   -1.7836    0.5913    0.6065 H   0  0  0  0  0  0
    0.0151    1.2590    2.2087 H   0  0  0  0  0  0
    3.6117    1.1640    3.3138 H   0  0  0  0  0  0
    5.0355   -1.4052    0.6334 H   0  0  0  0  0  0
    5.9293    0.7445    1.2777 H   0  0  0  0  0  0
    7.6789   -0.8315   -2.8436 H   0  0  0  0  0  0
  1  2  1  0  0  0
  1 45  1  0  0  0
  1 46  1  0  0  0
  1 47  1  0  0  0
  2  3  1  0  0  0
  2 48  1  0  0  0
  3  4  1  0  0  0
  4  5  1  0  0  0
  4 28  1  0  0  0
  5  6  1  0  0  0
  6  7  1  0  0  0
  7  8  1  0  0  0
  7 10  1  0  0  0
  7 49  1  0  0  0
  8  9  1  0  0  0
  8 50  1  0  0  0
  8 51  1  0  0  0
  9 67  1  0  0  0
 10 11  1  0  0  0
 11 12  1  0  0  0
 11 24  1  0  0  0
 12 13  1  0  0  0
 13 14  1  0  0  0
 13 18  1  0  0  0
 13 52  1  0  0  0
 14 15  1  0  0  0
 14 16  1  0  0  0
 15 68  1  0  0  0
 16 17  1  0  0  0
 16 53  1  0  0  0
 16 54  1  0  0  0
 17 69  1  0  0  0
 18 19  1  0  0  0
 18 20  1  0  0  0
 18 55  1  0  0  0
 19 70  1  0  0  0
 20 21  1  0  0  0
 20 22  1  0  0  0
 20 56  1  0  0  0
 21 71  1  0  0  0
 22 23  2  0  0  0
 22 57  1  0  0  0
 24 25  1  0  0  0
 24 26  1  0  0  0
 25 72  1  0  0  0
 26  6  1  0  0  0
 26 27  1  0  0  0
 26 58  1  0  0  0
 27 73  1  0  0  0
 28 29  1  0  0  0
 28 30  1  0  0  0
 28 59  1  0  0  0
 29 74  1  0  0  0
 30 31  1  0  0  0
 30 32  1  0  0  0
 30 60  1  0  0  0
 31 75  1  0  0  0
 32  2  1  0  0  0
 32 33  1  0  0  0
 33 34  1  0  0  0
 33 76  1  0  0  0
 34 35  1  0  0  0
 34 61  1  0  0  0
 35 36  2  0  0  0
 35 62  1  0  0  0
 36 37  1  0  0  0
 36 39  1  0  0  0
 37 38  1  0  0  0
 37 63  1  0  0  0
 37 64  1  0  0  0
 38 77  1  0  0  0
 39 40  1  0  0  0
 39 41  1  0  0  0
 39 65  1  0  0  0
 40 78  1  0  0  0
 41 42  1  0  0  0
 41 43  1  0  0  0
 42 79  1  0  0  0
 43 34  1  0  0  0
 43 44  1  0  0  0
 43 66  1  0  0  0
 44 80  1  0  0  0
 81 41  1  0  0  0
 82 32  1  0  0  0
 83  4  1  0  0  0
 84  6  1  0  0  0
 85 24  1  0  0  0
 86 11  1  0  0  0
 87 14  1  0  0  0
M  END
$$$$
Molecule-022-Amphotericin B
  Cerius2 10300711153D 1   1.00000                          

138140  0  0  0  0  0  0  0  0999 V2000
   10.4015    7.6965    1.8938 C   0  0  0  0  0  0
    9.5631    7.6058    3.1910 C   0  0  0  0  0  0
    8.4540    6.7054    2.9323 O   0  0  0  0  0  0
    7.8711    5.9838    4.0486 C   0  0  0  0  0  0
    8.4655    4.6709    4.1972 O   0  0  0  0  0  0
    8.3119    3.7503    3.0949 C   0  0  0  0  0  0
    8.1793    2.3049    3.6826 C   0  0  0  0  0  0
    8.4077    1.1479    2.6633 C   0  0  0  0  0  0
    7.7157    1.4908    1.4319 O   0  0  0  0  0  0
    7.8900    0.5621    0.3395 C   0  0  0  0  0  0
    9.3006    0.4761    0.1269 O   0  0  0  0  0  0
    7.2874   -0.8335    0.7263 C   0  0  0  0  0  0
    6.9389   -0.9435    2.2427 C   0  0  0  0  0  0
    5.6858   -0.2934    2.4702 O   0  0  0  0  0  0
    8.0156   -0.2948    3.1718 C   0  0  0  0  0  0
    9.1905   -1.2022    3.2984 C   0  0  0  0  0  0
    9.4125   -1.8298    4.3576 O   0  0  0  0  0  0
   10.0555   -1.3884    2.2760 O   0  0  0  0  0  0
    7.2301    1.2274   -0.9097 C   0  0  0  0  0  0
    7.4733    0.5806   -2.3097 C   0  0  0  0  0  0
    6.8893   -0.7173   -2.3724 O   0  0  0  0  0  0
    8.9664    0.4999   -2.7492 C   0  0  0  0  0  0
    9.1978    0.2733   -4.2705 C   0  0  0  0  0  0
    8.7429   -1.0290   -4.6514 O   0  0  0  0  0  0
   10.6653    0.5140   -4.7545 C   0  0  0  0  0  0
   11.0086    1.8936   -4.5996 O   0  0  0  0  0  0
   11.7891   -0.3932   -4.1526 C   0  0  0  0  0  0
   12.4283    0.0673   -2.8044 C   0  0  0  0  0  0
   13.6044   -0.8120   -2.2781 C   0  0  0  0  0  0
   13.1759   -2.1672   -2.1373 O   0  0  0  0  0  0
   14.9017   -0.7318   -3.1405 C   0  0  0  0  0  0
   16.2061   -1.2440   -2.4588 C   0  0  0  0  0  0
   16.2323   -2.7710   -2.1499 C   0  0  0  0  0  0
   17.5831   -3.2410   -1.7754 C   0  0  0  0  0  0
   18.2397   -4.1168   -2.5863 O   0  0  0  0  0  0
   19.5843   -4.6158   -2.4293 C   0  0  0  0  0  0
   19.7112   -5.8855   -3.3091 C   0  0  0  0  0  0
   20.6544   -3.4960   -2.7318 C   0  0  0  0  0  0
   20.4886   -2.9578   -4.1884 C   0  0  0  0  0  0
   22.1399   -3.9093   -2.3839 C   0  0  0  0  0  0
   22.1276   -4.7589   -1.2288 O   0  0  0  0  0  0
   23.2063   -2.7842   -2.0927 C   0  0  0  0  0  0
   23.8589   -2.1193   -3.3397 C   0  0  0  0  0  0
   22.8263   -1.8820   -0.9581 C   0  0  0  0  0  0
   22.0045   -0.7372   -0.9381 C   0  0  0  0  0  0
   21.4865   -0.0381   -2.0419 C   0  0  0  0  0  0
   20.4270    0.8879   -2.0203 C   0  0  0  0  0  0
   19.6249    1.2082   -0.9095 C   0  0  0  0  0  0
   18.4659    1.9924   -1.0335 C   0  0  0  0  0  0
   17.5830    2.1981    0.0401 C   0  0  0  0  0  0
   16.3253    2.7984   -0.1359 C   0  0  0  0  0  0
   15.3855    2.8923    0.9041 C   0  0  0  0  0  0
   14.0789    3.3600    0.6892 C   0  0  0  0  0  0
   13.1047    3.3648    1.7016 C   0  0  0  0  0  0
   11.7762    3.7439    1.4502 C   0  0  0  0  0  0
   10.7693    3.6561    2.4253 C   0  0  0  0  0  0
    9.4264    3.9404    2.1305 C   0  0  0  0  0  0
    8.0114    6.7553    5.3873 C   0  0  0  0  0  0
    7.3294    6.0571    6.4348 O   0  0  0  0  0  0
    9.5159    7.0362    5.7126 C   0  0  0  0  0  0
   10.0887    5.9773    6.5632 N   0  0  0  0  0  0
   10.4094    7.1990    4.4362 C   0  0  0  0  0  0
   11.4438    8.1590    4.6794 O   0  0  0  0  0  0
    9.7644    7.9917    1.0586 H   0  0  0  0  0  0
   11.1936    8.4394    2.0000 H   0  0  0  0  0  0
   10.8535    6.7320    1.6619 H   0  0  0  0  0  0
    9.1442    8.5993    3.3792 H   0  0  0  0  0  0
    7.3757    3.9425    2.5562 H   0  0  0  0  0  0
    8.8916    2.1833    4.5037 H   0  0  0  0  0  0
    7.1772    2.2108    4.1093 H   0  0  0  0  0  0
    9.4836    1.1750    2.4642 H   0  0  0  0  0  0
    9.5895    1.4153    0.1272 H   0  0  0  0  0  0
    6.3734   -1.0345    0.1630 H   0  0  0  0  0  0
    7.9947   -1.6228    0.4594 H   0  0  0  0  0  0
    6.7895   -1.9968    2.5075 H   0  0  0  0  0  0
    5.8411    0.6318    2.1813 H   0  0  0  0  0  0
    7.5648   -0.2165    4.1666 H   0  0  0  0  0  0
    9.9186   -0.8942    1.4478 H   0  0  0  0  0  0
    6.1496    1.2753   -0.7417 H   0  0  0  0  0  0
    7.5804    2.2627   -0.9629 H   0  0  0  0  0  0
    6.9390    1.2057   -3.0304 H   0  0  0  0  0  0
    7.1942   -1.0638   -3.2356 H   0  0  0  0  0  0
    9.4670    1.4270   -2.4557 H   0  0  0  0  0  0
    9.4266   -0.3327   -2.2158 H   0  0  0  0  0  0
    8.5710    0.9836   -4.8171 H   0  0  0  0  0  0
    9.2962   -1.6623   -4.1453 H   0  0  0  0  0  0
   10.6552    0.3233   -5.8330 H   0  0  0  0  0  0
   10.3612    2.3901   -5.1433 H   0  0  0  0  0  0
   11.4053   -1.4093   -4.0434 H   0  0  0  0  0  0
   12.5928   -0.4334   -4.8927 H   0  0  0  0  0  0
   12.7882    1.0941   -2.9079 H   0  0  0  0  0  0
   11.6658    0.0770   -2.0271 H   0  0  0  0  0  0
   13.0047   -2.4905   -3.0473 H   0  0  0  0  0  0
   14.7514   -1.2839   -4.0718 H   0  0  0  0  0  0
   15.0731    0.3144   -3.4109 H   0  0  0  0  0  0
   15.5499   -3.0008   -1.3292 H   0  0  0  0  0  0
   15.8973   -3.3231   -3.0312 H   0  0  0  0  0  0
   19.6812   -4.9404   -1.3879 H   0  0  0  0  0  0
   20.7022   -6.3307   -3.2076 H   0  0  0  0  0  0
   18.9725   -6.6257   -2.9947 H   0  0  0  0  0  0
   19.5329   -5.6518   -4.3598 H   0  0  0  0  0  0
   20.9191   -1.9675   -4.2946 H   0  0  0  0  0  0
   19.4358   -2.8623   -4.4592 H   0  0  0  0  0  0
   20.9660   -3.6250   -4.9079 H   0  0  0  0  0  0
   22.5180   -4.5301   -3.2020 H   0  0  0  0  0  0
   23.0454   -5.0883   -1.1236 H   0  0  0  0  0  0
   24.0673   -3.3331   -1.6882 H   0  0  0  0  0  0
   23.1316   -1.7353   -4.0433 H   0  0  0  0  0  0
   24.5152   -1.3011   -3.0347 H   0  0  0  0  0  0
   24.4645   -2.8514   -3.8801 H   0  0  0  0  0  0
   23.1418   -2.1895   -0.0308 H   0  0  0  0  0  0
   21.7536   -0.4019   -0.0068 H   0  0  0  0  0  0
   21.8851   -0.2182   -2.9574 H   0  0  0  0  0  0
   20.1927    1.3241   -2.9174 H   0  0  0  0  0  0
   19.8509    0.8214    0.0082 H   0  0  0  0  0  0
   18.2260    2.3785   -1.9516 H   0  0  0  0  0  0
   17.8427    1.8501    0.9682 H   0  0  0  0  0  0
   16.0667    3.1376   -1.0670 H   0  0  0  0  0  0
   15.6491    2.5754    1.8419 H   0  0  0  0  0  0
   13.8169    3.6780   -0.2489 H   0  0  0  0  0  0
   13.3633    3.0519    2.6428 H   0  0  0  0  0  0
   11.5256    4.0674    0.5102 H   0  0  0  0  0  0
   11.0102    3.3417    3.3688 H   0  0  0  0  0  0
    9.1883    4.2835    1.1948 H   0  0  0  0  0  0
    7.4987    7.7145    5.2608 H   0  0  0  0  0  0
    7.3943    6.6369    7.2241 H   0  0  0  0  0  0
    9.5578    7.9620    6.2941 H   0  0  0  0  0  0
    9.5533    5.9616    7.4339 H   0  0  0  0  0  0
    9.8856    5.0971    6.0834 H   0  0  0  0  0  0
   10.8888    6.2422    4.2033 H   0  0  0  0  0  0
   11.9524    7.8019    5.4402 H   0  0  0  0  0  0
   20.3910   -2.6757   -2.0661 H   0  0  0  0  0  0
   18.1178   -2.8170   -0.7224 O   0  0  0  0  0  0
   16.4368   -0.4961   -1.2635 O   0  0  0  0  0  0
   17.2008   -0.9391   -0.8418 H   0  0  0  0  0  0
   17.0316   -1.0211   -3.1445 H   0  0  0  0  0  0
   13.8415   -0.4503   -1.2724 H   0  0  0  0  0  0
    6.8004    5.8666    3.8518 H   0  0  0  0  0  0
  1  2  1  0  0  0
  1 64  1  0  0  0
  1 65  1  0  0  0
  1 66  1  0  0  0
  2  3  1  0  0  0
  2 67  1  0  0  0
  3  4  1  0  0  0
  4  5  1  0  0  0
  4 58  1  0  0  0
  5  6  1  0  0  0
  6  7  1  0  0  0
  6 68  1  0  0  0
  7  8  1  0  0  0
  7 69  1  0  0  0
  7 70  1  0  0  0
  8  9  1  0  0  0
  8 71  1  0  0  0
  9 10  1  0  0  0
 10 11  1  0  0  0
 10 12  1  0  0  0
 10 19  1  0  0  0
 11 72  1  0  0  0
 12 13  1  0  0  0
 12 73  1  0  0  0
 12 74  1  0  0  0
 13 14  1  0  0  0
 13 15  1  0  0  0
 13 75  1  0  0  0
 14 76  1  0  0  0
 15  8  1  0  0  0
 15 16  1  0  0  0
 15 77  1  0  0  0
 16 17  2  0  0  0
 16 18  1  0  0  0
 18 78  1  0  0  0
 19 20  1  0  0  0
 19 79  1  0  0  0
 19 80  1  0  0  0
 20 21  1  0  0  0
 20 22  1  0  0  0
 20 81  1  0  0  0
 21 82  1  0  0  0
 22 23  1  0  0  0
 22 83  1  0  0  0
 22 84  1  0  0  0
 23 24  1  0  0  0
 23 25  1  0  0  0
 23 85  1  0  0  0
 24 86  1  0  0  0
 25 26  1  0  0  0
 25 27  1  0  0  0
 25 87  1  0  0  0
 26 88  1  0  0  0
 27 28  1  0  0  0
 27 89  1  0  0  0
 27 90  1  0  0  0
 28 29  1  0  0  0
 28 91  1  0  0  0
 28 92  1  0  0  0
 29 30  1  0  0  0
 29 31  1  0  0  0
 30 93  1  0  0  0
 31 32  1  0  0  0
 31 94  1  0  0  0
 31 95  1  0  0  0
 32 33  1  0  0  0
 32136  1  0  0  0
 33 34  1  0  0  0
 33 96  1  0  0  0
 33 97  1  0  0  0
 34 35  1  0  0  0
 35 36  1  0  0  0
 36 37  1  0  0  0
 36 38  1  0  0  0
 36 98  1  0  0  0
 37 99  1  0  0  0
 37100  1  0  0  0
 37101  1  0  0  0
 38 39  1  0  0  0
 38 40  1  0  0  0
 39102  1  0  0  0
 39103  1  0  0  0
 39104  1  0  0  0
 40 41  1  0  0  0
 40 42  1  0  0  0
 40105  1  0  0  0
 41106  1  0  0  0
 42 43  1  0  0  0
 42 44  1  0  0  0
 42107  1  0  0  0
 43108  1  0  0  0
 43109  1  0  0  0
 43110  1  0  0  0
 44 45  2  0  0  0
 44111  1  0  0  0
 45 46  1  0  0  0
 45112  1  0  0  0
 46 47  2  0  0  0
 46113  1  0  0  0
 47 48  1  0  0  0
 47114  1  0  0  0
 48 49  2  0  0  0
 48115  1  0  0  0
 49 50  1  0  0  0
 49116  1  0  0  0
 50 51  2  0  0  0
 50117  1  0  0  0
 51 52  1  0  0  0
 51118  1  0  0  0
 52 53  2  0  0  0
 52119  1  0  0  0
 53 54  1  0  0  0
 53120  1  0  0  0
 54 55  2  0  0  0
 54121  1  0  0  0
 55 56  1  0  0  0
 55122  1  0  0  0
 56 57  2  0  0  0
 56123  1  0  0  0
 57  6  1  0  0  0
 57124  1  0  0  0
 58 59  1  0  0  0
 58 60  1  0  0  0
 58125  1  0  0  0
 59126  1  0  0  0
 60 61  1  0  0  0
 60 62  1  0  0  0
 60127  1  0  0  0
 61128  1  0  0  0
 61129  1  0  0  0
 62  2  1  0  0  0
 62 63  1  0  0  0
 62130  1  0  0  0
 63131  1  0  0  0
132 38  1  0  0  0
133 34  2  0  0  0
134 32  1  0  0  0
134135  1  0  0  0
137 29  1  0  0  0
138  4  1  0  0  0
M  END
$$$$
Molecule-023-Clodronate
  Cerius2 10300711153D 1   1.00000                          
Structure written by Cerius2 SD Exporter
 15 14  0  0  0  0  0  0  0  0999 V2000
   -0.0667    1.1433   -0.0078 C   0  0  0  0  0  0
   -1.3701   -0.8523    1.2247 O   0  0  0  0  0  0
   -2.2320   -1.3002    1.1092 H   0  0  0  0  0  0
   -1.3670   -0.8581   -1.2341 O   0  0  0  0  0  0
   -2.2292   -1.3055   -1.1186 H   0  0  0  0  0  0
    1.4813   -0.6669    1.2279 O   0  0  0  0  0  0
    2.3942   -0.9995    1.1143 H   0  0  0  0  0  0
    1.4844   -0.6727   -1.2309 O   0  0  0  0  0  0
    2.3970   -1.0048   -1.1135 H   0  0  0  0  0  0
   -2.5822    0.7103   -0.0099 O   0  0  0  0  0  0
    2.4836    1.0396   -0.0043 O   0  0  0  0  0  0
   -1.3061    0.0549   -0.0068 P   0  0  0  0  0  0
    1.3031    0.2245   -0.0039 P   0  0  0  0  0  0
   -0.1324    2.1776   -1.4379 Cl  0  0  0  0  0  0
   -0.1360    2.1844    1.4173 Cl  0  0  0  0  0  0
  1 12  1  0  0  0
  1 13  1  0  0  0
  1 14  1  0  0  0
  1 15  1  0  0  0
  2  3  1  0  0  0
  2 12  1  0  0  0
  4  5  1  0  0  0
  4 12  1  0  0  0
  6  7  1  0  0  0
  6 13  1  0  0  0
  8  9  1  0  0  0
  8 13  1  0  0  0
 10 12  2  0  0  0
 11 13  2  0  0  0
M  END
$$$$
Molecule-024-Nedocromil
  Cerius2 10300711153D 1   1.00000                          
Structure written by Cerius2 SD Exporter
 44 46  0  0  0  0  0  0  0  0999 V2000
    0.3947    2.8267    0.6460 C   0  0  0  0  0  0
    0.4412    3.8426    0.7712 H   0  0  0  0  0  0
   -0.8571    2.1729    0.6405 C   0  0  0  0  0  0
    0.2675    0.0096    0.4381 C   0  0  0  0  0  0
    1.5886    2.1021    0.4939 C   0  0  0  0  0  0
   -0.9497    0.7710    0.3746 C   0  0  0  0  0  0
    1.5137    0.6926    0.4222 C   0  0  0  0  0  0
   -3.2629    2.2369    0.9674 C   0  0  0  0  0  0
   -4.0891    2.7553    1.2824 H   0  0  0  0  0  0
    4.0379    1.9514    0.3865 C   0  0  0  0  0  0
    4.9504    2.4153    0.3653 H   0  0  0  0  0  0
   -3.3487    0.8850    0.5777 C   0  0  0  0  0  0
    3.9404    0.5482    0.3485 C   0  0  0  0  0  0
   -2.0341    2.8989    0.9171 C   0  0  0  0  0  0
    2.8626    2.7187    0.4625 C   0  0  0  0  0  0
   -4.6051    0.2508    0.7368 C   0  0  0  0  0  0
    5.0506   -0.3083    0.2866 C   0  0  0  0  0  0
    0.7603   -3.8690   -0.1320 C   0  0  0  0  0  0
    1.1358   -4.4511   -0.9760 H   0  0  0  0  0  0
    1.3762   -4.0883    0.7425 H   0  0  0  0  0  0
   -0.2679   -4.1753    0.0708 H   0  0  0  0  0  0
   -1.7886   -0.3283   -2.3319 C   0  0  0  0  0  0
   -1.9545   -1.1106   -3.0755 H   0  0  0  0  0  0
   -2.2754    0.5867   -2.6757 H   0  0  0  0  0  0
   -0.7170   -0.1429   -2.2633 H   0  0  0  0  0  0
    0.3102   -1.4675    0.7037 C   0  0  0  0  0  0
   -0.6595   -1.8190    1.0558 H   0  0  0  0  0  0
    0.9739   -1.6328    1.5581 H   0  0  0  0  0  0
    0.8188   -2.3611   -0.4674 C   0  0  0  0  0  0
    1.8535   -2.1124   -0.7088 H   0  0  0  0  0  0
    0.2278   -2.1893   -1.3655 H   0  0  0  0  0  0
   -2.3823   -0.7604   -0.9664 C   0  0  0  0  0  0
   -3.4292   -0.9631   -1.2000 H   0  0  0  0  0  0
   -1.9861   -1.7244   -0.6710 H   0  0  0  0  0  0
   -2.2128    0.2708    0.0660 N   0  0  0  0  0  0
   -5.7750    0.9295    0.7228 O   0  0  0  0  0  0
   -6.6119    0.4363    0.8520 H   0  0  0  0  0  0
    4.8803   -1.6473    0.2413 O   0  0  0  0  0  0
    5.6659   -2.2274    0.1974 H   0  0  0  0  0  0
   -2.0206    4.1254    1.1787 O   0  0  0  0  0  0
    2.9842    3.9653    0.5097 O   0  0  0  0  0  0
   -4.7001   -0.9805    0.9392 O   0  0  0  0  0  0
    6.2294    0.1133    0.2697 O   0  0  0  0  0  0
    2.6902   -0.0006    0.3711 O   0  0  0  0  0  0
  1  2  1  0  0  0
  1  3  1  0  0  0
  1  5  2  0  0  0
  3  6  2  0  0  0
  3 14  1  0  0  0
  4  6  1  0  0  0
  4  7  2  0  0  0
  4 26  1  0  0  0
  5  7  1  0  0  0
  5 15  1  0  0  0
  6 35  1  0  0  0
  7 44  1  0  0  0
  8  9  1  0  0  0
  8 12  2  0  0  0
  8 14  1  0  0  0
 10 11  1  0  0  0
 10 13  2  0  0  0
 10 15  1  0  0  0
 12 16  1  0  0  0
 12 35  1  0  0  0
 13 17  1  0  0  0
 13 44  1  0  0  0
 14 40  2  0  0  0
 15 41  2  0  0  0
 16 36  1  0  0  0
 16 42  2  0  0  0
 17 38  1  0  0  0
 17 43  2  0  0  0
 18 19  1  0  0  0
 18 20  1  0  0  0
 18 21  1  0  0  0
 18 29  1  0  0  0
 22 23  1  0  0  0
 22 24  1  0  0  0
 22 25  1  0  0  0
 22 32  1  0  0  0
 26 27  1  0  0  0
 26 28  1  0  0  0
 26 29  1  0  0  0
 29 30  1  0  0  0
 29 31  1  0  0  0
 32 33  1  0  0  0
 32 34  1  0  0  0
 32 35  1  0  0  0
 36 37  1  0  0  0
 38 39  1  0  0  0
M  END
$$$$
Molecule-025-Neomycin
  Cerius2 10300711153D 1   1.00000                          

 88 91  0  0  0  0  0  0  0  0999 V2000
    6.8975    5.5964   -2.0486 N   0  0  0  0  0  0
    6.0270    4.4886   -1.6322 C   0  0  0  0  0  0
    6.7985    3.1373   -1.5504 C   0  0  0  0  0  0
    5.9152    1.9905   -1.6811 O   0  0  0  0  0  0
    5.1309    1.6107   -0.5263 C   0  0  0  0  0  0
    4.1508    2.6511   -0.3084 O   0  0  0  0  0  0
    2.9718    2.3650    0.4784 C   0  0  0  0  0  0
    2.9527    3.0416    1.8595 C   0  0  0  0  0  0
    3.4659    2.4388    2.6092 H   0  0  0  0  0  0
    1.4375    3.0954    2.1432 C   0  0  0  0  0  0
    1.0287    1.8410    2.7344 O   0  0  0  0  0  0
   -0.3053    1.7581    3.2978 C   0  0  0  0  0  0
   -1.3725    1.4390    2.1931 C   0  0  0  0  0  0
   -0.8794    0.4932    1.2352 O   0  0  0  0  0  0
   -2.6769    0.8907    2.8390 C   0  0  0  0  0  0
   -3.7462    0.7395    1.8409 N   0  0  0  0  0  0
   -2.4309   -0.4490    3.6015 C   0  0  0  0  0  0
   -0.9766   -0.6185    4.1430 C   0  0  0  0  0  0
   -0.9821   -1.5469    5.2888 N   0  0  0  0  0  0
   -0.3202    0.7469    4.5077 C   0  0  0  0  0  0
    1.0217    0.4801    4.9926 O   0  0  0  0  0  0
    1.4449    1.0434    6.2498 C   0  0  0  0  0  0
    0.5376    0.6161    7.2900 O   0  0  0  0  0  0
    0.9277    0.9779    8.6353 C   0  0  0  0  0  0
   -0.1512    0.3892    9.5845 C   0  0  0  0  0  0
    0.2578    0.4398   10.9952 N   0  0  0  0  0  0
    1.0886    2.5280    8.7608 C   0  0  0  0  0  0
    2.0507    3.0694    7.6646 C   0  0  0  0  0  0
    2.1060    4.4992    7.7126 O   0  0  0  0  0  0
    1.6048    2.5939    6.2520 C   0  0  0  0  0  0
    0.6410    3.0526    6.0218 H   0  0  0  0  0  0
    0.7763    3.2715    0.8860 O   0  0  0  0  0  0
    1.7293    3.0259   -0.1621 C   0  0  0  0  0  0
    1.0948    2.1855   -1.2942 C   0  0  0  0  0  0
    0.0117    2.8953   -1.8901 O   0  0  0  0  0  0
    6.0814    1.3207    0.6733 C   0  0  0  0  0  0
    5.3637    0.8695    1.8790 N   0  0  0  0  0  0
    6.9588    2.5699    0.9613 C   0  0  0  0  0  0
    7.8642    2.2786    2.0298 O   0  0  0  0  0  0
    7.7478    2.9784   -0.3174 C   0  0  0  0  0  0
    8.5460    4.1464   -0.0917 O   0  0  0  0  0  0
    3.0604    2.6935    7.8604 H   0  0  0  0  0  0
    2.5657    3.0381    5.2288 N   0  0  0  0  0  0
    2.4272    0.5950    6.4323 H   0  0  0  0  0  0
   -0.9478    1.1723    5.3009 H   0  0  0  0  0  0
   -0.3641   -1.0851    3.3648 H   0  0  0  0  0  0
   -3.0332    1.6387    3.5549 H   0  0  0  0  0  0
   -1.6021    2.3615    1.6513 H   0  0  0  0  0  0
    3.5424    4.3506    1.8388 O   0  0  0  0  0  0
    1.2172    3.9376    2.8060 H   0  0  0  0  0  0
    1.5839    2.8904   10.0530 O   0  0  0  0  0  0
   -0.5714    2.7297    3.7298 H   0  0  0  0  0  0
    2.7930    1.2890    0.5982 H   0  0  0  0  0  0
    4.6272    0.6819   -0.8100 H   0  0  0  0  0  0
    8.4443    2.1657   -0.5463 H   0  0  0  0  0  0
    6.3165    3.3955    1.2805 H   0  0  0  0  0  0
    7.4304    3.1000   -2.4424 H   0  0  0  0  0  0
    6.7444    0.4987    0.3848 H   0  0  0  0  0  0
    2.0160    3.9981   -0.5786 H   0  0  0  0  0  0
    5.5862    4.7427   -0.6675 H   0  0  0  0  0  0
    5.2220    4.4030   -2.3650 H   0  0  0  0  0  0
   -3.1445   -0.5017    4.4294 H   0  0  0  0  0  0
   -2.6421   -1.2958    2.9419 H   0  0  0  0  0  0
   -1.0917    0.9309    9.4609 H   0  0  0  0  0  0
   -0.3295   -0.6581    9.3297 H   0  0  0  0  0  0
    1.8402    1.9728   -2.0642 H   0  0  0  0  0  0
    0.7224    1.2416   -0.8909 H   0  0  0  0  0  0
    2.7014    4.0424    5.3692 H   0  0  0  0  0  0
    3.4600    2.5855    5.4257 H   0  0  0  0  0  0
    3.4376    4.6890    2.7530 H   0  0  0  0  0  0
    1.5048    3.8674   10.1043 H   0  0  0  0  0  0
    6.3683    6.4619   -1.9207 H   0  0  0  0  0  0
    7.6632    5.6105   -1.3750 H   0  0  0  0  0  0
   -1.5746    0.4422    0.5451 H   0  0  0  0  0  0
   -3.4511    0.0086    1.1902 H   0  0  0  0  0  0
   -4.5728    0.3863    2.3289 H   0  0  0  0  0  0
   -0.0105   -1.6369    5.5971 H   0  0  0  0  0  0
   -1.4847   -1.0884    6.0516 H   0  0  0  0  0  0
   -0.5743    0.2716   11.5658 H   0  0  0  0  0  0
    0.5594    1.3982   11.1703 H   0  0  0  0  0  0
    2.5756    4.7161    8.5471 H   0  0  0  0  0  0
   -0.3685    2.2836   -2.5555 H   0  0  0  0  0  0
    4.9402   -0.0356    1.6633 H   0  0  0  0  0  0
    6.0723    0.6986    2.5978 H   0  0  0  0  0  0
    8.1879    3.1506    2.3431 H   0  0  0  0  0  0
    9.1676    3.8994    0.6260 H   0  0  0  0  0  0
    0.1082    2.9955    8.6263 H   0  0  0  0  0  0
    1.8815    0.4948    8.8748 H   0  0  0  0  0  0
  1  2  1  0  0  0
  1 72  1  0  0  0
  1 73  1  0  0  0
  2  3  1  0  0  0
  2 60  1  0  0  0
  2 61  1  0  0  0
  3  4  1  0  0  0
  4  5  1  0  0  0
  5  6  1  0  0  0
  5 36  1  0  0  0
  6  7  1  0  0  0
  7  8  1  0  0  0
  8  9  1  0  0  0
  8 10  1  0  0  0
 10 11  1  0  0  0
 10 32  1  0  0  0
 11 12  1  0  0  0
 12 13  1  0  0  0
 13 14  1  0  0  0
 13 15  1  0  0  0
 14 74  1  0  0  0
 15 16  1  0  0  0
 15 17  1  0  0  0
 16 75  1  0  0  0
 16 76  1  0  0  0
 17 18  1  0  0  0
 17 62  1  0  0  0
 17 63  1  0  0  0
 18 19  1  0  0  0
 18 20  1  0  0  0
 19 77  1  0  0  0
 19 78  1  0  0  0
 20 12  1  0  0  0
 20 21  1  0  0  0
 21 22  1  0  0  0
 22 23  1  0  0  0
 23 24  1  0  0  0
 24 25  1  0  0  0
 24 27  1  0  0  0
 25 26  1  0  0  0
 25 64  1  0  0  0
 25 65  1  0  0  0
 26 79  1  0  0  0
 26 80  1  0  0  0
 27 28  1  0  0  0
 28 29  1  0  0  0
 28 30  1  0  0  0
 29 81  1  0  0  0
 30 22  1  0  0  0
 30 31  1  0  0  0
 32 33  1  0  0  0
 33  7  1  0  0  0
 33 34  1  0  0  0
 34 35  1  0  0  0
 34 66  1  0  0  0
 34 67  1  0  0  0
 35 82  1  0  0  0
 36 37  1  0  0  0
 36 38  1  0  0  0
 37 83  1  0  0  0
 37 84  1  0  0  0
 38 39  1  0  0  0
 38 40  1  0  0  0
 39 85  1  0  0  0
 40  3  1  0  0  0
 40 41  1  0  0  0
 41 86  1  0  0  0
 42 28  1  0  0  0
 43 30  1  0  0  0
 43 68  1  0  0  0
 43 69  1  0  0  0
 44 22  1  0  0  0
 45 20  1  0  0  0
 46 18  1  0  0  0
 47 15  1  0  0  0
 48 13  1  0  0  0
 49  8  1  0  0  0
 49 70  1  0  0  0
 50 10  1  0  0  0
 51 27  1  0  0  0
 51 71  1  0  0  0
 52 12  1  0  0  0
 53  7  1  0  0  0
 54  5  1  0  0  0
 55 40  1  0  0  0
 56 38  1  0  0  0
 57  3  1  0  0  0
 58 36  1  0  0  0
 59 33  1  0  0  0
 87 27  1  0  0  0
 88 24  1  0  0  0
M  END
$$$$
Molecule-026-Amygdalin
  Cerius2 10300711153D 1   1.00000                          
Structure written by Cerius2 SD Exporter
 59 61  0  0  0  0  0  0  0  0999 V2000
  -12.1907    1.4805    3.8563 C   0  0  0  0  0  0
  -11.5795    0.1453   -0.9042 C   0  0  0  0  0  0
  -11.6734   -0.2723   -1.8332 H   0  0  0  0  0  0
  -11.2803   -0.6650    0.2048 C   0  0  0  0  0  0
  -11.1543   -1.6726    0.0821 H   0  0  0  0  0  0
  -11.7503    1.5302   -0.7344 C   0  0  0  0  0  0
  -11.9672    2.1197   -1.5417 H   0  0  0  0  0  0
  -11.1546   -0.0899    1.4830 C   0  0  0  0  0  0
  -10.9348   -0.6963    2.2777 H   0  0  0  0  0  0
  -11.6230    2.1052    0.5445 C   0  0  0  0  0  0
  -11.7485    3.1156    0.6424 H   0  0  0  0  0  0
  -11.3287    1.3042    1.6754 C   0  0  0  0  0  0
   -5.9090    2.7449    3.8067 C   0  0  0  0  0  0
   -5.8642    2.4684    4.8646 H   0  0  0  0  0  0
   -3.8990   -0.8581   -1.4035 C   0  0  0  0  0  0
   -4.2744   -1.2818   -2.3396 H   0  0  0  0  0  0
   -6.9145    3.9189    3.6494 C   0  0  0  0  0  0
   -6.8468    4.3065    2.6284 H   0  0  0  0  0  0
   -4.0077   -1.9353   -0.2883 C   0  0  0  0  0  0
   -3.3701   -2.7864   -0.5470 H   0  0  0  0  0  0
   -3.5792   -1.3897    1.1089 C   0  0  0  0  0  0
   -4.1196   -1.9580    1.8694 H   0  0  0  0  0  0
   -8.3822    3.4758    3.9212 C   0  0  0  0  0  0
   -8.4917    3.2752    4.9904 H   0  0  0  0  0  0
  -11.1858    1.9147    3.0326 C   0  0  0  0  0  0
  -11.2913    3.0019    2.9966 H   0  0  0  0  0  0
   -6.3900    1.5158    2.9805 C   0  0  0  0  0  0
   -6.4005    1.7837    1.9214 H   0  0  0  0  0  0
   -4.6772    0.4498   -1.0181 C   0  0  0  0  0  0
   -4.0792    1.3159   -1.3188 H   0  0  0  0  0  0
   -6.0472    0.5764   -1.7367 C   0  0  0  0  0  0
   -5.9176    0.4991   -2.8183 H   0  0  0  0  0  0
   -6.7120   -0.2256   -1.4086 H   0  0  0  0  0  0
   -5.4938    0.2617    3.1559 C   0  0  0  0  0  0
   -5.9770   -0.5978    2.6815 H   0  0  0  0  0  0
   -5.4176    0.0343    4.2210 H   0  0  0  0  0  0
   -3.8801    0.1329    1.2780 C   0  0  0  0  0  0
   -2.9767    0.6957    1.0195 H   0  0  0  0  0  0
   -8.7279    2.1667    3.1499 C   0  0  0  0  0  0
   -8.7920    2.3625    2.0726 H   0  0  0  0  0  0
  -13.0360    1.1207    4.5459 N   0  0  0  0  0  0
   -6.6812    1.8252   -1.4561 O   0  0  0  0  0  0
   -6.0696    2.5152   -1.7919 H   0  0  0  0  0  0
   -6.5422    4.9727    4.5391 O   0  0  0  0  0  0
   -5.5906    5.1294    4.3497 H   0  0  0  0  0  0
   -5.3541   -2.4221   -0.2265 O   0  0  0  0  0  0
   -5.5096   -2.8891   -1.0761 H   0  0  0  0  0  0
   -4.6027    3.1793    3.4136 O   0  0  0  0  0  0
   -4.6245    3.2487    2.4349 H   0  0  0  0  0  0
   -2.5156   -0.5608   -1.6125 O   0  0  0  0  0  0
   -2.4770    0.0238   -2.4003 H   0  0  0  0  0  0
   -2.1873   -1.6298    1.3408 O   0  0  0  0  0  0
   -2.0162   -1.3034    2.2516 H   0  0  0  0  0  0
   -9.2901    4.5299    3.5800 O   0  0  0  0  0  0
   -9.1056    4.7628    2.6455 H   0  0  0  0  0  0
   -9.9333    1.5550    3.6556 O   0  0  0  0  0  0
   -7.7277    1.1562    3.3873 O   0  0  0  0  0  0
   -4.9397    0.5680    0.4006 O   0  0  0  0  0  0
   -4.1505    0.4627    2.6593 O   0  0  0  0  0  0
  1 25  1  0  0  0
  1 41  3  0  0  0
  2  3  1  0  0  0
  2  4  1  0  0  0
  2  6  2  0  0  0
  4  5  1  0  0  0
  4  8  2  0  0  0
  6  7  1  0  0  0
  6 10  1  0  0  0
  8  9  1  0  0  0
  8 12  1  0  0  0
 10 11  1  0  0  0
 10 12  2  0  0  0
 12 25  1  0  0  0
 13 14  1  0  0  0
 13 17  1  0  0  0
 13 27  1  0  0  0
 13 48  1  0  0  0
 15 16  1  0  0  0
 15 19  1  0  0  0
 15 29  1  0  0  0
 15 50  1  0  0  0
 17 18  1  0  0  0
 17 23  1  0  0  0
 17 44  1  0  0  0
 19 20  1  0  0  0
 19 21  1  0  0  0
 19 46  1  0  0  0
 21 22  1  0  0  0
 21 37  1  0  0  0
 21 52  1  0  0  0
 23 24  1  0  0  0
 23 39  1  0  0  0
 23 54  1  0  0  0
 25 26  1  0  0  0
 25 56  1  0  0  0
 27 28  1  0  0  0
 27 34  1  0  0  0
 27 57  1  0  0  0
 29 30  1  0  0  0
 29 31  1  0  0  0
 29 58  1  0  0  0
 31 32  1  0  0  0
 31 33  1  0  0  0
 31 42  1  0  0  0
 34 35  1  0  0  0
 34 36  1  0  0  0
 34 59  1  0  0  0
 37 38  1  0  0  0
 37 58  1  0  0  0
 37 59  1  0  0  0
 39 40  1  0  0  0
 39 56  1  0  0  0
 39 57  1  0  0  0
 42 43  1  0  0  0
 44 45  1  0  0  0
 46 47  1  0  0  0
 48 49  1  0  0  0
 50 51  1  0  0  0
 52 53  1  0  0  0
 54 55  1  0  0  0
M  END
$$$$
Molecule-027-Cefotaxime
  Cerius2 10300711153D 1   1.00000                          

 47 49  0  0  0  0  0  0  0  0999 V2000
    7.6230   -3.3099   -1.9407 C   0  0  0  0  0  0
    7.4978   -1.8994   -1.5750 C   0  0  0  0  0  0
    6.1836   -3.4069   -1.3532 C   0  0  0  0  0  0
    6.2673   -2.0204   -1.0499 N   0  0  0  0  0  0
    5.3755   -1.2247   -0.3824 C   0  0  0  0  0  0
    4.3152   -1.9022    0.3013 C   0  0  0  0  0  0
    4.3355   -3.3922    0.5050 C   0  0  0  0  0  0
    5.8971   -4.2656    0.2059 S   0  0  0  0  0  0
    8.3205   -0.9629   -1.6707 O   0  0  0  0  0  0
    8.6584   -3.9976   -1.2280 N   0  0  0  0  0  0
    9.0673   -5.2714   -1.4437 C   0  0  0  0  0  0
   10.0721   -5.8887   -0.6488 C   0  0  0  0  0  0
    8.5108   -5.8821   -2.3856 O   0  0  0  0  0  0
   10.5485   -7.2169   -0.8252 C   0  0  0  0  0  0
   10.6738   -5.2319    0.3805 N   0  0  0  0  0  0
   10.4925   -4.0177    0.8260 O   0  0  0  0  0  0
   11.2307   -3.5098    1.9335 C   0  0  0  0  0  0
   10.1755   -8.1810   -1.7722 C   0  0  0  0  0  0
   10.9974   -9.7002   -1.6557 S   0  0  0  0  0  0
   11.8390   -9.0006   -0.3209 C   0  0  0  0  0  0
   11.4995   -7.7410   -0.0266 N   0  0  0  0  0  0
    5.5323    0.1876   -0.3818 C   0  0  0  0  0  0
    6.4086    0.8316   -1.1789 O   0  0  0  0  0  0
    4.8756    0.9706    0.3407 O   0  0  0  0  0  0
    3.1349   -1.1760    0.8614 C   0  0  0  0  0  0
    2.0213   -2.0295    1.1692 O   0  0  0  0  0  0
    0.8301   -1.6326    1.6902 C   0  0  0  0  0  0
   -0.2163   -2.6271    1.9513 C   0  0  0  0  0  0
    0.6060   -0.4285    1.9536 O   0  0  0  0  0  0
   12.7682   -9.6646    0.3772 N   0  0  0  0  0  0
    4.0759   -3.6149    1.5421 H   0  0  0  0  0  0
    3.5715   -3.8405   -0.1341 H   0  0  0  0  0  0
   12.2995   -3.5278    1.7132 H   0  0  0  0  0  0
   11.0329   -4.1103    2.8228 H   0  0  0  0  0  0
   10.9236   -2.4814    2.1235 H   0  0  0  0  0  0
    9.4768   -8.0457   -2.4986 H   0  0  0  0  0  0
    3.4418   -0.6601    1.7748 H   0  0  0  0  0  0
    2.7806   -0.4416    0.1330 H   0  0  0  0  0  0
   -1.1066   -2.3834    1.3702 H   0  0  0  0  0  0
    0.1241   -3.6254    1.6726 H   0  0  0  0  0  0
   -0.4681   -2.6241    3.0126 H   0  0  0  0  0  0
    9.0901   -3.5266   -0.5052 H   0  0  0  0  0  0
    6.4722    1.8061   -1.1312 H   0  0  0  0  0  0
   12.9945  -10.5775    0.1416 H   0  0  0  0  0  0
   13.2139   -9.2287    1.1195 H   0  0  0  0  0  0
    5.4247   -3.6346   -2.1105 H   0  0  0  0  0  0
    7.6677   -3.4257   -3.0273 H   0  0  0  0  0  0
  1  2  1  0  0  0
  1 10  1  0  0  0
  2  4  1  0  0  0
  2  9  2  0  0  0
  3  1  1  0  0  0
  3  4  1  0  0  0
  3  8  1  0  0  0
  4  5  1  0  0  0
  5  6  2  0  0  0
  5 22  1  0  0  0
  6  7  1  0  0  0
  6 25  1  0  0  0
  7  8  1  0  0  0
  7 31  1  0  0  0
  7 32  1  0  0  0
 10 11  1  0  0  0
 10 42  1  0  0  0
 11 12  1  0  0  0
 11 13  2  0  0  0
 12 14  1  0  0  0
 12 15  2  0  0  0
 14 18  2  0  0  0
 15 16  1  0  0  0
 16 17  1  0  0  0
 17 33  1  0  0  0
 17 34  1  0  0  0
 17 35  1  0  0  0
 18 19  1  0  0  0
 18 36  1  0  0  0
 19 20  1  0  0  0
 20 21  2  0  0  0
 20 30  1  0  0  0
 21 14  1  0  0  0
 22 23  1  0  0  0
 22 24  2  0  0  0
 23 43  1  0  0  0
 25 26  1  0  0  0
 25 37  1  0  0  0
 25 38  1  0  0  0
 26 27  1  0  0  0
 27 28  1  0  0  0
 27 29  2  0  0  0
 28 39  1  0  0  0
 28 40  1  0  0  0
 28 41  1  0  0  0
 30 44  1  0  0  0
 30 45  1  0  0  0
 46  3  1  0  0  0
 47  1  1  0  0  0
M  END
$$$$
Molecule-028-Chlorhexidine
  Cerius2 10300711153D 1   1.00000                          
Structure written by Cerius2 SD Exporter
 58 59  0  0  0  0  0  0  0  0999 V2000
    9.2384    1.3208   -0.1069 C   0  0  0  0  0  0
    8.5851    2.0979   -0.2088 H   0  0  0  0  0  0
    9.7173   -1.0462    0.1568 C   0  0  0  0  0  0
    9.4105   -2.0205    0.2222 H   0  0  0  0  0  0
   -9.2467    1.2565   -0.0298 C   0  0  0  0  0  0
   -8.5992    2.0445   -0.0004 H   0  0  0  0  0  0
   -9.7081   -1.1282   -0.0733 C   0  0  0  0  0  0
   -9.3942   -2.1021   -0.0484 H   0  0  0  0  0  0
   11.0914   -0.7596    0.2624 C   0  0  0  0  0  0
   11.7578   -1.5233    0.4011 H   0  0  0  0  0  0
   10.6124    1.6108   -0.0051 C   0  0  0  0  0  0
   10.9288    2.5822   -0.0589 H   0  0  0  0  0  0
  -10.6227    1.5258   -0.1575 C   0  0  0  0  0  0
  -10.9463    2.4956   -0.1936 H   0  0  0  0  0  0
  -11.0843   -0.8627   -0.2045 C   0  0  0  0  0  0
  -11.7450   -1.6408   -0.2716 H   0  0  0  0  0  0
    8.7725   -0.0153   -0.0449 C   0  0  0  0  0  0
   -8.7710   -0.0761    0.0318 C   0  0  0  0  0  0
   11.5430    0.5707    0.1770 C   0  0  0  0  0  0
  -11.5457    0.4665   -0.2423 C   0  0  0  0  0  0
    6.4367    0.1981   -0.7744 C   0  0  0  0  0  0
   -6.4371    0.2209    0.7377 C   0  0  0  0  0  0
    4.0240   -0.0955   -1.1012 C   0  0  0  0  0  0
   -4.0224   -0.0236    1.0895 C   0  0  0  0  0  0
    0.7647   -0.8006    0.1854 C   0  0  0  0  0  0
    1.0088    0.1198    0.7239 H   0  0  0  0  0  0
    1.0054   -1.6475    0.8347 H   0  0  0  0  0  0
   -0.7576   -0.8207   -0.1277 C   0  0  0  0  0  0
   -1.0082    0.0441   -0.7489 H   0  0  0  0  0  0
   -0.9917   -1.7259   -0.6957 H   0  0  0  0  0  0
    1.6450   -0.8813   -1.0876 C   0  0  0  0  0  0
    1.4118   -1.8006   -1.6305 H   0  0  0  0  0  0
    1.4091   -0.0401   -1.7424 H   0  0  0  0  0  0
   -1.6376   -0.7898    1.1476 C   0  0  0  0  0  0
   -1.3980   -1.6532    1.7732 H   0  0  0  0  0  0
   -1.4082    0.1101    1.7218 H   0  0  0  0  0  0
    6.5930    1.2818   -1.5525 N   0  0  0  0  0  0
    5.8183    1.6459   -1.9972 H   0  0  0  0  0  0
   -6.6016    1.3706    1.4124 N   0  0  0  0  0  0
   -5.8297    1.7799    1.8212 H   0  0  0  0  0  0
    3.8065    0.9599   -1.9064 N   0  0  0  0  0  0
    2.9199    1.1475   -2.2425 H   0  0  0  0  0  0
   -3.8130    1.1032    1.7938 N   0  0  0  0  0  0
   -2.9280    1.3275    2.1110 H   0  0  0  0  0  0
    7.4685   -0.3898   -0.1263 N   0  0  0  0  0  0
    7.2488   -1.2181    0.3247 H   0  0  0  0  0  0
   -7.4644   -0.4320    0.1471 N   0  0  0  0  0  0
   -7.2384   -1.2968   -0.2255 H   0  0  0  0  0  0
    5.2406   -0.4097   -0.5998 N   0  0  0  0  0  0
    5.2543   -1.1881   -0.0273 H   0  0  0  0  0  0
   -5.2365   -0.3918    0.6196 N   0  0  0  0  0  0
   -5.2442   -1.2198    0.1214 H   0  0  0  0  0  0
    3.0311   -0.9333   -0.7280 N   0  0  0  0  0  0
    3.2902   -1.6645   -0.1465 H   0  0  0  0  0  0
   -3.0232   -0.8849    0.7949 N   0  0  0  0  0  0
   -3.2767   -1.6685    0.2834 H   0  0  0  0  0  0
   13.1953    0.9179    0.2996 Cl  0  0  0  0  0  0
  -13.2004    0.7888   -0.3960 Cl  0  0  0  0  0  0
  1  2  1  0  0  0
  1 11  1  0  0  0
  1 17  2  0  0  0
  3  4  1  0  0  0
  3  9  2  0  0  0
  3 17  1  0  0  0
  5  6  1  0  0  0
  5 13  1  0  0  0
  5 18  2  0  0  0
  7  8  1  0  0  0
  7 15  2  0  0  0
  7 18  1  0  0  0
  9 10  1  0  0  0
  9 19  1  0  0  0
 11 12  1  0  0  0
 11 19  2  0  0  0
 13 14  1  0  0  0
 13 20  2  0  0  0
 15 16  1  0  0  0
 15 20  1  0  0  0
 17 45  1  0  0  0
 18 47  1  0  0  0
 19 57  1  0  0  0
 20 58  1  0  0  0
 21 37  2  0  0  0
 21 45  1  0  0  0
 21 49  1  0  0  0
 22 39  2  0  0  0
 22 47  1  0  0  0
 22 51  1  0  0  0
 23 41  2  0  0  0
 23 49  1  0  0  0
 23 53  1  0  0  0
 24 43  2  0  0  0
 24 51  1  0  0  0
 24 55  1  0  0  0
 25 26  1  0  0  0
 25 27  1  0  0  0
 25 28  1  0  0  0
 25 31  1  0  0  0
 28 29  1  0  0  0
 28 30  1  0  0  0
 28 34  1  0  0  0
 31 32  1  0  0  0
 31 33  1  0  0  0
 31 53  1  0  0  0
 34 35  1  0  0  0
 34 36  1  0  0  0
 34 55  1  0  0  0
 37 38  1  0  0  0
 39 40  1  0  0  0
 41 42  1  0  0  0
 43 44  1  0  0  0
 45 46  1  0  0  0
 47 48  1  0  0  0
 49 50  1  0  0  0
 51 52  1  0  0  0
 53 54  1  0  0  0
 55 56  1  0  0  0
M  END
$$$$
Molecule-029-Diatrizoate
  Cerius2 10300711153D 1   1.00000                          
Structure written by Cerius2 SD Exporter
 29 29  0  0  0  0  0  0  0  0999 V2000
   -0.0396    2.0130    0.4757 C   0  0  0  0  0  0
    1.1957    1.3189    0.4235 C   0  0  0  0  0  0
   -1.2545    1.2834    0.5285 C   0  0  0  0  0  0
    0.0021   -0.8175    0.4760 C   0  0  0  0  0  0
    1.2130   -0.0969    0.4022 C   0  0  0  0  0  0
   -1.2303   -0.1319    0.5173 C   0  0  0  0  0  0
   -3.2419   -0.9827   -0.4785 C   0  0  0  0  0  0
    3.1913   -0.8421   -0.7424 C   0  0  0  0  0  0
   -0.0547    3.4155    0.4835 C   0  0  0  0  0  0
   -4.4483   -1.8098   -0.3357 C   0  0  0  0  0  0
   -4.4315   -2.6089   -1.0779 H   0  0  0  0  0  0
   -4.5081   -2.2566    0.6582 H   0  0  0  0  0  0
   -5.3339   -1.1930   -0.4954 H   0  0  0  0  0  0
    4.4223   -1.6448   -0.7041 C   0  0  0  0  0  0
    5.2837   -0.9975   -0.8745 H   0  0  0  0  0  0
    4.5440   -2.1414    0.2602 H   0  0  0  0  0  0
    4.3870   -2.4046   -1.4862 H   0  0  0  0  0  0
    2.9888    2.3454    0.4752 I   0  0  0  0  0  0
   -3.0759    2.2549    0.6302 I   0  0  0  0  0  0
    0.0311   -2.8810    0.4868 I   0  0  0  0  0  0
   -2.3701   -0.8614    0.5508 N   0  0  0  0  0  0
   -2.5519   -1.3702    1.3560 H   0  0  0  0  0  0
    2.3697   -0.7977    0.3333 N   0  0  0  0  0  0
    2.6015   -1.3505    1.0956 H   0  0  0  0  0  0
    0.4780    4.1233   -0.5346 O   0  0  0  0  0  0
    0.4520    5.1014   -0.4971 H   0  0  0  0  0  0
   -3.0448   -0.4108   -1.5764 O   0  0  0  0  0  0
    2.9250   -0.2201   -1.7976 O   0  0  0  0  0  0
   -0.5561    4.0573    1.4325 O   0  0  0  0  0  0
  1  2  1  0  0  0
  1  3  2  0  0  0
  1  9  1  0  0  0
  2  5  2  0  0  0
  2 18  1  0  0  0
  3  6  1  0  0  0
  3 19  1  0  0  0
  4  5  1  0  0  0
  4  6  2  0  0  0
  4 20  1  0  0  0
  5 23  1  0  0  0
  6 21  1  0  0  0
  7 10  1  0  0  0
  7 21  1  0  0  0
  7 27  2  0  0  0
  8 14  1  0  0  0
  8 23  1  0  0  0
  8 28  2  0  0  0
  9 25  1  0  0  0
  9 29  2  0  0  0
 10 11  1  0  0  0
 10 12  1  0  0  0
 10 13  1  0  0  0
 14 15  1  0  0  0
 14 16  1  0  0  0
 14 17  1  0  0  0
 21 22  1  0  0  0
 23 24  1  0  0  0
 25 26  1  0  0  0
M  END
$$$$
Molecule-030-Edetic_acid
  Cerius2 10300711153D 1   1.00000                          
Structure written by Cerius2 SD Exporter
 36 35  0  0  0  0  0  0  0  0999 V2000
    3.4956   -1.8023    0.9370 C   0  0  0  0  0  0
   -3.4928   -1.8055   -0.9508 C   0  0  0  0  0  0
    2.8795    2.1136   -0.5434 C   0  0  0  0  0  0
   -2.8893    2.0994    0.5636 C   0  0  0  0  0  0
    2.3174   -1.6062    0.0699 C   0  0  0  0  0  0
    2.5014   -2.0529   -0.9117 H   0  0  0  0  0  0
    1.5127   -2.1768    0.5368 H   0  0  0  0  0  0
    2.9237    0.6683   -0.8485 C   0  0  0  0  0  0
    2.7890    0.5347   -1.9251 H   0  0  0  0  0  0
    3.9421    0.3573   -0.6090 H   0  0  0  0  0  0
   -2.3152   -1.6130   -0.0820 C   0  0  0  0  0  0
   -2.4978   -2.0689    0.8957 H   0  0  0  0  0  0
   -1.5087   -2.1770   -0.5539 H   0  0  0  0  0  0
   -2.9289    0.6513    0.8561 C   0  0  0  0  0  0
   -2.7938    0.5088    1.9315 H   0  0  0  0  0  0
   -3.9463    0.3392    0.6139 H   0  0  0  0  0  0
    0.5043   -0.0020   -0.5874 C   0  0  0  0  0  0
    0.2612   -0.7826   -1.3131 H   0  0  0  0  0  0
    0.3650    0.9493   -1.1106 H   0  0  0  0  0  0
   -0.5073   -0.0088    0.5892 C   0  0  0  0  0  0
   -0.2617   -0.7949    1.3081 H   0  0  0  0  0  0
   -0.3711    0.9384    1.1208 H   0  0  0  0  0  0
    1.9185   -0.1649   -0.0979 N   0  0  0  0  0  0
   -1.9210   -0.1720    0.0983 N   0  0  0  0  0  0
    3.5051   -1.3756    2.2178 O   0  0  0  0  0  0
    4.3060   -1.5232    2.7611 H   0  0  0  0  0  0
   -3.5036   -1.3676   -2.2278 O   0  0  0  0  0  0
   -4.3041   -1.5131   -2.7724 H   0  0  0  0  0  0
    3.7047    2.9612   -1.1930 O   0  0  0  0  0  0
    3.6689    3.9162   -0.9778 H   0  0  0  0  0  0
   -3.7173    2.9386    1.2206 O   0  0  0  0  0  0
   -3.6846    3.8955    1.0137 H   0  0  0  0  0  0
    4.5211   -2.3770    0.5100 O   0  0  0  0  0  0
   -4.5164   -2.3871   -0.5289 O   0  0  0  0  0  0
    2.1095    2.6069    0.3102 O   0  0  0  0  0  0
   -2.1210    2.6027   -0.2856 O   0  0  0  0  0  0
  1  5  1  0  0  0
  1 25  1  0  0  0
  1 33  2  0  0  0
  2 11  1  0  0  0
  2 27  1  0  0  0
  2 34  2  0  0  0
  3  8  1  0  0  0
  3 29  1  0  0  0
  3 35  2  0  0  0
  4 14  1  0  0  0
  4 31  1  0  0  0
  4 36  2  0  0  0
  5  6  1  0  0  0
  5  7  1  0  0  0
  5 23  1  0  0  0
  8  9  1  0  0  0
  8 10  1  0  0  0
  8 23  1  0  0  0
 11 12  1  0  0  0
 11 13  1  0  0  0
 11 24  1  0  0  0
 14 15  1  0  0  0
 14 16  1  0  0  0
 14 24  1  0  0  0
 17 18  1  0  0  0
 17 19  1  0  0  0
 17 20  1  0  0  0
 17 23  1  0  0  0
 20 21  1  0  0  0
 20 22  1  0  0  0
 20 24  1  0  0  0
 25 26  1  0  0  0
 27 28  1  0  0  0
 29 30  1  0  0  0
 31 32  1  0  0  0
M  END
$$$$
Molecule-031-Etidronate
  Cerius2 10300711153D 1   1.00000                          
Structure written by Cerius2 SD Exporter
 19 18  0  0  0  0  0  0  0  0999 V2000
    0.1827   -1.6385    1.0584 C   0  0  0  0  0  0
    1.1144   -2.2066    0.9935 H   0  0  0  0  0  0
    0.1556   -1.1394    2.0319 H   0  0  0  0  0  0
   -0.6394   -2.3580    1.0221 H   0  0  0  0  0  0
    0.0769   -0.6289   -0.1262 C   0  0  0  0  0  0
    0.1189   -1.4265   -1.3390 O   0  0  0  0  0  0
    0.0725   -0.8169   -2.1142 H   0  0  0  0  0  0
   -1.5399    1.2058   -1.2412 O   0  0  0  0  0  0
   -2.3635    1.6717   -0.9940 H   0  0  0  0  0  0
   -2.5532   -0.6067   -0.0333 O   0  0  0  0  0  0
   -3.2732    0.0384    0.1123 H   0  0  0  0  0  0
    1.3732    1.3435    1.2031 O   0  0  0  0  0  0
    2.2170    1.8238    1.0860 H   0  0  0  0  0  0
    1.3021    1.4776   -1.2675 O   0  0  0  0  0  0
    2.1539    1.9432   -1.1483 H   0  0  0  0  0  0
   -1.4630    1.0813    1.1478 O   0  0  0  0  0  0
    2.5831   -0.1083   -0.1541 O   0  0  0  0  0  0
   -1.3105    0.2882   -0.0373 P   0  0  0  0  0  0
    1.2915    0.5116   -0.0796 P   0  0  0  0  0  0
  1  2  1  0  0  0
  1  3  1  0  0  0
  1  4  1  0  0  0
  1  5  1  0  0  0
  5  6  1  0  0  0
  5 18  1  0  0  0
  5 19  1  0  0  0
  6  7  1  0  0  0
  8  9  1  0  0  0
  8 18  1  0  0  0
 10 11  1  0  0  0
 10 18  1  0  0  0
 12 13  1  0  0  0
 12 19  1  0  0  0
 14 15  1  0  0  0
 14 19  1  0  0  0
 16 18  2  0  0  0
 17 19  2  0  0  0
M  END
$$$$
Molecule-032-Gentamincin_C1
  Cerius2 10300711153D 1   1.00000                          
Structure written by Cerius2 SD Exporter
 76 78  0  0  0  0  0  0  0  0999 V2000
   -8.0487   -1.3268   -0.1154 C   0  0  0  0  0  0
   -8.3419   -1.2963    0.9361 H   0  0  0  0  0  0
   -8.6690   -0.6179   -0.6657 H   0  0  0  0  0  0
   -8.2564   -2.3262   -0.5042 H   0  0  0  0  0  0
    4.8393    0.7256   -2.8348 C   0  0  0  0  0  0
    3.7546    0.7460   -2.7201 H   0  0  0  0  0  0
    5.2477    1.6687   -2.4664 H   0  0  0  0  0  0
    5.0565    0.6444   -3.9002 H   0  0  0  0  0  0
    4.7517   -2.8579    0.1793 C   0  0  0  0  0  0
    4.8637   -3.2762   -0.8245 H   0  0  0  0  0  0
    5.0815   -3.6219    0.8884 H   0  0  0  0  0  0
    0.6838    1.7760    0.8869 C   0  0  0  0  0  0
    1.5725    1.6444    1.5117 H   0  0  0  0  0  0
    0.4031    2.8307    0.9604 H   0  0  0  0  0  0
    5.6528   -1.6035    0.3142 C   0  0  0  0  0  0
    5.6774   -1.3066    1.3665 H   0  0  0  0  0  0
    6.6764   -1.8569    0.0288 H   0  0  0  0  0  0
   -6.5378   -0.9883   -0.2784 C   0  0  0  0  0  0
   -6.1731    0.4181    0.3177 C   0  0  0  0  0  0
   -6.3949    0.3375    1.3873 H   0  0  0  0  0  0
    5.4494   -0.4729   -2.0576 C   0  0  0  0  0  0
    5.0190   -1.3937   -2.4598 H   0  0  0  0  0  0
    1.0591    1.4535   -0.5949 C   0  0  0  0  0  0
   -0.4530    0.8820    1.4778 C   0  0  0  0  0  0
   -0.0039   -0.0195    1.9071 H   0  0  0  0  0  0
    3.2575   -2.5195    0.4291 C   0  0  0  0  0  0
    2.6502   -3.3879    0.1589 H   0  0  0  0  0  0
   -4.6396    0.7283    0.2329 C   0  0  0  0  0  0
   -4.4116    1.2021   -0.7219 H   0  0  0  0  0  0
   -0.7810   -0.3289   -0.7875 C   0  0  0  0  0  0
   -0.8997   -1.4035   -0.6205 H   0  0  0  0  0  0
    5.1205   -0.4015   -0.5273 C   0  0  0  0  0  0
    5.6239    0.4923   -0.1462 H   0  0  0  0  0  0
    0.7482   -0.0305   -0.9620 C   0  0  0  0  0  0
   -1.4790    0.4365    0.3943 C   0  0  0  0  0  0
   -1.9252    1.3580    0.0081 H   0  0  0  0  0  0
   -5.6419   -2.0844    0.4076 C   0  0  0  0  0  0
   -6.2008   -2.6000    1.1919 H   0  0  0  0  0  0
   -5.3545   -2.8455   -0.3230 H   0  0  0  0  0  0
    2.8261   -1.3140   -0.4556 C   0  0  0  0  0  0
    2.8496   -1.6336   -1.5020 H   0  0  0  0  0  0
   -3.7484   -0.5585    0.3310 C   0  0  0  0  0  0
   -3.5307   -0.9451   -0.6707 H   0  0  0  0  0  0
   -7.0900    1.9364   -1.5482 C   0  0  0  0  0  0
   -7.6747    2.8524   -1.6357 H   0  0  0  0  0  0
   -6.1043    2.1256   -1.9712 H   0  0  0  0  0  0
   -7.5908    1.1617   -2.1279 H   0  0  0  0  0  0
    7.4463   -1.0653   -3.4944 C   0  0  0  0  0  0
    7.1520   -0.4558   -4.3495 H   0  0  0  0  0  0
    8.5354   -1.0851   -3.4450 H   0  0  0  0  0  0
    7.0895   -2.0871   -3.6359 H   0  0  0  0  0  0
   -1.1155    1.5884    2.5876 N   0  0  0  0  0  0
   -1.8030    0.9401    2.9798 H   0  0  0  0  0  0
   -1.6458    2.3627    2.1818 H   0  0  0  0  0  0
    3.0196   -2.2546    1.8607 N   0  0  0  0  0  0
    3.3921   -3.0454    2.3898 H   0  0  0  0  0  0
    3.5700   -1.4315    2.1140 H   0  0  0  0  0  0
   -7.0172    1.5716   -0.1163 N   0  0  0  0  0  0
   -7.9745    1.3862    0.1934 H   0  0  0  0  0  0
    6.9278   -0.5016   -2.2301 N   0  0  0  0  0  0
    7.2808    0.4550   -2.1405 H   0  0  0  0  0  0
   -4.3139    1.6863    1.2473 O   0  0  0  0  0  0
   -4.3542    1.1833    2.0899 H   0  0  0  0  0  0
   -1.4662   -0.0325   -2.0110 O   0  0  0  0  0  0
   -1.1575    0.8671   -2.2442 H   0  0  0  0  0  0
   -6.2853   -1.0110   -1.6896 O   0  0  0  0  0  0
   -5.3446   -0.7769   -1.8127 H   0  0  0  0  0  0
    1.4677   -0.9605   -0.1115 O   0  0  0  0  0  0
   -4.4502   -1.5832    1.0594 O   0  0  0  0  0  0
    3.7140   -0.1894   -0.2483 O   0  0  0  0  0  0
   -2.5028   -0.3655    1.0402 O   0  0  0  0  0  0
    2.1238    1.6439   -0.7370 H   0  0  0  0  0  0
    0.3747    2.3694   -1.5309 N   0  0  0  0  0  0
    0.7492    3.3058   -1.3634 H   0  0  0  0  0  0
   -0.6102    2.4070   -1.2663 H   0  0  0  0  0  0
    1.0119   -0.2061   -2.0110 H   0  0  0  0  0  0
  1  2  1  0  0  0
  1  3  1  0  0  0
  1  4  1  0  0  0
  1 18  1  0  0  0
  5  6  1  0  0  0
  5  7  1  0  0  0
  5  8  1  0  0  0
  5 21  1  0  0  0
  9 10  1  0  0  0
  9 11  1  0  0  0
  9 15  1  0  0  0
  9 26  1  0  0  0
 12 13  1  0  0  0
 12 14  1  0  0  0
 12 23  1  0  0  0
 12 24  1  0  0  0
 15 16  1  0  0  0
 15 17  1  0  0  0
 15 32  1  0  0  0
 18 19  1  0  0  0
 18 37  1  0  0  0
 18 66  1  0  0  0
 19 20  1  0  0  0
 19 28  1  0  0  0
 19 58  1  0  0  0
 21 22  1  0  0  0
 21 32  1  0  0  0
 21 60  1  0  0  0
 23 34  1  0  0  0
 24 25  1  0  0  0
 24 35  1  0  0  0
 24 52  1  0  0  0
 26 27  1  0  0  0
 26 40  1  0  0  0
 26 55  1  0  0  0
 28 29  1  0  0  0
 28 42  1  0  0  0
 28 62  1  0  0  0
 30 31  1  0  0  0
 30 34  1  0  0  0
 30 35  1  0  0  0
 30 64  1  0  0  0
 32 33  1  0  0  0
 32 70  1  0  0  0
 34 68  1  0  0  0
 35 36  1  0  0  0
 35 71  1  0  0  0
 37 38  1  0  0  0
 37 39  1  0  0  0
 37 69  1  0  0  0
 40 41  1  0  0  0
 40 68  1  0  0  0
 40 70  1  0  0  0
 42 43  1  0  0  0
 42 69  1  0  0  0
 42 71  1  0  0  0
 44 45  1  0  0  0
 44 46  1  0  0  0
 44 47  1  0  0  0
 44 58  1  0  0  0
 48 49  1  0  0  0
 48 50  1  0  0  0
 48 51  1  0  0  0
 48 60  1  0  0  0
 52 53  1  0  0  0
 52 54  1  0  0  0
 55 56  1  0  0  0
 55 57  1  0  0  0
 58 59  1  0  0  0
 60 61  1  0  0  0
 62 63  1  0  0  0
 64 65  1  0  0  0
 66 67  1  0  0  0
 72 23  1  0  0  0
 73 23  1  0  0  0
 73 74  1  0  0  0
 73 75  1  0  0  0
 76 34  1  0  0  0
M  END
$$$$
Molecule-033-Imipenem
  Cerius2 10300711153D 1   1.00000                          

 37 38  0  0  0  0  0  0  0  0999 V2000
    3.3208   -3.3151   -0.6264 C   0  0  0  0  0  0
    3.4252   -4.3272    0.3380 C   0  0  0  0  0  0
    4.5895   -3.1847   -1.3873 C   0  0  0  0  0  0
    5.6216   -3.8603   -0.4534 C   0  0  0  0  0  0
    4.7073   -4.6923    0.2082 N   0  0  0  0  0  0
    5.4179   -5.8161    0.2027 C   0  0  0  0  0  0
    6.4239   -5.1945   -0.6710 C   0  0  0  0  0  0
    7.8859   -5.2597   -0.1437 C   0  0  0  0  0  0
    8.0006   -4.8694    1.2262 O   0  0  0  0  0  0
    8.8498   -4.4048   -0.9975 C   0  0  0  0  0  0
    5.1917   -6.9964    0.5478 O   0  0  0  0  0  0
    2.4330   -4.9078    1.1465 C   0  0  0  0  0  0
    1.9024   -2.3893   -1.0329 S   0  0  0  0  0  0
    1.1477   -4.4956    1.1278 O   0  0  0  0  0  0
    2.7022   -5.8377    1.9378 O   0  0  0  0  0  0
    2.0498   -1.1742    0.3030 C   0  0  0  0  0  0
    0.9398   -0.1003    0.2323 C   0  0  0  0  0  0
   -0.3530   -0.6558    0.4901 N   0  0  0  0  0  0
   -1.4163   -0.5352   -0.3296 C   0  0  0  0  0  0
   -2.5792   -1.0866    0.0398 N   0  0  0  0  0  0
    4.5181   -3.6957   -2.3508 H   0  0  0  0  0  0
    4.8494   -2.1352   -1.5425 H   0  0  0  0  0  0
    6.0816   -3.1575    0.2521 H   0  0  0  0  0  0
    9.8705   -4.5139   -0.6255 H   0  0  0  0  0  0
    8.8256   -4.7292   -2.0397 H   0  0  0  0  0  0
    8.5733   -3.3499   -0.9494 H   0  0  0  0  0  0
    3.0204   -0.6787    0.2229 H   0  0  0  0  0  0
    2.0009   -1.6834    1.2684 H   0  0  0  0  0  0
    1.1328    0.6487    1.0041 H   0  0  0  0  0  0
    0.9880    0.4073   -0.7367 H   0  0  0  0  0  0
   -1.3613   -0.0330   -1.2197 H   0  0  0  0  0  0
    7.8173   -3.9073    1.2541 H   0  0  0  0  0  0
   -0.4745   -1.1527    1.3150 H   0  0  0  0  0  0
   -2.6418   -1.5637    0.8814 H   0  0  0  0  0  0
    8.2145   -6.3016   -0.2050 H   0  0  0  0  0  0
    6.3350   -5.5717   -1.6944 H   0  0  0  0  0  0
    0.5004   -4.9371    1.7148 H   0  0  0  0  0  0
  1  2  2  0  0  0
  1 13  1  0  0  0
  2  5  1  0  0  0
  2 12  1  0  0  0
  3  1  1  0  0  0
  3 21  1  0  0  0
  3 22  1  0  0  0
  4  3  1  0  0  0
  4  5  1  0  0  0
  4 23  1  0  0  0
  5  6  1  0  0  0
  6  7  1  0  0  0
  6 11  2  0  0  0
  7  4  1  0  0  0
  7  8  1  0  0  0
  8  9  1  0  0  0
  8 10  1  0  0  0
  9 32  1  0  0  0
 10 24  1  0  0  0
 10 25  1  0  0  0
 10 26  1  0  0  0
 12 14  1  0  0  0
 12 15  2  0  0  0
 13 16  1  0  0  0
 14 37  1  0  0  0
 16 17  1  0  0  0
 16 27  1  0  0  0
 16 28  1  0  0  0
 17 18  1  0  0  0
 17 29  1  0  0  0
 17 30  1  0  0  0
 18 19  1  0  0  0
 18 33  1  0  0  0
 19 20  2  0  0  0
 19 31  1  0  0  0
 20 34  1  0  0  0
 35  8  1  0  0  0
 36  7  1  0  0  0
M  END
$$$$
Molecule-034-Iohexol
  Cerius2 10300711153D 1   1.00000                          
Structure written by Cerius2 SD Exporter
 60 60  0  0  0  0  0  0  0  0999 V2000
   -1.0238    0.7140   -1.0593 C   0  0  0  0  0  0
    1.4195    0.7322   -1.2533 C   0  0  0  0  0  0
    0.1916    1.4314   -1.1698 C   0  0  0  0  0  0
    1.4292   -0.6837   -1.2589 C   0  0  0  0  0  0
   -1.0108   -0.7021   -1.0307 C   0  0  0  0  0  0
    0.2174   -1.4078   -1.1224 C   0  0  0  0  0  0
    2.6200    1.4511   -1.3322 C   0  0  0  0  0  0
   -2.2354    1.4180   -1.0068 C   0  0  0  0  0  0
   -0.0735   -3.5292   -2.1788 C   0  0  0  0  0  0
   -0.3861   -2.9686   -3.5163 C   0  0  0  0  0  0
    0.4565   -2.3722   -3.8683 H   0  0  0  0  0  0
   -0.5732   -3.7585   -4.2471 H   0  0  0  0  0  0
   -1.2730   -2.3386   -3.4684 H   0  0  0  0  0  0
   -0.4223   -4.0431    1.0240 C   0  0  0  0  0  0
   -1.1506   -4.5484    0.3840 H   0  0  0  0  0  0
   -4.9567    2.3285    0.6645 C   0  0  0  0  0  0
   -4.7166    1.6588    1.4955 H   0  0  0  0  0  0
    5.1431    2.5499    0.9396 C   0  0  0  0  0  0
    4.5825    2.4810    1.8766 H   0  0  0  0  0  0
   -3.6581    3.0562    0.2111 C   0  0  0  0  0  0
   -3.8428    3.5968   -0.7225 H   0  0  0  0  0  0
   -3.3815    3.7989    0.9631 H   0  0  0  0  0  0
    4.1902    3.0074   -0.1950 C   0  0  0  0  0  0
    3.8513    4.0239    0.0176 H   0  0  0  0  0  0
    4.7419    3.0410   -1.1394 H   0  0  0  0  0  0
    0.7057   -3.4138    0.1575 C   0  0  0  0  0  0
    1.2448   -2.7092    0.8009 H   0  0  0  0  0  0
    1.4406   -4.1822   -0.1046 H   0  0  0  0  0  0
    0.1137   -5.0740    2.0480 C   0  0  0  0  0  0
    0.6488   -5.8760    1.5332 H   0  0  0  0  0  0
    0.7964   -4.5847    2.7469 H   0  0  0  0  0  0
   -6.0543    3.3228    1.1296 C   0  0  0  0  0  0
   -5.6636    3.9651    1.9219 H   0  0  0  0  0  0
   -6.3608    3.9509    0.2896 H   0  0  0  0  0  0
    5.8045    1.1771    0.6557 C   0  0  0  0  0  0
    5.0432    0.4295    0.4248 H   0  0  0  0  0  0
    6.4829    1.2623   -0.1965 H   0  0  0  0  0  0
    0.1715    3.4993   -1.2891 I   0  0  0  0  0  0
    3.2117   -1.7103   -1.4683 I   0  0  0  0  0  0
   -2.7931   -1.7347   -0.8521 I   0  0  0  0  0  0
   -2.5266    2.1860    0.0705 N   0  0  0  0  0  0
   -1.9015    2.1504    0.8135 H   0  0  0  0  0  0
    3.0223    2.1820   -0.2659 N   0  0  0  0  0  0
    2.4574    2.1558    0.5228 H   0  0  0  0  0  0
    0.2467   -2.7744   -1.0738 N   0  0  0  0  0  0
   -0.9633   -5.6566    2.7799 O   0  0  0  0  0  0
   -0.5454   -6.2748    3.4176 H   0  0  0  0  0  0
   -7.2042    2.6485    1.6400 O   0  0  0  0  0  0
   -7.8426    3.3559    1.8739 H   0  0  0  0  0  0
    6.5381    0.7244    1.7925 O   0  0  0  0  0  0
    6.9711   -0.1098    1.5108 H   0  0  0  0  0  0
   -1.0815   -3.0035    1.7476 O   0  0  0  0  0  0
   -1.5640   -2.4970    1.0706 H   0  0  0  0  0  0
   -5.4718    1.5440   -0.4129 O   0  0  0  0  0  0
   -4.6845    1.2613   -0.9105 H   0  0  0  0  0  0
    6.1641    3.5360    1.1054 O   0  0  0  0  0  0
    5.7054    4.3546    1.3916 H   0  0  0  0  0  0
   -3.0064    1.3403   -1.9905 O   0  0  0  0  0  0
    3.2850    1.4042   -2.3922 O   0  0  0  0  0  0
   -0.0790   -4.7816   -2.0997 O   0  0  0  0  0  0
  1  3  2  0  0  0
  1  5  1  0  0  0
  1  8  1  0  0  0
  2  3  1  0  0  0
  2  4  2  0  0  0
  2  7  1  0  0  0
  3 38  1  0  0  0
  4  6  1  0  0  0
  4 39  1  0  0  0
  5  6  2  0  0  0
  5 40  1  0  0  0
  6 45  1  0  0  0
  7 43  1  0  0  0
  7 59  2  0  0  0
  8 41  1  0  0  0
  8 58  2  0  0  0
  9 10  1  0  0  0
  9 45  1  0  0  0
  9 60  2  0  0  0
 10 11  1  0  0  0
 10 12  1  0  0  0
 10 13  1  0  0  0
 14 15  1  0  0  0
 14 26  1  0  0  0
 14 29  1  0  0  0
 14 52  1  0  0  0
 16 17  1  0  0  0
 16 20  1  0  0  0
 16 32  1  0  0  0
 16 54  1  0  0  0
 18 19  1  0  0  0
 18 23  1  0  0  0
 18 35  1  0  0  0
 18 56  1  0  0  0
 20 21  1  0  0  0
 20 22  1  0  0  0
 20 41  1  0  0  0
 23 24  1  0  0  0
 23 25  1  0  0  0
 23 43  1  0  0  0
 26 27  1  0  0  0
 26 28  1  0  0  0
 26 45  1  0  0  0
 29 30  1  0  0  0
 29 31  1  0  0  0
 29 46  1  0  0  0
 32 33  1  0  0  0
 32 34  1  0  0  0
 32 48  1  0  0  0
 35 36  1  0  0  0
 35 37  1  0  0  0
 35 50  1  0  0  0
 41 42  1  0  0  0
 43 44  1  0  0  0
 46 47  1  0  0  0
 48 49  1  0  0  0
 50 51  1  0  0  0
 52 53  1  0  0  0
 54 55  1  0  0  0
 56 57  1  0  0  0
M  END
$$$$
Molecule-035-Iotroxic_acid
  Cerius2 10300711153D 1   1.00000                          
Structure written by Cerius2 SD Exporter
 57 58  0  0  0  0  0  0  0  0999 V2000
    9.1115    2.4718    0.6006 C   0  0  0  0  0  0
    9.2786    3.3976    0.9994 H   0  0  0  0  0  0
  -10.9274   -0.7534    0.0269 C   0  0  0  0  0  0
  -11.3987    0.0689    0.4085 H   0  0  0  0  0  0
    9.8128    0.6426   -0.8646 C   0  0  0  0  0  0
  -10.9360   -2.6952   -1.4611 C   0  0  0  0  0  0
   10.0286    1.9323   -0.3170 C   0  0  0  0  0  0
  -11.5761   -1.5442   -0.9365 C   0  0  0  0  0  0
    7.9734    1.7480    0.9880 C   0  0  0  0  0  0
   -9.6429   -1.0870    0.4829 C   0  0  0  0  0  0
    8.6574   -0.0883   -0.4790 C   0  0  0  0  0  0
   -9.6329   -3.0301   -1.0058 C   0  0  0  0  0  0
    7.7321    0.4695    0.4356 C   0  0  0  0  0  0
   -8.9819   -2.2193   -0.0452 C   0  0  0  0  0  0
    5.3591    0.0803    0.4362 C   0  0  0  0  0  0
   -6.6106   -1.8438    0.0919 C   0  0  0  0  0  0
   10.7321    0.1055   -1.7783 C   0  0  0  0  0  0
  -11.5879   -3.4846   -2.4205 C   0  0  0  0  0  0
    4.2663   -0.8159    0.8655 C   0  0  0  0  0  0
    4.4748   -1.8120    0.4660 H   0  0  0  0  0  0
    4.2817   -0.8598    1.9576 H   0  0  0  0  0  0
   -5.3175   -2.3562    0.5890 C   0  0  0  0  0  0
   -5.3793   -2.4135    1.6789 H   0  0  0  0  0  0
   -5.1806   -3.3634    0.1866 H   0  0  0  0  0  0
    1.8659   -1.2046    0.8073 C   0  0  0  0  0  0
    1.7932   -1.2540    1.8978 H   0  0  0  0  0  0
    1.9858   -2.2176    0.4120 H   0  0  0  0  0  0
   -2.9170   -1.9728    0.6688 C   0  0  0  0  0  0
   -2.6914   -2.9685    0.2758 H   0  0  0  0  0  0
   -2.8938   -2.0077    1.7620 H   0  0  0  0  0  0
    0.5591   -0.6091    0.2516 C   0  0  0  0  0  0
    0.4377    0.4033    0.6484 H   0  0  0  0  0  0
    0.6330   -0.5570   -0.8388 H   0  0  0  0  0  0
   -1.8332   -0.9929    0.1828 C   0  0  0  0  0  0
   -1.8583   -0.9559   -0.9104 H   0  0  0  0  0  0
   -2.0572    0.0027    0.5774 H   0  0  0  0  0  0
   11.6786    3.0866   -0.7525 I   0  0  0  0  0  0
  -13.4783   -0.9621   -1.4726 I   0  0  0  0  0  0
    6.7297    2.5954    2.3917 I   0  0  0  0  0  0
   -8.8085    0.0935    1.9476 I   0  0  0  0  0  0
    8.2435   -1.9490   -1.2769 I   0  0  0  0  0  0
   -8.6118   -4.6584   -1.7649 I   0  0  0  0  0  0
    6.6318   -0.2436    0.7714 N   0  0  0  0  0  0
    6.7728   -1.0789    1.2433 H   0  0  0  0  0  0
   -7.7338   -2.5543    0.3573 N   0  0  0  0  0  0
   -7.6315   -3.3966    0.8268 H   0  0  0  0  0  0
   11.0939    0.7792   -2.8905 O   0  0  0  0  0  0
   11.7398    0.3711   -3.5030 H   0  0  0  0  0  0
  -12.0807   -2.9474   -3.5564 O   0  0  0  0  0  0
  -12.5307   -3.5315   -4.2008 H   0  0  0  0  0  0
    5.1143    1.1076   -0.2413 O   0  0  0  0  0  0
   -6.6632   -0.7846   -0.5787 O   0  0  0  0  0  0
   11.2562   -1.0158   -1.5988 O   0  0  0  0  0  0
  -11.7423   -4.7155   -2.2617 O   0  0  0  0  0  0
    2.9707   -0.3686    0.4086 O   0  0  0  0  0  0
   -4.2041   -1.5209    0.2018 O   0  0  0  0  0  0
   -0.5458   -1.4468    0.6473 O   0  0  0  0  0  0
  1  2  1  0  0  0
  1  7  2  0  0  0
  1  9  1  0  0  0
  3  4  1  0  0  0
  3  8  1  0  0  0
  3 10  2  0  0  0
  5  7  1  0  0  0
  5 11  2  0  0  0
  5 17  1  0  0  0
  6  8  2  0  0  0
  6 12  1  0  0  0
  6 18  1  0  0  0
  7 37  1  0  0  0
  8 38  1  0  0  0
  9 13  2  0  0  0
  9 39  1  0  0  0
 10 14  1  0  0  0
 10 40  1  0  0  0
 11 13  1  0  0  0
 11 41  1  0  0  0
 12 14  2  0  0  0
 12 42  1  0  0  0
 13 43  1  0  0  0
 14 45  1  0  0  0
 15 19  1  0  0  0
 15 43  1  0  0  0
 15 51  2  0  0  0
 16 22  1  0  0  0
 16 45  1  0  0  0
 16 52  2  0  0  0
 17 47  1  0  0  0
 17 53  2  0  0  0
 18 49  1  0  0  0
 18 54  2  0  0  0
 19 20  1  0  0  0
 19 21  1  0  0  0
 19 55  1  0  0  0
 22 23  1  0  0  0
 22 24  1  0  0  0
 22 56  1  0  0  0
 25 26  1  0  0  0
 25 27  1  0  0  0
 25 31  1  0  0  0
 25 55  1  0  0  0
 28 29  1  0  0  0
 28 30  1  0  0  0
 28 34  1  0  0  0
 28 56  1  0  0  0
 31 32  1  0  0  0
 31 33  1  0  0  0
 31 57  1  0  0  0
 34 35  1  0  0  0
 34 36  1  0  0  0
 34 57  1  0  0  0
 43 44  1  0  0  0
 45 46  1  0  0  0
 47 48  1  0  0  0
 49 50  1  0  0  0
M  END
$$$$
Molecule-036-Mitoxantrone
  Cerius2 10300711153D 1   1.00000                          
Structure written by Cerius2 SD Exporter
 60 62  0  0  0  0  0  0  0  0999 V2000
    0.6933    1.4505    0.0802 C   0  0  0  0  0  0
    1.1627    2.3549    0.1501 H   0  0  0  0  0  0
   -0.6896    1.4530   -0.0738 C   0  0  0  0  0  0
   -1.1563    2.3593   -0.1372 H   0  0  0  0  0  0
   -0.7066   -5.9709   -0.0271 C   0  0  0  0  0  0
   -1.2106   -6.8613   -0.0329 H   0  0  0  0  0  0
    0.6889   -5.9729   -0.0202 C   0  0  0  0  0  0
    1.1903   -6.8648   -0.0209 H   0  0  0  0  0  0
   -0.7188   -1.0035   -0.0487 C   0  0  0  0  0  0
    0.7155   -1.0059    0.0374 C   0  0  0  0  0  0
   -0.7193   -3.5057   -0.0197 C   0  0  0  0  0  0
    0.7087   -3.5078   -0.0097 C   0  0  0  0  0  0
    1.4173    0.2443    0.1414 C   0  0  0  0  0  0
   -1.4170    0.2494   -0.1438 C   0  0  0  0  0  0
    1.3962   -4.7624   -0.0112 C   0  0  0  0  0  0
   -1.4104   -4.7583   -0.0274 C   0  0  0  0  0  0
    1.3946   -2.2633    0.0078 C   0  0  0  0  0  0
   -1.4016   -2.2591   -0.0281 C   0  0  0  0  0  0
   -3.6448    1.4347   -0.1934 C   0  0  0  0  0  0
   -3.4717    2.1402   -1.0103 H   0  0  0  0  0  0
   -3.4665    1.9378    0.7614 H   0  0  0  0  0  0
    3.6486    1.4227    0.1992 C   0  0  0  0  0  0
    3.4776    2.1229    1.0211 H   0  0  0  0  0  0
    3.4715    1.9331   -0.7520 H   0  0  0  0  0  0
   -5.1093    0.9509   -0.2367 C   0  0  0  0  0  0
   -5.2915    0.4350   -1.1843 H   0  0  0  0  0  0
   -5.2758    0.2487    0.5859 H   0  0  0  0  0  0
    5.1117    0.9343    0.2388 C   0  0  0  0  0  0
    5.2924    0.4113    1.1827 H   0  0  0  0  0  0
    5.2759    0.2376   -0.5887 H   0  0  0  0  0  0
   -7.4607    1.7461   -0.1060 C   0  0  0  0  0  0
   -7.6789    1.0718    0.7269 H   0  0  0  0  0  0
   -7.7270    1.2477   -1.0424 H   0  0  0  0  0  0
    7.4653    1.7235    0.1136 C   0  0  0  0  0  0
    7.6816    1.0545   -0.7240 H   0  0  0  0  0  0
    7.7302    1.2178    1.0465 H   0  0  0  0  0  0
   -8.3174    3.0169    0.0476 C   0  0  0  0  0  0
   -8.0735    3.5169    0.9880 H   0  0  0  0  0  0
   -8.1178    3.7015   -0.7799 H   0  0  0  0  0  0
    8.3257    2.9929   -0.0311 C   0  0  0  0  0  0
    8.0833    3.5002   -0.9680 H   0  0  0  0  0  0
    8.1281    3.6723    0.8012 H   0  0  0  0  0  0
   -2.7658    0.3150   -0.3318 N   0  0  0  0  0  0
   -3.1948   -0.5074   -0.5981 H   0  0  0  0  0  0
    2.7663    0.3046    0.3298 N   0  0  0  0  0  0
    3.1929   -0.5208    0.5903 H   0  0  0  0  0  0
   -6.0245    2.1052   -0.1069 N   0  0  0  0  0  0
   -5.8638    2.7037   -0.9207 H   0  0  0  0  0  0
    6.0302    2.0869    0.1171 N   0  0  0  0  0  0
    5.8712    2.6801    0.9350 H   0  0  0  0  0  0
   -2.7580   -4.9123   -0.0409 O   0  0  0  0  0  0
   -3.3616   -4.1434   -0.0430 H   0  0  0  0  0  0
    2.7433   -4.9204    0.0012 O   0  0  0  0  0  0
    3.3491   -4.1533    0.0088 H   0  0  0  0  0  0
   -9.7005    2.6747    0.0457 O   0  0  0  0  0  0
  -10.1776    3.5254    0.1506 H   0  0  0  0  0  0
    9.7078    2.6467   -0.0317 O   0  0  0  0  0  0
   10.1874    3.4967   -0.1307 H   0  0  0  0  0  0
   -2.6538   -2.2896    0.0073 O   0  0  0  0  0  0
    2.6467   -2.2972   -0.0276 O   0  0  0  0  0  0
  1  2  1  0  0  0
  1  3  1  0  0  0
  1 13  2  0  0  0
  3  4  1  0  0  0
  3 14  2  0  0  0
  5  6  1  0  0  0
  5  7  1  0  0  0
  5 16  2  0  0  0
  7  8  1  0  0  0
  7 15  2  0  0  0
  9 10  2  0  0  0
  9 14  1  0  0  0
  9 18  1  0  0  0
 10 13  1  0  0  0
 10 17  1  0  0  0
 11 12  2  0  0  0
 11 16  1  0  0  0
 11 18  1  0  0  0
 12 15  1  0  0  0
 12 17  1  0  0  0
 13 45  1  0  0  0
 14 43  1  0  0  0
 15 53  1  0  0  0
 16 51  1  0  0  0
 17 60  2  0  0  0
 18 59  2  0  0  0
 19 20  1  0  0  0
 19 21  1  0  0  0
 19 25  1  0  0  0
 19 43  1  0  0  0
 22 23  1  0  0  0
 22 24  1  0  0  0
 22 28  1  0  0  0
 22 45  1  0  0  0
 25 26  1  0  0  0
 25 27  1  0  0  0
 25 47  1  0  0  0
 28 29  1  0  0  0
 28 30  1  0  0  0
 28 49  1  0  0  0
 31 32  1  0  0  0
 31 33  1  0  0  0
 31 37  1  0  0  0
 31 47  1  0  0  0
 34 35  1  0  0  0
 34 36  1  0  0  0
 34 40  1  0  0  0
 34 49  1  0  0  0
 37 38  1  0  0  0
 37 39  1  0  0  0
 37 55  1  0  0  0
 40 41  1  0  0  0
 40 42  1  0  0  0
 40 57  1  0  0  0
 43 44  1  0  0  0
 45 46  1  0  0  0
 47 48  1  0  0  0
 49 50  1  0  0  0
 51 52  1  0  0  0
 53 54  1  0  0  0
 55 56  1  0  0  0
 57 58  1  0  0  0
M  END
$$$$
Molecule-037-Moexipril_diacid
  Cerius2 10300711153D 1   1.00000                          
Structure written by Cerius2 SD Exporter
 64 66  0  0  0  0  0  0  0  0999 V2000
    7.6918    1.6480   -2.0242 C   0  0  0  0  0  0
    8.3320    1.9390   -2.7664 H   0  0  0  0  0  0
    7.9210    0.4490   -1.3264 C   0  0  0  0  0  0
    8.7289   -0.1317   -1.5606 H   0  0  0  0  0  0
    6.5811    2.4464   -1.6996 C   0  0  0  0  0  0
    6.4144    3.3195   -2.2054 H   0  0  0  0  0  0
    5.7000    2.0448   -0.6784 C   0  0  0  0  0  0
    4.8991    2.6407   -0.4540 H   0  0  0  0  0  0
    7.0392    0.0471   -0.3061 C   0  0  0  0  0  0
    7.2234   -0.8303    0.1867 H   0  0  0  0  0  0
   -3.9772    0.3078   -2.7628 C   0  0  0  0  0  0
   -3.8989    1.3279   -2.7964 H   0  0  0  0  0  0
   -4.1945   -2.4804   -2.6937 C   0  0  0  0  0  0
   -4.2684   -3.4988   -2.6658 H   0  0  0  0  0  0
    5.9145    0.8381    0.0305 C   0  0  0  0  0  0
   -3.1295   -0.4335   -1.9123 C   0  0  0  0  0  0
   -3.2416   -1.8418   -1.8695 C   0  0  0  0  0  0
   -4.9349   -0.3271   -3.5770 C   0  0  0  0  0  0
   -5.0463   -1.7429   -3.5487 C   0  0  0  0  0  0
   -0.4696   -2.5855    0.5883 C   0  0  0  0  0  0
    2.2584    0.5526    2.6052 C   0  0  0  0  0  0
   -3.0397   -0.4127    1.1853 C   0  0  0  0  0  0
   -0.1236   -1.6435    2.9310 C   0  0  0  0  0  0
   -0.8738   -2.3782    3.2323 H   0  0  0  0  0  0
    0.6360   -1.6094    3.7139 H   0  0  0  0  0  0
   -0.5941   -0.6636    2.8827 H   0  0  0  0  0  0
    4.9742    0.4206    1.1068 C   0  0  0  0  0  0
    4.8550    1.2545    1.8035 H   0  0  0  0  0  0
    5.3927   -0.4134    1.6776 H   0  0  0  0  0  0
   -2.1084    0.2366   -1.0720 C   0  0  0  0  0  0
   -1.1719    0.2553   -1.6365 H   0  0  0  0  0  0
   -2.3849    1.2753   -0.8653 H   0  0  0  0  0  0
    3.5875   -0.0123    0.5490 C   0  0  0  0  0  0
    3.1332    0.8214    0.0048 H   0  0  0  0  0  0
    3.7480   -0.8226   -0.1695 H   0  0  0  0  0  0
    0.5252   -2.0481    1.5773 C   0  0  0  0  0  0
    1.2114   -2.8671    1.8277 H   0  0  0  0  0  0
    2.5923   -0.5168    1.6338 C   0  0  0  0  0  0
    3.0697   -1.3508    2.1589 H   0  0  0  0  0  0
   -1.8749   -0.5285    0.2632 C   0  0  0  0  0  0
   -1.0704    0.0096    0.7547 H   0  0  0  0  0  0
   -2.3691   -2.6484   -0.9662 C   0  0  0  0  0  0
   -3.0069   -3.3154   -0.3783 H   0  0  0  0  0  0
   -1.7533   -3.2672   -1.6269 H   0  0  0  0  0  0
   -6.7346    0.2476   -5.2692 C   0  0  0  0  0  0
   -7.5655   -0.2490   -4.7656 H   0  0  0  0  0  0
   -7.0912    1.1883   -5.6889 H   0  0  0  0  0  0
   -6.3656   -0.3811   -6.0806 H   0  0  0  0  0  0
   -6.2718   -3.7513   -4.4965 C   0  0  0  0  0  0
   -5.3932   -4.2951   -4.8471 H   0  0  0  0  0  0
   -6.6109   -4.1719   -3.5484 H   0  0  0  0  0  0
   -7.0684   -3.8600   -5.2334 H   0  0  0  0  0  0
    1.3715   -1.0025    0.9331 N   0  0  0  0  0  0
    0.8053   -0.1897    0.6912 H   0  0  0  0  0  0
   -1.5138   -1.9169   -0.0256 N   0  0  0  0  0  0
    1.6103    1.6709    2.2140 O   0  0  0  0  0  0
    1.4086    2.3593    2.8810 H   0  0  0  0  0  0
   -3.6935   -1.4869    1.6787 O   0  0  0  0  0  0
   -4.4473   -1.3448    2.2872 H   0  0  0  0  0  0
   -0.3021   -3.8033    0.3212 O   0  0  0  0  0  0
    2.5710    0.4555    3.8124 O   0  0  0  0  0  0
   -3.4501    0.7092    1.5574 O   0  0  0  0  0  0
   -5.6829    0.5253   -4.3400 O   0  0  0  0  0  0
   -5.9689   -2.3594   -4.3449 O   0  0  0  0  0  0
  1  2  1  0  0  0
  1  3  2  0  0  0
  1  5  1  0  0  0
  3  4  1  0  0  0
  3  9  1  0  0  0
  5  6  1  0  0  0
  5  7  2  0  0  0
  7  8  1  0  0  0
  7 15  1  0  0  0
  9 10  1  0  0  0
  9 15  2  0  0  0
 11 12  1  0  0  0
 11 16  1  0  0  0
 11 18  2  0  0  0
 13 14  1  0  0  0
 13 17  1  0  0  0
 13 19  2  0  0  0
 15 27  1  0  0  0
 16 17  2  0  0  0
 16 30  1  0  0  0
 17 42  1  0  0  0
 18 19  1  0  0  0
 18 63  1  0  0  0
 19 64  1  0  0  0
 20 36  1  0  0  0
 20 55  1  0  0  0
 20 60  2  0  0  0
 21 38  1  0  0  0
 21 56  1  0  0  0
 21 61  2  0  0  0
 22 40  1  0  0  0
 22 58  1  0  0  0
 22 62  2  0  0  0
 23 24  1  0  0  0
 23 25  1  0  0  0
 23 26  1  0  0  0
 23 36  1  0  0  0
 27 28  1  0  0  0
 27 29  1  0  0  0
 27 33  1  0  0  0
 30 31  1  0  0  0
 30 32  1  0  0  0
 30 40  1  0  0  0
 33 34  1  0  0  0
 33 35  1  0  0  0
 33 38  1  0  0  0
 36 37  1  0  0  0
 36 53  1  0  0  0
 38 39  1  0  0  0
 38 53  1  0  0  0
 40 41  1  0  0  0
 40 55  1  0  0  0
 42 43  1  0  0  0
 42 44  1  0  0  0
 42 55  1  0  0  0
 45 46  1  0  0  0
 45 47  1  0  0  0
 45 48  1  0  0  0
 45 63  1  0  0  0
 49 50  1  0  0  0
 49 51  1  0  0  0
 49 52  1  0  0  0
 49 64  1  0  0  0
 53 54  1  0  0  0
 56 57  1  0  0  0
 58 59  1  0  0  0
M  END
$$$$
Molecule-038-Pamidronic_acid
  Cerius2 10300711153D 1   1.00000                          
Structure written by Cerius2 SD Exporter
 24 23  0  0  0  0  0  0  0  0999 V2000
   -0.5788    0.5692    0.9770 C   0  0  0  0  0  0
   -0.0646    1.3594    1.5338 H   0  0  0  0  0  0
   -1.3046    0.1319    1.6709 H   0  0  0  0  0  0
   -1.3872    1.2589   -0.1573 C   0  0  0  0  0  0
   -0.7251    1.7688   -0.8584 H   0  0  0  0  0  0
   -1.9901    0.5314   -0.7022 H   0  0  0  0  0  0
    0.4755   -0.5385    0.6105 C   0  0  0  0  0  0
   -2.3019    2.2565    0.4091 N   0  0  0  0  0  0
   -1.7300    2.9901    0.8346 H   0  0  0  0  0  0
   -2.8013    2.6882   -0.3724 H   0  0  0  0  0  0
    1.0143   -0.9789    1.8833 O   0  0  0  0  0  0
    1.3860   -0.1861    2.3371 H   0  0  0  0  0  0
   -0.7225   -1.5512   -1.6029 O   0  0  0  0  0  0
   -0.9761   -2.4424   -1.9159 H   0  0  0  0  0  0
   -1.3512   -2.4344    0.5348 O   0  0  0  0  0  0
   -1.5355   -3.2464    0.0226 H   0  0  0  0  0  0
    2.8668   -1.0160   -0.5730 O   0  0  0  0  0  0
    3.4473   -0.5417   -1.2005 H   0  0  0  0  0  0
    2.3849    1.1921    0.2279 O   0  0  0  0  0  0
    3.0188    1.4527   -0.4697 H   0  0  0  0  0  0
    0.7315   -2.9657   -0.3732 O   0  0  0  0  0  0
    1.3249    0.4293   -1.6946 O   0  0  0  0  0  0
   -0.1511   -1.8457   -0.2131 P   0  0  0  0  0  0
    1.7069   -0.0333   -0.3924 P   0  0  0  0  0  0
  1  2  1  0  0  0
  1  3  1  0  0  0
  1  4  1  0  0  0
  1  7  1  0  0  0
  4  5  1  0  0  0
  4  6  1  0  0  0
  4  8  1  0  0  0
  7 11  1  0  0  0
  7 23  1  0  0  0
  7 24  1  0  0  0
  8  9  1  0  0  0
  8 10  1  0  0  0
 11 12  1  0  0  0
 13 14  1  0  0  0
 13 23  1  0  0  0
 15 16  1  0  0  0
 15 23  1  0  0  0
 17 18  1  0  0  0
 17 24  1  0  0  0
 19 20  1  0  0  0
 19 24  1  0  0  0
 21 23  2  0  0  0
 22 24  2  0  0  0
M  END
$$$$
Molecule-039-Phthalylsulfathiazole
  Cerius2 10300711153D 1   1.00000                          
Structure written by Cerius2 SD Exporter
 40 42  0  0  0  0  0  0  0  0999 V2000
   -5.9768   -1.9849    0.3139 C   0  0  0  0  0  0
   -6.2974   -2.9368    0.5085 H   0  0  0  0  0  0
   -6.8634   -0.9074    0.4400 C   0  0  0  0  0  0
   -7.8317   -1.0732    0.7253 H   0  0  0  0  0  0
   -4.6518   -1.7558   -0.0885 C   0  0  0  0  0  0
   -4.0346   -2.5667   -0.1905 H   0  0  0  0  0  0
   -6.4189    0.3992    0.1800 C   0  0  0  0  0  0
   -7.0931    1.1617    0.2953 H   0  0  0  0  0  0
    0.1384    0.3020   -1.0452 C   0  0  0  0  0  0
   -0.4035    1.0570   -1.4670 H   0  0  0  0  0  0
    0.3089   -1.7101    0.2995 C   0  0  0  0  0  0
   -0.1195   -2.4567    0.8536 H   0  0  0  0  0  0
    1.5373    0.3198   -1.1993 C   0  0  0  0  0  0
    1.9658    1.0732   -1.7444 H   0  0  0  0  0  0
    1.7087   -1.6947    0.1500 C   0  0  0  0  0  0
    2.2636   -2.4300    0.5978 H   0  0  0  0  0  0
   -4.1884   -0.4449   -0.3677 C   0  0  0  0  0  0
   -5.0787    0.6635   -0.2104 C   0  0  0  0  0  0
   -0.4993   -0.7222   -0.3041 C   0  0  0  0  0  0
    2.3366   -0.6810   -0.6062 C   0  0  0  0  0  0
    8.2177    0.3309    0.1953 C   0  0  0  0  0  0
    9.0625    0.0868   -0.3242 H   0  0  0  0  0  0
    8.2166    1.0600    1.3750 C   0  0  0  0  0  0
    9.0637    1.4134    1.8214 H   0  0  0  0  0  0
    6.0438    0.4178    0.6569 C   0  0  0  0  0  0
   -2.8630   -0.3063   -0.8254 C   0  0  0  0  0  0
   -4.6889    2.0123   -0.3924 C   0  0  0  0  0  0
   -1.8391   -0.8103   -0.0899 N   0  0  0  0  0  0
   -2.1041   -1.3132    0.6954 H   0  0  0  0  0  0
    4.7272    0.2026    0.5038 N   0  0  0  0  0  0
    4.1193    0.5555    1.1674 H   0  0  0  0  0  0
    6.9872   -0.0211   -0.1922 N   0  0  0  0  0  0
   -3.4160    2.4466   -0.2600 O   0  0  0  0  0  0
   -3.2554    3.4059   -0.3857 H   0  0  0  0  0  0
   -2.6849    0.2545   -1.9316 O   0  0  0  0  0  0
   -5.5155    2.9150   -0.6572 O   0  0  0  0  0  0
    4.6450   -2.1394   -0.7594 O   0  0  0  0  0  0
    4.4868    0.0506   -2.1528 O   0  0  0  0  0  0
    6.6329    1.3145    2.0208 S   0  0  0  0  0  0
    4.0746   -0.6543   -0.7869 S   0  0  0  0  0  0
  1  2  1  0  0  0
  1  3  1  0  0  0
  1  5  2  0  0  0
  3  4  1  0  0  0
  3  7  2  0  0  0
  5  6  1  0  0  0
  5 17  1  0  0  0
  7  8  1  0  0  0
  7 18  1  0  0  0
  9 10  1  0  0  0
  9 13  1  0  0  0
  9 19  2  0  0  0
 11 12  1  0  0  0
 11 15  2  0  0  0
 11 19  1  0  0  0
 13 14  1  0  0  0
 13 20  2  0  0  0
 15 16  1  0  0  0
 15 20  1  0  0  0
 17 18  2  0  0  0
 17 26  1  0  0  0
 18 27  1  0  0  0
 19 28  1  0  0  0
 20 40  1  0  0  0
 21 22  1  0  0  0
 21 23  2  0  0  0
 21 32  1  0  0  0
 23 24  1  0  0  0
 23 39  1  0  0  0
 25 30  1  0  0  0
 25 32  2  0  0  0
 25 39  1  0  0  0
 26 28  1  0  0  0
 26 35  2  0  0  0
 27 33  1  0  0  0
 27 36  2  0  0  0
 28 29  1  0  0  0
 30 31  1  0  0  0
 30 40  1  0  0  0
 33 34  1  0  0  0
 37 40  2  0  0  0
 38 40  2  0  0  0
M  END
$$$$
Molecule-040-Succinylsulfathiazole
  Cerius2 10300711153D 1   1.00000                          
Structure written by Cerius2 SD Exporter
 36 37  0  0  0  0  0  0  0  0999 V2000
    0.7082   -0.0841   -0.9086 C   0  0  0  0  0  0
    1.3380   -0.2936   -1.6838 H   0  0  0  0  0  0
    0.2559    0.1987    1.4577 C   0  0  0  0  0  0
    0.5544    0.1735    2.4366 H   0  0  0  0  0  0
   -0.6148    0.2931   -1.2074 C   0  0  0  0  0  0
   -0.9112    0.3248   -2.1870 H   0  0  0  0  0  0
   -1.0675    0.5780    1.1633 C   0  0  0  0  0  0
   -1.6981    0.8161    1.9342 H   0  0  0  0  0  0
    1.1600   -0.1527    0.4313 C   0  0  0  0  0  0
   -1.5169    0.6270   -0.1740 C   0  0  0  0  0  0
   -7.4117    0.4754   -1.3701 C   0  0  0  0  0  0
   -8.1208    1.1830   -1.5693 H   0  0  0  0  0  0
   -7.6686   -0.8865   -1.3188 C   0  0  0  0  0  0
   -8.5910   -1.2937   -1.4767 H   0  0  0  0  0  0
   -5.3958   -0.3351   -0.8952 C   0  0  0  0  0  0
    3.3304   -1.2760    0.1757 C   0  0  0  0  0  0
    5.9044    0.3386   -0.4038 C   0  0  0  0  0  0
    4.6536   -1.5020    0.8030 C   0  0  0  0  0  0
    5.2086   -2.2632    0.2457 H   0  0  0  0  0  0
    4.4893   -1.9003    1.8072 H   0  0  0  0  0  0
    5.5239   -0.2206    0.9069 C   0  0  0  0  0  0
    4.9932    0.5384    1.4867 H   0  0  0  0  0  0
    6.4420   -0.4597    1.4489 H   0  0  0  0  0  0
    2.4143   -0.5085    0.8186 N   0  0  0  0  0  0
    2.6825   -0.1923    1.6946 H   0  0  0  0  0  0
   -4.0804   -0.3262   -0.6264 N   0  0  0  0  0  0
   -3.6327   -1.1688   -0.4706 H   0  0  0  0  0  0
   -6.1287    0.7656   -1.1293 N   0  0  0  0  0  0
    5.4992    1.5695   -0.7794 O   0  0  0  0  0  0
    5.7729    1.9110   -1.6556 H   0  0  0  0  0  0
    3.0904   -1.8427   -0.9152 O   0  0  0  0  0  0
    6.6217   -0.3095   -1.1971 O   0  0  0  0  0  0
   -3.2224    1.8261   -1.9499 O   0  0  0  0  0  0
   -3.7479    2.0249    0.5936 O   0  0  0  0  0  0
   -6.2676   -1.8342   -0.9596 S   0  0  0  0  0  0
   -3.1635    1.0801   -0.5457 S   0  0  0  0  0  0
  1  2  1  0  0  0
  1  5  1  0  0  0
  1  9  2  0  0  0
  3  4  1  0  0  0
  3  7  2  0  0  0
  3  9  1  0  0  0
  5  6  1  0  0  0
  5 10  2  0  0  0
  7  8  1  0  0  0
  7 10  1  0  0  0
  9 24  1  0  0  0
 10 36  1  0  0  0
 11 12  1  0  0  0
 11 13  2  0  0  0
 11 28  1  0  0  0
 13 14  1  0  0  0
 13 35  1  0  0  0
 15 26  1  0  0  0
 15 28  2  0  0  0
 15 35  1  0  0  0
 16 18  1  0  0  0
 16 24  1  0  0  0
 16 31  2  0  0  0
 17 21  1  0  0  0
 17 29  1  0  0  0
 17 32  2  0  0  0
 18 19  1  0  0  0
 18 20  1  0  0  0
 18 21  1  0  0  0
 21 22  1  0  0  0
 21 23  1  0  0  0
 24 25  1  0  0  0
 26 27  1  0  0  0
 26 36  1  0  0  0
 29 30  1  0  0  0
 33 36  2  0  0  0
 34 36  2  0  0  0
M  END
$$$$
Molecule-041-Sulbactam
  Cerius2 10300711153D 1   1.00000                          

 26 27  0  0  0  0  0  0  0  0999 V2000
    3.4716   -8.9604    1.1872 C   0  0  0  0  0  0
    2.3677   -8.0639    1.5171 C   0  0  0  0  0  0
    2.9354   -7.1559    0.3861 C   0  0  0  0  0  0
    3.9624   -8.1180    0.2707 N   0  0  0  0  0  0
    5.1965   -7.8483   -0.4028 C   0  0  0  0  0  0
    5.5980   -6.4599    0.2354 C   0  0  0  0  0  0
    3.9795   -5.7132    0.6697 S   0  0  0  0  0  0
    3.8472   -5.2358    2.1838 O   0  0  0  0  0  0
    3.5247   -4.5880   -0.3614 O   0  0  0  0  0  0
    6.4396   -6.6202    1.5446 C   0  0  0  0  0  0
    6.3696   -5.5450   -0.7654 C   0  0  0  0  0  0
    6.2653   -8.8856   -0.4163 C   0  0  0  0  0  0
    6.2345   -9.9129    0.2931 O   0  0  0  0  0  0
    7.3410   -8.7490   -1.2244 O   0  0  0  0  0  0
    3.8574  -10.0310    1.7017 O   0  0  0  0  0  0
    2.4446   -7.6418    2.5214 H   0  0  0  0  0  0
    1.3908   -8.4979    1.2941 H   0  0  0  0  0  0
    7.4204   -7.0492    1.3292 H   0  0  0  0  0  0
    5.9328   -7.2745    2.2577 H   0  0  0  0  0  0
    6.5988   -5.6513    2.0239 H   0  0  0  0  0  0
    6.5305   -4.5544   -0.3336 H   0  0  0  0  0  0
    7.3448   -5.9699   -1.0082 H   0  0  0  0  0  0
    5.8102   -5.4220   -1.6953 H   0  0  0  0  0  0
    2.3240   -7.0924   -0.5190 H   0  0  0  0  0  0
    7.4330   -7.9765   -1.8172 H   0  0  0  0  0  0
    4.9267   -7.7114   -1.4556 H   0  0  0  0  0  0
  1  4  1  0  0  0
  1 15  2  0  0  0
  2  1  1  0  0  0
  2 16  1  0  0  0
  2 17  1  0  0  0
  3  2  1  0  0  0
  3  4  1  0  0  0
  4  5  1  0  0  0
  5  6  1  0  0  0
  5 12  1  0  0  0
  6  7  1  0  0  0
  6 10  1  0  0  0
  6 11  1  0  0  0
  7  3  1  0  0  0
  7  8  2  0  0  0
  7  9  2  0  0  0
 10 18  1  0  0  0
 10 19  1  0  0  0
 10 20  1  0  0  0
 11 21  1  0  0  0
 11 22  1  0  0  0
 11 23  1  0  0  0
 12 13  2  0  0  0
 12 14  1  0  0  0
 14 25  1  0  0  0
 24  3  1  0  0  0
 26  5  1  0  0  0
M  END
$$$$
Molecule-042-Ticarcillin
  Cerius2 10300711153D 1   1.00000                          
Structure written by Cerius2 SD Exporter
 41 43  0  0  0  0  0  0  0  0999 V2000
    3.7278    2.4536   -1.2994 C   0  0  0  0  0  0
    4.4940    2.2390   -1.9417 H   0  0  0  0  0  0
    2.9236    1.4939   -0.6872 C   0  0  0  0  0  0
    3.3757    3.7496   -0.9472 C   0  0  0  0  0  0
    3.8592    4.5751   -1.3040 H   0  0  0  0  0  0
    1.9792    2.1245    0.1295 C   0  0  0  0  0  0
    1.2916    1.6191    0.6883 H   0  0  0  0  0  0
    1.8952   -0.5469   -1.6116 C   0  0  0  0  0  0
   -1.5458    0.0132   -1.8353 C   0  0  0  0  0  0
    3.3301   -0.7080    0.3645 C   0  0  0  0  0  0
   -4.7029   -0.8545   -0.4379 C   0  0  0  0  0  0
   -2.1685    1.1334    1.7075 C   0  0  0  0  0  0
   -2.9320    1.9057    1.8234 H   0  0  0  0  0  0
   -1.6438    1.0306    2.6607 H   0  0  0  0  0  0
   -1.4489    1.4788    0.9617 H   0  0  0  0  0  0
   -3.7964   -0.6881    2.3958 C   0  0  0  0  0  0
   -3.2826   -0.7526    3.3579 H   0  0  0  0  0  0
   -4.6265    0.0138    2.4997 H   0  0  0  0  0  0
   -4.2037   -1.6758    2.1699 H   0  0  0  0  0  0
    3.0655    0.0222   -0.8965 C   0  0  0  0  0  0
    3.9425   -0.1404   -1.5319 H   0  0  0  0  0  0
   -2.8216   -0.2180    1.2729 C   0  0  0  0  0  0
   -0.5404   -1.0342   -1.6371 C   0  0  0  0  0  0
   -0.4175   -1.6419   -2.5384 H   0  0  0  0  0  0
   -3.4653   -0.0768   -0.1612 C   0  0  0  0  0  0
   -3.6875    0.9667   -0.4058 H   0  0  0  0  0  0
   -1.5786   -1.6348   -0.6304 C   0  0  0  0  0  0
   -2.0358   -2.5793   -0.9416 H   0  0  0  0  0  0
    0.6705   -0.5634   -1.0356 N   0  0  0  0  0  0
    0.6050   -0.2198   -0.1319 H   0  0  0  0  0  0
   -2.3704   -0.5221   -0.9375 N   0  0  0  0  0  0
    4.4810   -1.3917    0.5393 O   0  0  0  0  0  0
    4.6312   -1.8652    1.3839 H   0  0  0  0  0  0
   -4.7128   -1.9562   -1.2205 O   0  0  0  0  0  0
   -5.5612   -2.4215   -1.3728 H   0  0  0  0  0  0
    2.0552   -1.0065   -2.7672 O   0  0  0  0  0  0
   -1.5693    1.0785   -2.4897 O   0  0  0  0  0  0
    2.5154   -0.7266    1.3145 O   0  0  0  0  0  0
   -5.8025   -0.4970    0.0417 O   0  0  0  0  0  0
    2.0409    3.8566    0.1499 S   0  0  0  0  0  0
   -1.4583   -1.4369    1.1616 S   0  0  0  0  0  0
  1  2  1  0  0  0
  1  3  1  0  0  0
  1  4  2  0  0  0
  3  6  2  0  0  0
  3 20  1  0  0  0
  4  5  1  0  0  0
  4 40  1  0  0  0
  6  7  1  0  0  0
  6 40  1  0  0  0
  8 20  1  0  0  0
  8 29  1  0  0  0
  8 36  2  0  0  0
  9 23  1  0  0  0
  9 31  1  0  0  0
  9 37  2  0  0  0
 10 20  1  0  0  0
 10 32  1  0  0  0
 10 38  2  0  0  0
 11 25  1  0  0  0
 11 34  1  0  0  0
 11 39  2  0  0  0
 12 13  1  0  0  0
 12 14  1  0  0  0
 12 15  1  0  0  0
 12 22  1  0  0  0
 16 17  1  0  0  0
 16 18  1  0  0  0
 16 19  1  0  0  0
 16 22  1  0  0  0
 20 21  1  0  0  0
 22 25  1  0  0  0
 22 41  1  0  0  0
 23 24  1  0  0  0
 23 27  1  0  0  0
 23 29  1  0  0  0
 25 26  1  0  0  0
 25 31  1  0  0  0
 27 28  1  0  0  0
 27 31  1  0  0  0
 27 41  1  0  0  0
 29 30  1  0  0  0
 32 33  1  0  0  0
 34 35  1  0  0  0
M  END
$$$$
Molecule-043-Cefmetazole
  Cerius2 10300711153D 1   1.00000                          
Structure written by Cerius2 SD Exporter
 47 49  0  0  0  0  0  0  0  0999 V2000
    6.1519   -3.5639    0.9589 C   0  0  0  0  0  0
   -5.5888   -1.2080   -0.8258 C   0  0  0  0  0  0
   -2.0522    0.6909   -0.5281 C   0  0  0  0  0  0
   -1.2116    0.4397    0.6047 C   0  0  0  0  0  0
    4.1723    0.4560   -0.0632 C   0  0  0  0  0  0
    1.2389    0.7467    1.1543 C   0  0  0  0  0  0
   -1.6326   -0.2789    1.7563 C   0  0  0  0  0  0
    2.0149    1.6345    0.2710 C   0  0  0  0  0  0
    0.6211    1.8428   -0.4094 C   0  0  0  0  0  0
    0.2236    2.8560   -0.2817 H   0  0  0  0  0  0
    5.8801   -2.2416    0.7665 C   0  0  0  0  0  0
    5.2263   -1.8998    1.5687 H   0  0  0  0  0  0
    6.8176   -1.6856    0.7960 H   0  0  0  0  0  0
   -1.5008    1.2359   -1.8178 C   0  0  0  0  0  0
   -1.9214    0.6786   -2.6578 H   0  0  0  0  0  0
   -1.8187    2.2759   -1.9195 H   0  0  0  0  0  0
   -3.5267    0.4556   -0.5398 C   0  0  0  0  0  0
   -3.9634    0.6352    0.4434 H   0  0  0  0  0  0
   -4.0218    1.1558   -1.2182 H   0  0  0  0  0  0
    5.1037   -0.2222   -0.9858 C   0  0  0  0  0  0
    4.8304    0.0127   -2.0161 H   0  0  0  0  0  0
    6.1189    0.1480   -0.8295 H   0  0  0  0  0  0
   -5.8198   -3.1518    0.7083 C   0  0  0  0  0  0
   -5.3365   -3.8797    0.0540 H   0  0  0  0  0  0
   -5.0985   -2.8045    1.4500 H   0  0  0  0  0  0
   -6.6390   -3.6493    1.2317 H   0  0  0  0  0  0
    3.0802    3.8300    0.1466 C   0  0  0  0  0  0
    2.3750    4.1919   -0.6040 H   0  0  0  0  0  0
    3.3529    4.6672    0.7893 H   0  0  0  0  0  0
    3.9861    3.4738   -0.3472 H   0  0  0  0  0  0
    2.9939    0.9402   -0.5196 N   0  0  0  0  0  0
    2.7880    0.8054   -1.4559 H   0  0  0  0  0  0
    6.3862   -4.6763    1.1238 N   0  0  0  0  0  0
   -6.4480   -0.3311   -1.3567 N   0  0  0  0  0  0
   -6.2997   -2.0490   -0.0589 N   0  0  0  0  0  0
   -7.6207   -0.6474   -0.9133 N   0  0  0  0  0  0
   -7.5364   -1.6784   -0.1337 N   0  0  0  0  0  0
    0.0656    0.9291    0.5240 N   0  0  0  0  0  0
   -2.7968   -0.9534    1.8642 O   0  0  0  0  0  0
   -2.9972   -1.4166    2.7037 H   0  0  0  0  0  0
    4.5059    0.5931    1.1361 O   0  0  0  0  0  0
    1.6025    0.0185    2.1053 O   0  0  0  0  0  0
   -0.9534   -0.3514    2.8026 O   0  0  0  0  0  0
    2.4998    2.8040    0.9723 O   0  0  0  0  0  0
   -3.8718   -1.2298   -1.1054 S   0  0  0  0  0  0
    5.0680   -2.0282   -0.8358 S   0  0  0  0  0  0
    0.2965    1.1756   -2.0533 S   0  0  0  0  0  0
  1 11  1  0  0  0
  1 33  3  0  0  0
  2 34  2  0  0  0
  2 35  1  0  0  0
  2 45  1  0  0  0
  3  4  2  0  0  0
  3 14  1  0  0  0
  3 17  1  0  0  0
  4  7  1  0  0  0
  4 38  1  0  0  0
  5 20  1  0  0  0
  5 31  1  0  0  0
  5 41  2  0  0  0
  6  8  1  0  0  0
  6 38  1  0  0  0
  6 42  2  0  0  0
  7 39  1  0  0  0
  7 43  2  0  0  0
  8  9  1  0  0  0
  8 31  1  0  0  0
  8 44  1  0  0  0
  9 10  1  0  0  0
  9 38  1  0  0  0
  9 47  1  0  0  0
 11 12  1  0  0  0
 11 13  1  0  0  0
 11 46  1  0  0  0
 14 15  1  0  0  0
 14 16  1  0  0  0
 14 47  1  0  0  0
 17 18  1  0  0  0
 17 19  1  0  0  0
 17 45  1  0  0  0
 20 21  1  0  0  0
 20 22  1  0  0  0
 20 46  1  0  0  0
 23 24  1  0  0  0
 23 25  1  0  0  0
 23 26  1  0  0  0
 23 35  1  0  0  0
 27 28  1  0  0  0
 27 29  1  0  0  0
 27 30  1  0  0  0
 27 44  1  0  0  0
 31 32  1  0  0  0
 34 36  1  0  0  0
 35 37  1  0  0  0
 36 37  2  0  0  0
 39 40  1  0  0  0
M  END
$$$$
Molecule-044-Acamprosate
  Cerius2 10300711153D 1   1.00000                          
Structure written by Cerius2 SD Exporter
 22 21  0  0  0  0  0  0  0  0999 V2000
    2.9999    0.3471    0.2592 C   0  0  0  0  0  0
    3.5931   -1.0015    0.1765 C   0  0  0  0  0  0
    4.6828   -0.9552    0.2439 H   0  0  0  0  0  0
    3.2209   -1.6177    0.9956 H   0  0  0  0  0  0
    3.3239   -1.4644   -0.7734 H   0  0  0  0  0  0
   -0.7479    0.3677    0.0509 C   0  0  0  0  0  0
   -0.8675    0.9199    0.9879 H   0  0  0  0  0  0
   -0.7659    1.0864   -0.7740 H   0  0  0  0  0  0
    0.6268   -0.3448    0.0630 C   0  0  0  0  0  0
    0.6613   -1.0527    0.8963 H   0  0  0  0  0  0
    0.7600   -0.8932   -0.8741 H   0  0  0  0  0  0
   -1.9307   -0.6213   -0.1111 C   0  0  0  0  0  0
   -1.8301   -1.1691   -1.0500 H   0  0  0  0  0  0
   -1.9309   -1.3389    0.7117 H   0  0  0  0  0  0
    1.6761    0.6133    0.2071 N   0  0  0  0  0  0
    1.4268    1.5488    0.2745 H   0  0  0  0  0  0
   -3.6076    1.3379   -1.3699 O   0  0  0  0  0  0
   -4.1572    2.0418   -0.9702 H   0  0  0  0  0  0
    3.7478    1.3409    0.3874 O   0  0  0  0  0  0
   -4.7083   -0.8411   -0.3237 O   0  0  0  0  0  0
   -3.7650    1.0043    1.2310 O   0  0  0  0  0  0
   -3.5355    0.2091   -0.1237 S   0  0  0  0  0  0
  1  2  1  0  0  0
  1 15  1  0  0  0
  1 19  2  0  0  0
  2  3  1  0  0  0
  2  4  1  0  0  0
  2  5  1  0  0  0
  6  7  1  0  0  0
  6  8  1  0  0  0
  6  9  1  0  0  0
  6 12  1  0  0  0
  9 10  1  0  0  0
  9 11  1  0  0  0
  9 15  1  0  0  0
 12 13  1  0  0  0
 12 14  1  0  0  0
 12 22  1  0  0  0
 15 16  1  0  0  0
 17 18  1  0  0  0
 17 22  1  0  0  0
 20 22  2  0  0  0
 21 22  2  0  0  0
M  END
$$$$
Molecule-045-Cilazapril
  Cerius2 10300711153D 1   1.00000                          

 61 63  0  0  0  0  0  0  0  0999 V2000
   -3.9160   -2.4003   -0.3806 C   0  0  0  0  0  0
   -4.9758   -2.3289    0.7694 C   0  0  0  0  0  0
   -5.4555   -3.7348    1.2113 C   0  0  0  0  0  0
   -4.2488   -4.6567    1.4961 C   0  0  0  0  0  0
   -3.3265   -4.5780    0.3311 N   0  0  0  0  0  0
   -2.8400   -3.3260    0.0018 N   0  0  0  0  0  0
   -1.4900   -3.0421    0.0056 C   0  0  0  0  0  0
   -2.6327   -5.7978   -0.1530 C   0  0  0  0  0  0
   -0.3724   -3.8765    0.5670 C   0  0  0  0  0  0
   -1.4948   -6.2362    0.7981 C   0  0  0  0  0  0
   -0.7586   -5.0626    1.4958 C   0  0  0  0  0  0
   -3.5888   -1.0062   -0.8011 C   0  0  0  0  0  0
   -1.0840   -2.0058   -0.5700 O   0  0  0  0  0  0
   -3.1705   -0.1562    0.0181 O   0  0  0  0  0  0
   -3.7539   -0.5977   -2.0808 O   0  0  0  0  0  0
    0.5333   -3.0125    1.3887 N   0  0  0  0  0  0
    1.9408   -2.7719    0.9575 C   0  0  0  0  0  0
    2.0335   -2.0698   -0.3489 C   0  0  0  0  0  0
    2.8135   -4.0621    1.0472 C   0  0  0  0  0  0
    4.3425   -3.8105    0.8897 C   0  0  0  0  0  0
    5.2655   -4.9816    0.9980 C   0  0  0  0  0  0
    4.8400   -6.3165    1.2207 C   0  0  0  0  0  0
    5.7704   -7.3692    1.3087 C   0  0  0  0  0  0
    7.1448   -7.1089    1.1762 C   0  0  0  0  0  0
    7.5880   -5.7940    0.9552 C   0  0  0  0  0  0
    6.6564   -4.7430    0.8670 C   0  0  0  0  0  0
    1.8509   -2.6954   -1.4204 O   0  0  0  0  0  0
    2.3352   -0.7422   -0.3677 O   0  0  0  0  0  0
    2.4298    0.1127   -1.5159 C   0  0  0  0  0  0
    1.0509    0.3811   -2.1535 C   0  0  0  0  0  0
   -4.5391   -1.8258    1.6381 H   0  0  0  0  0  0
   -5.8471   -1.7498    0.4480 H   0  0  0  0  0  0
   -6.0773   -3.6516    2.1066 H   0  0  0  0  0  0
   -6.0635   -4.1754    0.4157 H   0  0  0  0  0  0
   -3.7374   -4.3274    2.4033 H   0  0  0  0  0  0
   -4.6091   -5.6764    1.6553 H   0  0  0  0  0  0
   -3.3504   -6.6136   -0.2689 H   0  0  0  0  0  0
   -2.2213   -5.5988   -1.1467 H   0  0  0  0  0  0
   -1.9113   -6.8847    1.5740 H   0  0  0  0  0  0
   -0.7737   -6.8306    0.2296 H   0  0  0  0  0  0
    0.1487   -5.4785    1.9441 H   0  0  0  0  0  0
   -1.3660   -4.6835    2.3206 H   0  0  0  0  0  0
    2.3306   -2.0834    1.7125 H   0  0  0  0  0  0
    2.4896   -4.7723    0.2823 H   0  0  0  0  0  0
    2.6396   -4.5168    2.0266 H   0  0  0  0  0  0
    4.6399   -3.0839    1.6513 H   0  0  0  0  0  0
    4.5111   -3.3533   -0.0892 H   0  0  0  0  0  0
    3.8504   -6.5453    1.3212 H   0  0  0  0  0  0
    5.4467   -8.3260    1.4690 H   0  0  0  0  0  0
    7.8204   -7.8739    1.2399 H   0  0  0  0  0  0
    8.5877   -5.6016    0.8582 H   0  0  0  0  0  0
    7.0039   -3.7939    0.7045 H   0  0  0  0  0  0
    2.8526    1.0641   -1.1867 H   0  0  0  0  0  0
    3.1080   -0.3232   -2.2541 H   0  0  0  0  0  0
    1.1523    1.0994   -2.9689 H   0  0  0  0  0  0
    0.6282   -0.5418   -2.5526 H   0  0  0  0  0  0
    0.3673    0.7889   -1.4066 H   0  0  0  0  0  0
   -4.0772   -1.2175   -2.7653 H   0  0  0  0  0  0
    0.0860   -2.0961    1.4863 H   0  0  0  0  0  0
   -4.4092   -2.8591   -1.2438 H   0  0  0  0  0  0
    0.1616   -4.2976   -0.2882 H   0  0  0  0  0  0
  1  2  1  0  0  0
  1  6  1  0  0  0
  1 12  1  0  0  0
  2  3  1  0  0  0
  2 31  1  0  0  0
  2 32  1  0  0  0
  3  4  1  0  0  0
  3 33  1  0  0  0
  3 34  1  0  0  0
  4  5  1  0  0  0
  4 35  1  0  0  0
  4 36  1  0  0  0
  5  6  1  0  0  0
  5  8  1  0  0  0
  6  7  1  0  0  0
  7  9  1  0  0  0
  7 13  2  0  0  0
  8 10  1  0  0  0
  8 37  1  0  0  0
  8 38  1  0  0  0
  9 11  1  0  0  0
  9 16  1  0  0  0
 10 11  1  0  0  0
 10 39  1  0  0  0
 10 40  1  0  0  0
 11 41  1  0  0  0
 11 42  1  0  0  0
 12 14  2  0  0  0
 12 15  1  0  0  0
 15 58  1  0  0  0
 16 17  1  0  0  0
 16 59  1  0  0  0
 17 18  1  0  0  0
 17 19  1  0  0  0
 17 43  1  0  0  0
 18 27  2  0  0  0
 18 28  1  0  0  0
 19 20  1  0  0  0
 19 44  1  0  0  0
 19 45  1  0  0  0
 20 21  1  0  0  0
 20 46  1  0  0  0
 20 47  1  0  0  0
 21 22  2  0  0  0
 22 23  1  0  0  0
 22 48  1  0  0  0
 23 24  2  0  0  0
 23 49  1  0  0  0
 24 25  1  0  0  0
 24 50  1  0  0  0
 25 26  2  0  0  0
 25 51  1  0  0  0
 26 21  1  0  0  0
 26 52  1  0  0  0
 28 29  1  0  0  0
 29 30  1  0  0  0
 29 53  1  0  0  0
 29 54  1  0  0  0
 30 55  1  0  0  0
 30 56  1  0  0  0
 30 57  1  0  0  0
 60  1  1  0  0  0
 61  9  1  0  0  0
M  END
$$$$
Molecule-046-Lincomycin
  Cerius2 10300711153D 1   1.00000                          

 61 62  0  0  0  0  0  0  0  0999 V2000
    4.8758    4.9576   -0.0251 C   0  0  0  0  0  0
    4.7227    4.3236    1.3770 C   0  0  0  0  0  0
    3.3044    4.4558    2.0017 C   0  0  0  0  0  0
    2.1626    3.7175    1.2378 C   0  0  0  0  0  0
    0.7686    3.9148    1.8740 C   0  0  0  0  0  0
   -0.0401    2.6862    1.3874 C   0  0  0  0  0  0
    0.9624    1.5842    1.4708 N   0  0  0  0  0  0
    2.2963    2.1731    1.1582 C   0  0  0  0  0  0
   -0.6075    2.7965    0.0050 C   0  0  0  0  0  0
   -0.4841    3.8540   -0.6553 O   0  0  0  0  0  0
   -1.2993    1.8395   -0.6586 N   0  0  0  0  0  0
   -1.6653    0.5139   -0.2243 C   0  0  0  0  0  0
   -3.2311    0.4151   -0.3034 C   0  0  0  0  0  0
   -3.8842   -0.5092    0.7559 C   0  0  0  0  0  0
   -3.6613    0.0204   -1.6079 O   0  0  0  0  0  0
   -0.8549   -0.5047   -1.0999 C   0  0  0  0  0  0
    0.5572   -0.2508   -0.8681 O   0  0  0  0  0  0
    1.5079   -1.0171   -1.6400 C   0  0  0  0  0  0
    1.5209   -0.5092   -3.3869 S   0  0  0  0  0  0
    1.9488    1.2316   -3.1535 C   0  0  0  0  0  0
    1.2741   -2.5411   -1.4350 C   0  0  0  0  0  0
    2.1459   -3.3165   -2.2623 O   0  0  0  0  0  0
   -0.2108   -2.9168   -1.6863 C   0  0  0  0  0  0
   -0.4239   -4.3017   -1.3826 O   0  0  0  0  0  0
   -1.1610   -2.0146   -0.8449 C   0  0  0  0  0  0
   -1.0330   -2.3258    0.5471 O   0  0  0  0  0  0
    5.9241    4.9283   -0.3285 H   0  0  0  0  0  0
    4.2924    4.4071   -0.7647 H   0  0  0  0  0  0
    4.5475    5.9987   -0.0125 H   0  0  0  0  0  0
    5.0082    3.2706    1.3212 H   0  0  0  0  0  0
    5.4330    4.8165    2.0469 H   0  0  0  0  0  0
    3.3499    4.0714    3.0248 H   0  0  0  0  0  0
    3.0533    5.5183    2.0670 H   0  0  0  0  0  0
    0.8365    3.8935    2.9662 H   0  0  0  0  0  0
    0.3141    4.8652    1.5805 H   0  0  0  0  0  0
    2.5727    1.8767    0.1432 H   0  0  0  0  0  0
    3.0794    1.8055    1.8284 H   0  0  0  0  0  0
   -1.5839    2.0854   -1.5531 H   0  0  0  0  0  0
   -3.6090   -1.5507    0.6050 H   0  0  0  0  0  0
   -3.5826   -0.2083    1.7611 H   0  0  0  0  0  0
   -4.9715   -0.4350    0.6906 H   0  0  0  0  0  0
   -4.6415    0.0704   -1.5882 H   0  0  0  0  0  0
    2.0241    1.7098   -4.1299 H   0  0  0  0  0  0
    1.1775    1.7380   -2.5728 H   0  0  0  0  0  0
    2.9080    1.3195   -2.6426 H   0  0  0  0  0  0
    1.5148   -2.7817   -0.3948 H   0  0  0  0  0  0
    1.9144   -4.2514   -2.0664 H   0  0  0  0  0  0
   -1.3446   -4.4959   -1.6630 H   0  0  0  0  0  0
   -1.1561   -3.2985    0.6026 H   0  0  0  0  0  0
   -1.3702    0.3608    0.8139 H   0  0  0  0  0  0
    2.1151    4.1196    0.2206 H   0  0  0  0  0  0
   -0.8901    2.5312    2.0592 H   0  0  0  0  0  0
    0.9244    0.7794    2.7278 C   0  0  0  0  0  0
    1.6265   -0.0534    2.6536 H   0  0  0  0  0  0
    1.1873    1.3855    3.5982 H   0  0  0  0  0  0
   -0.0687    0.3562    2.8849 H   0  0  0  0  0  0
   -1.0895   -0.2855   -2.1470 H   0  0  0  0  0  0
   -2.1844   -2.2351   -1.1556 H   0  0  0  0  0  0
   -0.4311   -2.7779   -2.7493 H   0  0  0  0  0  0
    2.4991   -0.7904   -1.2405 H   0  0  0  0  0  0
   -3.6539    1.4097   -0.1196 H   0  0  0  0  0  0
  1  2  1  0  0  0
  1 27  1  0  0  0
  1 28  1  0  0  0
  1 29  1  0  0  0
  2  3  1  0  0  0
  2 30  1  0  0  0
  2 31  1  0  0  0
  3  4  1  0  0  0
  3 32  1  0  0  0
  3 33  1  0  0  0
  4  5  1  0  0  0
  4 51  1  0  0  0
  5  6  1  0  0  0
  5 34  1  0  0  0
  5 35  1  0  0  0
  6  7  1  0  0  0
  6  9  1  0  0  0
  7  8  1  0  0  0
  8  4  1  0  0  0
  8 36  1  0  0  0
  8 37  1  0  0  0
  9 10  2  0  0  0
  9 11  1  0  0  0
 11 12  1  0  0  0
 11 38  1  0  0  0
 12 13  1  0  0  0
 12 16  1  0  0  0
 13 14  1  0  0  0
 13 15  1  0  0  0
 14 39  1  0  0  0
 14 40  1  0  0  0
 14 41  1  0  0  0
 15 42  1  0  0  0
 16 17  1  0  0  0
 17 18  1  0  0  0
 18 19  1  0  0  0
 18 21  1  0  0  0
 19 20  1  0  0  0
 20 43  1  0  0  0
 20 44  1  0  0  0
 20 45  1  0  0  0
 21 22  1  0  0  0
 21 23  1  0  0  0
 21 46  1  0  0  0
 22 47  1  0  0  0
 23 24  1  0  0  0
 23 25  1  0  0  0
 24 48  1  0  0  0
 25 16  1  0  0  0
 25 26  1  0  0  0
 25 58  1  0  0  0
 26 49  1  0  0  0
 50 12  1  0  0  0
 52  6  1  0  0  0
 53  7  1  0  0  0
 53 54  1  0  0  0
 53 55  1  0  0  0
 53 56  1  0  0  0
 57 16  1  0  0  0
 59 23  1  0  0  0
 60 18  1  0  0  0
 61 13  1  0  0  0
M  END
$$$$
Molecule-047-Netivudine
  Cerius2 10300711153D 1   1.00000                          

 34 35  0  0  0  0  0  0  0  0999 V2000
   -0.2963   -3.3529   -5.4557 C   0  0  0  0  0  0
    0.4476   -2.3001   -5.0146 C   0  0  0  0  0  0
    1.0995   -1.3771   -4.6273 C   0  0  0  0  0  0
    1.8110   -0.3696   -4.1999 C   0  0  0  0  0  0
    1.9699   -0.1343   -2.8180 C   0  0  0  0  0  0
    2.7119    0.9225   -2.3488 N   0  0  0  0  0  0
    2.8445    1.1399   -0.9165 C   0  0  0  0  0  0
    2.4533    2.4894   -0.6096 O   0  0  0  0  0  0
    3.3389    2.9841    0.4021 C   0  0  0  0  0  0
    3.4120    4.5269    0.3416 C   0  0  0  0  0  0
    4.3388    5.0231    1.3078 O   0  0  0  0  0  0
    4.6938    2.2910    0.1497 C   0  0  0  0  0  0
    5.5000    2.2584    1.3287 O   0  0  0  0  0  0
    4.2664    0.8962   -0.3293 C   0  0  0  0  0  0
    5.2052    0.3191   -1.2422 O   0  0  0  0  0  0
    3.3136    1.7576   -3.2596 C   0  0  0  0  0  0
    4.0090    2.7492   -2.9469 O   0  0  0  0  0  0
    3.1774    1.5522   -4.5877 N   0  0  0  0  0  0
    2.4510    0.5270   -5.0798 C   0  0  0  0  0  0
    2.3850    0.4294   -6.3267 O   0  0  0  0  0  0
    2.1493    0.5020   -0.3563 H   0  0  0  0  0  0
    4.1930    0.2300    0.5367 H   0  0  0  0  0  0
    5.2457    2.8016   -0.6447 H   0  0  0  0  0  0
    2.9515    2.6911    1.3850 H   0  0  0  0  0  0
   -0.9153   -3.7271   -4.6398 H   0  0  0  0  0  0
   -0.9359   -3.0285   -6.2771 H   0  0  0  0  0  0
    0.3653   -4.1469   -5.8030 H   0  0  0  0  0  0
    1.5159   -0.7764   -2.1573 H   0  0  0  0  0  0
    3.7228    4.8481   -0.6555 H   0  0  0  0  0  0
    2.4230    4.9432    0.5451 H   0  0  0  0  0  0
    4.3169    6.0007    1.2124 H   0  0  0  0  0  0
    5.5319    3.2009    1.6036 H   0  0  0  0  0  0
    6.0504    0.2715   -0.7444 H   0  0  0  0  0  0
    3.6125    2.1590   -5.2032 H   0  0  0  0  0  0
  1  2  1  0  0  0
  1 25  1  0  0  0
  1 26  1  0  0  0
  1 27  1  0  0  0
  2  3  3  0  0  0
  3  4  1  0  0  0
  4  5  2  0  0  0
  5  6  1  0  0  0
  5 28  1  0  0  0
  6  7  1  0  0  0
  6 16  1  0  0  0
  7  8  1  0  0  0
  8  9  1  0  0  0
  9 10  1  0  0  0
  9 12  1  0  0  0
 10 11  1  0  0  0
 10 29  1  0  0  0
 10 30  1  0  0  0
 11 31  1  0  0  0
 12 13  1  0  0  0
 12 14  1  0  0  0
 13 32  1  0  0  0
 14  7  1  0  0  0
 14 15  1  0  0  0
 15 33  1  0  0  0
 16 17  2  0  0  0
 16 18  1  0  0  0
 18 19  1  0  0  0
 18 34  1  0  0  0
 19  4  1  0  0  0
 19 20  2  0  0  0
 21  7  1  0  0  0
 22 14  1  0  0  0
 23 12  1  0  0  0
 24  9  1  0  0  0
M  END
$$$$
Molecule-048_Fosmidomycin
  Cerius2 10300711153D 1   1.00000                          
Structure written by Cerius2 SD Exporter
 21 20  0  0  0  0  0  0  0  0999 V2000
    2.9238   -1.2724   -0.4582 C   0  0  0  0  0  0
    2.3213   -1.9758   -0.8909 H   0  0  0  0  0  0
    0.0611   -0.0097    0.1086 C   0  0  0  0  0  0
    0.0084   -1.1017    0.0660 H   0  0  0  0  0  0
    0.2860    0.2805    1.1400 H   0  0  0  0  0  0
    1.2267    0.4718   -0.7975 C   0  0  0  0  0  0
    1.0659    0.1362   -1.8265 H   0  0  0  0  0  0
    1.2198    1.5666   -0.8161 H   0  0  0  0  0  0
   -1.3089    0.5955   -0.3136 C   0  0  0  0  0  0
   -1.2540    1.6850   -0.2691 H   0  0  0  0  0  0
   -1.5330    0.3069   -1.3426 H   0  0  0  0  0  0
    2.5080    0.0152   -0.3328 N   0  0  0  0  0  0
    3.2980    0.8951    0.2263 O   0  0  0  0  0  0
    4.1823    0.6291    0.5611 H   0  0  0  0  0  0
   -2.3864    0.4957    2.1068 O   0  0  0  0  0  0
   -3.1644    0.0840    2.5316 H   0  0  0  0  0  0
   -3.8918    0.7935    0.1919 O   0  0  0  0  0  0
   -4.5523    0.3587    0.7664 H   0  0  0  0  0  0
    4.0549   -1.6384   -0.0600 O   0  0  0  0  0  0
   -2.8149   -1.2935    0.5843 O   0  0  0  0  0  0
   -2.5884    0.1223    0.6358 P   0  0  0  0  0  0
  1  2  1  0  0  0
  1 12  1  0  0  0
  1 19  2  0  0  0
  3  4  1  0  0  0
  3  5  1  0  0  0
  3  6  1  0  0  0
  3  9  1  0  0  0
  6  7  1  0  0  0
  6  8  1  0  0  0
  6 12  1  0  0  0
  9 10  1  0  0  0
  9 11  1  0  0  0
  9 21  1  0  0  0
 12 13  1  0  0  0
 13 14  1  0  0  0
 15 16  1  0  0  0
 15 21  1  0  0  0
 17 18  1  0  0  0
 17 21  1  0  0  0
 20 21  2  0  0  0
M  END
$$$$
Molecule-049-AAFC
  Cerius2 10300711153D 1   1.00000                          

 27 29  0  0  0  0  0  0  0  0999 V2000
   -4.9085    0.0300   -1.9800 O   0  0  0  0  0  0
   -3.9401   -0.7883   -1.3263 C   0  0  0  0  0  0
   -4.1242   -0.7232    0.2118 C   0  0  0  0  0  0
   -3.2403   -1.6497    0.8651 O   0  0  0  0  0  0
   -2.1041   -0.9277    1.3608 C   0  0  0  0  0  0
   -2.4141    0.5841    1.3353 C   0  0  0  0  0  0
   -1.4564    1.1293    0.4210 O   0  0  0  0  0  0
   -0.6423    0.1525   -0.0190 C   0  0  0  0  0  0
    0.3971    0.2796   -0.8761 N   0  0  0  0  0  0
    1.1171   -0.8152   -1.2373 C   0  0  0  0  0  0
    2.1400   -0.6339   -2.0876 N   0  0  0  0  0  0
    0.7851   -2.0923   -0.7267 C   0  0  0  0  0  0
   -0.3064   -2.1780    0.1615 C   0  0  0  0  0  0
   -0.9875   -1.0448    0.4907 N   0  0  0  0  0  0
   -3.8643    0.6724    0.8337 C   0  0  0  0  0  0
   -4.7492    0.9212    1.9316 O   0  0  0  0  0  0
   -1.8507   -1.2683    2.3696 H   0  0  0  0  0  0
   -2.2918    1.0470    2.3190 H   0  0  0  0  0  0
   -3.9760    1.4822    0.1072 H   0  0  0  0  0  0
   -5.1500   -1.0364    0.4270 H   0  0  0  0  0  0
    1.4516   -3.1688   -1.0525 F   0  0  0  0  0  0
   -4.7353   -0.0759   -2.9409 H   0  0  0  0  0  0
   -4.0688   -1.8202   -1.6606 H   0  0  0  0  0  0
   -2.9414   -0.4562   -1.6121 H   0  0  0  0  0  0
    2.3327    0.2585   -2.4145 H   0  0  0  0  0  0
   -0.5806   -3.0840    0.5510 H   0  0  0  0  0  0
   -5.6472    0.9762    1.5380 H   0  0  0  0  0  0
  1  2  1  0  0  0
  1 22  1  0  0  0
  2  3  1  0  0  0
  2 23  1  0  0  0
  2 24  1  0  0  0
  3  4  1  0  0  0
  4  5  1  0  0  0
  5  6  1  0  0  0
  6  7  1  0  0  0
  6 15  1  0  0  0
  7  8  1  0  0  0
  8  9  2  0  0  0
  9 10  1  0  0  0
 10 11  2  0  0  0
 10 12  1  0  0  0
 11 25  1  0  0  0
 12 13  2  0  0  0
 13 14  1  0  0  0
 13 26  1  0  0  0
 14  5  1  0  0  0
 14  8  1  0  0  0
 15  3  1  0  0  0
 15 16  1  0  0  0
 16 27  1  0  0  0
 17  5  1  0  0  0
 18  6  1  0  0  0
 19 15  1  0  0  0
 20  3  1  0  0  0
 21 12  1  0  0  0
M  END
$$$$
Molecule-050-Nadolol
  Cerius2 10300711153D 1   1.00000                          

 49 50  0  0  0  0  0  0  0  0999 V2000
   -8.3595   -3.0236    1.1028 C   0  0  0  0  0  0
   -6.8689   -3.3606    1.4153 C   0  0  0  0  0  0
   -6.6036   -4.8480    1.0323 C   0  0  0  0  0  0
   -6.6125   -3.1264    2.9364 C   0  0  0  0  0  0
   -6.0929   -2.4411    0.5296 N   0  0  0  0  0  0
   -4.6878   -2.0287    0.7860 C   0  0  0  0  0  0
   -3.6031   -3.1094    0.5061 C   0  0  0  0  0  0
   -3.4139   -3.9145    1.6720 O   0  0  0  0  0  0
   -2.2298   -2.5033    0.1179 C   0  0  0  0  0  0
   -2.3178   -1.8554   -1.1612 O   0  0  0  0  0  0
   -1.9083   -0.6125   -1.5471 C   0  0  0  0  0  0
   -2.8437    0.0807   -2.3388 C   0  0  0  0  0  0
   -2.5757    1.3786   -2.7958 C   0  0  0  0  0  0
   -1.3601    1.9951   -2.4668 C   0  0  0  0  0  0
   -0.3906    1.3174   -1.6923 C   0  0  0  0  0  0
    0.8886    2.0313   -1.4040 C   0  0  0  0  0  0
    1.8255    1.3212   -0.3920 C   0  0  0  0  0  0
    1.4024    1.6075    0.9435 O   0  0  0  0  0  0
    1.8377   -0.2056   -0.6487 C   0  0  0  0  0  0
    2.7207   -0.8501    0.2717 O   0  0  0  0  0  0
    0.4043   -0.7841   -0.5198 C   0  0  0  0  0  0
   -0.6486   -0.0152   -1.2490 C   0  0  0  0  0  0
   -8.5758   -1.9792    1.3407 H   0  0  0  0  0  0
   -8.5805   -3.1806    0.0440 H   0  0  0  0  0  0
   -9.0358   -3.6522    1.6869 H   0  0  0  0  0  0
   -5.5914   -5.1493    1.2929 H   0  0  0  0  0  0
   -7.2918   -5.5121    1.5602 H   0  0  0  0  0  0
   -6.7374   -4.9990   -0.0411 H   0  0  0  0  0  0
   -5.5932   -3.4039    3.2071 H   0  0  0  0  0  0
   -6.7619   -2.0753    3.1920 H   0  0  0  0  0  0
   -7.2934   -3.7282    3.5424 H   0  0  0  0  0  0
   -4.5751   -1.6352    1.7978 H   0  0  0  0  0  0
   -4.5277   -1.1856    0.1120 H   0  0  0  0  0  0
   -3.9398   -3.7502   -0.3136 H   0  0  0  0  0  0
   -1.9170   -1.8120    0.9029 H   0  0  0  0  0  0
   -1.4926   -3.3051    0.0404 H   0  0  0  0  0  0
   -3.7358   -0.3589   -2.5792 H   0  0  0  0  0  0
   -3.2659    1.8753   -3.3645 H   0  0  0  0  0  0
   -1.1852    2.9462   -2.8030 H   0  0  0  0  0  0
    1.4241    2.1527   -2.3499 H   0  0  0  0  0  0
    0.6707    3.0317   -1.0185 H   0  0  0  0  0  0
    2.8411    1.7122   -0.5073 H   0  0  0  0  0  0
    2.2135   -0.3923   -1.6603 H   0  0  0  0  0  0
    0.4346   -1.8102   -0.8949 H   0  0  0  0  0  0
    0.1418   -0.8121    0.5391 H   0  0  0  0  0  0
   -6.1597   -2.7864   -0.4308 H   0  0  0  0  0  0
   -2.8044   -4.6351    1.4036 H   0  0  0  0  0  0
    2.0121    1.0869    1.5116 H   0  0  0  0  0  0
    2.7047   -1.8011    0.0297 H   0  0  0  0  0  0
  1  2  1  0  0  0
  1 23  1  0  0  0
  1 24  1  0  0  0
  1 25  1  0  0  0
  2  3  1  0  0  0
  2  4  1  0  0  0
  2  5  1  0  0  0
  3 26  1  0  0  0
  3 27  1  0  0  0
  3 28  1  0  0  0
  4 29  1  0  0  0
  4 30  1  0  0  0
  4 31  1  0  0  0
  5  6  1  0  0  0
  5 46  1  0  0  0
  6  7  1  0  0  0
  6 32  1  0  0  0
  6 33  1  0  0  0
  7  8  1  0  0  0
  7  9  1  0  0  0
  7 34  1  0  0  0
  8 47  1  0  0  0
  9 10  1  0  0  0
  9 35  1  0  0  0
  9 36  1  0  0  0
 10 11  1  0  0  0
 11 12  2  0  0  0
 12 13  1  0  0  0
 12 37  1  0  0  0
 13 14  2  0  0  0
 13 38  1  0  0  0
 14 15  1  0  0  0
 14 39  1  0  0  0
 15 16  1  0  0  0
 16 17  1  0  0  0
 16 40  1  0  0  0
 16 41  1  0  0  0
 17 18  1  0  0  0
 17 19  1  0  0  0
 17 42  1  0  0  0
 18 48  1  0  0  0
 19 20  1  0  0  0
 19 21  1  0  0  0
 19 43  1  0  0  0
 20 49  1  0  0  0
 21 22  1  0  0  0
 21 44  1  0  0  0
 21 45  1  0  0  0
 22 11  1  0  0  0
 22 15  2  0  0  0
M  END
$$$$
Molecule-051-Dihydroergotamine
  Cerius2 10300711153D 1   1.00000                          
Structure written by Cerius2 SD Exporter
 80 87  0  0  0  0  0  0  0  0999 V2000
   -4.3978   -1.5370   -1.9843 C   0  0  0  0  0  0
   -5.0755   -1.0352   -3.0832 C   0  0  0  0  0  0
   -4.4544   -0.0868   -3.9107 C   0  0  0  0  0  0
   -4.9418    0.2949   -4.7233 H   0  0  0  0  0  0
    2.6253   -2.9875   -2.6395 C   0  0  0  0  0  0
    2.4481   -3.9932   -2.6865 H   0  0  0  0  0  0
   -3.1398    0.3223   -3.5866 C   0  0  0  0  0  0
   -2.6676    1.0137   -4.1739 H   0  0  0  0  0  0
    3.9423   -2.5009   -2.7191 C   0  0  0  0  0  0
    4.7221   -3.1538   -2.8237 H   0  0  0  0  0  0
    1.5527   -2.0896   -2.4982 C   0  0  0  0  0  0
    0.5943   -2.4426   -2.4456 H   0  0  0  0  0  0
   -2.4676   -0.2176   -2.4604 C   0  0  0  0  0  0
   -1.5175    0.0986   -2.2724 H   0  0  0  0  0  0
    4.1874   -1.1167   -2.6523 C   0  0  0  0  0  0
    5.1521   -0.7816   -2.7121 H   0  0  0  0  0  0
    1.7996   -0.7061   -2.4310 C   0  0  0  0  0  0
    1.0085   -0.0680   -2.3298 H   0  0  0  0  0  0
   -3.0938   -1.1761   -1.6177 C   0  0  0  0  0  0
   -5.2160   -2.4295   -1.3266 C   0  0  0  0  0  0
    3.1196   -0.2007   -2.4975 C   0  0  0  0  0  0
   -6.3968   -2.4732   -2.0689 C   0  0  0  0  0  0
   -7.2148   -3.0469   -1.8546 H   0  0  0  0  0  0
    0.2624   -1.0076    2.1492 C   0  0  0  0  0  0
    4.2825    3.1823   -1.0687 C   0  0  0  0  0  0
    3.4729    0.1054    0.7610 C   0  0  0  0  0  0
    3.2015   -0.3552    3.2044 C   0  0  0  0  0  0
    4.0537    0.2990    3.4013 H   0  0  0  0  0  0
    2.5071   -0.2613    4.0395 H   0  0  0  0  0  0
    3.5535   -1.3879    3.1603 H   0  0  0  0  0  0
   -4.7863   -3.1112   -0.0907 C   0  0  0  0  0  0
   -5.6496   -3.1723    0.5751 H   0  0  0  0  0  0
   -4.4645   -4.1236   -0.3442 H   0  0  0  0  0  0
    3.3844    1.2616   -2.3998 C   0  0  0  0  0  0
    4.0033    1.5460   -3.2560 H   0  0  0  0  0  0
    2.4495    1.8217   -2.4973 H   0  0  0  0  0  0
    2.2880    5.7535    0.4294 C   0  0  0  0  0  0
    1.5411    5.8094   -0.3686 H   0  0  0  0  0  0
    2.3124    6.7092    0.9598 H   0  0  0  0  0  0
   -1.3875   -1.0764    0.2925 C   0  0  0  0  0  0
   -0.5771   -0.8858   -0.4137 H   0  0  0  0  0  0
   -1.7891   -0.1107    0.6178 H   0  0  0  0  0  0
    1.9577    4.5797    1.3748 C   0  0  0  0  0  0
    2.1078    4.8770    2.4168 H   0  0  0  0  0  0
    0.9159    4.2725    1.2529 H   0  0  0  0  0  0
   -2.5084   -1.8833   -0.4236 C   0  0  0  0  0  0
   -0.7933   -1.8393    1.5098 C   0  0  0  0  0  0
    2.5109    0.0379    1.8718 C   0  0  0  0  0  0
    4.0892    1.6969   -1.0738 C   0  0  0  0  0  0
    5.0899    1.2539   -1.0432 H   0  0  0  0  0  0
   -3.6149   -2.3314    0.6201 C   0  0  0  0  0  0
   -4.0647   -1.4175    1.0300 H   0  0  0  0  0  0
    2.9566    3.4610    0.9849 C   0  0  0  0  0  0
    3.6863    3.3543    1.7964 H   0  0  0  0  0  0
    3.6621    5.4101   -0.1716 C   0  0  0  0  0  0
    3.7578    5.8271   -1.1790 H   0  0  0  0  0  0
    4.4675    5.7994    0.4587 H   0  0  0  0  0  0
   -1.9331   -2.2819    2.4712 C   0  0  0  0  0  0
   -1.4737   -2.8804    3.2645 H   0  0  0  0  0  0
   -2.3922   -1.4041    2.9400 H   0  0  0  0  0  0
    2.3481    2.0500    0.7231 C   0  0  0  0  0  0
   -3.9426   -3.6854    2.7482 C   0  0  0  0  0  0
   -4.5524   -4.4550    2.2743 H   0  0  0  0  0  0
   -3.4153   -4.1788    3.5678 H   0  0  0  0  0  0
   -4.5993   -2.9200    3.1688 H   0  0  0  0  0  0
   -6.2848   -1.6219   -3.1135 N   0  0  0  0  0  0
   -6.9704   -1.4588   -3.7817 H   0  0  0  0  0  0
    1.4385   -0.8404    1.4969 N   0  0  0  0  0  0
    1.5587   -1.3516    0.6812 H   0  0  0  0  0  0
    3.6725    3.9835   -0.1446 N   0  0  0  0  0  0
   -2.9830   -3.0896    1.7652 N   0  0  0  0  0  0
    3.3437    1.2604    0.0929 N   0  0  0  0  0  0
    0.0485   -0.4386    3.2453 O   0  0  0  0  0  0
    5.0042    3.6894   -1.9617 O   0  0  0  0  0  0
    4.2770   -0.8089    0.4642 O   0  0  0  0  0  0
    2.0211    1.3881    1.9543 O   0  0  0  0  0  0
   -2.0484   -2.7966   -0.8158 H   0  0  0  0  0  0
   -0.3140   -2.7552    1.1477 H   0  0  0  0  0  0
    1.1821    2.0701   -0.0927 O   0  0  0  0  0  0
    0.8556    1.1500   -0.0334 H   0  0  0  0  0  0
  1  2  2  0  0  0
  1 19  1  0  0  0
  1 20  1  0  0  0
  2  3  1  0  0  0
  2 66  1  0  0  0
  3  4  1  0  0  0
  3  7  2  0  0  0
  5  6  1  0  0  0
  5  9  1  0  0  0
  5 11  2  0  0  0
  7  8  1  0  0  0
  7 13  1  0  0  0
  9 10  1  0  0  0
  9 15  2  0  0  0
 11 12  1  0  0  0
 11 17  1  0  0  0
 13 14  1  0  0  0
 13 19  2  0  0  0
 15 16  1  0  0  0
 15 21  1  0  0  0
 17 18  1  0  0  0
 17 21  2  0  0  0
 19 46  1  0  0  0
 20 22  2  0  0  0
 20 31  1  0  0  0
 21 34  1  0  0  0
 22 23  1  0  0  0
 22 66  1  0  0  0
 24 47  1  0  0  0
 24 68  1  0  0  0
 24 73  2  0  0  0
 25 49  1  0  0  0
 25 70  1  0  0  0
 25 74  2  0  0  0
 26 48  1  0  0  0
 26 72  1  0  0  0
 26 75  2  0  0  0
 27 28  1  0  0  0
 27 29  1  0  0  0
 27 30  1  0  0  0
 27 48  1  0  0  0
 31 32  1  0  0  0
 31 33  1  0  0  0
 31 51  1  0  0  0
 34 35  1  0  0  0
 34 36  1  0  0  0
 34 49  1  0  0  0
 37 38  1  0  0  0
 37 39  1  0  0  0
 37 43  1  0  0  0
 37 55  1  0  0  0
 40 41  1  0  0  0
 40 42  1  0  0  0
 40 46  1  0  0  0
 40 47  1  0  0  0
 43 44  1  0  0  0
 43 45  1  0  0  0
 43 53  1  0  0  0
 46 51  1  0  0  0
 47 58  1  0  0  0
 48 68  1  0  0  0
 48 76  1  0  0  0
 49 50  1  0  0  0
 49 72  1  0  0  0
 51 52  1  0  0  0
 51 71  1  0  0  0
 53 54  1  0  0  0
 53 61  1  0  0  0
 53 70  1  0  0  0
 55 56  1  0  0  0
 55 57  1  0  0  0
 55 70  1  0  0  0
 58 59  1  0  0  0
 58 60  1  0  0  0
 58 71  1  0  0  0
 61 72  1  0  0  0
 61 76  1  0  0  0
 62 63  1  0  0  0
 62 64  1  0  0  0
 62 65  1  0  0  0
 62 71  1  0  0  0
 66 67  1  0  0  0
 68 69  1  0  0  0
 77 46  1  0  0  0
 78 47  1  0  0  0
 79 61  1  0  0  0
 79 80  1  0  0  0
M  END
$$$$
Molecule-052-Sulpiride
  Cerius2 10300711153D 1   1.00000                          

 46 47  0  0  0  0  0  0  0  0999 V2000
   -6.3374    3.6397    0.6568 C   0  0  0  0  0  0
   -7.1960    2.3600    0.7643 C   0  0  0  0  0  0
   -6.7576    1.2596   -0.1545 N   0  0  0  0  0  0
   -7.7198    0.1285   -0.2596 C   0  0  0  0  0  0
   -7.0698   -1.0531    0.4717 C   0  0  0  0  0  0
   -5.5862   -0.8693    0.1406 C   0  0  0  0  0  0
   -5.4034    0.6703    0.1024 C   0  0  0  0  0  0
   -4.3913    1.1432   -0.9775 C   0  0  0  0  0  0
   -3.0902    0.5864   -0.7423 N   0  0  0  0  0  0
   -1.9638    1.2401   -0.3613 C   0  0  0  0  0  0
   -2.0402    2.4807   -0.1849 O   0  0  0  0  0  0
   -0.7195    0.5796   -0.1656 C   0  0  0  0  0  0
    0.4788    1.3479   -0.1852 C   0  0  0  0  0  0
    1.7511    0.7658    0.0000 C   0  0  0  0  0  0
    1.8374   -0.6237    0.2016 C   0  0  0  0  0  0
    0.6738   -1.4066    0.2288 C   0  0  0  0  0  0
   -0.6046   -0.8267    0.0547 C   0  0  0  0  0  0
   -1.7249   -1.6085    0.1129 O   0  0  0  0  0  0
   -1.8699   -3.0170    0.3350 C   0  0  0  0  0  0
    3.1927    1.7560   -0.0246 S   0  0  0  0  0  0
    4.4528    1.0052    0.5856 O   0  0  0  0  0  0
    2.9427    3.1244    0.7409 O   0  0  0  0  0  0
    3.5572    2.1452   -1.5728 N   0  0  0  0  0  0
   -6.7796    4.4336    1.2618 H   0  0  0  0  0  0
   -5.3238    3.4596    1.0179 H   0  0  0  0  0  0
   -6.2933    3.9753   -0.3809 H   0  0  0  0  0  0
   -7.1982    2.0123    1.8019 H   0  0  0  0  0  0
   -8.2195    2.6501    0.5091 H   0  0  0  0  0  0
   -8.7102    0.3382    0.1557 H   0  0  0  0  0  0
   -7.8454   -0.1160   -1.3185 H   0  0  0  0  0  0
   -7.2344   -0.9680    1.5501 H   0  0  0  0  0  0
   -7.4531   -2.0136    0.1180 H   0  0  0  0  0  0
   -5.3732   -1.3242   -0.8320 H   0  0  0  0  0  0
   -4.9491   -1.3372    0.8961 H   0  0  0  0  0  0
   -5.0272    0.9802    1.0846 H   0  0  0  0  0  0
   -4.7331    0.8185   -1.9636 H   0  0  0  0  0  0
   -4.3671    2.2345   -0.9944 H   0  0  0  0  0  0
   -3.0042   -0.3695   -0.8518 H   0  0  0  0  0  0
    0.4321    2.3595   -0.3424 H   0  0  0  0  0  0
    2.7456   -1.0783    0.3332 H   0  0  0  0  0  0
    0.7705   -2.4114    0.3823 H   0  0  0  0  0  0
   -2.9299   -3.2704    0.3071 H   0  0  0  0  0  0
   -1.4697   -3.2909    1.3125 H   0  0  0  0  0  0
   -1.3545   -3.5801   -0.4448 H   0  0  0  0  0  0
    3.3412    2.9931   -1.8963 H   0  0  0  0  0  0
    3.9944    1.5248   -2.1148 H   0  0  0  0  0  0
  1  2  1  0  0  0
  1 24  1  0  0  0
  1 25  1  0  0  0
  1 26  1  0  0  0
  2  3  1  0  0  0
  2 27  1  0  0  0
  2 28  1  0  0  0
  3  4  1  0  0  0
  4  5  1  0  0  0
  4 29  1  0  0  0
  4 30  1  0  0  0
  5  6  1  0  0  0
  5 31  1  0  0  0
  5 32  1  0  0  0
  6  7  1  0  0  0
  6 33  1  0  0  0
  6 34  1  0  0  0
  7  3  1  0  0  0
  7  8  1  0  0  0
  7 35  1  0  0  0
  8  9  1  0  0  0
  8 36  1  0  0  0
  8 37  1  0  0  0
  9 10  1  0  0  0
  9 38  1  0  0  0
 10 11  2  0  0  0
 10 12  1  0  0  0
 12 13  2  0  0  0
 13 14  1  0  0  0
 13 39  1  0  0  0
 14 15  2  0  0  0
 14 20  1  0  0  0
 15 16  1  0  0  0
 15 40  1  0  0  0
 16 17  2  0  0  0
 16 41  1  0  0  0
 17 12  1  0  0  0
 17 18  1  0  0  0
 18 19  1  0  0  0
 19 42  1  0  0  0
 19 43  1  0  0  0
 19 44  1  0  0  0
 20 21  2  0  0  0
 20 22  2  0  0  0
 20 23  1  0  0  0
 23 45  1  0  0  0
 23 46  1  0  0  0
M  END
$$$$
Molecule-053_Famotidine
  Cerius2 10300711153D 1   1.00000                          
Structure written by Cerius2 SD Exporter
 35 35  0  0  0  0  0  0  0  0999 V2000
    2.3313   -1.4149   -0.4427 C   0  0  0  0  0  0
    2.9143   -2.4175   -1.2113 C   0  0  0  0  0  0
    2.3818   -3.1454   -1.6904 H   0  0  0  0  0  0
    4.5068   -0.9131   -0.2784 C   0  0  0  0  0  0
   -3.3601    0.8888   -0.1156 C   0  0  0  0  0  0
    5.7363    0.8749    0.8409 C   0  0  0  0  0  0
   -1.9191    0.6557   -0.3590 C   0  0  0  0  0  0
   -1.4953    1.5057   -0.9014 H   0  0  0  0  0  0
   -1.4175    0.5982    0.6085 H   0  0  0  0  0  0
    0.8854   -1.2509   -0.2063 C   0  0  0  0  0  0
    0.4680   -2.1865    0.1704 H   0  0  0  0  0  0
    0.7277   -0.4725    0.5413 H   0  0  0  0  0  0
   -1.6529   -0.6379   -1.1724 C   0  0  0  0  0  0
   -1.9195   -1.5217   -0.5880 H   0  0  0  0  0  0
   -2.2774   -0.6277   -2.0684 H   0  0  0  0  0  0
   -6.4679   -0.9808   -0.0042 N   0  0  0  0  0  0
   -7.0101   -0.6410   -0.6821 H   0  0  0  0  0  0
   -6.3628   -1.8998    0.1105 H   0  0  0  0  0  0
    3.2500   -0.5879    0.0715 N   0  0  0  0  0  0
    5.6158   -0.2364    0.0866 N   0  0  0  0  0  0
   -4.0565    0.0096    0.6317 N   0  0  0  0  0  0
   -3.9597    1.9732   -0.6326 N   0  0  0  0  0  0
   -3.4614    2.5985   -1.1821 H   0  0  0  0  0  0
   -4.8926    2.1389   -0.4408 H   0  0  0  0  0  0
    4.7064    1.5355    1.3853 N   0  0  0  0  0  0
    4.8609    2.3297    1.9175 H   0  0  0  0  0  0
    3.8074    1.2102    1.2400 H   0  0  0  0  0  0
    6.9626    1.3554    1.0596 N   0  0  0  0  0  0
    7.0824    2.1528    1.5954 H   0  0  0  0  0  0
    7.7299    0.9031    0.6788 H   0  0  0  0  0  0
   -6.3905    1.4760    0.8373 O   0  0  0  0  0  0
   -5.9349   -0.5186    2.4698 O   0  0  0  0  0  0
    4.6393   -2.3196   -1.2856 S   0  0  0  0  0  0
   -5.7027    0.0513    1.0074 S   0  0  0  0  0  0
    0.0615   -0.7771   -1.7469 S   0  0  0  0  0  0
  1  2  2  0  0  0
  1 10  1  0  0  0
  1 19  1  0  0  0
  2  3  1  0  0  0
  2 33  1  0  0  0
  4 19  2  0  0  0
  4 20  1  0  0  0
  4 33  1  0  0  0
  5  7  1  0  0  0
  5 21  2  0  0  0
  5 22  1  0  0  0
  6 20  2  0  0  0
  6 25  1  0  0  0
  6 28  1  0  0  0
  7  8  1  0  0  0
  7  9  1  0  0  0
  7 13  1  0  0  0
 10 11  1  0  0  0
 10 12  1  0  0  0
 10 35  1  0  0  0
 13 14  1  0  0  0
 13 15  1  0  0  0
 13 35  1  0  0  0
 16 17  1  0  0  0
 16 18  1  0  0  0
 16 34  1  0  0  0
 21 34  1  0  0  0
 22 23  1  0  0  0
 22 24  1  0  0  0
 25 26  1  0  0  0
 25 27  1  0  0  0
 28 29  1  0  0  0
 28 30  1  0  0  0
 31 34  2  0  0  0
 32 34  2  0  0  0
M  END
$$$$
Molecule-054-Metaproterenol
  Cerius2 10300711153D 1   1.00000                          
Structure written by Cerius2 SD Exporter
 32 32  0  0  0  0  0  0  0  0999 V2000
   -1.8906    0.8010   -1.0775 C   0  0  0  0  0  0
   -1.4754    1.3177   -1.8565 H   0  0  0  0  0  0
   -1.9627    0.1902    1.2751 C   0  0  0  0  0  0
   -1.5989    0.2489    2.2293 H   0  0  0  0  0  0
   -3.6017   -0.7340   -0.2725 C   0  0  0  0  0  0
   -4.4125   -1.3291   -0.4519 H   0  0  0  0  0  0
   -1.3496    0.9177    0.2263 C   0  0  0  0  0  0
   -3.0796   -0.6298    1.0291 C   0  0  0  0  0  0
   -3.0074   -0.0181   -1.3270 C   0  0  0  0  0  0
    4.0166   -0.0675    0.3028 C   0  0  0  0  0  0
    4.0967    0.9693   -0.0250 H   0  0  0  0  0  0
    4.0338   -0.0916    1.3944 H   0  0  0  0  0  0
    4.8888   -0.6052   -0.0747 H   0  0  0  0  0  0
    2.6588   -2.2203    0.1006 C   0  0  0  0  0  0
    3.5142   -2.7380   -0.3389 H   0  0  0  0  0  0
    2.6709   -2.3769    1.1816 H   0  0  0  0  0  0
    1.7474   -2.6644   -0.3055 H   0  0  0  0  0  0
    2.7098   -0.7086   -0.2333 C   0  0  0  0  0  0
    2.6914   -0.6132   -1.3244 H   0  0  0  0  0  0
   -0.1638    1.7871    0.4863 C   0  0  0  0  0  0
    0.0297    1.8644    1.5611 H   0  0  0  0  0  0
    1.1360    1.2657   -0.1788 C   0  0  0  0  0  0
    1.0051    1.2193   -1.2631 H   0  0  0  0  0  0
    1.9341    1.9797    0.0357 H   0  0  0  0  0  0
    1.5025   -0.0707    0.3541 N   0  0  0  0  0  0
    0.7148   -0.6880    0.1415 H   0  0  0  0  0  0
   -3.6445   -1.3138    2.0502 O   0  0  0  0  0  0
   -4.4242   -1.8885    1.8978 H   0  0  0  0  0  0
   -3.5038   -0.1095   -2.5820 O   0  0  0  0  0  0
   -4.2834   -0.6726   -2.7731 H   0  0  0  0  0  0
   -0.4312    3.1104    0.0204 O   0  0  0  0  0  0
   -1.2321    3.4016    0.5072 H   0  0  0  0  0  0
  1  2  1  0  0  0
  1  7  2  0  0  0
  1  9  1  0  0  0
  3  4  1  0  0  0
  3  7  1  0  0  0
  3  8  2  0  0  0
  5  6  1  0  0  0
  5  8  1  0  0  0
  5  9  2  0  0  0
  7 20  1  0  0  0
  8 27  1  0  0  0
  9 29  1  0  0  0
 10 11  1  0  0  0
 10 12  1  0  0  0
 10 13  1  0  0  0
 10 18  1  0  0  0
 14 15  1  0  0  0
 14 16  1  0  0  0
 14 17  1  0  0  0
 14 18  1  0  0  0
 18 19  1  0  0  0
 18 25  1  0  0  0
 20 21  1  0  0  0
 20 22  1  0  0  0
 20 31  1  0  0  0
 22 23  1  0  0  0
 22 24  1  0  0  0
 22 25  1  0  0  0
 25 26  1  0  0  0
 27 28  1  0  0  0
 29 30  1  0  0  0
 31 32  1  0  0  0
M  END
$$$$
Molecule-055-Cymarin
  Cerius2 10300711153D 1   1.00000                          

 83 88  0  0  0  0  0  0  0  0999 V2000
   -8.6103   -0.7496    3.2773 C   0  0  0  0  0  0
   -7.5046   -0.8621    2.3641 O   0  0  0  0  0  0
   -7.7982   -1.2876    1.0078 C   0  0  0  0  0  0
   -6.4524   -1.7942    0.3934 C   0  0  0  0  0  0
   -5.6662   -0.6979   -0.3902 C   0  0  0  0  0  0
   -4.2519   -0.9754   -0.2914 O   0  0  0  0  0  0
   -3.3516   -0.1384   -1.0595 C   0  0  0  0  0  0
   -3.0806    1.2208   -0.3453 C   0  0  0  0  0  0
   -1.6394    1.7431   -0.5841 C   0  0  0  0  0  0
   -0.5101    0.7815   -0.0220 C   0  0  0  0  0  0
    0.8508    1.0278   -0.8201 C   0  0  0  0  0  0
    1.3529    2.5018   -0.9536 C   0  0  0  0  0  0
    2.4876    2.5902   -2.0025 C   0  0  0  0  0  0
    3.7216    1.6297   -1.7810 C   0  0  0  0  0  0
    4.8007    2.0781   -0.6962 C   0  0  0  0  0  0
    5.1631    0.7988    0.1120 C   0  0  0  0  0  0
    4.5804   -0.3784   -0.6844 C   0  0  0  0  0  0
    3.2741    0.1738   -1.3261 C   0  0  0  0  0  0
    2.0531    0.1443   -0.3129 C   0  0  0  0  0  0
    1.5732   -1.2889    0.1250 C   0  0  0  0  0  0
    0.2534   -1.7249   -0.5493 C   0  0  0  0  0  0
   -0.9430   -0.7633   -0.2106 C   0  0  0  0  0  0
   -2.0420   -0.9450   -1.3167 C   0  0  0  0  0  0
    4.5526    3.3024    0.1329 C   0  0  0  0  0  0
    4.6564    4.6079   -0.3471 C   0  0  0  0  0  0
    4.3932    5.4877    0.6883 C   0  0  0  0  0  0
    4.3950    6.7355    0.6042 O   0  0  0  0  0  0
    4.1379    4.7903    1.8145 O   0  0  0  0  0  0
    4.2238    3.3819    1.5735 C   0  0  0  0  0  0
   -5.9741    0.6138    0.1288 O   0  0  0  0  0  0
   -7.3635    1.0269    0.0466 C   0  0  0  0  0  0
   -8.3879   -0.1549    0.1124 C   0  0  0  0  0  0
   -9.6840    0.2714    0.5447 O   0  0  0  0  0  0
   -8.2072   -0.5597    4.2721 H   0  0  0  0  0  0
   -9.2593    0.0854    3.0155 H   0  0  0  0  0  0
   -9.1937   -1.6719    3.3170 H   0  0  0  0  0  0
   -5.8238   -2.1952    1.1937 H   0  0  0  0  0  0
   -6.6561   -2.6231   -0.2903 H   0  0  0  0  0  0
   -3.7864    0.0647   -2.0459 H   0  0  0  0  0  0
   -3.7938    1.9670   -0.7063 H   0  0  0  0  0  0
   -3.2453    1.1098    0.7291 H   0  0  0  0  0  0
   -1.5260    1.8656   -1.6658 H   0  0  0  0  0  0
   -1.5613    2.7479   -0.1539 H   0  0  0  0  0  0
    0.6332    0.7057   -1.8454 H   0  0  0  0  0  0
    0.5488    3.1575   -1.2910 H   0  0  0  0  0  0
    1.6986    2.8901    0.0020 H   0  0  0  0  0  0
    2.8181    3.6262   -2.0808 H   0  0  0  0  0  0
    2.0130    2.3617   -2.9632 H   0  0  0  0  0  0
    4.4486    1.5813   -3.1857 C   0  0  0  0  0  0
    6.2448    0.6837    0.2331 H   0  0  0  0  0  0
    4.7165    0.7933    1.1078 H   0  0  0  0  0  0
    5.2891   -0.6882   -1.4576 H   0  0  0  0  0  0
    4.4227   -1.2365   -0.0306 H   0  0  0  0  0  0
    2.9199   -0.6496   -2.4466 O   0  0  0  0  0  0
    2.3229   -2.0505   -0.0904 H   0  0  0  0  0  0
    1.4173   -1.3074    1.2084 H   0  0  0  0  0  0
    0.4327   -1.7560   -1.6281 H   0  0  0  0  0  0
    0.0173   -2.7493   -0.2440 H   0  0  0  0  0  0
   -2.2939   -2.0039   -1.4333 H   0  0  0  0  0  0
   -1.6233   -0.6199   -2.2743 H   0  0  0  0  0  0
    4.8927    4.8800   -1.3028 H   0  0  0  0  0  0
    3.2747    2.8957    1.8030 H   0  0  0  0  0  0
    5.0208    2.9564    2.1869 H   0  0  0  0  0  0
   -7.5518    1.9260   -1.1991 C   0  0  0  0  0  0
    2.8268   -1.5577   -2.0916 H   0  0  0  0  0  0
    5.3281    0.9360   -3.1663 H   0  0  0  0  0  0
    3.7899    1.2060   -3.9721 H   0  0  0  0  0  0
    4.7797    2.5804   -3.4807 H   0  0  0  0  0  0
   -9.9771    0.9404   -0.1100 H   0  0  0  0  0  0
   -6.8415    2.7547   -1.1675 H   0  0  0  0  0  0
   -7.3785    1.3563   -2.1135 H   0  0  0  0  0  0
   -8.5623    2.3377   -1.2248 H   0  0  0  0  0  0
   -0.3889    1.1147    1.4150 C   0  0  0  0  0  0
    0.5825    1.6415    1.9366 O   0  0  0  0  0  0
   -1.5253   -1.2966    0.9923 O   0  0  0  0  0  0
   -1.1515    0.9352    2.0234 H   0  0  0  0  0  0
   -1.9449   -2.1484    0.7429 H   0  0  0  0  0  0
    2.4168    0.6097    0.6048 H   0  0  0  0  0  0
    5.7362    2.3351   -1.2074 H   0  0  0  0  0  0
   -7.5298    1.6546    0.9269 H   0  0  0  0  0  0
   -8.5263   -0.5705   -0.8909 H   0  0  0  0  0  0
   -8.4977   -2.1308    1.0262 H   0  0  0  0  0  0
   -5.9590   -0.7486   -1.4457 H   0  0  0  0  0  0
  1  2  1  0  0  0
  1 34  1  0  0  0
  1 35  1  0  0  0
  1 36  1  0  0  0
  2  3  1  0  0  0
  3  4  1  0  0  0
  4  5  1  0  0  0
  4 37  1  0  0  0
  4 38  1  0  0  0
  5  6  1  0  0  0
  5 30  1  0  0  0
  6  7  1  0  0  0
  7  8  1  0  0  0
  7 39  1  0  0  0
  8  9  1  0  0  0
  8 40  1  0  0  0
  8 41  1  0  0  0
  9 10  1  0  0  0
  9 42  1  0  0  0
  9 43  1  0  0  0
 10 11  1  0  0  0
 11 12  1  0  0  0
 11 44  1  0  0  0
 12 13  1  0  0  0
 12 45  1  0  0  0
 12 46  1  0  0  0
 13 14  1  0  0  0
 13 47  1  0  0  0
 13 48  1  0  0  0
 14 15  1  0  0  0
 14 49  1  0  0  0
 15 16  1  0  0  0
 15 24  1  0  0  0
 16 17  1  0  0  0
 16 50  1  0  0  0
 16 51  1  0  0  0
 17 18  1  0  0  0
 17 52  1  0  0  0
 17 53  1  0  0  0
 18 14  1  0  0  0
 18 19  1  0  0  0
 18 54  1  0  0  0
 19 11  1  0  0  0
 19 20  1  0  0  0
 20 21  1  0  0  0
 20 55  1  0  0  0
 20 56  1  0  0  0
 21 22  1  0  0  0
 21 57  1  0  0  0
 21 58  1  0  0  0
 22 10  1  0  0  0
 22 23  1  0  0  0
 23  7  1  0  0  0
 23 59  1  0  0  0
 23 60  1  0  0  0
 24 25  2  0  0  0
 25 26  1  0  0  0
 25 61  1  0  0  0
 26 27  2  0  0  0
 26 28  1  0  0  0
 28 29  1  0  0  0
 29 24  1  0  0  0
 29 62  1  0  0  0
 29 63  1  0  0  0
 30 31  1  0  0  0
 31 32  1  0  0  0
 31 64  1  0  0  0
 32  3  1  0  0  0
 32 33  1  0  0  0
 33 69  1  0  0  0
 49 66  1  0  0  0
 49 67  1  0  0  0
 49 68  1  0  0  0
 54 65  1  0  0  0
 64 70  1  0  0  0
 64 71  1  0  0  0
 64 72  1  0  0  0
 73 10  1  0  0  0
 73 76  1  0  0  0
 74 73  2  0  0  0
 75 22  1  0  0  0
 75 77  1  0  0  0
 78 19  1  0  0  0
 79 15  1  0  0  0
 80 31  1  0  0  0
 81 32  1  0  0  0
 82  3  1  0  0  0
 83  5  1  0  0  0
M  END
$$$$
Molecule-056-Rimiterol
  Cerius2 10300711153D 1   1.00000                          

 33 34  0  0  0  0  0  0  0  0999 V2000
   -1.1299   -0.2434   -1.4835 C   0  0  0  0  0  0
    0.2877   -0.0827   -0.8458 C   0  0  0  0  0  0
    0.6916    1.4002   -0.5722 C   0  0  0  0  0  0
    2.0603    1.4894    0.1508 C   0  0  0  0  0  0
    2.0789    0.6135    1.4289 C   0  0  0  0  0  0
    1.6438   -0.8386    1.1125 C   0  0  0  0  0  0
    0.3370   -0.8722    0.4134 N   0  0  0  0  0  0
   -1.2388    0.3947   -2.8324 C   0  0  0  0  0  0
   -2.0054    1.5651   -3.0584 C   0  0  0  0  0  0
   -2.0677    2.1531   -4.3347 C   0  0  0  0  0  0
   -1.3663    1.5814   -5.4094 C   0  0  0  0  0  0
   -1.4282    2.1644   -6.6277 O   0  0  0  0  0  0
   -0.6063    0.4120   -5.2103 C   0  0  0  0  0  0
    0.0683   -0.1502   -6.2422 O   0  0  0  0  0  0
   -0.5481   -0.1733   -3.9317 C   0  0  0  0  0  0
   -2.1441    0.1949   -0.5718 O   0  0  0  0  0  0
    0.7561    1.9507   -1.5142 H   0  0  0  0  0  0
   -0.0646    1.8840    0.0511 H   0  0  0  0  0  0
    2.8522    1.1587   -0.5276 H   0  0  0  0  0  0
    2.2634    2.5293    0.4203 H   0  0  0  0  0  0
    3.0850    0.6095    1.8561 H   0  0  0  0  0  0
    1.3977    1.0395    2.1710 H   0  0  0  0  0  0
    2.4022   -1.3326    0.4986 H   0  0  0  0  0  0
    1.5517   -1.3995    2.0452 H   0  0  0  0  0  0
   -2.5234    2.0077   -2.2968 H   0  0  0  0  0  0
   -2.6224    2.9996   -4.4814 H   0  0  0  0  0  0
    0.0064   -1.0237   -3.8071 H   0  0  0  0  0  0
   -1.3201   -1.3134   -1.6147 H   0  0  0  0  0  0
   -0.3581   -0.4652    1.0443 H   0  0  0  0  0  0
   -0.9317    1.7640   -7.3726 H   0  0  0  0  0  0
    0.5970   -0.9652   -6.1104 H   0  0  0  0  0  0
   -1.9654    1.1439   -0.4101 H   0  0  0  0  0  0
    1.0211   -0.5171   -1.5338 H   0  0  0  0  0  0
  1  2  1  0  0  0
  1  8  1  0  0  0
  1 16  1  0  0  0
  1 28  1  0  0  0
  2  3  1  0  0  0
  3  4  1  0  0  0
  3 17  1  0  0  0
  3 18  1  0  0  0
  4  5  1  0  0  0
  4 19  1  0  0  0
  4 20  1  0  0  0
  5  6  1  0  0  0
  5 21  1  0  0  0
  5 22  1  0  0  0
  6  7  1  0  0  0
  6 23  1  0  0  0
  6 24  1  0  0  0
  7  2  1  0  0  0
  7 29  1  0  0  0
  8  9  2  0  0  0
  9 10  1  0  0  0
  9 25  1  0  0  0
 10 11  2  0  0  0
 10 26  1  0  0  0
 11 12  1  0  0  0
 11 13  1  0  0  0
 12 30  1  0  0  0
 13 14  1  0  0  0
 13 15  2  0  0  0
 14 31  1  0  0  0
 15  8  1  0  0  0
 15 27  1  0  0  0
 16 32  1  0  0  0
 33  2  1  0  0  0
M  END
$$$$
Molecule-057-Atenolol
  Cerius2 10300711153D 1   1.00000                          

 37 37  0  0  0  0  0  0  0  0999 V2000
   -8.1159   -0.4418    0.7516 C   0  0  0  0  0  0
   -7.2992   -1.0941   -0.3873 C   0  0  0  0  0  0
   -7.9926   -0.9106   -1.7597 C   0  0  0  0  0  0
   -5.9616   -0.4600   -0.3735 N   0  5  0  0  0  0
   -4.8558   -1.2129   -1.0555 C   0  0  0  0  0  0
   -3.4580   -0.5330   -0.9401 C   0  0  0  0  0  0
   -2.4912   -1.3007   -1.6955 O   0  5  0  0  0  0
   -2.9990   -0.3715    0.5387 C   0  0  0  0  0  0
   -2.0522    0.6855    0.7966 O   0  0  0  0  0  0
   -0.7043    0.7142    0.6013 C   0  0  0  0  0  0
   -0.0276    1.8660    1.0418 C   0  0  0  0  0  0
    1.3715    1.9612    0.9358 C   0  0  0  0  0  0
    2.1348    0.9063    0.3766 C   0  0  0  0  0  0
    3.6239    0.9352    0.2566 C   0  0  0  0  0  0
    4.3439    2.0005    0.9802 C   0  0  0  0  0  0
    5.0274    1.7434    1.9969 O   0  0  0  0  0  0
    4.3012    3.2689    0.5475 N   0  6  0  0  0  0
    1.4412   -0.2336   -0.0952 C   0  0  0  0  0  0
    0.0430   -0.3341    0.0240 C   0  0  0  0  0  0
   -7.6073   -0.5941    1.7056 H   0  0  0  0  0  0
   -8.2206    0.6316    0.5810 H   0  0  0  0  0  0
   -9.1091   -0.8898    0.8150 H   0  0  0  0  0  0
   -7.2148   -2.1635   -0.1667 H   0  0  0  0  0  0
   -7.4478   -1.4505   -2.5343 H   0  0  0  0  0  0
   -9.0114   -1.3005   -1.7274 H   0  0  0  0  0  0
   -8.0254    0.1469   -2.0283 H   0  0  0  0  0  0
   -4.7761   -2.2177   -0.6344 H   0  0  0  0  0  0
   -5.0803   -1.3115   -2.1187 H   0  0  0  0  0  0
   -3.8698   -0.1303    1.1498 H   0  0  0  0  0  0
   -2.6009   -1.3202    0.9001 H   0  0  0  0  0  0
   -0.5551    2.6396    1.4517 H   0  0  0  0  0  0
    1.8282    2.8138    1.2690 H   0  0  0  0  0  0
    4.0135   -0.0201    0.6154 H   0  0  0  0  0  0
    3.8883    1.0222   -0.7982 H   0  0  0  0  0  0
    1.9532   -1.0087   -0.5240 H   0  0  0  0  0  0
   -0.4229   -1.1780   -0.3090 H   0  0  0  0  0  0
   -3.5387    0.4604   -1.3853 H   0  0  0  0  0  0
  1  2  1  0  0  0
  1 20  1  0  0  0
  1 21  1  0  0  0
  1 22  1  0  0  0
  2  3  1  0  0  0
  2  4  1  0  0  0
  2 23  1  0  0  0
  3 24  1  0  0  0
  3 25  1  0  0  0
  3 26  1  0  0  0
  4  5  1  0  0  0
  5  6  1  0  0  0
  5 27  1  0  0  0
  5 28  1  0  0  0
  6  7  1  0  0  0
  6  8  1  0  0  0
  8  9  1  0  0  0
  8 29  1  0  0  0
  8 30  1  0  0  0
  9 10  1  0  0  0
 10 11  2  0  0  0
 11 12  1  0  0  0
 11 31  1  0  0  0
 12 13  2  0  0  0
 12 32  1  0  0  0
 13 14  1  0  0  0
 13 18  1  0  0  0
 14 15  1  0  0  0
 14 33  1  0  0  0
 14 34  1  0  0  0
 15 16  2  0  0  0
 15 17  1  0  0  0
 18 19  2  0  0  0
 18 35  1  0  0  0
 19 10  1  0  0  0
 19 36  1  0  0  0
 37  6  1  0  0  0
M  CHG  3   4  -1   7  -1  17  -2
M  END
$$$$
Molecule-058-Cefpodoxime_proxetil
  Cerius2 10300711153D 1   1.00000                          
Structure written by Cerius2 SD Exporter
 64 66  0  0  0  0  0  0  0  0999 V2000
   -7.1116   -1.1581    0.5215 C   0  0  0  0  0  0
   -8.3026   -0.7341   -0.0814 C   0  0  0  0  0  0
   -8.4100    0.1275   -0.6098 H   0  0  0  0  0  0
   -8.5879   -2.7812    1.0367 C   0  0  0  0  0  0
    0.7529   -2.3791   -0.8182 C   0  0  0  0  0  0
    0.6720   -1.2050   -0.0021 C   0  0  0  0  0  0
   -5.8445   -0.5131    0.5078 C   0  0  0  0  0  0
   -4.7194   -1.0197    1.2091 C   0  0  0  0  0  0
   -1.1144   -0.0929    1.4008 C   0  0  0  0  0  0
    1.6987   -0.2209    0.0523 C   0  0  0  0  0  0
    5.1475    2.3490    0.2858 C   0  0  0  0  0  0
    6.4180    5.2065    0.8824 C   0  0  0  0  0  0
    7.0701    5.9499    1.3455 H   0  0  0  0  0  0
    6.9087    4.8226   -0.0129 H   0  0  0  0  0  0
    5.4884    5.6971    0.5878 H   0  0  0  0  0  0
    7.3866    3.3073    2.3366 C   0  0  0  0  0  0
    7.9048    2.8666    1.4837 H   0  0  0  0  0  0
    8.0704    3.9901    2.8451 H   0  0  0  0  0  0
    7.1145    2.5096    3.0302 H   0  0  0  0  0  0
    3.6577    1.4213   -2.3796 C   0  0  0  0  0  0
    3.4794    0.7094   -3.1877 H   0  0  0  0  0  0
    2.8021    2.0952   -2.3094 H   0  0  0  0  0  0
    4.5467    2.0044   -2.6219 H   0  0  0  0  0  0
   -2.2961   -0.8956    1.7160 C   0  0  0  0  0  0
   -2.3728   -1.0686    2.7931 H   0  0  0  0  0  0
    6.1131    4.0623    1.8813 C   0  0  0  0  0  0
    5.6764    4.5222    2.7728 H   0  0  0  0  0  0
   -1.5224   -2.0119    0.9518 C   0  0  0  0  0  0
    2.0208   -2.8775   -1.4292 C   0  0  0  0  0  0
    2.8743   -2.6357   -0.7911 H   0  0  0  0  0  0
    2.0003   -3.9694   -1.5048 H   0  0  0  0  0  0
    3.8443    0.6713   -1.0430 C   0  0  0  0  0  0
    4.7162    0.0143   -1.1185 H   0  0  0  0  0  0
   -0.4535   -3.2268   -1.1115 C   0  0  0  0  0  0
   -0.4950   -3.4299   -2.1840 H   0  0  0  0  0  0
   -0.3420   -4.1832   -0.5959 H   0  0  0  0  0  0
    3.3594   -2.6660   -3.4368 C   0  0  0  0  0  0
    4.2457   -2.3398   -2.8880 H   0  0  0  0  0  0
    3.4077   -3.7443   -3.6034 H   0  0  0  0  0  0
    3.3576   -2.1693   -4.4071 H   0  0  0  0  0  0
   -5.9500    2.5161   -1.5981 C   0  0  0  0  0  0
   -5.6557    3.2584   -0.8547 H   0  0  0  0  0  0
   -5.1034    2.2973   -2.2509 H   0  0  0  0  0  0
   -6.7682    2.9166   -2.1964 H   0  0  0  0  0  0
   -3.5052   -0.4170    1.1145 N   0  0  0  0  0  0
   -3.4453    0.3855    0.5715 H   0  0  0  0  0  0
   -7.3356   -2.3275    1.1462 N   0  0  0  0  0  0
   -5.6003    0.6291   -0.1853 N   0  0  0  0  0  0
   -8.9745   -3.9331    1.5967 N   0  0  0  0  0  0
   -8.3367   -4.4611    2.1011 H   0  0  0  0  0  0
   -9.8892   -4.2392    1.4981 H   0  0  0  0  0  0
   -0.4809   -1.0690    0.7285 N   0  0  0  0  0  0
   -4.7970   -2.0413    1.9343 O   0  0  0  0  0  0
   -0.8655    1.1093    1.6391 O   0  0  0  0  0  0
    1.7044    0.6500    0.9512 O   0  0  0  0  0  0
    6.1494    2.2944   -0.4650 O   0  0  0  0  0  0
    2.7023   -0.1849   -0.8708 O   0  0  0  0  0  0
    5.1111    3.1602    1.3761 O   0  0  0  0  0  0
    4.0496    1.5850    0.0466 O   0  0  0  0  0  0
    2.1537   -2.3018   -2.7434 O   0  0  0  0  0  0
   -6.3896    1.3258   -0.9515 O   0  0  0  0  0  0
   -9.6625   -1.7842    0.1256 S   0  0  0  0  0  0
   -2.0814   -2.5555   -0.6750 S   0  0  0  0  0  0
   -1.2200   -2.8440    1.5982 H   0  0  0  0  0  0
  1  2  2  0  0  0
  1  7  1  0  0  0
  1 47  1  0  0  0
  2  3  1  0  0  0
  2 62  1  0  0  0
  4 47  2  0  0  0
  4 49  1  0  0  0
  4 62  1  0  0  0
  5  6  2  0  0  0
  5 29  1  0  0  0
  5 34  1  0  0  0
  6 10  1  0  0  0
  6 52  1  0  0  0
  7  8  1  0  0  0
  7 48  2  0  0  0
  8 45  1  0  0  0
  8 53  2  0  0  0
  9 24  1  0  0  0
  9 52  1  0  0  0
  9 54  2  0  0  0
 10 55  2  0  0  0
 10 57  1  0  0  0
 11 56  2  0  0  0
 11 58  1  0  0  0
 11 59  1  0  0  0
 12 13  1  0  0  0
 12 14  1  0  0  0
 12 15  1  0  0  0
 12 26  1  0  0  0
 16 17  1  0  0  0
 16 18  1  0  0  0
 16 19  1  0  0  0
 16 26  1  0  0  0
 20 21  1  0  0  0
 20 22  1  0  0  0
 20 23  1  0  0  0
 20 32  1  0  0  0
 24 25  1  0  0  0
 24 28  1  0  0  0
 24 45  1  0  0  0
 26 27  1  0  0  0
 26 58  1  0  0  0
 28 52  1  0  0  0
 28 63  1  0  0  0
 29 30  1  0  0  0
 29 31  1  0  0  0
 29 60  1  0  0  0
 32 33  1  0  0  0
 32 57  1  0  0  0
 32 59  1  0  0  0
 34 35  1  0  0  0
 34 36  1  0  0  0
 34 63  1  0  0  0
 37 38  1  0  0  0
 37 39  1  0  0  0
 37 40  1  0  0  0
 37 60  1  0  0  0
 41 42  1  0  0  0
 41 43  1  0  0  0
 41 44  1  0  0  0
 41 61  1  0  0  0
 45 46  1  0  0  0
 48 61  1  0  0  0
 49 50  1  0  0  0
 49 51  1  0  0  0
 64 28  1  0  0  0
M  END
$$$$
Molecule-059-Guanoxan
  Cerius2 10300711153D 1   1.00000                          
Structure written by Cerius2 SD Exporter
 28 29  0  0  0  0  0  0  0  0999 V2000
    4.5549   -0.5798    0.4349 C   0  0  0  0  0  0
    5.4798   -1.0029    0.5427 H   0  0  0  0  0  0
    4.4174    0.8222    0.4433 C   0  0  0  0  0  0
    5.2416    1.4157    0.5598 H   0  0  0  0  0  0
    3.4202   -1.4000    0.2827 C   0  0  0  0  0  0
    3.5178   -2.4174    0.2837 H   0  0  0  0  0  0
    3.1467    1.4087    0.2873 C   0  0  0  0  0  0
    3.0471    2.4259    0.2869 H   0  0  0  0  0  0
    2.1477   -0.8171    0.1397 C   0  0  0  0  0  0
    2.0137    0.5915    0.1205 C   0  0  0  0  0  0
   -3.8306   -0.0654   -0.0000 C   0  0  0  0  0  0
   -0.3629    0.3728   -0.5024 C   0  0  0  0  0  0
   -0.2887    0.2789   -1.5904 H   0  0  0  0  0  0
   -1.6603    1.1441   -0.1571 C   0  0  0  0  0  0
   -1.7153    1.2843    0.9248 H   0  0  0  0  0  0
   -1.6071    2.1380   -0.6071 H   0  0  0  0  0  0
   -0.3035   -1.0610    0.1070 C   0  0  0  0  0  0
   -0.5899   -1.0299    1.1608 H   0  0  0  0  0  0
   -0.9880   -1.7302   -0.4179 H   0  0  0  0  0  0
   -4.8320   -0.6228   -0.6876 N   0  0  0  0  0  0
   -4.8141   -0.6168   -1.6554 H   0  0  0  0  0  0
   -3.9071   -0.1039    1.3360 N   0  0  0  0  0  0
   -4.6719   -0.5245    1.7567 H   0  0  0  0  0  0
   -3.2086    0.2835    1.8810 H   0  0  0  0  0  0
   -2.8158    0.4891   -0.6934 N   0  0  0  0  0  0
   -2.8791    0.4404   -1.6599 H   0  0  0  0  0  0
    1.0330   -1.5942    0.0259 O   0  0  0  0  0  0
    0.7787    1.1394   -0.0630 O   0  0  0  0  0  0
  1  2  1  0  0  0
  1  3  1  0  0  0
  1  5  2  0  0  0
  3  4  1  0  0  0
  3  7  2  0  0  0
  5  6  1  0  0  0
  5  9  1  0  0  0
  7  8  1  0  0  0
  7 10  1  0  0  0
  9 10  2  0  0  0
  9 27  1  0  0  0
 10 28  1  0  0  0
 11 20  2  0  0  0
 11 22  1  0  0  0
 11 25  1  0  0  0
 12 13  1  0  0  0
 12 14  1  0  0  0
 12 17  1  0  0  0
 12 28  1  0  0  0
 14 15  1  0  0  0
 14 16  1  0  0  0
 14 25  1  0  0  0
 17 18  1  0  0  0
 17 19  1  0  0  0
 17 27  1  0  0  0
 20 21  1  0  0  0
 22 23  1  0  0  0
 22 24  1  0  0  0
 25 26  1  0  0  0
M  END
$$$$
Molecule-060-Trandolapril
  Cerius2 10300711153D 1   1.00000                          
Structure written by Cerius2 SD Exporter
 65 67  0  0  0  0  0  0  0  0999 V2000
    4.5219    5.5517    0.5369 C   0  0  0  0  0  0
    4.7610    6.5174    0.2981 H   0  0  0  0  0  0
    3.1817    5.1935    0.7666 C   0  0  0  0  0  0
    2.4446    5.8984    0.6952 H   0  0  0  0  0  0
    5.5334    4.5801    0.6377 C   0  0  0  0  0  0
    6.5086    4.8398    0.4718 H   0  0  0  0  0  0
    2.8538    3.8656    1.0972 C   0  0  0  0  0  0
    1.8733    3.6271    1.2671 H   0  0  0  0  0  0
    5.2047    3.2511    0.9667 C   0  0  0  0  0  0
    5.9565    2.5606    1.0338 H   0  0  0  0  0  0
    3.8596    2.8742    1.1985 C   0  0  0  0  0  0
   -0.4247   -2.0119   -0.7727 C   0  0  0  0  0  0
   -3.2529   -3.4081   -0.5846 C   0  0  0  0  0  0
    1.2208   -0.8127    1.7905 C   0  0  0  0  0  0
    0.9955   -1.4316   -2.7479 C   0  0  0  0  0  0
    1.8001   -0.7802   -3.0952 H   0  0  0  0  0  0
    1.2899   -2.4689   -2.9238 H   0  0  0  0  0  0
    0.1032   -1.2159   -3.3395 H   0  0  0  0  0  0
    0.0559   -3.8088    3.7157 C   0  0  0  0  0  0
   -0.2278   -4.3656    2.8204 H   0  0  0  0  0  0
    1.0501   -4.1292    4.0325 H   0  0  0  0  0  0
   -0.6575   -4.0314    4.5112 H   0  0  0  0  0  0
    3.4977    1.4725    1.5497 C   0  0  0  0  0  0
    2.8889    1.4915    2.4568 H   0  0  0  0  0  0
    4.3956    0.8936    1.7842 H   0  0  0  0  0  0
   -3.6584    2.2454   -0.5697 C   0  0  0  0  0  0
   -2.8126    2.7584   -0.1024 H   0  0  0  0  0  0
   -4.4502    2.9869   -0.7068 H   0  0  0  0  0  0
   -3.1902    1.7240   -1.9640 C   0  0  0  0  0  0
   -4.0720    1.3671   -2.5041 H   0  0  0  0  0  0
   -2.7764    2.5559   -2.5409 H   0  0  0  0  0  0
   -4.1587    1.1152    0.3918 C   0  0  0  0  0  0
   -3.8328    1.3403    1.4110 H   0  0  0  0  0  0
   -5.2521    1.0893    0.3939 H   0  0  0  0  0  0
   -3.6083   -1.4320    0.9689 C   0  0  0  0  0  0
   -3.2256   -1.0847    1.9337 H   0  0  0  0  0  0
   -4.6007   -1.8687    1.1146 H   0  0  0  0  0  0
    2.7342    0.7476    0.4028 C   0  0  0  0  0  0
    1.8605    1.3382    0.1177 H   0  0  0  0  0  0
    3.3970    0.7063   -0.4667 H   0  0  0  0  0  0
   -2.1407    0.5606   -1.8787 C   0  0  0  0  0  0
   -2.3333   -0.1560   -2.6818 H   0  0  0  0  0  0
   -1.1580    0.9953   -2.0581 H   0  0  0  0  0  0
   -3.6263   -0.2808   -0.0414 C   0  0  0  0  0  0
   -4.2568   -0.6120   -0.8773 H   0  0  0  0  0  0
    0.7251   -1.1835   -1.2426 C   0  0  0  0  0  0
    0.5048   -0.1280   -1.1275 H   0  0  0  0  0  0
    2.2834   -0.7081    0.7548 C   0  0  0  0  0  0
    3.1574   -1.2064    1.1818 H   0  0  0  0  0  0
   -2.6025   -2.4072    0.3052 C   0  0  0  0  0  0
   -2.0925   -2.9468    1.1103 H   0  0  0  0  0  0
   -2.1497   -0.1926   -0.5038 C   0  0  0  0  0  0
    0.0579   -2.2995    3.4181 C   0  0  0  0  0  0
   -0.9445   -1.9872    3.1177 H   0  0  0  0  0  0
    0.3413   -1.7491    4.3193 H   0  0  0  0  0  0
    1.9683   -1.4929   -0.4751 N   0  0  0  0  0  0
    2.7617   -1.3738   -1.1095 H   0  0  0  0  0  0
   -1.6622   -1.5504   -0.3944 N   0  0  0  0  0  0
   -3.8905   -3.0533   -1.7214 O   0  0  0  0  0  0
   -4.3009   -3.7517   -2.2716 H   0  0  0  0  0  0
   -0.2027   -3.2464   -0.7066 O   0  0  0  0  0  0
   -3.2371   -4.6275   -0.3041 O   0  0  0  0  0  0
    0.5428    0.1838    2.1388 O   0  0  0  0  0  0
    0.9956   -2.0221    2.3711 O   0  0  0  0  0  0
   -1.5828    0.4059    0.2204 H   0  0  0  0  0  0
  1  2  1  0  0  0
  1  3  2  0  0  0
  1  5  1  0  0  0
  3  4  1  0  0  0
  3  7  1  0  0  0
  5  6  1  0  0  0
  5  9  2  0  0  0
  7  8  1  0  0  0
  7 11  2  0  0  0
  9 10  1  0  0  0
  9 11  1  0  0  0
 11 23  1  0  0  0
 12 46  1  0  0  0
 12 58  1  0  0  0
 12 61  2  0  0  0
 13 50  1  0  0  0
 13 59  1  0  0  0
 13 62  2  0  0  0
 14 48  1  0  0  0
 14 63  2  0  0  0
 14 64  1  0  0  0
 15 16  1  0  0  0
 15 17  1  0  0  0
 15 18  1  0  0  0
 15 46  1  0  0  0
 19 20  1  0  0  0
 19 21  1  0  0  0
 19 22  1  0  0  0
 19 53  1  0  0  0
 23 24  1  0  0  0
 23 25  1  0  0  0
 23 38  1  0  0  0
 26 27  1  0  0  0
 26 28  1  0  0  0
 26 29  1  0  0  0
 26 32  1  0  0  0
 29 30  1  0  0  0
 29 31  1  0  0  0
 29 41  1  0  0  0
 32 33  1  0  0  0
 32 34  1  0  0  0
 32 44  1  0  0  0
 35 36  1  0  0  0
 35 37  1  0  0  0
 35 44  1  0  0  0
 35 50  1  0  0  0
 38 39  1  0  0  0
 38 40  1  0  0  0
 38 48  1  0  0  0
 41 42  1  0  0  0
 41 43  1  0  0  0
 41 52  1  0  0  0
 44 45  1  0  0  0
 44 52  1  0  0  0
 46 47  1  0  0  0
 46 56  1  0  0  0
 48 49  1  0  0  0
 48 56  1  0  0  0
 50 51  1  0  0  0
 50 58  1  0  0  0
 52 58  1  0  0  0
 53 54  1  0  0  0
 53 55  1  0  0  0
 53 64  1  0  0  0
 56 57  1  0  0  0
 59 60  1  0  0  0
 65 52  1  0  0  0
M  END
$$$$
Molecule-061_Metformin
  Cerius2 10300711153D 1   1.00000                          
Structure written by Cerius2 SD Exporter
 20 19  0  0  0  0  0  0  0  0999 V2000
    2.3456    0.0639    0.2161 C   0  0  0  0  0  0
   -0.0598    0.5361    0.0389 C   0  0  0  0  0  0
   -2.4901    0.8302   -0.1434 C   0  0  0  0  0  0
   -3.4274    0.2761   -0.2253 H   0  0  0  0  0  0
   -2.5622    1.4495    0.7537 H   0  0  0  0  0  0
   -2.4255    1.4805   -1.0189 H   0  0  0  0  0  0
   -1.4861   -1.4565   -0.1059 C   0  0  0  0  0  0
   -2.5273   -1.7738   -0.1918 H   0  0  0  0  0  0
   -0.9533   -1.8729   -0.9640 H   0  0  0  0  0  0
   -1.0901   -1.9039    0.8088 H   0  0  0  0  0  0
    2.8389    1.3074    0.2758 N   0  0  0  0  0  0
    2.2232    2.0503    0.2413 H   0  0  0  0  0  0
    0.0896    1.8759    0.0738 N   0  0  0  0  0  0
   -0.6839    2.4543    0.0242 H   0  0  0  0  0  0
    3.2276   -0.9384    0.2666 N   0  0  0  0  0  0
    4.1729   -0.7396    0.3429 H   0  0  0  0  0  0
    2.9259   -1.8577    0.2273 H   0  0  0  0  0  0
    1.0391   -0.2615    0.1097 N   0  0  0  0  0  0
    0.8645   -1.2098    0.0797 H   0  0  0  0  0  0
   -1.3147   -0.0168   -0.0675 N   0  0  0  0  0  0
  1 11  2  0  0  0
  1 15  1  0  0  0
  1 18  1  0  0  0
  2 13  2  0  0  0
  2 18  1  0  0  0
  2 20  1  0  0  0
  3  4  1  0  0  0
  3  5  1  0  0  0
  3  6  1  0  0  0
  3 20  1  0  0  0
  7  8  1  0  0  0
  7  9  1  0  0  0
  7 10  1  0  0  0
  7 20  1  0  0  0
 11 12  1  0  0  0
 13 14  1  0  0  0
 15 16  1  0  0  0
 15 17  1  0  0  0
 18 19  1  0  0  0
M  END
$$$$
Molecule-062-Eflornithine
  Cerius2 10300711153D 1   1.00000                          

 24 23  0  0  0  0  0  0  0  0999 V2000
   -0.7112    0.2037   -0.9733 N   0  0  0  0  0  0
    0.5004   -0.2533   -0.2829 C   0  0  0  0  0  0
    1.4967    0.9186   -0.1032 C   0  0  0  0  0  0
    2.7204    0.6383    0.8231 C   0  0  0  0  0  0
    3.8509   -0.3206    0.2995 C   0  0  0  0  0  0
    4.3337    0.2031   -1.0015 N   0  0  0  0  0  0
    5.0642   -0.3382    1.2920 C   0  0  0  0  0  0
    5.6267    0.9072    1.4558 F   0  0  0  0  0  0
    6.0725   -1.1709    0.8588 F   0  0  0  0  0  0
    3.3572   -1.7230    0.1635 C   0  0  0  0  0  0
    3.4002   -2.4107   -1.0014 O   0  0  0  0  0  0
    2.8793   -2.3271    1.1506 O   0  0  0  0  0  0
   -1.3413   -0.5990   -1.0419 H   0  0  0  0  0  0
   -1.1686    0.8868   -0.3650 H   0  0  0  0  0  0
    0.2166   -0.6649    0.6884 H   0  0  0  0  0  0
    0.9439   -1.0440   -0.8879 H   0  0  0  0  0  0
    1.8411    1.2496   -1.0857 H   0  0  0  0  0  0
    0.9436    1.7538    0.3376 H   0  0  0  0  0  0
    3.1750    1.6142    1.0187 H   0  0  0  0  0  0
    2.3485    0.2759    1.7863 H   0  0  0  0  0  0
    5.1069   -0.3915   -1.3110 H   0  0  0  0  0  0
    3.5791    0.1022   -1.6837 H   0  0  0  0  0  0
    4.7463   -0.6844    2.2788 H   0  0  0  0  0  0
    3.7666   -2.0058   -1.8131 H   0  0  0  0  0  0
  1  2  1  0  0  0
  1 13  1  0  0  0
  1 14  1  0  0  0
  2  3  1  0  0  0
  2 15  1  0  0  0
  2 16  1  0  0  0
  3  4  1  0  0  0
  3 17  1  0  0  0
  3 18  1  0  0  0
  4  5  1  0  0  0
  4 19  1  0  0  0
  4 20  1  0  0  0
  5  6  1  0  0  0
  5  7  1  0  0  0
  5 10  1  0  0  0
  6 21  1  0  0  0
  6 22  1  0  0  0
  7  8  1  0  0  0
  7  9  1  0  0  0
  7 23  1  0  0  0
 10 11  1  0  0  0
 10 12  2  0  0  0
 11 24  1  0  0  0
M  END
$$$$
Molecule-063-Valsartan
  Cerius2 10300711153D 1   1.00000                          
Structure written by Cerius2 SD Exporter
 61 63  0  0  0  0  0  0  0  0999 V2000
    6.2096    2.6950   -0.7021 C   0  0  0  0  0  0
    6.4027    3.6143   -1.1069 H   0  0  0  0  0  0
    7.2668    1.8788   -0.2779 C   0  0  0  0  0  0
    8.2318    2.2045   -0.3720 H   0  0  0  0  0  0
    2.4238    0.3904   -0.9734 C   0  0  0  0  0  0
    2.8186    0.4267   -1.9175 H   0  0  0  0  0  0
    2.6583    0.5882    1.4396 C   0  0  0  0  0  0
    3.2241    0.7739    2.2728 H   0  0  0  0  0  0
    1.0603    0.0813   -0.8143 C   0  0  0  0  0  0
    0.4984   -0.0944   -1.6489 H   0  0  0  0  0  0
    1.2957    0.2766    1.5951 C   0  0  0  0  0  0
    0.9076    0.2408    2.5410 H   0  0  0  0  0  0
    4.8857    2.2502   -0.5632 C   0  0  0  0  0  0
    4.1300    2.8716   -0.8687 H   0  0  0  0  0  0
    7.0001    0.6134    0.2709 C   0  0  0  0  0  0
    7.8001    0.0434    0.5596 H   0  0  0  0  0  0
    3.2365    0.6498    0.1526 C   0  0  0  0  0  0
    0.4716    0.0292    0.4706 C   0  0  0  0  0  0
    4.5988    0.9817   -0.0008 C   0  0  0  0  0  0
    5.6726    0.1309    0.4101 C   0  0  0  0  0  0
    5.4899   -1.1717    0.9320 C   0  0  0  0  0  0
   -2.4660    0.2433   -1.2914 C   0  0  0  0  0  0
   -0.9496    2.6871    1.0047 C   0  0  0  0  0  0
   -4.5279   -4.4176   -1.0546 C   0  0  0  0  0  0
   -4.4748   -5.4197   -1.4846 H   0  0  0  0  0  0
   -4.3234   -4.4876    0.0157 H   0  0  0  0  0  0
   -5.5388   -4.0310   -1.1989 H   0  0  0  0  0  0
   -4.7521    1.8638    0.5951 C   0  0  0  0  0  0
   -5.6071    2.0653    1.2445 H   0  0  0  0  0  0
   -4.8087    2.5533   -0.2495 H   0  0  0  0  0  0
   -4.8415    0.8426    0.2210 H   0  0  0  0  0  0
   -3.4111    1.1151    2.6132 C   0  0  0  0  0  0
   -4.2464    1.3555    3.2747 H   0  0  0  0  0  0
   -3.5120    0.0720    2.3082 H   0  0  0  0  0  0
   -2.4933    1.2284    3.1899 H   0  0  0  0  0  0
   -2.4760   -1.1271   -1.8813 C   0  0  0  0  0  0
   -1.4778   -1.5635   -1.8502 H   0  0  0  0  0  0
   -2.7438   -1.0723   -2.9418 H   0  0  0  0  0  0
   -3.4947   -3.4983   -1.7436 C   0  0  0  0  0  0
   -2.4994   -3.9304   -1.6070 H   0  0  0  0  0  0
   -3.7110   -3.4739   -2.8153 H   0  0  0  0  0  0
   -3.5096   -2.0524   -1.1801 C   0  0  0  0  0  0
   -4.5098   -1.6295   -1.3170 H   0  0  0  0  0  0
   -3.3090   -2.0911   -0.1066 H   0  0  0  0  0  0
   -3.4182    2.0573    1.3751 C   0  0  0  0  0  0
   -3.4663    3.0788    1.7706 H   0  0  0  0  0  0
   -2.1417    1.9825    0.4439 C   0  0  0  0  0  0
   -2.3784    2.6636   -0.3799 H   0  0  0  0  0  0
   -0.9803   -0.2723    0.6354 C   0  0  0  0  0  0
   -1.1022   -1.3184    0.3622 H   0  0  0  0  0  0
   -1.2428   -0.2493    1.6916 H   0  0  0  0  0  0
    4.4126   -1.9615    0.8394 N   0  0  0  0  0  0
    3.5854   -1.7343    0.3893 H   0  0  0  0  0  0
    6.3876   -1.8936    1.6217 N   0  0  0  0  0  0
    4.6424   -3.0784    1.4387 N   0  0  0  0  0  0
    5.8450   -3.0315    1.9124 N   0  0  0  0  0  0
   -1.8692    0.6322   -0.1043 N   0  0  0  0  0  0
   -0.8059    2.9780    2.3158 O   0  0  0  0  0  0
    0.0032    3.4457    2.6087 H   0  0  0  0  0  0
   -3.1027    1.0779   -1.9801 O   0  0  0  0  0  0
   -0.0181    3.0649    0.2579 O   0  0  0  0  0  0
  1  2  1  0  0  0
  1  3  1  0  0  0
  1 13  2  0  0  0
  3  4  1  0  0  0
  3 15  2  0  0  0
  5  6  1  0  0  0
  5  9  1  0  0  0
  5 17  2  0  0  0
  7  8  1  0  0  0
  7 11  2  0  0  0
  7 17  1  0  0  0
  9 10  1  0  0  0
  9 18  2  0  0  0
 11 12  1  0  0  0
 11 18  1  0  0  0
 13 14  1  0  0  0
 13 19  1  0  0  0
 15 16  1  0  0  0
 15 20  1  0  0  0
 17 19  1  0  0  0
 18 49  1  0  0  0
 19 20  2  0  0  0
 20 21  1  0  0  0
 21 52  1  0  0  0
 21 54  2  0  0  0
 22 36  1  0  0  0
 22 57  1  0  0  0
 22 60  2  0  0  0
 23 47  1  0  0  0
 23 58  1  0  0  0
 23 61  2  0  0  0
 24 25  1  0  0  0
 24 26  1  0  0  0
 24 27  1  0  0  0
 24 39  1  0  0  0
 28 29  1  0  0  0
 28 30  1  0  0  0
 28 31  1  0  0  0
 28 45  1  0  0  0
 32 33  1  0  0  0
 32 34  1  0  0  0
 32 35  1  0  0  0
 32 45  1  0  0  0
 36 37  1  0  0  0
 36 38  1  0  0  0
 36 42  1  0  0  0
 39 40  1  0  0  0
 39 41  1  0  0  0
 39 42  1  0  0  0
 42 43  1  0  0  0
 42 44  1  0  0  0
 45 46  1  0  0  0
 45 47  1  0  0  0
 47 48  1  0  0  0
 47 57  1  0  0  0
 49 50  1  0  0  0
 49 51  1  0  0  0
 49 57  1  0  0  0
 52 53  1  0  0  0
 52 55  1  0  0  0
 54 56  1  0  0  0
 55 56  2  0  0  0
 58 59  1  0  0  0
M  END
$$$$
Molecule-064-Dipyridamole
  Cerius2 10300711153D 1   1.00000                          
Structure written by Cerius2 SD Exporter
 76 79  0  0  0  0  0  0  0  0999 V2000
   -0.2719   -0.6826    0.5504 C   0  0  0  0  0  0
    0.3123    0.6054    0.6194 C   0  0  0  0  0  0
    0.5927   -1.7966    0.4964 C   0  0  0  0  0  0
   -0.5635    1.7193    0.6571 C   0  0  0  0  0  0
   -2.4683    0.2512    0.5458 C   0  0  0  0  0  0
    2.5095   -0.3588    0.5680 C   0  0  0  0  0  0
   -1.8709   -4.9363   -0.2333 C   0  0  0  0  0  0
   -2.4040   -4.1958   -0.8378 H   0  0  0  0  0  0
   -2.4400   -5.8688   -0.2773 H   0  0  0  0  0  0
    1.4187    5.3830    0.1243 C   0  0  0  0  0  0
    2.2665    5.8297   -0.4017 H   0  0  0  0  0  0
    0.9250    6.1720    0.6989 H   0  0  0  0  0  0
   -0.4661   -5.1542   -0.8482 C   0  0  0  0  0  0
    0.0485   -5.9437   -0.2929 H   0  0  0  0  0  0
   -0.5604   -5.4818   -1.8871 H   0  0  0  0  0  0
   -1.7903   -4.4344    1.2388 C   0  0  0  0  0  0
   -2.6334   -3.7673    1.4293 H   0  0  0  0  0  0
   -1.8999   -5.2870    1.9151 H   0  0  0  0  0  0
    0.4221    4.7920   -0.9059 C   0  0  0  0  0  0
   -0.0078    5.6005   -1.5029 H   0  0  0  0  0  0
    0.9579    4.1201   -1.5828 H   0  0  0  0  0  0
    1.9280    4.2832    1.0899 C   0  0  0  0  0  0
    2.5523    3.5886    0.5276 H   0  0  0  0  0  0
    2.5429    4.7352    1.8722 H   0  0  0  0  0  0
    0.3650   -3.8417   -0.7781 C   0  0  0  0  0  0
    1.4264   -4.0895   -0.8717 H   0  0  0  0  0  0
    0.0887   -3.2276   -1.6421 H   0  0  0  0  0  0
   -0.4639   -3.6975    1.5885 C   0  0  0  0  0  0
   -0.6565   -2.9835    2.3971 H   0  0  0  0  0  0
    0.2495   -4.4293    1.9797 H   0  0  0  0  0  0
   -0.7131    4.0038   -0.2018 C   0  0  0  0  0  0
   -1.3486    4.7004    0.3527 H   0  0  0  0  0  0
   -1.3367    3.5472   -0.9780 H   0  0  0  0  0  0
    0.7507    3.5044    1.7332 C   0  0  0  0  0  0
    1.1546    2.6999    2.3547 H   0  0  0  0  0  0
    0.2088    4.1761    2.4057 H   0  0  0  0  0  0
   -4.3909   -1.1319   -0.0809 C   0  0  0  0  0  0
   -5.4752   -1.1741    0.0621 H   0  0  0  0  0  0
   -3.9889   -2.0049    0.4371 H   0  0  0  0  0  0
   -4.7282    1.0988    1.0092 C   0  0  0  0  0  0
   -4.2107    1.8200    1.6495 H   0  0  0  0  0  0
   -5.4797    0.6260    1.6484 H   0  0  0  0  0  0
    4.4727    1.0858    0.2882 C   0  0  0  0  0  0
    5.5545    1.0737    0.4550 H   0  0  0  0  0  0
    4.0767    1.8278    0.9844 H   0  0  0  0  0  0
    4.7557   -1.3285    0.8732 C   0  0  0  0  0  0
    4.2261   -2.1560    1.3543 H   0  0  0  0  0  0
    5.5152   -1.0129    1.5949 H   0  0  0  0  0  0
   -4.1224   -1.2793   -1.5981 C   0  0  0  0  0  0
   -4.4985   -0.4027   -2.1292 H   0  0  0  0  0  0
   -3.0521   -1.3736   -1.7905 H   0  0  0  0  0  0
   -5.4476    1.8901   -0.1070 C   0  0  0  0  0  0
   -4.7114    2.4182   -0.7173 H   0  0  0  0  0  0
   -6.0179    1.2140   -0.7464 H   0  0  0  0  0  0
    4.2453    1.5644   -1.1668 C   0  0  0  0  0  0
    4.6430    0.8272   -1.8668 H   0  0  0  0  0  0
    3.1816    1.6990   -1.3690 H   0  0  0  0  0  0
    5.4622   -1.8875   -0.3831 C   0  0  0  0  0  0
    4.7163   -2.2561   -1.0910 H   0  0  0  0  0  0
    6.0528   -1.1070   -0.8659 H   0  0  0  0  0  0
   -1.6234   -0.8119    0.5164 N   0  0  0  0  0  0
    1.6693    0.7129    0.6242 N   0  0  0  0  0  0
    1.9336   -1.5889    0.5000 N   0  0  0  0  0  0
   -1.9041    1.4860    0.6160 N   0  0  0  0  0  0
    0.1490   -3.0792    0.4343 N   0  0  0  0  0  0
   -0.1692    3.0251    0.7214 N   0  0  0  0  0  0
   -3.8258    0.0834    0.4878 N   0  0  0  0  0  0
    3.8730   -0.2100    0.5687 N   0  0  0  0  0  0
   -4.7814   -2.4413   -2.0961 O   0  0  0  0  0  0
   -4.6043   -2.4543   -3.0617 H   0  0  0  0  0  0
   -6.3483    2.8344    0.4671 O   0  0  0  0  0  0
   -6.7675    3.2936   -0.2927 H   0  0  0  0  0  0
    4.9078    2.8080   -1.3788 O   0  0  0  0  0  0
    4.7430    3.0331   -2.3196 H   0  0  0  0  0  0
    6.3354   -2.9554   -0.0213 O   0  0  0  0  0  0
    6.7428   -3.2581   -0.8616 H   0  0  0  0  0  0
  1  2  2  0  0  0
  1  3  1  0  0  0
  1 61  1  0  0  0
  2  4  1  0  0  0
  2 62  1  0  0  0
  3 63  2  0  0  0
  3 65  1  0  0  0
  4 64  2  0  0  0
  4 66  1  0  0  0
  5 61  2  0  0  0
  5 64  1  0  0  0
  5 67  1  0  0  0
  6 62  2  0  0  0
  6 63  1  0  0  0
  6 68  1  0  0  0
  7  8  1  0  0  0
  7  9  1  0  0  0
  7 13  1  0  0  0
  7 16  1  0  0  0
 10 11  1  0  0  0
 10 12  1  0  0  0
 10 19  1  0  0  0
 10 22  1  0  0  0
 13 14  1  0  0  0
 13 15  1  0  0  0
 13 25  1  0  0  0
 16 17  1  0  0  0
 16 18  1  0  0  0
 16 28  1  0  0  0
 19 20  1  0  0  0
 19 21  1  0  0  0
 19 31  1  0  0  0
 22 23  1  0  0  0
 22 24  1  0  0  0
 22 34  1  0  0  0
 25 26  1  0  0  0
 25 27  1  0  0  0
 25 65  1  0  0  0
 28 29  1  0  0  0
 28 30  1  0  0  0
 28 65  1  0  0  0
 31 32  1  0  0  0
 31 33  1  0  0  0
 31 66  1  0  0  0
 34 35  1  0  0  0
 34 36  1  0  0  0
 34 66  1  0  0  0
 37 38  1  0  0  0
 37 39  1  0  0  0
 37 49  1  0  0  0
 37 67  1  0  0  0
 40 41  1  0  0  0
 40 42  1  0  0  0
 40 52  1  0  0  0
 40 67  1  0  0  0
 43 44  1  0  0  0
 43 45  1  0  0  0
 43 55  1  0  0  0
 43 68  1  0  0  0
 46 47  1  0  0  0
 46 48  1  0  0  0
 46 58  1  0  0  0
 46 68  1  0  0  0
 49 50  1  0  0  0
 49 51  1  0  0  0
 49 69  1  0  0  0
 52 53  1  0  0  0
 52 54  1  0  0  0
 52 71  1  0  0  0
 55 56  1  0  0  0
 55 57  1  0  0  0
 55 73  1  0  0  0
 58 59  1  0  0  0
 58 60  1  0  0  0
 58 75  1  0  0  0
 69 70  1  0  0  0
 71 72  1  0  0  0
 73 74  1  0  0  0
 75 76  1  0  0  0
M  END
$$$$
Molecule-065-Oxytetracycline
  Cerius2 10300711153D 1   1.00000                          

 57 60  0  0  0  0  0  0  0  0999 V2000
    0.6939   -6.6021    2.9148 C   0  0  0  0  0  0
    1.3530   -7.6981    3.4792 C   0  0  0  0  0  0
    2.6710   -8.0015    3.1033 C   0  0  0  0  0  0
    1.3609   -5.7921    1.9865 C   0  0  0  0  0  0
    2.7018   -6.0572    1.5963 C   0  0  0  0  0  0
    3.3594   -7.2014    2.1440 C   0  0  0  0  0  0
    4.6533   -7.5486    1.6767 C   0  0  0  0  0  0
    3.4760   -5.1592    0.6614 C   0  0  0  0  0  0
    4.3583   -6.0314   -0.3201 C   0  0  0  0  0  0
    5.1026   -7.1365    0.3920 C   0  0  0  0  0  0
    6.1924   -7.7627   -0.2779 C   0  0  0  0  0  0
    5.2913   -5.1470   -1.2461 C   0  0  0  0  0  0
    6.6831   -5.7586   -1.6364 C   0  0  0  0  0  0
    6.5983   -7.3120   -1.6468 C   0  0  0  0  0  0
    7.9264   -7.8509   -2.1013 C   0  0  0  0  0  0
    7.8802   -5.2751   -0.7286 C   0  0  0  0  0  0
    9.0888   -6.1587   -0.8053 C   0  0  0  0  0  0
    9.1525   -7.3469   -1.5870 C   0  0  0  0  0  0
   10.3948   -7.9948   -1.8469 C   0  0  0  0  0  0
   10.5386   -9.1615   -2.4973 N   0  0  0  0  0  0
   10.1356   -5.7393   -0.0483 O   0  0  0  0  0  0
    3.1902   -9.1017    3.6996 O   0  0  0  0  0  0
    5.4551   -8.2963    2.4783 O   0  0  0  0  0  0
    6.8430   -8.7000    0.2465 O   0  0  0  0  0  0
    7.9045   -8.7573   -2.9698 O   0  0  0  0  0  0
   11.5039   -7.5347   -1.4933 O   0  0  0  0  0  0
    4.3641   -4.4191    1.5052 O   0  0  0  0  0  0
    2.6167   -4.0956   -0.1029 C   0  0  0  0  0  0
    4.5725   -4.8514   -2.4496 O   0  0  0  0  0  0
    8.3207   -3.8559   -0.9855 N   0  0  0  0  0  0
    7.7471   -2.7508   -0.1655 C   0  0  0  0  0  0
    8.7213   -3.4570   -2.3653 C   0  0  0  0  0  0
   -0.2706   -6.3918    3.1831 H   0  0  0  0  0  0
    0.8652   -8.2826    4.1620 H   0  0  0  0  0  0
    0.8374   -5.0017    1.6131 H   0  0  0  0  0  0
    5.4707   -4.1894   -0.7640 H   0  0  0  0  0  0
    7.5606   -5.3552    0.3152 H   0  0  0  0  0  0
    3.2274   -3.4489   -0.7304 H   0  0  0  0  0  0
    1.8767   -4.5886   -0.7364 H   0  0  0  0  0  0
    2.1045   -3.4309    0.5943 H   0  0  0  0  0  0
    8.4877   -1.9562   -0.0563 H   0  0  0  0  0  0
    6.8612   -2.3266   -0.6405 H   0  0  0  0  0  0
    7.4819   -3.0871    0.8384 H   0  0  0  0  0  0
    9.2593   -4.2617   -2.8691 H   0  0  0  0  0  0
    9.3867   -2.5921   -2.3285 H   0  0  0  0  0  0
    7.8440   -3.1943   -2.9595 H   0  0  0  0  0  0
    3.6575   -6.5603   -0.9761 H   0  0  0  0  0  0
    6.9087   -5.4523   -2.6623 H   0  0  0  0  0  0
    5.5496   -7.7333   -2.5383 O   0  0  0  0  0  0
    9.7648   -9.6342   -2.8329 H   0  0  0  0  0  0
   11.4259   -9.5286   -2.6314 H   0  0  0  0  0  0
   10.9802   -6.2340   -0.0270 H   0  0  0  0  0  0
    4.1068   -9.3757    3.5056 H   0  0  0  0  0  0
    6.3530   -8.5593    2.1925 H   0  0  0  0  0  0
    3.7875   -3.9279    2.1282 H   0  0  0  0  0  0
    5.0926   -4.1619   -2.9177 H   0  0  0  0  0  0
    5.8298   -7.4547   -3.4368 H   0  0  0  0  0  0
  1  2  2  0  0  0
  1 33  1  0  0  0
  2  3  1  0  0  0
  2 34  1  0  0  0
  3  6  2  0  0  0
  3 22  1  0  0  0
  4  1  1  0  0  0
  4 35  1  0  0  0
  5  4  2  0  0  0
  5  6  1  0  0  0
  5  8  1  0  0  0
  6  7  1  0  0  0
  7 10  2  0  0  0
  7 23  1  0  0  0
  8 27  1  1  0  0
  8 28  1  6  0  0
  9  8  1  0  0  0
  9 10  1  0  0  0
  9 12  1  0  0  0
 10 11  1  0  0  0
 11 14  1  0  0  0
 11 24  2  0  0  0
 12 29  1  6  0  0
 12 36  1  0  0  0
 13 12  1  0  0  0
 13 14  1  0  0  0
 13 16  1  0  0  0
 14 15  1  0  0  0
 15 18  1  0  0  0
 15 25  2  0  0  0
 16 30  1  6  0  0
 16 37  1  0  0  0
 17 16  1  0  0  0
 17 18  2  0  0  0
 17 21  1  0  0  0
 18 19  1  0  0  0
 19 20  1  0  0  0
 19 26  2  0  0  0
 20 50  1  0  0  0
 20 51  1  0  0  0
 21 52  1  0  0  0
 22 53  1  0  0  0
 23 54  1  0  0  0
 27 55  1  0  0  0
 28 38  1  0  0  0
 28 39  1  0  0  0
 28 40  1  0  0  0
 29 56  1  0  0  0
 30 31  1  0  0  0
 30 32  1  0  0  0
 31 41  1  0  0  0
 31 42  1  0  0  0
 31 43  1  0  0  0
 32 44  1  0  0  0
 32 45  1  0  0  0
 32 46  1  0  0  0
 47  9  1  0  0  0
 48 13  1  0  0  0
 49 14  1  0  0  0
 49 57  1  0  0  0
M  END
$$$$
Molecule-066-Cilazapril
  Cerius2 10300711153D 1   1.00000                          

 61 63  0  0  0  0  0  0  0  0999 V2000
   -3.9161   -2.4005   -0.3806 C   0  0  0  0  0  0
   -4.9758   -2.3289    0.7694 C   0  0  0  0  0  0
   -5.4555   -3.7348    1.2116 C   0  0  0  0  0  0
   -4.2488   -4.6565    1.4965 C   0  0  0  0  0  0
   -3.3266   -4.5781    0.3314 N   0  0  0  0  0  0
   -2.8401   -3.3261    0.0019 N   0  0  0  0  0  0
   -1.4900   -3.0423    0.0056 C   0  0  0  0  0  0
   -2.6327   -5.7980   -0.1525 C   0  0  0  0  0  0
   -0.3724   -3.8765    0.5671 C   0  0  0  0  0  0
   -1.4948   -6.2362    0.7986 C   0  0  0  0  0  0
   -0.7585   -5.0624    1.4961 C   0  0  0  0  0  0
   -3.5889   -1.0065   -0.8014 C   0  0  0  0  0  0
   -1.0841   -2.0060   -0.5702 O   0  0  0  0  0  0
   -3.1706   -0.1564    0.0176 O   0  0  0  0  0  0
   -3.7541   -0.5982   -2.0811 O   0  0  0  0  0  0
    0.5332   -3.0123    1.3887 N   0  0  0  0  0  0
    1.9407   -2.7717    0.9574 C   0  0  0  0  0  0
    2.0334   -2.0700   -0.3492 C   0  0  0  0  0  0
    2.8135   -4.0619    1.0473 C   0  0  0  0  0  0
    4.3425   -3.8103    0.8897 C   0  0  0  0  0  0
    5.2656   -4.9813    0.9982 C   0  0  0  0  0  0
    4.8401   -6.3162    1.2212 C   0  0  0  0  0  0
    5.7706   -7.3689    1.3094 C   0  0  0  0  0  0
    7.1450   -7.1085    1.1767 C   0  0  0  0  0  0
    7.5880   -5.7937    0.9554 C   0  0  0  0  0  0
    6.6564   -4.7428    0.8670 C   0  0  0  0  0  0
    1.8509   -2.6958   -1.4206 O   0  0  0  0  0  0
    2.3350   -0.7423   -0.3683 O   0  0  0  0  0  0
    2.4296    0.1123   -1.5166 C   0  0  0  0  0  0
    1.0507    0.3805   -2.1544 C   0  0  0  0  0  0
   -4.5391   -1.8256    1.6380 H   0  0  0  0  0  0
   -5.8472   -1.7498    0.4480 H   0  0  0  0  0  0
   -6.0772   -3.6514    2.1069 H   0  0  0  0  0  0
   -6.0635   -4.1755    0.4162 H   0  0  0  0  0  0
   -3.7374   -4.3271    2.4037 H   0  0  0  0  0  0
   -4.6090   -5.6763    1.6559 H   0  0  0  0  0  0
   -3.3505   -6.6138   -0.2682 H   0  0  0  0  0  0
   -2.2214   -5.5991   -1.1462 H   0  0  0  0  0  0
   -1.9112   -6.8846    1.5747 H   0  0  0  0  0  0
   -0.7737   -6.8307    0.2302 H   0  0  0  0  0  0
    0.1488   -5.4783    1.9444 H   0  0  0  0  0  0
   -1.3659   -4.6833    2.3208 H   0  0  0  0  0  0
    2.3305   -2.0830    1.7122 H   0  0  0  0  0  0
    2.4896   -4.7723    0.2827 H   0  0  0  0  0  0
    2.6397   -4.5163    2.0268 H   0  0  0  0  0  0
    4.6399   -3.0835    1.6511 H   0  0  0  0  0  0
    4.5110   -3.3533   -0.0893 H   0  0  0  0  0  0
    3.8506   -6.5450    1.3219 H   0  0  0  0  0  0
    5.4469   -8.3256    1.4699 H   0  0  0  0  0  0
    7.8206   -7.8735    1.2406 H   0  0  0  0  0  0
    8.5877   -5.6013    0.8584 H   0  0  0  0  0  0
    7.0039   -3.7937    0.7044 H   0  0  0  0  0  0
    2.8523    1.0639   -1.1876 H   0  0  0  0  0  0
    3.1079   -0.3236   -2.2547 H   0  0  0  0  0  0
    1.1521    1.0986   -2.9699 H   0  0  0  0  0  0
    0.6281   -0.5426   -2.5534 H   0  0  0  0  0  0
    0.3670    0.7884   -1.4077 H   0  0  0  0  0  0
   -4.0775   -1.2181   -2.7655 H   0  0  0  0  0  0
    0.0859   -2.0960    1.4861 H   0  0  0  0  0  0
   -4.4093   -2.8595   -1.2437 H   0  0  0  0  0  0
    0.1616   -4.2978   -0.2881 H   0  0  0  0  0  0
  1  2  1  0  0  0
  1  6  1  0  0  0
  1 12  1  0  0  0
  2  3  1  0  0  0
  2 31  1  0  0  0
  2 32  1  0  0  0
  3  4  1  0  0  0
  3 33  1  0  0  0
  3 34  1  0  0  0
  4  5  1  0  0  0
  4 35  1  0  0  0
  4 36  1  0  0  0
  5  6  1  0  0  0
  5  8  1  0  0  0
  6  7  1  0  0  0
  7  9  1  0  0  0
  7 13  2  0  0  0
  8 10  1  0  0  0
  8 37  1  0  0  0
  8 38  1  0  0  0
  9 11  1  0  0  0
  9 16  1  0  0  0
 10 11  1  0  0  0
 10 39  1  0  0  0
 10 40  1  0  0  0
 11 41  1  0  0  0
 11 42  1  0  0  0
 12 14  2  0  0  0
 12 15  1  0  0  0
 15 58  1  0  0  0
 16 17  1  0  0  0
 16 59  1  0  0  0
 17 18  1  0  0  0
 17 19  1  0  0  0
 17 43  1  0  0  0
 18 27  2  0  0  0
 18 28  1  0  0  0
 19 20  1  0  0  0
 19 44  1  0  0  0
 19 45  1  0  0  0
 20 21  1  0  0  0
 20 46  1  0  0  0
 20 47  1  0  0  0
 21 22  2  0  0  0
 22 23  1  0  0  0
 22 48  1  0  0  0
 23 24  2  0  0  0
 23 49  1  0  0  0
 24 25  1  0  0  0
 24 50  1  0  0  0
 25 26  2  0  0  0
 25 51  1  0  0  0
 26 21  1  0  0  0
 26 52  1  0  0  0
 28 29  1  0  0  0
 29 30  1  0  0  0
 29 53  1  0  0  0
 29 54  1  0  0  0
 30 55  1  0  0  0
 30 56  1  0  0  0
 30 57  1  0  0  0
 60  1  1  0  0  0
 61  9  1  0  0  0
M  END
$$$$
Molecule-067-Fenoterol
  Cerius2 10300711153D 1   1.00000                          

 43 44  0  0  0  0  0  0  0  0999 V2000
   -1.6383   -0.4053   -1.1431 C   0  0  0  0  0  0
   -2.1579    0.5212   -0.0094 C   0  0  0  0  0  0
   -1.1169    1.6180    0.3730 C   0  0  0  0  0  0
    0.1468    1.0853    0.9570 C   0  0  0  0  0  0
    1.3762    1.1904    0.2626 C   0  0  0  0  0  0
    2.5625    0.6769    0.8197 C   0  0  0  0  0  0
    2.5374    0.0528    2.0792 C   0  0  0  0  0  0
    3.6792   -0.4430    2.6067 O   0  0  0  0  0  0
    1.3250   -0.0525    2.7841 C   0  0  0  0  0  0
    0.1394    0.4624    2.2282 C   0  0  0  0  0  0
   -3.4053    1.2167   -0.4261 N   0  0  0  0  0  0
   -4.6578    0.4186   -0.4009 C   0  0  0  0  0  0
   -5.8768    1.3009   -0.7805 C   0  0  0  0  0  0
   -5.7527    1.7564   -2.1288 O   0  0  0  0  0  0
   -7.1757    0.5818   -0.6185 C   0  0  0  0  0  0
   -7.5106   -0.5076   -1.4601 C   0  0  0  0  0  0
   -8.7339   -1.1879   -1.3124 C   0  0  0  0  0  0
   -9.0286   -2.2244   -2.1303 O   0  0  0  0  0  0
   -9.6433   -0.7862   -0.3180 C   0  0  0  0  0  0
   -9.3302    0.2931    0.5262 C   0  0  0  0  0  0
  -10.2116    0.6719    1.4796 O   0  0  0  0  0  0
   -8.1057    0.9718    0.3761 C   0  0  0  0  0  0
   -2.3581   -1.1962   -1.3545 H   0  0  0  0  0  0
   -0.7013   -0.8829   -0.8524 H   0  0  0  0  0  0
   -1.4715    0.1678   -2.0574 H   0  0  0  0  0  0
   -2.3609   -0.0883    0.8773 H   0  0  0  0  0  0
   -0.9079    2.2209   -0.5160 H   0  0  0  0  0  0
   -1.5607    2.2956    1.1081 H   0  0  0  0  0  0
    1.4177    1.6378   -0.6564 H   0  0  0  0  0  0
    3.4442    0.7562    0.3081 H   0  0  0  0  0  0
    3.6685   -0.8825    3.4822 H   0  0  0  0  0  0
    1.3039   -0.5027    3.7016 H   0  0  0  0  0  0
   -0.7308    0.3806    2.7599 H   0  0  0  0  0  0
   -3.5464    1.9919    0.2261 H   0  0  0  0  0  0
   -4.5834   -0.4116   -1.1057 H   0  0  0  0  0  0
   -4.8094    0.0126    0.6036 H   0  0  0  0  0  0
   -5.8516    2.1888   -0.1409 H   0  0  0  0  0  0
   -6.5243    2.3431   -2.2789 H   0  0  0  0  0  0
   -6.8642   -0.8111   -2.1925 H   0  0  0  0  0  0
   -9.8783   -2.7066   -2.0425 H   0  0  0  0  0  0
  -10.5327   -1.2773   -0.2078 H   0  0  0  0  0  0
  -10.0105    1.4227    2.0773 H   0  0  0  0  0  0
   -7.8972    1.7534    1.0016 H   0  0  0  0  0  0
  1  2  1  0  0  0
  1 23  1  0  0  0
  1 24  1  0  0  0
  1 25  1  0  0  0
  2  3  1  0  0  0
  2 11  1  0  0  0
  2 26  1  0  0  0
  3  4  1  0  0  0
  3 27  1  0  0  0
  3 28  1  0  0  0
  4  5  2  0  0  0
  5  6  1  0  0  0
  5 29  1  0  0  0
  6  7  2  0  0  0
  6 30  1  0  0  0
  7  8  1  0  0  0
  7  9  1  0  0  0
  8 31  1  0  0  0
  9 10  2  0  0  0
  9 32  1  0  0  0
 10  4  1  0  0  0
 10 33  1  0  0  0
 11 12  1  0  0  0
 11 34  1  0  0  0
 12 13  1  0  0  0
 12 35  1  0  0  0
 12 36  1  0  0  0
 13 14  1  0  0  0
 13 15  1  0  0  0
 13 37  1  0  0  0
 14 38  1  0  0  0
 15 16  2  0  0  0
 16 17  1  0  0  0
 16 39  1  0  0  0
 17 18  1  0  0  0
 17 19  2  0  0  0
 18 40  1  0  0  0
 19 20  1  0  0  0
 19 41  1  0  0  0
 20 21  1  0  0  0
 20 22  2  0  0  0
 21 42  1  0  0  0
 22 15  1  0  0  0
 22 43  1  0  0  0
M  END
$$$$
Molecule-068-Ivermectin
  Cerius2 10300711153D 1   1.00000                          
Structure written by Cerius2 SD Exporter
137144  0  0  0  0  0  0  0  0999 V2000
   -2.7723   -3.2989    0.6302 C   0  0  0  0  0  0
   -2.5223   -3.9635    1.3653 H   0  0  0  0  0  0
   -1.7834   -2.9027   -0.2883 C   0  0  0  0  0  0
   -2.0423   -2.2825   -1.0613 H   0  0  0  0  0  0
   -4.0725   -2.7669    0.5855 C   0  0  0  0  0  0
   -4.2437   -2.0818   -0.1403 H   0  0  0  0  0  0
   -0.3524   -0.1622    1.3253 C   0  0  0  0  0  0
   -0.4519    0.2589    2.2212 H   0  0  0  0  0  0
   -7.9572   -2.4989   -0.3485 C   0  0  0  0  0  0
   -8.2803   -2.1107   -1.2073 H   0  0  0  0  0  0
   -5.1183   -3.0775    1.4815 C   0  0  0  0  0  0
    0.3282   -1.3356    1.2636 C   0  0  0  0  0  0
   -8.2972   -3.7730   -0.0607 C   0  0  0  0  0  0
   -6.2999   -0.6556   -0.2238 C   0  0  0  0  0  0
   -9.0460   -4.5738   -1.0340 C   0  0  0  0  0  0
   -8.5033   -5.4962   -1.2515 H   0  0  0  0  0  0
  -10.0255   -4.8339   -0.6279 H   0  0  0  0  0  0
   -9.2100   -4.0609   -1.9851 H   0  0  0  0  0  0
    0.8370   -1.9140    2.5185 C   0  0  0  0  0  0
    0.6150   -1.3177    3.4071 H   0  0  0  0  0  0
    0.4051   -2.9019    2.6814 H   0  0  0  0  0  0
    1.9230   -2.0132    2.4667 H   0  0  0  0  0  0
   -1.3661    5.3630    4.4505 C   0  0  0  0  0  0
   -0.7859    4.5111    4.0899 H   0  0  0  0  0  0
   -0.6833    6.1394    4.7969 H   0  0  0  0  0  0
   -1.9672    5.0362    5.3016 H   0  0  0  0  0  0
   -0.8137    5.9732   -1.0693 C   0  0  0  0  0  0
    0.0077    6.6048   -0.7375 H   0  0  0  0  0  0
   -0.6771    4.9745   -0.6533 H   0  0  0  0  0  0
   -0.7586    5.9096   -2.1570 H   0  0  0  0  0  0
   -0.5917    7.4424    2.1811 C   0  0  0  0  0  0
    0.2464    7.1524    2.8162 H   0  0  0  0  0  0
   -0.1777    7.7806    1.2331 H   0  0  0  0  0  0
   -1.1038    8.2900    2.6421 H   0  0  0  0  0  0
    0.0145   -4.1596   -1.4469 C   0  0  0  0  0  0
   -0.6281   -5.0401   -1.5223 H   0  0  0  0  0  0
   -0.0954   -3.5717   -2.3610 H   0  0  0  0  0  0
    1.0492   -4.5026   -1.3789 H   0  0  0  0  0  0
    4.5978   -3.2288   -2.9679 C   0  0  0  0  0  0
    5.5075   -3.1273   -3.5620 H   0  0  0  0  0  0
    4.8319   -3.7554   -2.0407 H   0  0  0  0  0  0
    3.8870   -3.8302   -3.5386 H   0  0  0  0  0  0
    8.6985   -2.5468    0.4602 C   0  0  0  0  0  0
    7.8990   -2.4962    1.2023 H   0  0  0  0  0  0
    8.4161   -3.2888   -0.2820 H   0  0  0  0  0  0
    9.6100   -2.8798    0.9610 H   0  0  0  0  0  0
   -2.2934    5.8977    3.3323 C   0  0  0  0  0  0
   -3.0426    5.1233    3.1576 H   0  0  0  0  0  0
   -2.8239    6.7780    3.7063 H   0  0  0  0  0  0
   -0.9333    0.6117    0.2289 C   0  0  0  0  0  0
   -0.1259    1.1741   -0.2418 H   0  0  0  0  0  0
   -1.3696   -0.0410   -0.5258 H   0  0  0  0  0  0
   -3.3512    0.9275    1.1325 C   0  0  0  0  0  0
   -3.1739   -0.1154    1.4029 H   0  0  0  0  0  0
   -3.7229    1.4302    2.0302 H   0  0  0  0  0  0
    2.7425    0.0689   -0.8050 C   0  0  0  0  0  0
    2.8644   -0.3951    0.1739 H   0  0  0  0  0  0
    2.1962    1.0046   -0.6782 H   0  0  0  0  0  0
    8.4362   -0.8039   -3.0845 C   0  0  0  0  0  0
    8.4020    0.2820   -3.2181 H   0  0  0  0  0  0
    8.2038   -1.2615   -4.0493 H   0  0  0  0  0  0
   -3.3952    4.3347   -1.6145 C   0  0  0  0  0  0
   -4.2523    4.2011   -2.2781 H   0  0  0  0  0  0
   -2.5026    4.1934   -2.2248 H   0  0  0  0  0  0
   -4.7493    2.4909   -0.3026 C   0  0  0  0  0  0
   -5.3161    2.4993   -1.2356 H   0  0  0  0  0  0
   -5.4013    2.9034    0.4718 H   0  0  0  0  0  0
   -2.1810    6.5862   -0.6546 C   0  0  0  0  0  0
   -2.2628    7.5976   -1.0674 H   0  0  0  0  0  0
   -3.4487    5.7492   -1.0054 C   0  0  0  0  0  0
   -4.2417    6.3686   -1.4410 H   0  0  0  0  0  0
   -1.5719    6.2458    1.9856 C   0  0  0  0  0  0
   -0.9882    5.3708    1.6881 H   0  0  0  0  0  0
   -7.1776   -1.6081    0.5161 C   0  0  0  0  0  0
   -7.9306   -0.9752    0.9950 H   0  0  0  0  0  0
   -2.6065    6.5697    0.8491 C   0  0  0  0  0  0
   -3.1206    7.5077    1.0939 H   0  0  0  0  0  0
   -0.3600   -3.3199   -0.1933 C   0  0  0  0  0  0
   -0.2412   -3.9987    0.6575 H   0  0  0  0  0  0
   -6.3995   -2.3465    1.6744 C   0  0  0  0  0  0
   -7.9201   -4.4168    1.2033 C   0  0  0  0  0  0
   -7.2254   -5.2223    0.9499 H   0  0  0  0  0  0
   10.1546   -0.9942   -1.1144 C   0  0  0  0  0  0
   10.9399   -1.6865   -0.8033 H   0  0  0  0  0  0
    0.6157   -2.1068    0.0254 C   0  0  0  0  0  0
    1.6004   -2.5708    0.1593 H   0  0  0  0  0  0
   -2.0358    1.6264    0.6548 C   0  0  0  0  0  0
   -1.6410    2.2423    1.4712 H   0  0  0  0  0  0
   -4.4376    1.0085    0.0309 C   0  0  0  0  0  0
   -4.0278    0.5404   -0.8726 H   0  0  0  0  0  0
   -3.6743    5.5057    0.4877 C   0  0  0  0  0  0
   -4.6865    5.7468    0.8286 H   0  0  0  0  0  0
   -7.2425   -3.4965    2.2742 C   0  0  0  0  0  0
   -8.0176   -3.0721    2.9201 H   0  0  0  0  0  0
    3.9872   -1.8402   -2.6655 C   0  0  0  0  0  0
    3.8263   -1.3417   -3.6286 H   0  0  0  0  0  0
    4.1438    0.3733   -1.4066 C   0  0  0  0  0  0
    3.9727    0.9017   -2.3501 H   0  0  0  0  0  0
    4.9034   -0.9417   -1.7705 C   0  0  0  0  0  0
    5.1136   -1.4819   -0.8414 H   0  0  0  0  0  0
    8.9088   -1.1451   -0.1719 C   0  0  0  0  0  0
    9.0861   -0.4918    0.6890 H   0  0  0  0  0  0
    9.8726   -1.2088   -2.6418 C   0  0  0  0  0  0
   10.5283   -0.5054   -3.1656 H   0  0  0  0  0  0
   -3.4355    3.3537   -0.4083 C   0  0  0  0  0  0
   -5.0459   -4.1765    2.4604 C   0  0  0  0  0  0
   -4.8229   -5.1234    1.9629 H   0  0  0  0  0  0
   -4.2876   -3.9738    3.2196 H   0  0  0  0  0  0
    1.9405   -0.8952   -1.7223 C   0  0  0  0  0  0
    1.7055   -0.3718   -2.6551 H   0  0  0  0  0  0
    7.3452   -1.1789   -2.0568 C   0  0  0  0  0  0
    7.2317   -2.2629   -2.0179 H   0  0  0  0  0  0
    5.2097    1.0346    0.7499 C   0  0  0  0  0  0
    4.3109    1.1068    1.3636 H   0  0  0  0  0  0
    5.6641    0.0532    0.8817 H   0  0  0  0  0  0
    5.9165    1.7845    1.1048 H   0  0  0  0  0  0
    9.8567   -3.7139   -2.7569 C   0  0  0  0  0  0
    8.7735   -3.7873   -2.8367 H   0  0  0  0  0  0
   10.2875   -4.4890   -3.3907 H   0  0  0  0  0  0
   10.1804   -3.9070   -1.7350 H   0  0  0  0  0  0
   -9.0605   -5.0395    1.8017 O   0  0  0  0  0  0
   -9.6965   -4.3139    1.9766 H   0  0  0  0  0  0
   10.7056    0.3165   -0.9200 O   0  0  0  0  0  0
    9.9872    0.9408   -1.1627 H   0  0  0  0  0  0
   -6.1476   -1.3975    2.7210 O   0  0  0  0  0  0
   -5.6655   -0.6743    2.2764 H   0  0  0  0  0  0
   -6.1125   -0.7584   -1.4608 O   0  0  0  0  0  0
   -5.5884    0.2716    0.4803 O   0  0  0  0  0  0
    4.9166    1.3229   -0.6299 O   0  0  0  0  0  0
   10.3468   -2.4492   -3.2218 O   0  0  0  0  0  0
   -6.3310   -4.2535    3.0905 O   0  0  0  0  0  0
    0.6625   -1.2903   -1.1767 O   0  0  0  0  0  0
    2.7085   -2.0780   -2.0327 O   0  0  0  0  0  0
    6.1055   -0.5911   -2.5014 O   0  0  0  0  0  0
    7.6897   -0.6437   -0.7638 O   0  0  0  0  0  0
   -3.2888    4.1574    0.7738 O   0  0  0  0  0  0
   -2.2648    2.5008   -0.4821 O   0  0  0  0  0  0
  1  2  1  0  0  0
  1  3  2  0  0  0
  1  5  1  0  0  0
  3  4  1  0  0  0
  3 78  1  0  0  0
  5  6  1  0  0  0
  5 11  2  0  0  0
  7  8  1  0  0  0
  7 12  2  0  0  0
  7 50  1  0  0  0
  9 10  1  0  0  0
  9 13  2  0  0  0
  9 74  1  0  0  0
 11 80  1  0  0  0
 11106  1  0  0  0
 12 19  1  0  0  0
 12 85  1  0  0  0
 13 15  1  0  0  0
 13 81  1  0  0  0
 14 74  1  0  0  0
 14127  2  0  0  0
 14128  1  0  0  0
 15 16  1  0  0  0
 15 17  1  0  0  0
 15 18  1  0  0  0
 19 20  1  0  0  0
 19 21  1  0  0  0
 19 22  1  0  0  0
 23 24  1  0  0  0
 23 25  1  0  0  0
 23 26  1  0  0  0
 23 47  1  0  0  0
 27 28  1  0  0  0
 27 29  1  0  0  0
 27 30  1  0  0  0
 27 68  1  0  0  0
 31 32  1  0  0  0
 31 33  1  0  0  0
 31 34  1  0  0  0
 31 72  1  0  0  0
 35 36  1  0  0  0
 35 37  1  0  0  0
 35 38  1  0  0  0
 35 78  1  0  0  0
 39 40  1  0  0  0
 39 41  1  0  0  0
 39 42  1  0  0  0
 39 95  1  0  0  0
 43 44  1  0  0  0
 43 45  1  0  0  0
 43 46  1  0  0  0
 43101  1  0  0  0
 47 48  1  0  0  0
 47 49  1  0  0  0
 47 72  1  0  0  0
 50 51  1  0  0  0
 50 52  1  0  0  0
 50 87  1  0  0  0
 53 54  1  0  0  0
 53 55  1  0  0  0
 53 87  1  0  0  0
 53 89  1  0  0  0
 56 57  1  0  0  0
 56 58  1  0  0  0
 56 97  1  0  0  0
 56109  1  0  0  0
 59 60  1  0  0  0
 59 61  1  0  0  0
 59103  1  0  0  0
 59111  1  0  0  0
 62 63  1  0  0  0
 62 64  1  0  0  0
 62 70  1  0  0  0
 62105  1  0  0  0
 65 66  1  0  0  0
 65 67  1  0  0  0
 65 89  1  0  0  0
 65105  1  0  0  0
 68 69  1  0  0  0
 68 70  1  0  0  0
 68 76  1  0  0  0
 70 71  1  0  0  0
 70 91  1  0  0  0
 72 73  1  0  0  0
 72 76  1  0  0  0
 74 75  1  0  0  0
 74 80  1  0  0  0
 76 77  1  0  0  0
 76 91  1  0  0  0
 78 79  1  0  0  0
 78 85  1  0  0  0
 80 93  1  0  0  0
 80125  1  0  0  0
 81 82  1  0  0  0
 81 93  1  0  0  0
 81121  1  0  0  0
 83 84  1  0  0  0
 83101  1  0  0  0
 83103  1  0  0  0
 83123  1  0  0  0
 85 86  1  0  0  0
 85132  1  0  0  0
 87 88  1  0  0  0
 87137  1  0  0  0
 89 90  1  0  0  0
 89128  1  0  0  0
 91 92  1  0  0  0
 91136  1  0  0  0
 93 94  1  0  0  0
 93131  1  0  0  0
 95 96  1  0  0  0
 95 99  1  0  0  0
 95133  1  0  0  0
 97 98  1  0  0  0
 97 99  1  0  0  0
 97129  1  0  0  0
 99100  1  0  0  0
 99134  1  0  0  0
101102  1  0  0  0
101135  1  0  0  0
103104  1  0  0  0
103130  1  0  0  0
105136  1  0  0  0
105137  1  0  0  0
106107  1  0  0  0
106108  1  0  0  0
106131  1  0  0  0
109110  1  0  0  0
109132  1  0  0  0
109133  1  0  0  0
111112  1  0  0  0
111134  1  0  0  0
111135  1  0  0  0
113114  1  0  0  0
113115  1  0  0  0
113116  1  0  0  0
113129  1  0  0  0
117118  1  0  0  0
117119  1  0  0  0
117120  1  0  0  0
117130  1  0  0  0
121122  1  0  0  0
123124  1  0  0  0
125126  1  0  0  0
M  END
$$$$
Molecule-069-Oxycodone
  Cerius2 10300711153D 1   1.00000                          
Structure written by Cerius2 SD Exporter
 44 48  0  0  0  0  0  0  0  0999 V2000
    1.0083   -2.4539   -0.9371 C   0  0  0  0  0  0
    0.6723   -3.2731   -1.4496 H   0  0  0  0  0  0
    2.3726   -2.3736   -0.5736 C   0  0  0  0  0  0
    2.9912   -3.1522   -0.8051 H   0  0  0  0  0  0
    0.1166   -1.4050   -0.6147 C   0  0  0  0  0  0
    0.6255   -0.3180    0.1232 C   0  0  0  0  0  0
    1.9840   -0.1851    0.3700 C   0  0  0  0  0  0
    2.8898   -1.2204    0.0692 C   0  0  0  0  0  0
    1.1621    2.8104   -0.3872 C   0  0  0  0  0  0
   -1.2848   -1.3547   -1.1118 C   0  0  0  0  0  0
   -1.2472   -1.2453   -2.1985 H   0  0  0  0  0  0
   -1.7734   -2.3119   -0.9079 H   0  0  0  0  0  0
    0.1777    2.9756   -1.4483 C   0  0  0  0  0  0
    0.6907    3.2145   -2.3849 H   0  0  0  0  0  0
   -0.4481    3.8352   -1.1956 H   0  0  0  0  0  0
   -0.7372    0.4653    2.0628 C   0  0  0  0  0  0
   -0.1130   -0.2867    2.5577 H   0  0  0  0  0  0
   -0.7129    1.3444    2.7121 H   0  0  0  0  0  0
   -0.7269    1.7389   -1.6983 C   0  0  0  0  0  0
   -1.5516    2.0243   -2.3574 H   0  0  0  0  0  0
   -0.1373    0.9873   -2.2278 H   0  0  0  0  0  0
   -0.1454    0.8336    0.6441 C   0  0  0  0  0  0
   -1.2989    1.1616   -0.3653 C   0  0  0  0  0  0
   -2.1302   -0.1750   -0.5132 C   0  0  0  0  0  0
   -2.9640    0.0325   -1.1934 H   0  0  0  0  0  0
    1.0286    1.8801    0.7372 C   0  0  0  0  0  0
    0.9519    2.4818    1.6461 H   0  0  0  0  0  0
   -2.2139   -0.0323    2.0628 C   0  0  0  0  0  0
   -2.3485   -0.7172    2.9050 H   0  0  0  0  0  0
   -2.8750    0.8225    2.2387 H   0  0  0  0  0  0
   -4.0630   -1.1543    0.8053 C   0  0  0  0  0  0
   -4.7308   -0.2918    0.7456 H   0  0  0  0  0  0
   -4.2603   -1.8102   -0.0448 H   0  0  0  0  0  0
   -4.2928   -1.7157    1.7132 H   0  0  0  0  0  0
    5.2994   -1.9426    0.1804 C   0  0  0  0  0  0
    5.4246   -2.1472   -0.8841 H   0  0  0  0  0  0
    6.2102   -1.4780    0.5585 H   0  0  0  0  0  0
    5.1326   -2.8779    0.7172 H   0  0  0  0  0  0
   -2.6391   -0.7125    0.8034 N   0  0  0  0  0  0
   -2.1736    2.1758    0.1529 O   0  0  0  0  0  0
   -1.6096    2.9459    0.3709 H   0  0  0  0  0  0
    2.1074    3.5884   -0.3802 O   0  0  0  0  0  0
    4.2033   -1.0464    0.3894 O   0  0  0  0  0  0
    2.2150    1.0637    0.8276 O   0  0  0  0  0  0
  1  2  1  0  0  0
  1  3  1  0  0  0
  1  5  2  0  0  0
  3  4  1  0  0  0
  3  8  2  0  0  0
  5  6  1  0  0  0
  5 10  1  0  0  0
  6  7  2  0  0  0
  6 22  1  0  0  0
  7  8  1  0  0  0
  7 44  1  0  0  0
  8 43  1  0  0  0
  9 13  1  0  0  0
  9 26  1  0  0  0
  9 42  2  0  0  0
 10 11  1  0  0  0
 10 12  1  0  0  0
 10 24  1  0  0  0
 13 14  1  0  0  0
 13 15  1  0  0  0
 13 19  1  0  0  0
 16 17  1  0  0  0
 16 18  1  0  0  0
 16 22  1  0  0  0
 16 28  1  0  0  0
 19 20  1  0  0  0
 19 21  1  0  0  0
 19 23  1  0  0  0
 22 23  1  0  0  0
 22 26  1  0  0  0
 23 24  1  0  0  0
 23 40  1  0  0  0
 24 25  1  0  0  0
 24 39  1  0  0  0
 26 27  1  0  0  0
 26 44  1  0  0  0
 28 29  1  0  0  0
 28 30  1  0  0  0
 28 39  1  0  0  0
 31 32  1  0  0  0
 31 33  1  0  0  0
 31 34  1  0  0  0
 31 39  1  0  0  0
 35 36  1  0  0  0
 35 37  1  0  0  0
 35 38  1  0  0  0
 35 43  1  0  0  0
 40 41  1  0  0  0
M  END
$$$$
Molecule-070-Pirbuterol
  Cerius2 10300711153D 1   1.00000                          
Structure written by Cerius2 SD Exporter
 37 37  0  0  0  0  0  0  0  0999 V2000
    2.6319   -1.4962    1.3840 C   0  0  0  0  0  0
    2.8990   -1.8518    2.3047 H   0  0  0  0  0  0
    1.4351   -1.9286    0.7857 C   0  0  0  0  0  0
    0.8412   -2.6014    1.2757 H   0  0  0  0  0  0
    3.4604   -0.5730    0.7221 C   0  0  0  0  0  0
    1.0689   -1.4284   -0.4840 C   0  0  0  0  0  0
    3.0776   -0.0988   -0.5546 C   0  0  0  0  0  0
   -3.9603    0.4820    0.0145 C   0  0  0  0  0  0
   -4.0546    0.6625   -1.0585 H   0  0  0  0  0  0
   -4.1988   -0.5652    0.2076 H   0  0  0  0  0  0
   -4.7000    1.0953    0.5343 H   0  0  0  0  0  0
   -2.2510    2.3445    0.2841 C   0  0  0  0  0  0
   -2.9563    2.9517    0.8562 H   0  0  0  0  0  0
   -1.2390    2.6076    0.6022 H   0  0  0  0  0  0
   -2.3529    2.6096   -0.7710 H   0  0  0  0  0  0
   -2.3520    0.4930    2.0154 C   0  0  0  0  0  0
   -2.6145   -0.5449    2.2237 H   0  0  0  0  0  0
   -1.3186    0.6546    2.3301 H   0  0  0  0  0  0
   -3.0014    1.1268    2.6238 H   0  0  0  0  0  0
   -2.5180    0.8236    0.4999 C   0  0  0  0  0  0
   -0.1940   -1.8485   -1.1533 C   0  0  0  0  0  0
   -0.2169   -2.9414   -1.1805 H   0  0  0  0  0  0
   -1.4640   -1.3483   -0.4143 C   0  0  0  0  0  0
   -2.3422   -1.6895   -0.9676 H   0  0  0  0  0  0
   -1.4957   -1.7997    0.5783 H   0  0  0  0  0  0
    3.9152    0.8390   -1.3333 C   0  0  0  0  0  0
    4.8622    0.3529   -1.5760 H   0  0  0  0  0  0
    3.4200    1.1074   -2.2697 H   0  0  0  0  0  0
    1.9080   -0.5437   -1.0916 N   0  0  0  0  0  0
   -1.4785    0.1344   -0.3203 N   0  0  0  0  0  0
   -1.5683    0.4887   -1.2754 H   0  0  0  0  0  0
    4.5979   -0.1605    1.3302 O   0  0  0  0  0  0
    5.1407    0.5412    0.9126 H   0  0  0  0  0  0
    4.1795    2.0342   -0.5990 O   0  0  0  0  0  0
    4.7135    2.5991   -1.1988 H   0  0  0  0  0  0
   -0.2478   -1.4183   -2.5166 O   0  0  0  0  0  0
   -0.1153   -0.4467   -2.4783 H   0  0  0  0  0  0
  1  2  1  0  0  0
  1  3  1  0  0  0
  1  5  2  0  0  0
  3  4  1  0  0  0
  3  6  2  0  0  0
  5  7  1  0  0  0
  5 32  1  0  0  0
  6 21  1  0  0  0
  6 29  1  0  0  0
  7 26  1  0  0  0
  7 29  2  0  0  0
  8  9  1  0  0  0
  8 10  1  0  0  0
  8 11  1  0  0  0
  8 20  1  0  0  0
 12 13  1  0  0  0
 12 14  1  0  0  0
 12 15  1  0  0  0
 12 20  1  0  0  0
 16 17  1  0  0  0
 16 18  1  0  0  0
 16 19  1  0  0  0
 16 20  1  0  0  0
 20 30  1  0  0  0
 21 22  1  0  0  0
 21 23  1  0  0  0
 21 36  1  0  0  0
 23 24  1  0  0  0
 23 25  1  0  0  0
 23 30  1  0  0  0
 26 27  1  0  0  0
 26 28  1  0  0  0
 26 34  1  0  0  0
 30 31  1  0  0  0
 32 33  1  0  0  0
 34 35  1  0  0  0
 36 37  1  0  0  0
M  END
$$$$
Molecule-071-Ramipril
  Cerius2 10300711153D 1   1.00000                          
Structure written by Cerius2 SD Exporter
 62 64  0  0  0  0  0  0  0  0999 V2000
    6.7008    2.6075   -1.2243 C   0  0  0  0  0  0
    7.4066    3.1483   -1.7304 H   0  0  0  0  0  0
    5.4800    3.2049   -0.8642 C   0  0  0  0  0  0
    5.2971    4.1809   -1.1076 H   0  0  0  0  0  0
    6.9505    1.2656   -0.8863 C   0  0  0  0  0  0
    7.8388    0.8308   -1.1468 H   0  0  0  0  0  0
    4.5100    2.4607   -0.1672 C   0  0  0  0  0  0
    3.6302    2.9153    0.0905 H   0  0  0  0  0  0
    5.9792    0.5213   -0.1900 C   0  0  0  0  0  0
    6.1825   -0.4533    0.0450 H   0  0  0  0  0  0
    4.7435    1.1074    0.1773 C   0  0  0  0  0  0
   -1.8949   -1.1553   -0.9445 C   0  0  0  0  0  0
   -4.8203   -1.4811   -1.8273 C   0  0  0  0  0  0
    0.6190   -0.0679    1.8449 C   0  0  0  0  0  0
   -0.0125   -0.5129   -2.4777 C   0  0  0  0  0  0
    0.9644   -0.0308   -2.5253 H   0  0  0  0  0  0
    0.0762   -1.5129   -2.9080 H   0  0  0  0  0  0
   -0.7070    0.0699   -3.0872 H   0  0  0  0  0  0
   -0.7317   -1.0323    4.9803 C   0  0  0  0  0  0
    0.3092   -0.8382    5.2454 H   0  0  0  0  0  0
   -1.3733   -0.6907    5.7947 H   0  0  0  0  0  0
   -0.8701   -2.1071    4.8485 H   0  0  0  0  0  0
    3.7081    0.3312    0.9160 C   0  0  0  0  0  0
    3.4092    0.9057    1.7957 H   0  0  0  0  0  0
    4.1278   -0.6102    1.2820 H   0  0  0  0  0  0
   -4.1684    2.8504   -0.4837 C   0  0  0  0  0  0
   -4.9247    2.6896   -1.2577 H   0  0  0  0  0  0
   -3.9154    3.9138   -0.4603 H   0  0  0  0  0  0
   -4.7051    2.3756    0.8785 C   0  0  0  0  0  0
   -4.2024    2.9219    1.6828 H   0  0  0  0  0  0
   -5.7831    2.5336    0.9686 H   0  0  0  0  0  0
   -5.2731   -0.0916    0.2143 C   0  0  0  0  0  0
   -5.9494   -0.5868    0.9171 H   0  0  0  0  0  0
   -5.8843    0.4485   -0.5157 H   0  0  0  0  0  0
   -2.9282    1.9758   -0.7674 C   0  0  0  0  0  0
   -2.9218    1.6570   -1.8136 H   0  0  0  0  0  0
   -2.0174    2.5519   -0.5804 H   0  0  0  0  0  0
    2.4661    0.0033    0.0364 C   0  0  0  0  0  0
    2.0380    0.9281   -0.3586 H   0  0  0  0  0  0
    2.8114   -0.5909   -0.8148 H   0  0  0  0  0  0
   -4.3282    0.8802    0.9529 C   0  0  0  0  0  0
   -0.5130   -0.5840   -1.0111 C   0  0  0  0  0  0
   -0.5092    0.4393   -0.6388 H   0  0  0  0  0  0
    1.3492   -0.8007    0.7752 C   0  0  0  0  0  0
    1.8403   -1.6391    1.2756 H   0  0  0  0  0  0
   -4.3296   -1.1128   -0.4714 C   0  0  0  0  0  0
   -4.3046   -2.0190    0.1435 H   0  0  0  0  0  0
   -2.9930    0.7620    0.2002 C   0  0  0  0  0  0
   -1.0903   -0.2909    3.6805 C   0  0  0  0  0  0
   -2.1315   -0.4960    3.4239 H   0  0  0  0  0  0
   -0.9823    0.7860    3.8349 H   0  0  0  0  0  0
    0.3935   -1.4311   -0.1818 N   0  0  0  0  0  0
    0.9132   -2.0552   -0.8040 H   0  0  0  0  0  0
   -3.0082   -0.5227   -0.4443 N   0  0  0  0  0  0
   -5.2778   -2.7247   -2.0916 O   0  0  0  0  0  0
   -5.5995   -2.9306   -2.9937 H   0  0  0  0  0  0
   -2.0236   -2.3238   -1.3869 O   0  0  0  0  0  0
   -4.8443   -0.6498   -2.7629 O   0  0  0  0  0  0
    0.7860    1.1609    2.0347 O   0  0  0  0  0  0
   -0.2606   -0.7696    2.6118 O   0  0  0  0  0  0
   -2.1847    0.8233    0.9373 H   0  0  0  0  0  0
   -4.2190    0.5616    1.9957 H   0  0  0  0  0  0
  1  2  1  0  0  0
  1  3  2  0  0  0
  1  5  1  0  0  0
  3  4  1  0  0  0
  3  7  1  0  0  0
  5  6  1  0  0  0
  5  9  2  0  0  0
  7  8  1  0  0  0
  7 11  2  0  0  0
  9 10  1  0  0  0
  9 11  1  0  0  0
 11 23  1  0  0  0
 12 42  1  0  0  0
 12 54  1  0  0  0
 12 57  2  0  0  0
 13 46  1  0  0  0
 13 55  1  0  0  0
 13 58  2  0  0  0
 14 44  1  0  0  0
 14 59  2  0  0  0
 14 60  1  0  0  0
 15 16  1  0  0  0
 15 17  1  0  0  0
 15 18  1  0  0  0
 15 42  1  0  0  0
 19 20  1  0  0  0
 19 21  1  0  0  0
 19 22  1  0  0  0
 19 49  1  0  0  0
 23 24  1  0  0  0
 23 25  1  0  0  0
 23 38  1  0  0  0
 26 27  1  0  0  0
 26 28  1  0  0  0
 26 29  1  0  0  0
 26 35  1  0  0  0
 29 30  1  0  0  0
 29 31  1  0  0  0
 29 41  1  0  0  0
 32 33  1  0  0  0
 32 34  1  0  0  0
 32 41  1  0  0  0
 32 46  1  0  0  0
 35 36  1  0  0  0
 35 37  1  0  0  0
 35 48  1  0  0  0
 38 39  1  0  0  0
 38 40  1  0  0  0
 38 44  1  0  0  0
 41 48  1  0  0  0
 42 43  1  0  0  0
 42 52  1  0  0  0
 44 45  1  0  0  0
 44 52  1  0  0  0
 46 47  1  0  0  0
 46 54  1  0  0  0
 48 54  1  0  0  0
 49 50  1  0  0  0
 49 51  1  0  0  0
 49 60  1  0  0  0
 52 53  1  0  0  0
 55 56  1  0  0  0
 61 48  1  0  0  0
 62 41  1  0  0  0
M  END
$$$$
Molecule-072-Ziprasidone
  Cerius2 10300711153D 1   1.00000                          
Structure written by Cerius2 SD Exporter
 49 53  0  0  0  0  0  0  0  0999 V2000
    5.4463    0.0942    0.0589 C   0  0  0  0  0  0
    6.6611    0.6362   -0.3890 C   0  0  0  0  0  0
    5.4825   -0.8314    1.1315 C   0  0  0  0  0  0
    4.6455   -1.2878    1.4806 H   0  0  0  0  0  0
    7.8908    0.3135    0.2135 C   0  0  0  0  0  0
    8.7627    0.7257   -0.1265 H   0  0  0  0  0  0
    6.7071   -1.1629    1.7461 C   0  0  0  0  0  0
    6.7247   -1.8267    2.5243 H   0  0  0  0  0  0
    7.9089   -0.5891    1.2913 C   0  0  0  0  0  0
    8.7950   -0.8319    1.7408 H   0  0  0  0  0  0
   -4.2891    0.3674    0.8520 C   0  0  0  0  0  0
   -3.7894    0.9902    1.4916 H   0  0  0  0  0  0
   -5.7415   -1.3067   -0.9154 C   0  0  0  0  0  0
   -6.2860   -1.8975   -1.5479 H   0  0  0  0  0  0
   -5.6633    0.5648    0.6410 C   0  0  0  0  0  0
   -3.6155   -0.6818    0.1716 C   0  0  0  0  0  0
   -6.3704   -0.2597   -0.2284 C   0  0  0  0  0  0
   -4.3585   -1.5188   -0.7166 C   0  0  0  0  0  0
    4.3717    0.5899   -0.7091 C   0  0  0  0  0  0
   -7.8058    1.1864    0.5574 C   0  0  0  0  0  0
   -6.5531    1.5745    1.2223 C   0  0  0  0  0  0
   -6.6292    1.4693    2.3060 H   0  0  0  0  0  0
   -6.2525    2.5860    0.9433 H   0  0  0  0  0  0
   -2.1493   -0.8526    0.3934 C   0  0  0  0  0  0
   -1.8742   -0.4450    1.3691 H   0  0  0  0  0  0
   -1.8918   -1.9137    0.4233 H   0  0  0  0  0  0
   -1.3116   -0.1426   -0.7051 C   0  0  0  0  0  0
   -1.6967   -0.4719   -1.6749 H   0  0  0  0  0  0
   -1.4650    0.9390   -0.6395 H   0  0  0  0  0  0
    0.8510   -0.0639    0.6182 C   0  0  0  0  0  0
    0.4843   -0.6790    1.4428 H   0  0  0  0  0  0
    0.6450    0.9844    0.8560 H   0  0  0  0  0  0
    0.9163   -0.1141   -1.9033 C   0  0  0  0  0  0
    0.2776    0.3236   -2.6768 H   0  0  0  0  0  0
    1.2957   -1.0590   -2.2998 H   0  0  0  0  0  0
    2.3886   -0.2601    0.5210 C   0  0  0  0  0  0
    2.8118    0.1318    1.4501 H   0  0  0  0  0  0
    2.5781   -1.3349    0.4588 H   0  0  0  0  0  0
    2.1248    0.8372   -1.6864 C   0  0  0  0  0  0
    2.6351    0.9219   -2.6507 H   0  0  0  0  0  0
    1.7483    1.8302   -1.4256 H   0  0  0  0  0  0
   -7.6468    0.1338   -0.2587 N   0  0  0  0  0  0
   -8.3531   -0.2712   -0.7850 H   0  0  0  0  0  0
    4.8622    1.4157   -1.6589 N   0  0  0  0  0  0
    3.0106    0.3842   -0.6198 N   0  0  0  0  0  0
    0.1543   -0.4447   -0.6504 N   0  0  0  0  0  0
   -8.9027    1.7619    0.7242 O   0  0  0  0  0  0
    6.5170    1.7061   -1.7337 S   0  0  0  0  0  0
   -3.6513   -2.7973   -1.5819 Cl  0  0  0  0  0  0
  1  2  2  0  0  0
  1  3  1  0  0  0
  1 19  1  0  0  0
  2  5  1  0  0  0
  2 48  1  0  0  0
  3  4  1  0  0  0
  3  7  2  0  0  0
  5  6  1  0  0  0
  5  9  2  0  0  0
  7  8  1  0  0  0
  7  9  1  0  0  0
  9 10  1  0  0  0
 11 12  1  0  0  0
 11 15  2  0  0  0
 11 16  1  0  0  0
 13 14  1  0  0  0
 13 17  2  0  0  0
 13 18  1  0  0  0
 15 17  1  0  0  0
 15 21  1  0  0  0
 16 18  2  0  0  0
 16 24  1  0  0  0
 17 42  1  0  0  0
 18 49  1  0  0  0
 19 44  2  0  0  0
 19 45  1  0  0  0
 20 21  1  0  0  0
 20 42  1  0  0  0
 20 47  2  0  0  0
 21 22  1  0  0  0
 21 23  1  0  0  0
 24 25  1  0  0  0
 24 26  1  0  0  0
 24 27  1  0  0  0
 27 28  1  0  0  0
 27 29  1  0  0  0
 27 46  1  0  0  0
 30 31  1  0  0  0
 30 32  1  0  0  0
 30 36  1  0  0  0
 30 46  1  0  0  0
 33 34  1  0  0  0
 33 35  1  0  0  0
 33 39  1  0  0  0
 33 46  1  0  0  0
 36 37  1  0  0  0
 36 38  1  0  0  0
 36 45  1  0  0  0
 39 40  1  0  0  0
 39 41  1  0  0  0
 39 45  1  0  0  0
 42 43  1  0  0  0
 44 48  1  0  0  0
M  END
$$$$
Molecule-073-Furosemide
  Cerius2 10300711153D 1   1.00000                          

 32 33  0  0  0  0  0  0  0  0999 V2000
   -2.6045    2.9899   -1.2732 N   0  0  0  0  0  0
   -2.8492    1.4803   -0.6833 S   0  0  0  0  0  0
   -3.7205    1.6486    0.6330 O   0  0  0  0  0  0
   -3.6866    0.7002   -1.7829 O   0  0  0  0  0  0
   -1.3520    0.6336   -0.3384 C   0  0  0  0  0  0
   -0.1075    1.2538   -0.5966 C   0  0  0  0  0  0
    1.1281    0.6039   -0.3419 C   0  0  0  0  0  0
    2.3213    1.2558   -0.7203 C   0  0  0  0  0  0
    3.3542    0.6371   -1.0577 O   0  0  0  0  0  0
    2.4108    2.6029   -0.7812 O   0  0  0  0  0  0
    1.1016   -0.6946    0.2430 C   0  0  0  0  0  0
    2.1842   -1.4161    0.6326 N   0  0  0  0  0  0
    3.2126   -0.9857    1.5316 C   0  0  0  0  0  0
    4.5360   -1.4659    1.0883 C   0  0  0  0  0  0
    5.6420   -0.6852    0.7595 C   0  0  0  0  0  0
    6.6618   -1.5534    0.4043 C   0  0  0  0  0  0
    6.1538   -2.8393    0.5295 C   0  0  0  0  0  0
    4.8672   -2.7745    0.9463 O   0  0  0  0  0  0
   -0.1387   -1.3277    0.4672 C   0  0  0  0  0  0
   -1.3564   -0.6800    0.1862 C   0  0  0  0  0  0
   -2.7860   -1.5364    0.5113 Cl  0  0  0  0  0  0
   -0.1016    2.1960   -0.9979 H   0  0  0  0  0  0
    3.2187    0.0982    1.6674 H   0  0  0  0  0  0
    3.0119   -1.4358    2.5046 H   0  0  0  0  0  0
    5.6945    0.3346    0.7733 H   0  0  0  0  0  0
    7.6046   -1.2972    0.1078 H   0  0  0  0  0  0
    6.6673   -3.7016    0.3383 H   0  0  0  0  0  0
   -0.1565   -2.2747    0.8594 H   0  0  0  0  0  0
   -2.4729    3.1117   -2.1885 H   0  0  0  0  0  0
   -2.6200    3.7193   -0.6920 H   0  0  0  0  0  0
    3.2560    3.0093   -1.0639 H   0  0  0  0  0  0
    2.2096   -2.3524    0.3713 H   0  0  0  0  0  0
  1  2  1  0  0  0
  1 29  1  0  0  0
  1 30  1  0  0  0
  2  3  2  0  0  0
  2  4  2  0  0  0
  2  5  1  0  0  0
  5  6  2  0  0  0
  6  7  1  0  0  0
  6 22  1  0  0  0
  7  8  1  0  0  0
  7 11  2  0  0  0
  8  9  2  0  0  0
  8 10  1  0  0  0
 10 31  1  0  0  0
 11 12  1  0  0  0
 11 19  1  0  0  0
 12 13  1  0  0  0
 12 32  1  0  0  0
 13 14  1  0  0  0
 13 23  1  0  0  0
 13 24  1  0  0  0
 14 15  2  0  0  0
 15 16  1  0  0  0
 15 25  1  0  0  0
 16 17  2  0  0  0
 16 26  1  0  0  0
 17 18  1  0  0  0
 17 27  1  0  0  0
 18 14  1  0  0  0
 19 20  2  0  0  0
 19 28  1  0  0  0
 20  5  1  0  0  0
 20 21  1  0  0  0
M  END
$$$$
Molecule-074_Sulfasalazine
  Cerius2 10300711153D 1   1.00000                          
Structure written by Cerius2 SD Exporter
 42 44  0  0  0  0  0  0  0  0999 V2000
    8.2179   -0.2637   -0.3412 C   0  0  0  0  0  0
    8.9322   -0.4191   -1.0564 H   0  0  0  0  0  0
    8.5987    0.0155    0.9836 C   0  0  0  0  0  0
    9.5867    0.0652    1.2416 H   0  0  0  0  0  0
   -4.9933   -0.3643    0.3656 C   0  0  0  0  0  0
   -4.4884   -1.2473    0.4743 H   0  0  0  0  0  0
   -4.9428    1.9997   -0.1929 C   0  0  0  0  0  0
   -4.4358    2.8399   -0.4846 H   0  0  0  0  0  0
   -0.0961   -1.4550   -0.3176 C   0  0  0  0  0  0
   -0.5879   -2.3043   -0.0265 H   0  0  0  0  0  0
   -0.0937    0.9117   -0.8652 C   0  0  0  0  0  0
   -0.5818    1.8033   -0.9771 H   0  0  0  0  0  0
   -6.3225    2.0800    0.0517 C   0  0  0  0  0  0
   -6.8033    2.9758   -0.0645 H   0  0  0  0  0  0
    1.2882   -1.5163   -0.5692 C   0  0  0  0  0  0
    1.7725   -2.4110   -0.4540 H   0  0  0  0  0  0
    1.2907    0.8530   -1.1173 C   0  0  0  0  0  0
    1.7774    1.7062   -1.4062 H   0  0  0  0  0  0
    6.8536   -0.3290   -0.6817 C   0  0  0  0  0  0
    6.5897   -0.5324   -1.6467 H   0  0  0  0  0  0
   -6.3908   -0.3119    0.6201 C   0  0  0  0  0  0
   -0.8032   -0.2434   -0.4625 C   0  0  0  0  0  0
   -4.2640    0.7776   -0.0386 C   0  0  0  0  0  0
   -7.0446    0.9411    0.4539 C   0  0  0  0  0  0
    1.9962   -0.3628   -0.9742 C   0  0  0  0  0  0
    7.5973    0.2251    1.9480 C   0  0  0  0  0  0
    7.8445    0.4296    2.9178 H   0  0  0  0  0  0
    5.8788   -0.1113    0.3207 C   0  0  0  0  0  0
   -7.0779   -1.4829    1.0231 C   0  0  0  0  0  0
    4.5407   -0.1390    0.1573 N   0  0  0  0  0  0
    3.9988    0.0288    0.9405 H   0  0  0  0  0  0
    6.2906    0.1551    1.5863 N   0  0  0  0  0  0
   -2.1328   -0.2509   -0.2063 N   0  0  0  0  0  0
   -2.9339    0.7689   -0.2903 N   0  0  0  0  0  0
   -8.3697    1.1309    0.6626 O   0  0  0  0  0  0
   -8.9353    0.3855    0.9436 H   0  0  0  0  0  0
   -8.4025   -1.5333    1.2877 O   0  0  0  0  0  0
   -8.7982   -2.3871    1.5614 H   0  0  0  0  0  0
   -6.4970   -2.5826    1.1674 O   0  0  0  0  0  0
    4.1382   -1.8768   -1.8087 O   0  0  0  0  0  0
    4.1561    0.6561   -2.3476 O   0  0  0  0  0  0
    3.7173   -0.4373   -1.2789 S   0  0  0  0  0  0
  1  2  1  0  0  0
  1  3  1  0  0  0
  1 19  2  0  0  0
  3  4  1  0  0  0
  3 26  2  0  0  0
  5  6  1  0  0  0
  5 21  1  0  0  0
  5 23  2  0  0  0
  7  8  1  0  0  0
  7 13  2  0  0  0
  7 23  1  0  0  0
  9 10  1  0  0  0
  9 15  2  0  0  0
  9 22  1  0  0  0
 11 12  1  0  0  0
 11 17  1  0  0  0
 11 22  2  0  0  0
 13 14  1  0  0  0
 13 24  1  0  0  0
 15 16  1  0  0  0
 15 25  1  0  0  0
 17 18  1  0  0  0
 17 25  2  0  0  0
 19 20  1  0  0  0
 19 28  1  0  0  0
 21 24  2  0  0  0
 21 29  1  0  0  0
 22 33  1  0  0  0
 23 34  1  0  0  0
 24 35  1  0  0  0
 25 42  1  0  0  0
 26 27  1  0  0  0
 26 32  1  0  0  0
 28 30  1  0  0  0
 28 32  2  0  0  0
 29 37  1  0  0  0
 29 39  2  0  0  0
 30 31  1  0  0  0
 30 42  1  0  0  0
 33 34  2  0  0  0
 35 36  1  0  0  0
 37 38  1  0  0  0
 40 42  2  0  0  0
 41 42  2  0  0  0
M  END
$$$$
Molecule-075-Terbutaline
  Cerius2 10300711153D 1   1.00000                          

 35 35  0  0  0  0  0  0  0  0999 V2000
   -4.6732   -0.7450    1.2876 C   0  0  0  0  0  0
   -3.8413    0.5645    1.4416 C   0  0  0  0  0  0
   -2.7171    0.3332    2.4979 C   0  0  0  0  0  0
   -4.7899    1.7184    1.8905 C   0  0  0  0  0  0
   -3.2687    0.8116    0.0853 N   0  0  0  0  0  0
   -2.4642    2.0347   -0.1699 C   0  0  0  0  0  0
   -1.9333    2.0443   -1.6267 C   0  0  0  0  0  0
   -1.2193    3.2591   -1.8583 O   0  0  0  0  0  0
   -1.0515    0.8799   -1.9377 C   0  0  0  0  0  0
    0.2056    0.7341   -1.3017 C   0  0  0  0  0  0
    1.0346   -0.3678   -1.5816 C   0  0  0  0  0  0
    2.2276   -0.4841   -0.9552 O   0  0  0  0  0  0
    0.6195   -1.3398   -2.5090 C   0  0  0  0  0  0
   -0.6223   -1.2101   -3.1545 C   0  0  0  0  0  0
   -1.0122   -2.1497   -4.0458 O   0  0  0  0  0  0
   -1.4512   -0.1080   -2.8705 C   0  0  0  0  0  0
   -5.4603   -0.6160    0.5406 H   0  0  0  0  0  0
   -4.0362   -1.5733    0.9676 H   0  0  0  0  0  0
   -5.1437   -1.0243    2.2332 H   0  0  0  0  0  0
   -2.1592    1.2519    2.6847 H   0  0  0  0  0  0
   -3.1412    0.0025    3.4487 H   0  0  0  0  0  0
   -2.0156   -0.4282    2.1501 H   0  0  0  0  0  0
   -4.2282    2.6344    2.0807 H   0  0  0  0  0  0
   -5.5310    1.9255    1.1155 H   0  0  0  0  0  0
   -5.3161    1.4532    2.8103 H   0  0  0  0  0  0
   -2.6704    0.0101   -0.1289 H   0  0  0  0  0  0
   -1.6240    2.0998    0.5234 H   0  0  0  0  0  0
   -3.0883    2.9202   -0.0326 H   0  0  0  0  0  0
   -2.8040    2.0576   -2.2903 H   0  0  0  0  0  0
   -0.9471    3.2267   -2.8006 H   0  0  0  0  0  0
    0.5280    1.4336   -0.6287 H   0  0  0  0  0  0
    2.8171   -1.2455   -1.1397 H   0  0  0  0  0  0
    1.2193   -2.1410   -2.7152 H   0  0  0  0  0  0
   -1.8745   -2.0755   -4.5067 H   0  0  0  0  0  0
   -2.3523   -0.0342   -3.3483 H   0  0  0  0  0  0
  1  2  1  0  0  0
  1 17  1  0  0  0
  1 18  1  0  0  0
  1 19  1  0  0  0
  2  3  1  0  0  0
  2  4  1  0  0  0
  2  5  1  0  0  0
  3 20  1  0  0  0
  3 21  1  0  0  0
  3 22  1  0  0  0
  4 23  1  0  0  0
  4 24  1  0  0  0
  4 25  1  0  0  0
  5  6  1  0  0  0
  5 26  1  0  0  0
  6  7  1  0  0  0
  6 27  1  0  0  0
  6 28  1  0  0  0
  7  8  1  0  0  0
  7  9  1  0  0  0
  7 29  1  0  0  0
  8 30  1  0  0  0
  9 10  2  0  0  0
 10 11  1  0  0  0
 10 31  1  0  0  0
 11 12  1  0  0  0
 11 13  2  0  0  0
 12 32  1  0  0  0
 13 14  1  0  0  0
 13 33  1  0  0  0
 14 15  1  0  0  0
 14 16  2  0  0  0
 15 34  1  0  0  0
 16  9  1  0  0  0
 16 35  1  0  0  0
M  END
$$$$
Molecule-076-Chlorthalidone
  Cerius2 10300711153D 1   1.00000                          
Structure written by Cerius2 SD Exporter
 33 35  0  0  0  0  0  0  0  0999 V2000
    2.9408   -0.2290   -2.5886 C   0  0  0  0  0  0
    3.4164   -0.0818   -3.4818 H   0  0  0  0  0  0
    2.1922   -1.4091   -2.3779 C   0  0  0  0  0  0
    2.1274   -2.1095   -3.1203 H   0  0  0  0  0  0
    0.6633   -2.7222    2.6245 C   0  0  0  0  0  0
   -0.3417   -2.6667    2.4440 H   0  0  0  0  0  0
    3.0357    0.7488   -1.5757 C   0  0  0  0  0  0
    3.5745    1.6050   -1.7231 H   0  0  0  0  0  0
    1.5352   -1.6287   -1.1483 C   0  0  0  0  0  0
    0.9942   -2.4821   -0.9920 H   0  0  0  0  0  0
    2.9300   -1.9031    2.3637 C   0  0  0  0  0  0
    3.5825   -1.2193    1.9728 H   0  0  0  0  0  0
    1.1386   -3.7743    3.4247 C   0  0  0  0  0  0
    0.4709   -4.4513    3.8039 H   0  0  0  0  0  0
    1.5495   -1.7650    2.0782 C   0  0  0  0  0  0
    2.3697    0.5163   -0.3588 C   0  0  0  0  0  0
    1.6389   -0.6509   -0.1395 C   0  0  0  0  0  0
    3.4252   -2.9534    3.1698 C   0  0  0  0  0  0
    2.5133   -3.8979    3.7015 C   0  0  0  0  0  0
    2.2734    1.2869    0.7904 C   0  0  0  0  0  0
    1.0615   -0.6389    1.2194 C   0  0  0  0  0  0
    1.5197    0.6279    1.6846 N   0  0  0  0  0  0
    1.3070    0.9831    2.5607 H   0  0  0  0  0  0
    5.9986   -1.8457    2.8033 N   0  0  0  0  0  0
    6.1398   -1.0572    3.2812 H   0  0  0  0  0  0
    6.3567   -1.9571    1.9493 H   0  0  0  0  0  0
   -0.3553   -0.5443    1.1332 O   0  0  0  0  0  0
   -0.5110    0.2841    0.6372 H   0  0  0  0  0  0
    2.7885    2.4087    0.9856 O   0  0  0  0  0  0
    5.4319   -2.9961    5.0456 O   0  0  0  0  0  0
    5.7241   -4.4097    2.8803 O   0  0  0  0  0  0
    5.1412   -3.0646    3.4868 S   0  0  0  0  0  0
    2.9971   -5.2021    4.6741 Cl  0  0  0  0  0  0
  1  2  1  0  0  0
  1  3  1  0  0  0
  1  7  2  0  0  0
  3  4  1  0  0  0
  3  9  2  0  0  0
  5  6  1  0  0  0
  5 13  1  0  0  0
  5 15  2  0  0  0
  7  8  1  0  0  0
  7 16  1  0  0  0
  9 10  1  0  0  0
  9 17  1  0  0  0
 11 12  1  0  0  0
 11 15  1  0  0  0
 11 18  2  0  0  0
 13 14  1  0  0  0
 13 19  2  0  0  0
 15 21  1  0  0  0
 16 17  2  0  0  0
 16 20  1  0  0  0
 17 21  1  0  0  0
 18 19  1  0  0  0
 18 32  1  0  0  0
 19 33  1  0  0  0
 20 22  1  0  0  0
 20 29  2  0  0  0
 21 22  1  0  0  0
 21 27  1  0  0  0
 22 23  1  0  0  0
 24 25  1  0  0  0
 24 26  1  0  0  0
 24 32  1  0  0  0
 27 28  1  0  0  0
 30 32  2  0  0  0
 31 32  2  0  0  0
M  END
$$$$
Molecule-077-Tolrestat
  Cerius2 10300711153D 1   1.00000                          
Structure written by Cerius2 SD Exporter
 38 39  0  0  0  0  0  0  0  0999 V2000
    0.7738   -2.1674   -1.0298 C   0  0  0  0  0  0
   -0.3109   -2.8857   -0.4239 C   0  0  0  0  0  0
    0.6007   -0.7943   -1.3123 C   0  0  0  0  0  0
    1.3434   -0.2431   -1.7497 H   0  0  0  0  0  0
   -1.5417   -2.2133   -0.0957 C   0  0  0  0  0  0
    2.1424   -4.2026   -1.0768 C   0  0  0  0  0  0
    3.0125   -4.6969   -1.2988 H   0  0  0  0  0  0
    1.0939   -4.9201   -0.4947 C   0  0  0  0  0  0
    1.2054   -5.9191   -0.3025 H   0  0  0  0  0  0
   -0.5925   -0.1386   -1.0042 C   0  0  0  0  0  0
   -0.6707    0.8549   -1.2275 H   0  0  0  0  0  0
    2.0030   -2.8248   -1.3422 C   0  0  0  0  0  0
   -0.1056   -4.2713   -0.1722 C   0  0  0  0  0  0
   -1.6624   -0.8254   -0.4007 C   0  0  0  0  0  0
    4.2113   -2.6028    1.0160 C   0  0  0  0  0  0
    3.1176   -2.1717   -1.9118 C   0  0  0  0  0  0
   -2.6850   -2.9521    0.5568 C   0  0  0  0  0  0
    3.9311   -1.3520    0.2830 C   0  0  0  0  0  0
    2.9304   -1.0004    0.5424 H   0  0  0  0  0  0
    4.6153   -0.5995    0.6863 H   0  0  0  0  0  0
    5.2253   -0.8601   -1.7576 C   0  0  0  0  0  0
    6.1290   -1.2409   -1.2753 H   0  0  0  0  0  0
    5.3485   -1.0301   -2.8256 H   0  0  0  0  0  0
    5.1805    0.2208   -1.6069 H   0  0  0  0  0  0
   -3.1869    1.2168   -0.3246 C   0  0  0  0  0  0
   -3.1622    1.4580   -1.3885 H   0  0  0  0  0  0
   -4.2024    1.3632    0.0440 H   0  0  0  0  0  0
   -2.5171    1.8834    0.2208 H   0  0  0  0  0  0
   -3.1187   -3.9689   -0.2609 F   0  0  0  0  0  0
   -3.8311   -2.2569    0.8608 F   0  0  0  0  0  0
   -2.2844   -3.4721    1.7651 F   0  0  0  0  0  0
    4.0539   -1.4809   -1.1681 N   0  0  0  0  0  0
    3.2822   -3.1600    1.8219 O   0  0  0  0  0  0
    3.5021   -3.9875    2.2969 H   0  0  0  0  0  0
    5.3202   -3.1738    0.9249 O   0  0  0  0  0  0
   -2.8144   -0.1511   -0.1134 O   0  0  0  0  0  0
    3.1585   -2.3339   -3.6493 S   0  0  0  0  0  0
   -0.8252   -4.8542    0.2531 H   0  0  0  0  0  0
  1  2  1  0  0  0
  1  3  1  0  0  0
  1 12  2  0  0  0
  2  5  1  0  0  0
  2 13  2  0  0  0
  3  4  1  0  0  0
  3 10  2  0  0  0
  5 14  2  0  0  0
  5 17  1  0  0  0
  6  7  1  0  0  0
  6  8  2  0  0  0
  6 12  1  0  0  0
  8  9  1  0  0  0
  8 13  1  0  0  0
 10 11  1  0  0  0
 10 14  1  0  0  0
 12 16  1  0  0  0
 13 38  1  0  0  0
 14 36  1  0  0  0
 15 18  1  0  0  0
 15 33  1  0  0  0
 15 35  2  0  0  0
 16 32  1  0  0  0
 16 37  2  0  0  0
 17 29  1  0  0  0
 17 30  1  0  0  0
 17 31  1  0  0  0
 18 19  1  0  0  0
 18 20  1  0  0  0
 18 32  1  0  0  0
 21 22  1  0  0  0
 21 23  1  0  0  0
 21 24  1  0  0  0
 21 32  1  0  0  0
 25 26  1  0  0  0
 25 27  1  0  0  0
 25 28  1  0  0  0
 25 36  1  0  0  0
 33 34  1  0  0  0
M  END
$$$$
Molecule-078-Hydroflumethiazide
  Cerius2 10300711153D 1   1.00000                          
Structure written by Cerius2 SD Exporter
 28 29  0  0  0  0  0  0  0  0999 V2000
   -0.2864    1.6547    0.3518 C   0  0  0  0  0  0
   -0.2972    2.6680    0.4942 H   0  0  0  0  0  0
   -0.1677   -1.1051   -0.0529 C   0  0  0  0  0  0
   -0.0911   -2.1171   -0.1912 H   0  0  0  0  0  0
   -1.5056    0.9244    0.3126 C   0  0  0  0  0  0
    0.9683    1.0370    0.1960 C   0  0  0  0  0  0
   -1.4351   -0.4894    0.0912 C   0  0  0  0  0  0
    1.0177   -0.3512   -0.0028 C   0  0  0  0  0  0
   -2.7970    1.6684    0.4954 C   0  0  0  0  0  0
    3.4480    1.4104    0.0750 C   0  0  0  0  0  0
    3.9064    2.1104   -0.6272 H   0  0  0  0  0  0
    3.9680    1.5107    1.0312 H   0  0  0  0  0  0
   -3.5763    1.0708    1.4535 F   0  0  0  0  0  0
   -3.4680    1.7160   -0.6990 F   0  0  0  0  0  0
   -2.6713    2.9755    0.9070 F   0  0  0  0  0  0
    3.6538    0.1319   -0.4164 N   0  0  0  0  0  0
    4.4418   -0.0698   -0.8703 H   0  0  0  0  0  0
   -2.5030   -2.9531   -0.7623 N   0  0  0  0  0  0
   -2.2127   -3.6992   -0.2835 H   0  0  0  0  0  0
   -2.6320   -2.9990   -1.6850 H   0  0  0  0  0  0
    2.0838    1.8081    0.2545 N   0  0  0  0  0  0
    1.9443    2.7506    0.4470 H   0  0  0  0  0  0
   -4.1008   -0.9602   -0.7047 O   0  0  0  0  0  0
   -3.2131   -2.0090    1.5056 O   0  0  0  0  0  0
    2.9777   -1.8759    1.1381 O   0  0  0  0  0  0
    2.6171   -2.0493   -1.4375 O   0  0  0  0  0  0
   -2.8324   -1.5587    0.0338 S   0  0  0  0  0  0
    2.5783   -1.0816   -0.1782 S   0  0  0  0  0  0
  1  2  1  0  0  0
  1  5  2  0  0  0
  1  6  1  0  0  0
  3  4  1  0  0  0
  3  7  2  0  0  0
  3  8  1  0  0  0
  5  7  1  0  0  0
  5  9  1  0  0  0
  6  8  2  0  0  0
  6 21  1  0  0  0
  7 27  1  0  0  0
  8 28  1  0  0  0
  9 13  1  0  0  0
  9 14  1  0  0  0
  9 15  1  0  0  0
 10 11  1  0  0  0
 10 12  1  0  0  0
 10 16  1  0  0  0
 10 21  1  0  0  0
 16 17  1  0  0  0
 16 28  1  0  0  0
 18 19  1  0  0  0
 18 20  1  0  0  0
 18 27  1  0  0  0
 21 22  1  0  0  0
 23 27  2  0  0  0
 24 27  2  0  0  0
 25 28  2  0  0  0
 26 28  2  0  0  0
M  END
$$$$
Molecule-079-Sumatriptan
  Cerius2 10300711153D 1   1.00000                          
Structure written by Cerius2 SD Exporter
 41 42  0  0  0  0  0  0  0  0999 V2000
   -0.3715   -1.3013   -0.4485 C   0  0  0  0  0  0
   -1.0615   -2.4717   -0.7584 C   0  0  0  0  0  0
   -0.9121   -0.3616    0.4486 C   0  0  0  0  0  0
   -0.4004    0.4987    0.6566 H   0  0  0  0  0  0
   -2.3088   -2.7555   -0.1832 C   0  0  0  0  0  0
   -2.8052   -3.6176   -0.4172 H   0  0  0  0  0  0
   -2.8602   -1.8217    0.7190 C   0  0  0  0  0  0
   -3.7731   -2.0231    1.1347 H   0  0  0  0  0  0
    0.8182   -1.3179   -1.1775 C   0  0  0  0  0  0
   -2.1736   -0.6206    1.0429 C   0  0  0  0  0  0
    0.7927   -2.5080   -1.9105 C   0  0  0  0  0  0
    1.5213   -2.8259   -2.5532 H   0  0  0  0  0  0
    1.8922   -0.2986   -1.1885 C   0  0  0  0  0  0
    2.5868   -0.5096   -2.0059 H   0  0  0  0  0  0
    1.4350    0.6723   -1.3849 H   0  0  0  0  0  0
    2.6971   -0.2654    0.1390 C   0  0  0  0  0  0
    2.0538    0.0491    0.9656 H   0  0  0  0  0  0
    3.0076   -1.2952    0.3449 H   0  0  0  0  0  0
   -2.7791    0.3658    1.9720 C   0  0  0  0  0  0
   -3.4354   -0.1296    2.6902 H   0  0  0  0  0  0
   -2.0069    0.8860    2.5423 H   0  0  0  0  0  0
   -2.7148    2.2842   -1.3046 C   0  0  0  0  0  0
   -2.5707    1.2286   -1.5454 H   0  0  0  0  0  0
   -3.6264    2.6408   -1.7883 H   0  0  0  0  0  0
   -1.8681    2.8474   -1.6994 H   0  0  0  0  0  0
    4.9363    0.2807    1.0945 C   0  0  0  0  0  0
    5.8365    0.8820    0.9509 H   0  0  0  0  0  0
    4.5563    0.4544    2.1044 H   0  0  0  0  0  0
    5.2354   -0.7660    1.0085 H   0  0  0  0  0  0
    3.6048    2.0791    0.0414 C   0  0  0  0  0  0
    3.0894    2.3896    0.9538 H   0  0  0  0  0  0
    4.5246    2.6611   -0.0550 H   0  0  0  0  0  0
    2.9809    2.3342   -0.8149 H   0  0  0  0  0  0
   -0.3401   -3.1798   -1.6386 N   0  0  0  0  0  0
   -0.5950   -4.0361   -2.0182 H   0  0  0  0  0  0
   -2.7955    2.4862    0.0664 N   0  0  0  0  0  0
   -2.3215    3.1952    0.4463 H   0  0  0  0  0  0
    3.9082    0.6163    0.0644 N   0  0  0  0  0  0
   -4.9280    0.8921    0.2608 O   0  0  0  0  0  0
   -4.3817    2.6014    2.1263 O   0  0  0  0  0  0
   -3.7543    1.5916    1.0735 S   0  0  0  0  0  0
  1  2  2  0  0  0
  1  3  1  0  0  0
  1  9  1  0  0  0
  2  5  1  0  0  0
  2 34  1  0  0  0
  3  4  1  0  0  0
  3 10  2  0  0  0
  5  6  1  0  0  0
  5  7  2  0  0  0
  7  8  1  0  0  0
  7 10  1  0  0  0
  9 11  2  0  0  0
  9 13  1  0  0  0
 10 19  1  0  0  0
 11 12  1  0  0  0
 11 34  1  0  0  0
 13 14  1  0  0  0
 13 15  1  0  0  0
 13 16  1  0  0  0
 16 17  1  0  0  0
 16 18  1  0  0  0
 16 38  1  0  0  0
 19 20  1  0  0  0
 19 21  1  0  0  0
 19 41  1  0  0  0
 22 23  1  0  0  0
 22 24  1  0  0  0
 22 25  1  0  0  0
 22 36  1  0  0  0
 26 27  1  0  0  0
 26 28  1  0  0  0
 26 29  1  0  0  0
 26 38  1  0  0  0
 30 31  1  0  0  0
 30 32  1  0  0  0
 30 33  1  0  0  0
 30 38  1  0  0  0
 34 35  1  0  0  0
 36 37  1  0  0  0
 36 41  1  0  0  0
 39 41  2  0  0  0
 40 41  2  0  0  0
M  END
$$$$
Molecule-080-Mibefradil
  Cerius2 10300711153D 1   1.00000                          

 74 77  0  0  0  0  0  0  0  0999 V2000
    1.3545   -1.0699   -0.9732 C   0  0  0  0  0  0
    0.5634   -2.0166   -0.2350 O   0  0  0  0  0  0
    0.6622   -3.3779   -0.7054 C   0  0  0  0  0  0
   -0.1931   -4.2552    0.1103 C   0  0  0  0  0  0
    0.0657   -4.3952    1.3279 O   0  0  0  0  0  0
   -1.2265   -4.9061   -0.4959 O   0  0  0  0  0  0
   -2.2790   -5.7959   -0.0400 C   0  0  0  0  0  0
   -3.4245   -4.9858    0.6885 C   0  0  0  0  0  0
   -3.0538   -4.1145    1.9252 C   0  0  0  0  0  0
   -4.1856   -3.3131    2.4960 N   0  0  0  0  0  0
   -5.2371   -4.1093    3.1939 C   0  0  0  0  0  0
   -4.6987   -2.2034    1.6269 C   0  0  0  0  0  0
   -5.0743   -0.9433    2.4534 C   0  0  0  0  0  0
   -5.4345    0.2938    1.5852 C   0  0  0  0  0  0
   -4.2942    0.8002    0.7976 C   0  0  0  0  0  0
   -3.1614    1.3088    1.3279 N   0  0  0  0  0  0
   -2.3719    1.6275    0.2913 C   0  0  0  0  0  0
   -1.0831    2.1861    0.2689 C   0  0  0  0  0  0
   -0.4742    2.4188   -0.9842 C   0  0  0  0  0  0
   -1.1506    2.0911   -2.1831 C   0  0  0  0  0  0
   -2.4466    1.5310   -2.1451 C   0  0  0  0  0  0
   -3.0355    1.3105   -0.8895 C   0  0  0  0  0  0
   -4.2236    0.8050   -0.5474 N   0  0  0  0  0  0
   -1.7031   -6.8934    0.9120 C   0  0  0  0  0  0
   -0.5959   -7.7158    0.2151 C   0  0  0  0  0  0
   -1.0633   -8.3088   -1.0604 C   0  0  0  0  0  0
   -0.3844   -9.4501   -1.5516 C   0  0  0  0  0  0
   -0.8586  -10.1362   -2.6804 C   0  0  0  0  0  0
   -0.2278  -11.1883   -3.1252 F   0  0  0  0  0  0
   -2.0286   -9.6966   -3.3153 C   0  0  0  0  0  0
   -2.6880   -8.5465   -2.8497 C   0  0  0  0  0  0
   -2.1881   -7.7837   -1.7622 C   0  0  0  0  0  0
   -2.8727   -6.4915   -1.3547 C   0  0  0  0  0  0
   -3.0563   -5.4428   -2.5487 C   0  0  0  0  0  0
   -1.9087   -5.4255   -3.6029 C   0  0  0  0  0  0
   -4.4500   -5.4791   -3.2448 C   0  0  0  0  0  0
    2.4158   -1.3267   -0.9392 H   0  0  0  0  0  0
    1.0246   -1.0069   -2.0126 H   0  0  0  0  0  0
    1.2274   -0.0897   -0.5143 H   0  0  0  0  0  0
    1.6902   -3.7413   -0.6314 H   0  0  0  0  0  0
    0.3439   -3.4388   -1.7495 H   0  0  0  0  0  0
   -3.8978   -4.3201   -0.0320 H   0  0  0  0  0  0
   -4.1932   -5.6935    1.0077 H   0  0  0  0  0  0
   -2.2704   -3.4088    1.6508 H   0  0  0  0  0  0
   -2.6411   -4.7476    2.7129 H   0  0  0  0  0  0
   -5.8673   -3.4610    3.8032 H   0  0  0  0  0  0
   -5.8719   -4.6350    2.4779 H   0  0  0  0  0  0
   -4.7853   -4.8425    3.8649 H   0  0  0  0  0  0
   -3.9290   -1.9073    0.9087 H   0  0  0  0  0  0
   -5.5646   -2.5376    1.0474 H   0  0  0  0  0  0
   -4.2427   -0.6896    3.1172 H   0  0  0  0  0  0
   -5.9372   -1.1744    3.0817 H   0  0  0  0  0  0
   -5.7794    1.1002    2.2364 H   0  0  0  0  0  0
   -6.2576    0.0348    0.9146 H   0  0  0  0  0  0
   -0.6012    2.4167    1.1398 H   0  0  0  0  0  0
    0.4630    2.8258   -1.0244 H   0  0  0  0  0  0
   -0.6986    2.2616   -3.0843 H   0  0  0  0  0  0
   -2.9443    1.2922   -3.0047 H   0  0  0  0  0  0
   -4.9087    0.4918   -1.1576 H   0  0  0  0  0  0
   -1.2866   -6.4570    1.8196 H   0  0  0  0  0  0
   -2.5060   -7.5701    1.2220 H   0  0  0  0  0  0
    0.2828   -7.0977    0.0189 H   0  0  0  0  0  0
   -0.2961   -8.5068    0.9097 H   0  0  0  0  0  0
    0.4528   -9.8006   -1.0781 H   0  0  0  0  0  0
   -2.4002  -10.2108   -4.1174 H   0  0  0  0  0  0
   -3.5434   -8.2714   -3.3259 H   0  0  0  0  0  0
   -3.8726   -6.8388   -1.0747 H   0  0  0  0  0  0
   -3.0315   -4.4358   -2.1249 H   0  0  0  0  0  0
   -1.9720   -4.5248   -4.2181 H   0  0  0  0  0  0
   -1.9655   -6.2883   -4.2666 H   0  0  0  0  0  0
   -0.9347   -5.4296   -3.1116 H   0  0  0  0  0  0
   -4.5712   -4.6067   -3.8916 H   0  0  0  0  0  0
   -4.5774   -6.3656   -3.8617 H   0  0  0  0  0  0
   -5.2489   -5.4533   -2.5009 H   0  0  0  0  0  0
  1  2  1  0  0  0
  1 37  1  0  0  0
  1 38  1  0  0  0
  1 39  1  0  0  0
  2  3  1  0  0  0
  3  4  1  0  0  0
  3 40  1  0  0  0
  3 41  1  0  0  0
  4  5  2  0  0  0
  4  6  1  0  0  0
  6  7  1  0  0  0
  7  8  1  0  0  0
  7 24  1  0  0  0
  8  9  1  0  0  0
  8 42  1  0  0  0
  8 43  1  0  0  0
  9 10  1  0  0  0
  9 44  1  0  0  0
  9 45  1  0  0  0
 10 11  1  0  0  0
 10 12  1  0  0  0
 11 46  1  0  0  0
 11 47  1  0  0  0
 11 48  1  0  0  0
 12 13  1  0  0  0
 12 49  1  0  0  0
 12 50  1  0  0  0
 13 14  1  0  0  0
 13 51  1  0  0  0
 13 52  1  0  0  0
 14 15  1  0  0  0
 14 53  1  0  0  0
 14 54  1  0  0  0
 15 16  2  0  0  0
 16 17  1  0  0  0
 17 18  1  0  0  0
 18 19  2  0  0  0
 18 55  1  0  0  0
 19 20  1  0  0  0
 19 56  1  0  0  0
 20 21  2  0  0  0
 20 57  1  0  0  0
 21 22  1  0  0  0
 21 58  1  0  0  0
 22 17  2  0  0  0
 22 23  1  0  0  0
 23 15  1  0  0  0
 23 59  1  0  0  0
 24 25  1  0  0  0
 24 60  1  0  0  0
 24 61  1  0  0  0
 25 26  1  0  0  0
 25 62  1  0  0  0
 25 63  1  0  0  0
 26 27  1  0  0  0
 27 28  2  0  0  0
 27 64  1  0  0  0
 28 29  1  0  0  0
 28 30  1  0  0  0
 30 31  2  0  0  0
 30 65  1  0  0  0
 31 32  1  0  0  0
 31 66  1  0  0  0
 32 26  2  0  0  0
 32 33  1  0  0  0
 33  7  1  0  0  0
 33 34  1  0  0  0
 33 67  1  0  0  0
 34 35  1  0  0  0
 34 36  1  0  0  0
 34 68  1  0  0  0
 35 69  1  0  0  0
 35 70  1  0  0  0
 35 71  1  0  0  0
 36 72  1  0  0  0
 36 73  1  0  0  0
 36 74  1  0  0  0
M  END
$$$$
Molecule-081-Anagrelide
  Cerius2 10300711153D 1   1.00000                          
Structure written by Cerius2 SD Exporter
 23 25  0  0  0  0  0  0  0  0999 V2000
   -1.8552    1.9876   -0.1023 C   0  0  0  0  0  0
   -1.6601    2.9923   -0.1130 H   0  0  0  0  0  0
   -3.1850    1.5402   -0.1402 C   0  0  0  0  0  0
   -3.9407    2.2294   -0.1781 H   0  0  0  0  0  0
   -1.0723   -0.3371   -0.0349 C   0  0  0  0  0  0
   -0.7995    1.0606   -0.0499 C   0  0  0  0  0  0
   -2.4211   -0.7843   -0.0735 C   0  0  0  0  0  0
   -3.4755    0.1623   -0.1262 C   0  0  0  0  0  0
    1.5218    0.6940    0.0363 C   0  0  0  0  0  0
    3.5288   -0.1118    0.1193 C   0  0  0  0  0  0
    0.0875   -1.2870    0.0215 C   0  0  0  0  0  0
   -0.0077   -1.9056    0.9176 H   0  0  0  0  0  0
    0.0533   -1.9365   -0.8570 H   0  0  0  0  0  0
    2.6468   -1.2849    0.1094 C   0  0  0  0  0  0
    2.8287   -1.9010   -0.7738 H   0  0  0  0  0  0
    2.7669   -1.8697    1.0239 H   0  0  0  0  0  0
    2.8142    1.0162    0.0751 N   0  0  0  0  0  0
    3.1750    1.9140    0.0719 H   0  0  0  0  0  0
    0.4710    1.5332   -0.0144 N   0  0  0  0  0  0
    1.3736   -0.6430    0.0545 N   0  0  0  0  0  0
    4.7776   -0.1471    0.1629 O   0  0  0  0  0  0
   -2.7747   -2.4494   -0.0567 Cl  0  0  0  0  0  0
   -5.1118   -0.2902   -0.1745 Cl  0  0  0  0  0  0
  1  2  1  0  0  0
  1  3  1  0  0  0
  1  6  2  0  0  0
  3  4  1  0  0  0
  3  8  2  0  0  0
  5  6  1  0  0  0
  5  7  2  0  0  0
  5 11  1  0  0  0
  6 19  1  0  0  0
  7  8  1  0  0  0
  7 22  1  0  0  0
  8 23  1  0  0  0
  9 17  1  0  0  0
  9 19  2  0  0  0
  9 20  1  0  0  0
 10 14  1  0  0  0
 10 17  1  0  0  0
 10 21  2  0  0  0
 11 12  1  0  0  0
 11 13  1  0  0  0
 11 20  1  0  0  0
 14 15  1  0  0  0
 14 16  1  0  0  0
 14 20  1  0  0  0
 17 18  1  0  0  0
M  END
$$$$
Molecule-082-Benserazide
  Cerius2 10300711153D 1   1.00000                          
Structure written by Cerius2 SD Exporter
 33 33  0  0  0  0  0  0  0  0999 V2000
   -2.4930    1.4081    0.2580 C   0  0  0  0  0  0
   -1.9128    2.2224    0.4776 H   0  0  0  0  0  0
   -3.8497    1.4281    0.6211 C   0  0  0  0  0  0
   -4.2382    2.2454    1.0969 H   0  0  0  0  0  0
   -1.9358    0.2867   -0.4010 C   0  0  0  0  0  0
   -4.6720    0.3273    0.3308 C   0  0  0  0  0  0
   -2.7719   -0.8229   -0.6899 C   0  0  0  0  0  0
   -4.1383   -0.8019   -0.3244 C   0  0  0  0  0  0
    2.5592   -0.5863    0.5772 C   0  0  0  0  0  0
    3.9569   -0.5016    0.0727 C   0  0  0  0  0  0
    3.9333   -0.7352   -0.9945 H   0  0  0  0  0  0
   -0.4960    0.3106   -0.7671 C   0  0  0  0  0  0
   -0.2266   -0.5388   -1.4005 H   0  0  0  0  0  0
   -0.2893    1.2208   -1.3385 H   0  0  0  0  0  0
    4.5736    0.9124    0.2375 C   0  0  0  0  0  0
    4.5157    1.2310    1.2816 H   0  0  0  0  0  0
    5.6253    0.8911   -0.0591 H   0  0  0  0  0  0
    1.6432    0.3004    0.1313 N   0  0  0  0  0  0
    1.9672    1.0014   -0.4551 H   0  0  0  0  0  0
    4.8519   -1.4895    0.7078 N   0  0  0  0  0  0
    4.8309   -1.3151    1.7158 H   0  0  0  0  0  0
    4.4327   -2.4118    0.5636 H   0  0  0  0  0  0
    0.3286    0.2724    0.4567 N   0  0  0  0  0  0
    0.1251    1.1208    0.9922 H   0  0  0  0  0  0
   -5.9761    0.3710    0.6894 O   0  0  0  0  0  0
   -6.5527   -0.3976    0.4936 H   0  0  0  0  0  0
   -2.2531   -1.9091   -1.3160 O   0  0  0  0  0  0
   -2.7953   -2.6956   -1.5192 H   0  0  0  0  0  0
   -4.9581   -1.8505   -0.5907 O   0  0  0  0  0  0
   -4.6291   -2.6534   -1.0428 H   0  0  0  0  0  0
    3.9020    1.8663   -0.5892 O   0  0  0  0  0  0
    4.3459    2.7243   -0.4161 H   0  0  0  0  0  0
    2.2271   -1.4767    1.3958 O   0  0  0  0  0  0
  1  2  1  0  0  0
  1  3  1  0  0  0
  1  5  2  0  0  0
  3  4  1  0  0  0
  3  6  2  0  0  0
  5  7  1  0  0  0
  5 12  1  0  0  0
  6  8  1  0  0  0
  6 25  1  0  0  0
  7  8  2  0  0  0
  7 27  1  0  0  0
  8 29  1  0  0  0
  9 10  1  0  0  0
  9 18  1  0  0  0
  9 33  2  0  0  0
 10 11  1  0  0  0
 10 15  1  0  0  0
 10 20  1  0  0  0
 12 13  1  0  0  0
 12 14  1  0  0  0
 12 23  1  0  0  0
 15 16  1  0  0  0
 15 17  1  0  0  0
 15 31  1  0  0  0
 18 19  1  0  0  0
 18 23  1  0  0  0
 20 21  1  0  0  0
 20 22  1  0  0  0
 23 24  1  0  0  0
 25 26  1  0  0  0
 27 28  1  0  0  0
 29 30  1  0  0  0
 31 32  1  0  0  0
M  END
$$$$
Molecule-083-Bromhexine
  Cerius2 10300711153D 1   1.00000                          
Structure written by Cerius2 SD Exporter
 38 39  0  0  0  0  0  0  0  0999 V2000
   -2.5328    0.4477    1.0891 C   0  0  0  0  0  0
   -1.7159    0.9660    1.4218 H   0  0  0  0  0  0
   -4.9456    0.3128    0.8433 C   0  0  0  0  0  0
   -5.8728    0.7166    0.9906 H   0  0  0  0  0  0
   -2.3697   -0.8003    0.4397 C   0  0  0  0  0  0
   -3.5302   -1.4906   -0.0121 C   0  0  0  0  0  0
   -3.8078    1.0020    1.2899 C   0  0  0  0  0  0
   -4.8129   -0.9277    0.1949 C   0  0  0  0  0  0
    4.0809    0.0101    0.5604 C   0  0  0  0  0  0
    4.1476   -1.0755    0.4423 H   0  0  0  0  0  0
    5.0633    0.3664    0.8823 H   0  0  0  0  0  0
    3.0192    0.3482    1.6448 C   0  0  0  0  0  0
    3.0622   -0.4264    2.4161 H   0  0  0  0  0  0
    3.2852    1.2945    2.1242 H   0  0  0  0  0  0
    3.7211    0.6345   -0.8087 C   0  0  0  0  0  0
    3.7859    1.7228   -0.7114 H   0  0  0  0  0  0
    4.4657    0.3313   -1.5500 H   0  0  0  0  0  0
    1.5600    0.4598    1.1045 C   0  0  0  0  0  0
    0.8850    0.1413    1.8986 H   0  0  0  0  0  0
    1.3293    1.5109    0.9053 H   0  0  0  0  0  0
    2.2915    0.2442   -1.3029 C   0  0  0  0  0  0
    1.8405    1.1446   -1.7275 H   0  0  0  0  0  0
    2.3900   -0.4858   -2.1112 H   0  0  0  0  0  0
    1.3265   -0.3498   -0.2133 C   0  0  0  0  0  0
    1.6486   -1.3833   -0.0392 H   0  0  0  0  0  0
   -0.9777   -1.3148    0.2716 C   0  0  0  0  0  0
   -0.5721   -1.4304    1.2775 H   0  0  0  0  0  0
   -0.9487   -2.3195   -0.1545 H   0  0  0  0  0  0
   -0.4771   -0.5494   -2.0299 C   0  0  0  0  0  0
   -0.0261   -1.4607   -2.4297 H   0  0  0  0  0  0
   -1.5552   -0.5998   -2.1949 H   0  0  0  0  0  0
   -0.1252    0.3036   -2.6086 H   0  0  0  0  0  0
   -3.4540   -2.6789   -0.6451 N   0  0  0  0  0  0
   -2.6003   -3.0987   -0.8220 H   0  0  0  0  0  0
   -4.2671   -3.1222   -0.9319 H   0  0  0  0  0  0
   -0.1454   -0.3848   -0.5760 N   0  0  0  0  0  0
   -3.9879    2.6447    2.1452 Br  0  0  0  0  0  0
   -6.3719   -1.7823   -0.3722 Br  0  0  0  0  0  0
  1  2  1  0  0  0
  1  5  1  0  0  0
  1  7  2  0  0  0
  3  4  1  0  0  0
  3  7  1  0  0  0
  3  8  2  0  0  0
  5  6  2  0  0  0
  5 26  1  0  0  0
  6  8  1  0  0  0
  6 33  1  0  0  0
  7 37  1  0  0  0
  8 38  1  0  0  0
  9 10  1  0  0  0
  9 11  1  0  0  0
  9 12  1  0  0  0
  9 15  1  0  0  0
 12 13  1  0  0  0
 12 14  1  0  0  0
 12 18  1  0  0  0
 15 16  1  0  0  0
 15 17  1  0  0  0
 15 21  1  0  0  0
 18 19  1  0  0  0
 18 20  1  0  0  0
 18 24  1  0  0  0
 21 22  1  0  0  0
 21 23  1  0  0  0
 21 24  1  0  0  0
 24 25  1  0  0  0
 24 36  1  0  0  0
 26 27  1  0  0  0
 26 28  1  0  0  0
 26 36  1  0  0  0
 29 30  1  0  0  0
 29 31  1  0  0  0
 29 32  1  0  0  0
 29 36  1  0  0  0
 33 34  1  0  0  0
 33 35  1  0  0  0
M  END
$$$$
Molecule-084-Etodolac
  Cerius2 10300711153D 1   1.00000                          

 42 44  0  0  0  0  0  0  0  0999 V2000
   11.2124   -5.0407    1.9131 C   0  0  0  0  0  0
   10.2043   -5.7052    2.6643 C   0  0  0  0  0  0
   14.0215   -5.8573   -2.8697 C   0  0  0  0  0  0
   13.8330   -4.4013   -2.6995 C   0  0  0  0  0  0
   14.8764   -3.5775   -2.4688 O   0  0  0  0  0  0
   12.7009   -3.8775   -2.7895 O   0  0  0  0  0  0
   11.9289   -5.8285    0.9819 C   0  0  0  0  0  0
   11.6631   -7.1880    0.8025 C   0  0  0  0  0  0
   12.9251   -5.4832    0.1467 N   0  0  0  0  0  0
   13.3152   -6.5632   -0.5587 C   0  0  0  0  0  0
   12.5300   -7.6509   -0.1822 C   0  0  0  0  0  0
   12.6710   -8.9995   -0.7608 C   0  0  0  0  0  0
   13.4788   -8.9351   -2.0846 C   0  0  0  0  0  0
   14.6248   -8.0543   -1.9818 O   0  0  0  0  0  0
   14.3995   -6.6656   -1.5813 C   0  0  0  0  0  0
   15.7644   -6.2001   -0.9665 C   0  0  0  0  0  0
   16.2901   -7.0585    0.2129 C   0  0  0  0  0  0
    9.9368   -7.0817    2.4845 C   0  0  0  0  0  0
   10.6669   -7.8391    1.5476 C   0  0  0  0  0  0
   11.5533   -3.5933    2.0447 C   0  0  0  0  0  0
   10.7550   -2.7486    3.0669 C   0  0  0  0  0  0
    9.6481   -5.1988    3.3546 H   0  0  0  0  0  0
   13.0991   -6.2688   -3.2857 H   0  0  0  0  0  0
   14.7963   -6.0032   -3.6254 H   0  0  0  0  0  0
   13.1885   -9.6347   -0.0385 H   0  0  0  0  0  0
   11.6854   -9.4258   -0.9609 H   0  0  0  0  0  0
   13.8393   -9.9353   -2.3334 H   0  0  0  0  0  0
   12.8293   -8.6103   -2.9010 H   0  0  0  0  0  0
   16.5282   -6.2117   -1.7492 H   0  0  0  0  0  0
   15.6827   -5.1720   -0.6064 H   0  0  0  0  0  0
   17.2440   -6.6585    0.5621 H   0  0  0  0  0  0
   15.5856   -7.0436    1.0463 H   0  0  0  0  0  0
   16.4459   -8.0922   -0.1007 H   0  0  0  0  0  0
    9.2060   -7.5336    3.0393 H   0  0  0  0  0  0
   10.4745   -8.8344    1.4160 H   0  0  0  0  0  0
   12.6106   -3.5175    2.3133 H   0  0  0  0  0  0
   11.4260   -3.1253    1.0645 H   0  0  0  0  0  0
   11.1123   -1.7170    3.0505 H   0  0  0  0  0  0
    9.6924   -2.7477    2.8160 H   0  0  0  0  0  0
   10.8887   -3.1420    4.0767 H   0  0  0  0  0  0
   14.7097   -2.6170   -2.3741 H   0  0  0  0  0  0
   13.3064   -4.5947    0.0674 H   0  0  0  0  0  0
  1  2  2  0  0  0
  1  7  1  0  0  0
  1 20  1  0  0  0
  2 22  1  0  0  0
  3  4  1  0  0  0
  3 15  1  0  0  0
  3 23  1  0  0  0
  3 24  1  0  0  0
  4  5  1  0  0  0
  4  6  2  0  0  0
  5 41  1  0  0  0
  7  8  2  0  0  0
  8 11  1  0  0  0
  8 19  1  0  0  0
  9  7  1  0  0  0
  9 10  1  0  0  0
  9 42  1  0  0  0
 10 11  2  0  0  0
 10 15  1  0  0  0
 11 12  1  0  0  0
 12 13  1  0  0  0
 12 25  1  0  0  0
 12 26  1  0  0  0
 13 14  1  0  0  0
 13 27  1  0  0  0
 13 28  1  0  0  0
 14 15  1  0  0  0
 15 16  1  0  0  0
 16 17  1  0  0  0
 16 29  1  0  0  0
 16 30  1  0  0  0
 17 31  1  0  0  0
 17 32  1  0  0  0
 17 33  1  0  0  0
 18  2  1  0  0  0
 18 19  2  0  0  0
 18 34  1  0  0  0
 19 35  1  0  0  0
 20 21  1  0  0  0
 20 36  1  0  0  0
 20 37  1  0  0  0
 21 38  1  0  0  0
 21 39  1  0  0  0
 21 40  1  0  0  0
M  END
$$$$
Molecule-085_Famciclovir
  Cerius2 10300711153D 1   1.00000                          
Structure written by Cerius2 SD Exporter
 42 43  0  0  0  0  0  0  0  0999 V2000
    4.0283   -1.8230    0.5924 C   0  0  0  0  0  0
    3.0973   -1.0386   -0.0767 C   0  0  0  0  0  0
    5.3037   -1.2940    0.8397 C   0  0  0  0  0  0
    6.0124   -1.8399    1.3302 H   0  0  0  0  0  0
    2.2255   -2.9520    0.4029 C   0  0  0  0  0  0
    1.5569   -3.7226    0.4810 H   0  0  0  0  0  0
    4.6400    0.7177   -0.2478 C   0  0  0  0  0  0
   -0.9418    3.8126    0.9026 C   0  0  0  0  0  0
   -3.7561   -2.2983    0.4260 C   0  0  0  0  0  0
   -2.1113    4.2121    1.7048 C   0  0  0  0  0  0
   -2.2542    3.5037    2.5210 H   0  0  0  0  0  0
   -1.9737    5.2085    2.1286 H   0  0  0  0  0  0
   -3.0010    4.2213    1.0749 H   0  0  0  0  0  0
   -4.5322   -2.8512   -0.6980 C   0  0  0  0  0  0
   -5.0981   -2.0533   -1.1795 H   0  0  0  0  0  0
   -3.8548   -3.3018   -1.4237 H   0  0  0  0  0  0
   -5.2317   -3.6153   -0.3533 H   0  0  0  0  0  0
    0.0034   -0.2673    0.0448 C   0  0  0  0  0  0
    0.7151    0.5352    0.2536 H   0  0  0  0  0  0
   -0.2767   -0.7082    1.0056 H   0  0  0  0  0  0
   -1.2601    0.3620   -0.6313 C   0  0  0  0  0  0
   -0.9502    0.7758   -1.5967 H   0  0  0  0  0  0
    0.7378   -1.3461   -0.7987 C   0  0  0  0  0  0
    0.0811   -2.2115   -0.9196 H   0  0  0  0  0  0
    0.9537   -0.9558   -1.7974 H   0  0  0  0  0  0
   -1.8069    1.5526    0.2120 C   0  0  0  0  0  0
   -2.7229    1.9399   -0.2424 H   0  0  0  0  0  0
   -2.0388    1.2138    1.2258 H   0  0  0  0  0  0
   -2.3876   -0.6742   -0.9198 C   0  0  0  0  0  0
   -3.2434   -0.1682   -1.3753 H   0  0  0  0  0  0
   -2.0318   -1.4169   -1.6369 H   0  0  0  0  0  0
    3.4824   -3.0102    0.8866 N   0  0  0  0  0  0
    3.4009    0.2163   -0.4950 N   0  0  0  0  0  0
    5.5720   -0.0296    0.4084 N   0  0  0  0  0  0
    1.9677   -1.7593   -0.1836 N   0  0  0  0  0  0
    4.9400    1.9564   -0.6508 N   0  0  0  0  0  0
    4.2691    2.4881   -1.1056 H   0  0  0  0  0  0
    5.8232    2.3186   -0.4848 H   0  0  0  0  0  0
    0.0232    4.6014    0.7887 O   0  0  0  0  0  0
   -3.9610   -2.7283    1.5830 O   0  0  0  0  0  0
   -0.8436    2.6173    0.2592 O   0  0  0  0  0  0
   -2.8093   -1.3301    0.2854 O   0  0  0  0  0  0
  1  2  2  0  0  0
  1  3  1  0  0  0
  1 32  1  0  0  0
  2 33  1  0  0  0
  2 35  1  0  0  0
  3  4  1  0  0  0
  3 34  2  0  0  0
  5  6  1  0  0  0
  5 32  2  0  0  0
  5 35  1  0  0  0
  7 33  2  0  0  0
  7 34  1  0  0  0
  7 36  1  0  0  0
  8 10  1  0  0  0
  8 39  2  0  0  0
  8 41  1  0  0  0
  9 14  1  0  0  0
  9 40  2  0  0  0
  9 42  1  0  0  0
 10 11  1  0  0  0
 10 12  1  0  0  0
 10 13  1  0  0  0
 14 15  1  0  0  0
 14 16  1  0  0  0
 14 17  1  0  0  0
 18 19  1  0  0  0
 18 20  1  0  0  0
 18 21  1  0  0  0
 18 23  1  0  0  0
 21 22  1  0  0  0
 21 26  1  0  0  0
 21 29  1  0  0  0
 23 24  1  0  0  0
 23 25  1  0  0  0
 23 35  1  0  0  0
 26 27  1  0  0  0
 26 28  1  0  0  0
 26 41  1  0  0  0
 29 30  1  0  0  0
 29 31  1  0  0  0
 29 42  1  0  0  0
 36 37  1  0  0  0
 36 38  1  0  0  0
M  END
$$$$
Molecule-086-Isocarboxazid
  Cerius2 10300711153D 1   1.00000                          
Structure written by Cerius2 SD Exporter
 30 31  0  0  0  0  0  0  0  0999 V2000
    5.5839   -0.3640    0.3868 C   0  0  0  0  0  0
    6.5761   -0.5045    0.5922 H   0  0  0  0  0  0
    4.9634   -1.1083   -0.6323 C   0  0  0  0  0  0
    5.5051   -1.7909   -1.1675 H   0  0  0  0  0  0
    4.8383    0.5738    1.1228 C   0  0  0  0  0  0
    5.2885    1.1153    1.8644 H   0  0  0  0  0  0
    3.5982   -0.9145   -0.9159 C   0  0  0  0  0  0
    3.1669   -1.4672   -1.6609 H   0  0  0  0  0  0
    3.4734    0.7677    0.8390 C   0  0  0  0  0  0
    2.9470    1.4550    1.3846 H   0  0  0  0  0  0
   -3.6341    0.5006   -0.0220 C   0  0  0  0  0  0
   -3.1936    1.4214   -0.0507 H   0  0  0  0  0  0
    2.8344    0.0264   -0.1839 C   0  0  0  0  0  0
   -3.0143   -0.7239    0.2026 C   0  0  0  0  0  0
   -4.9817    0.2249   -0.2010 C   0  0  0  0  0  0
   -1.6526   -0.9692    0.4382 C   0  0  0  0  0  0
   -6.0679    1.1755   -0.4686 C   0  0  0  0  0  0
   -5.6932    2.1993   -0.5175 H   0  0  0  0  0  0
   -6.5396    0.9244   -1.4191 H   0  0  0  0  0  0
   -6.8106    1.1068    0.3268 H   0  0  0  0  0  0
    1.3949    0.2465   -0.4740 C   0  0  0  0  0  0
    1.2381    1.3052   -0.6992 H   0  0  0  0  0  0
    1.0760   -0.3324   -1.3463 H   0  0  0  0  0  0
   -0.7459    0.0367    0.4601 N   0  0  0  0  0  0
   -1.0565    0.9431    0.3098 H   0  0  0  0  0  0
   -3.9772   -1.6643    0.1529 N   0  0  0  0  0  0
    0.5816   -0.1477    0.6935 N   0  0  0  0  0  0
    0.7466   -1.1472    0.8525 H   0  0  0  0  0  0
   -5.1381   -1.1118   -0.0847 O   0  0  0  0  0  0
   -1.2712   -2.1485    0.6277 O   0  0  0  0  0  0
  1  2  1  0  0  0
  1  3  2  0  0  0
  1  5  1  0  0  0
  3  4  1  0  0  0
  3  7  1  0  0  0
  5  6  1  0  0  0
  5  9  2  0  0  0
  7  8  1  0  0  0
  7 13  2  0  0  0
  9 10  1  0  0  0
  9 13  1  0  0  0
 11 12  1  0  0  0
 11 14  1  0  0  0
 11 15  2  0  0  0
 13 21  1  0  0  0
 14 16  1  0  0  0
 14 26  2  0  0  0
 15 17  1  0  0  0
 15 29  1  0  0  0
 16 24  1  0  0  0
 16 30  2  0  0  0
 17 18  1  0  0  0
 17 19  1  0  0  0
 17 20  1  0  0  0
 21 22  1  0  0  0
 21 23  1  0  0  0
 21 27  1  0  0  0
 24 25  1  0  0  0
 24 27  1  0  0  0
 26 29  1  0  0  0
 27 28  1  0  0  0
M  END
$$$$
Molecule-087-Mianserin
  Cerius2 10300711153D 1   1.00000                          
Structure written by Cerius2 SD Exporter
 40 43  0  0  0  0  0  0  0  0999 V2000
   -1.2902   -4.0052    0.6806 C   0  0  0  0  0  0
   -1.4008   -5.0029    0.8774 H   0  0  0  0  0  0
   -2.0289   -3.0606    1.4036 C   0  0  0  0  0  0
   -2.6746   -3.3703    2.1344 H   0  0  0  0  0  0
    4.0809   -0.9978    0.3298 C   0  0  0  0  0  0
    4.9922   -1.4285    0.5030 H   0  0  0  0  0  0
    3.7630    0.2339    0.9233 C   0  0  0  0  0  0
    4.4406    0.6985    1.5324 H   0  0  0  0  0  0
   -0.3876   -3.5756   -0.3027 C   0  0  0  0  0  0
    0.1603   -4.2828   -0.7993 H   0  0  0  0  0  0
   -1.8879   -1.6920    1.1197 C   0  0  0  0  0  0
   -2.4530   -1.0516    1.6756 H   0  0  0  0  0  0
    3.1421   -1.6428   -0.4933 C   0  0  0  0  0  0
    3.3866   -2.5489   -0.9002 H   0  0  0  0  0  0
    2.5141    0.8288    0.6756 C   0  0  0  0  0  0
    2.2990    1.7253    1.1173 H   0  0  0  0  0  0
   -0.2199   -2.1970   -0.5843 C   0  0  0  0  0  0
   -1.0131   -1.2218    0.1008 C   0  0  0  0  0  0
    1.8755   -1.0597   -0.7401 C   0  0  0  0  0  0
    1.5658    0.2082   -0.1734 C   0  0  0  0  0  0
    0.8523   -1.7890   -1.5366 C   0  0  0  0  0  0
    1.2947   -2.6529   -2.0414 H   0  0  0  0  0  0
    0.4500   -1.1522   -2.3279 H   0  0  0  0  0  0
   -0.9418    0.2414   -0.3034 C   0  0  0  0  0  0
   -1.8077    1.2372    0.5429 C   0  0  0  0  0  0
   -2.8480    0.9005    0.5252 H   0  0  0  0  0  0
   -1.4523    1.2297    1.5785 H   0  0  0  0  0  0
   -0.3922    3.1506   -0.1691 C   0  0  0  0  0  0
    0.0989    3.2727    0.8016 H   0  0  0  0  0  0
   -0.4130    4.1240   -0.6673 H   0  0  0  0  0  0
    0.4296    2.1751   -1.0410 C   0  0  0  0  0  0
   -0.0030    2.1453   -2.0455 H   0  0  0  0  0  0
    1.4446    2.5706   -1.1516 H   0  0  0  0  0  0
   -2.6593    3.5739    0.7577 C   0  0  0  0  0  0
   -3.6853    3.2010    0.7784 H   0  0  0  0  0  0
   -2.3122    3.7018    1.7861 H   0  0  0  0  0  0
   -2.6780    4.5507    0.2699 H   0  0  0  0  0  0
    0.3873    0.8414   -0.4656 N   0  0  0  0  0  0
   -1.7811    2.6344    0.0038 N   0  0  0  0  0  0
   -1.4007    0.2449   -1.2985 H   0  0  0  0  0  0
  1  2  1  0  0  0
  1  3  1  0  0  0
  1  9  2  0  0  0
  3  4  1  0  0  0
  3 11  2  0  0  0
  5  6  1  0  0  0
  5  7  2  0  0  0
  5 13  1  0  0  0
  7  8  1  0  0  0
  7 15  1  0  0  0
  9 10  1  0  0  0
  9 17  1  0  0  0
 11 12  1  0  0  0
 11 18  1  0  0  0
 13 14  1  0  0  0
 13 19  2  0  0  0
 15 16  1  0  0  0
 15 20  2  0  0  0
 17 18  2  0  0  0
 17 21  1  0  0  0
 18 24  1  0  0  0
 19 20  1  0  0  0
 19 21  1  0  0  0
 20 38  1  0  0  0
 21 22  1  0  0  0
 21 23  1  0  0  0
 24 25  1  0  0  0
 24 38  1  0  0  0
 25 26  1  0  0  0
 25 27  1  0  0  0
 25 39  1  0  0  0
 28 29  1  0  0  0
 28 30  1  0  0  0
 28 31  1  0  0  0
 28 39  1  0  0  0
 31 32  1  0  0  0
 31 33  1  0  0  0
 31 38  1  0  0  0
 34 35  1  0  0  0
 34 36  1  0  0  0
 34 37  1  0  0  0
 34 39  1  0  0  0
 40 24  1  0  0  0
M  END
$$$$
Molecule-088-Moxisylyte
  Cerius2 10300711153D 1   1.00000                          
Structure written by Cerius2 SD Exporter
 45 45  0  0  0  0  0  0  0  0999 V2000
   -2.4647    0.8865   -0.5971 C   0  0  0  0  0  0
   -3.0317    1.6217   -1.0120 H   0  0  0  0  0  0
   -0.9135   -1.1327    0.5411 C   0  0  0  0  0  0
   -0.3443   -1.8711    0.9571 H   0  0  0  0  0  0
   -2.3191   -1.2588    0.5509 C   0  0  0  0  0  0
   -1.0545    1.0247   -0.6131 C   0  0  0  0  0  0
   -3.1083   -0.2344   -0.0264 C   0  0  0  0  0  0
   -0.2754   -0.0101   -0.0299 C   0  0  0  0  0  0
   -5.5314    0.3235   -0.4209 C   0  0  0  0  0  0
   -2.9565   -2.4555    1.1616 C   0  0  0  0  0  0
   -3.6137   -2.1463    1.9764 H   0  0  0  0  0  0
   -3.5486   -2.9803    0.4095 H   0  0  0  0  0  0
   -2.2268   -3.1596    1.5666 H   0  0  0  0  0  0
   -6.8671   -0.2345   -0.1784 C   0  0  0  0  0  0
   -6.9494   -1.2023   -0.6741 H   0  0  0  0  0  0
   -7.0129   -0.3689    0.8940 H   0  0  0  0  0  0
   -7.6487    0.4251   -0.5606 H   0  0  0  0  0  0
    0.4155    1.9169   -2.4925 C   0  0  0  0  0  0
    0.7079    2.8363   -3.0046 H   0  0  0  0  0  0
    1.3239    1.3772   -2.2239 H   0  0  0  0  0  0
   -0.1580    1.3067   -3.1937 H   0  0  0  0  0  0
    0.3260    3.1291   -0.2163 C   0  0  0  0  0  0
    0.6136    4.0779   -0.6746 H   0  0  0  0  0  0
   -0.3079    3.3483    0.6458 H   0  0  0  0  0  0
    1.2328    2.6360    0.1350 H   0  0  0  0  0  0
   -0.4444    2.2516   -1.2419 C   0  0  0  0  0  0
   -1.2440    2.8995   -1.6184 H   0  0  0  0  0  0
    3.4857   -0.1734    0.2056 C   0  0  0  0  0  0
    3.5057    0.0767   -0.8597 H   0  0  0  0  0  0
    3.5886    0.7632    0.7619 H   0  0  0  0  0  0
    2.0908   -0.7788    0.4797 C   0  0  0  0  0  0
    2.0150   -1.7510   -0.0135 H   0  0  0  0  0  0
    1.9376   -0.9033    1.5530 H   0  0  0  0  0  0
    5.8903   -0.7155   -0.1468 C   0  0  0  0  0  0
    5.7505   -0.6593   -1.2284 H   0  0  0  0  0  0
    6.2441    0.2547    0.2115 H   0  0  0  0  0  0
    6.6674   -1.4609    0.0357 H   0  0  0  0  0  0
    4.8149   -1.3550    1.9851 C   0  0  0  0  0  0
    5.0481   -0.4281    2.5151 H   0  0  0  0  0  0
    3.9240   -1.7980    2.4296 H   0  0  0  0  0  0
    5.6307   -2.0627    2.1479 H   0  0  0  0  0  0
    4.6156   -1.1073    0.5252 N   0  0  0  0  0  0
   -5.4276    1.4268   -1.0030 O   0  0  0  0  0  0
   -4.4645   -0.4047    0.0093 O   0  0  0  0  0  0
    1.0836    0.1036   -0.0340 O   0  0  0  0  0  0
  1  2  1  0  0  0
  1  6  2  0  0  0
  1  7  1  0  0  0
  3  4  1  0  0  0
  3  5  1  0  0  0
  3  8  2  0  0  0
  5  7  2  0  0  0
  5 10  1  0  0  0
  6  8  1  0  0  0
  6 26  1  0  0  0
  7 44  1  0  0  0
  8 45  1  0  0  0
  9 14  1  0  0  0
  9 43  2  0  0  0
  9 44  1  0  0  0
 10 11  1  0  0  0
 10 12  1  0  0  0
 10 13  1  0  0  0
 14 15  1  0  0  0
 14 16  1  0  0  0
 14 17  1  0  0  0
 18 19  1  0  0  0
 18 20  1  0  0  0
 18 21  1  0  0  0
 18 26  1  0  0  0
 22 23  1  0  0  0
 22 24  1  0  0  0
 22 25  1  0  0  0
 22 26  1  0  0  0
 26 27  1  0  0  0
 28 29  1  0  0  0
 28 30  1  0  0  0
 28 31  1  0  0  0
 28 42  1  0  0  0
 31 32  1  0  0  0
 31 33  1  0  0  0
 31 45  1  0  0  0
 34 35  1  0  0  0
 34 36  1  0  0  0
 34 37  1  0  0  0
 34 42  1  0  0  0
 38 39  1  0  0  0
 38 40  1  0  0  0
 38 41  1  0  0  0
 38 42  1  0  0  0
M  END
$$$$
Molecule-089-Pimozide
  Cerius2 10300711153D 1   1.00000                          
Structure written by Cerius2 SD Exporter
 60 64  0  0  0  0  0  0  0  0999 V2000
    6.7005   -1.3178    2.2381 C   0  0  0  0  0  0
    6.7290   -1.5474    3.2343 H   0  0  0  0  0  0
    7.8875   -1.3663    1.4738 C   0  0  0  0  0  0
    8.7697   -1.6295    1.9192 H   0  0  0  0  0  0
   -5.3745   -1.7790   -0.0717 C   0  0  0  0  0  0
   -5.5000   -1.7943    0.9436 H   0  0  0  0  0  0
   -4.2549   -0.9876   -2.0759 C   0  0  0  0  0  0
   -3.5448   -0.4276   -2.5494 H   0  0  0  0  0  0
   -4.6914    1.8767    1.2356 C   0  0  0  0  0  0
   -4.8880    1.3153    2.0680 H   0  0  0  0  0  0
   -3.7302    2.1561   -0.9765 C   0  0  0  0  0  0
   -3.2070    1.8099   -1.7812 H   0  0  0  0  0  0
   -6.2226   -2.5788   -0.8593 C   0  0  0  0  0  0
   -6.9369   -3.1584   -0.4129 H   0  0  0  0  0  0
   -5.1039   -1.7840   -2.8661 C   0  0  0  0  0  0
   -5.0028   -1.7843   -3.8839 H   0  0  0  0  0  0
   -5.1657    3.2011    1.1986 C   0  0  0  0  0  0
   -5.6880    3.5791    1.9926 H   0  0  0  0  0  0
   -4.2044    3.4802   -1.0167 C   0  0  0  0  0  0
   -4.0246    4.0624   -1.8382 H   0  0  0  0  0  0
    5.4754   -0.9562    1.6366 C   0  0  0  0  0  0
    4.6264   -0.9314    2.2003 H   0  0  0  0  0  0
    7.8626   -1.0547    0.0990 C   0  0  0  0  0  0
    8.7144   -1.0877   -0.4644 H   0  0  0  0  0  0
   -4.3749   -0.9636   -0.6624 C   0  0  0  0  0  0
   -3.9681    1.3239    0.1473 C   0  0  0  0  0  0
   -6.0899   -2.5790   -2.2581 C   0  0  0  0  0  0
   -4.9256    4.0029    0.0699 C   0  0  0  0  0  0
    6.6334   -0.6972   -0.4775 C   0  0  0  0  0  0
    5.4499   -0.6405    0.2609 C   0  0  0  0  0  0
    5.0319   -0.1055   -1.7969 C   0  0  0  0  0  0
   -1.9690   -0.3034   -0.0781 C   0  0  0  0  0  0
   -1.7624   -1.3760   -0.0662 H   0  0  0  0  0  0
   -1.7069    0.0620   -1.0730 H   0  0  0  0  0  0
    2.8023    1.1216    0.6939 C   0  0  0  0  0  0
    3.2884    2.0259    0.3167 H   0  0  0  0  0  0
    3.2483    0.8908    1.6619 H   0  0  0  0  0  0
    2.3139   -1.3617    0.1591 C   0  0  0  0  0  0
    2.9698   -1.9930    0.7600 H   0  0  0  0  0  0
    2.0613   -1.9369   -0.7368 H   0  0  0  0  0  0
   -3.4958   -0.1019    0.1992 C   0  0  0  0  0  0
   -3.6120   -0.4542    1.2305 H   0  0  0  0  0  0
    3.0461   -0.0566   -0.2922 C   0  0  0  0  0  0
    2.5453    0.2525   -1.2187 H   0  0  0  0  0  0
   -1.0362    0.3936    0.9503 C   0  0  0  0  0  0
   -1.2917    1.4572    0.9561 H   0  0  0  0  0  0
   -1.2256    0.0074    1.9562 H   0  0  0  0  0  0
    1.2804    1.3886    0.8986 C   0  0  0  0  0  0
    1.1162    1.7188    1.9294 H   0  0  0  0  0  0
    0.9836    2.2078    0.2375 H   0  0  0  0  0  0
    1.0152   -1.0957    0.9738 C   0  0  0  0  0  0
    0.3295   -1.9286    0.8040 H   0  0  0  0  0  0
    1.2476   -1.0821    2.0438 H   0  0  0  0  0  0
   -6.8782   -3.3157   -2.9897 F   0  0  0  0  0  0
   -5.3705    5.2282    0.0308 F   0  0  0  0  0  0
    6.3434   -0.3645   -1.7355 N   0  0  0  0  0  0
    6.9633   -0.3161   -2.4776 H   0  0  0  0  0  0
    4.4517   -0.2651   -0.5797 N   0  0  0  0  0  0
    0.4036    0.2121    0.5836 N   0  0  0  0  0  0
    4.4675    0.2359   -2.8599 O   0  0  0  0  0  0
  1  2  1  0  0  0
  1  3  1  0  0  0
  1 21  2  0  0  0
  3  4  1  0  0  0
  3 23  2  0  0  0
  5  6  1  0  0  0
  5 13  1  0  0  0
  5 25  2  0  0  0
  7  8  1  0  0  0
  7 15  2  0  0  0
  7 25  1  0  0  0
  9 10  1  0  0  0
  9 17  1  0  0  0
  9 26  2  0  0  0
 11 12  1  0  0  0
 11 19  2  0  0  0
 11 26  1  0  0  0
 13 14  1  0  0  0
 13 27  2  0  0  0
 15 16  1  0  0  0
 15 27  1  0  0  0
 17 18  1  0  0  0
 17 28  2  0  0  0
 19 20  1  0  0  0
 19 28  1  0  0  0
 21 22  1  0  0  0
 21 30  1  0  0  0
 23 24  1  0  0  0
 23 29  1  0  0  0
 25 41  1  0  0  0
 26 41  1  0  0  0
 27 54  1  0  0  0
 28 55  1  0  0  0
 29 30  2  0  0  0
 29 56  1  0  0  0
 30 58  1  0  0  0
 31 56  1  0  0  0
 31 58  1  0  0  0
 31 60  2  0  0  0
 32 33  1  0  0  0
 32 34  1  0  0  0
 32 41  1  0  0  0
 32 45  1  0  0  0
 35 36  1  0  0  0
 35 37  1  0  0  0
 35 43  1  0  0  0
 35 48  1  0  0  0
 38 39  1  0  0  0
 38 40  1  0  0  0
 38 43  1  0  0  0
 38 51  1  0  0  0
 41 42  1  0  0  0
 43 44  1  0  0  0
 43 58  1  0  0  0
 45 46  1  0  0  0
 45 47  1  0  0  0
 45 59  1  0  0  0
 48 49  1  0  0  0
 48 50  1  0  0  0
 48 59  1  0  0  0
 51 52  1  0  0  0
 51 53  1  0  0  0
 51 59  1  0  0  0
 56 57  1  0  0  0
M  END
$$$$
Molecule-090_Recainam
  Cerius2 10300711153D 1   1.00000                          
Structure written by Cerius2 SD Exporter
 44 44  0  0  0  0  0  0  0  0999 V2000
   -6.5114    0.3397    0.2222 C   0  0  0  0  0  0
   -7.5252    0.4691    0.2679 H   0  0  0  0  0  0
   -5.9347   -0.8525    0.6835 C   0  0  0  0  0  0
   -6.5488   -1.5767    1.0668 H   0  0  0  0  0  0
   -5.6965    1.3574   -0.2945 C   0  0  0  0  0  0
   -6.1400    2.2221   -0.6146 H   0  0  0  0  0  0
   -4.5355   -1.0500    0.6352 C   0  0  0  0  0  0
   -4.2949    1.1911   -0.3769 C   0  0  0  0  0  0
   -3.7142   -0.0309    0.0677 C   0  0  0  0  0  0
   -1.7417   -1.0729   -0.8511 C   0  0  0  0  0  0
   -4.0102   -2.3174    1.2113 C   0  0  0  0  0  0
   -4.3511   -3.1621    0.6099 H   0  0  0  0  0  0
   -2.9227   -2.3470    1.2585 H   0  0  0  0  0  0
   -4.3787   -2.4412    2.2318 H   0  0  0  0  0  0
   -3.4608    2.2878   -0.9401 C   0  0  0  0  0  0
   -4.0528    3.1555   -1.2387 H   0  0  0  0  0  0
   -2.7350    2.6181   -0.1949 H   0  0  0  0  0  0
   -2.9257    1.9281   -1.8209 H   0  0  0  0  0  0
    5.8037    1.7745    0.0385 C   0  0  0  0  0  0
    4.9567    2.4241    0.2616 H   0  0  0  0  0  0
    6.6830    2.1874    0.5371 H   0  0  0  0  0  0
    5.9762    1.7815   -1.0397 H   0  0  0  0  0  0
    6.7671   -0.5751    0.3379 C   0  0  0  0  0  0
    7.0283   -0.6455   -0.7203 H   0  0  0  0  0  0
    7.6236   -0.1766    0.8856 H   0  0  0  0  0  0
    6.5601   -1.5797    0.7130 H   0  0  0  0  0  0
    1.9812   -0.7079   -0.5596 C   0  0  0  0  0  0
    2.1355   -0.5969   -1.6368 H   0  0  0  0  0  0
    2.1356   -1.7595   -0.3004 H   0  0  0  0  0  0
    5.5282    0.3316    0.5367 C   0  0  0  0  0  0
    5.3167    0.3646    1.6109 H   0  0  0  0  0  0
    0.5241   -0.3131   -0.2153 C   0  0  0  0  0  0
    0.3608   -0.4322    0.8600 H   0  0  0  0  0  0
    0.3583    0.7342   -0.4849 H   0  0  0  0  0  0
    3.0298    0.1500    0.1883 C   0  0  0  0  0  0
    2.8960    1.2002   -0.0815 H   0  0  0  0  0  0
    2.8833    0.0391    1.2664 H   0  0  0  0  0  0
   -2.3704   -0.1751   -0.0573 N   0  0  0  0  0  0
   -1.8124    0.4558    0.4181 H   0  0  0  0  0  0
   -0.3973   -1.1386   -0.9298 N   0  0  0  0  0  0
   -0.0354   -1.8099   -1.5288 H   0  0  0  0  0  0
    4.3917   -0.3012   -0.1800 N   0  0  0  0  0  0
    4.5222   -0.1344   -1.1810 H   0  0  0  0  0  0
   -2.3728   -1.8848   -1.5643 O   0  0  0  0  0  0
  1  2  1  0  0  0
  1  3  2  0  0  0
  1  5  1  0  0  0
  3  4  1  0  0  0
  3  7  1  0  0  0
  5  6  1  0  0  0
  5  8  2  0  0  0
  7  9  2  0  0  0
  7 11  1  0  0  0
  8  9  1  0  0  0
  8 15  1  0  0  0
  9 38  1  0  0  0
 10 38  1  0  0  0
 10 40  1  0  0  0
 10 44  2  0  0  0
 11 12  1  0  0  0
 11 13  1  0  0  0
 11 14  1  0  0  0
 15 16  1  0  0  0
 15 17  1  0  0  0
 15 18  1  0  0  0
 19 20  1  0  0  0
 19 21  1  0  0  0
 19 22  1  0  0  0
 19 30  1  0  0  0
 23 24  1  0  0  0
 23 25  1  0  0  0
 23 26  1  0  0  0
 23 30  1  0  0  0
 27 28  1  0  0  0
 27 29  1  0  0  0
 27 32  1  0  0  0
 27 35  1  0  0  0
 30 31  1  0  0  0
 30 42  1  0  0  0
 32 33  1  0  0  0
 32 34  1  0  0  0
 32 40  1  0  0  0
 35 36  1  0  0  0
 35 37  1  0  0  0
 35 42  1  0  0  0
 38 39  1  0  0  0
 40 41  1  0  0  0
 42 43  1  0  0  0
M  END
$$$$
Molecule-091_Ceftizoxime
  Cerius2 10300711153D 1   1.00000                          
Structure written by Cerius2 SD Exporter
 38 40  0  0  0  0  0  0  0  0999 V2000
    2.8793   -0.1952    0.6515 C   0  0  0  0  0  0
    4.0748   -0.5160    1.3085 C   0  0  0  0  0  0
    4.8448    0.1424    1.4393 H   0  0  0  0  0  0
    2.6036   -2.3478    1.2444 C   0  0  0  0  0  0
   -4.0559   -1.9648   -0.1800 C   0  0  0  0  0  0
   -4.9244   -2.4112    0.1296 H   0  0  0  0  0  0
   -3.8967   -0.5661   -0.0168 C   0  0  0  0  0  0
    2.5626    1.0616    0.0725 C   0  0  0  0  0  0
    1.3256    1.3529   -0.5675 C   0  0  0  0  0  0
   -2.0448    1.0998   -0.3934 C   0  0  0  0  0  0
   -4.8752    0.1917    0.6697 C   0  0  0  0  0  0
   -0.9618    0.6713   -1.2828 C   0  0  0  0  0  0
   -0.9180    1.2828   -2.1889 H   0  0  0  0  0  0
   -1.8426   -0.6033   -1.4624 C   0  0  0  0  0  0
   -2.2635   -0.6901   -2.4709 H   0  0  0  0  0  0
   -3.0289   -2.8607   -0.7772 C   0  0  0  0  0  0
   -3.0032   -3.7915   -0.2078 H   0  0  0  0  0  0
   -3.3280   -3.1015   -1.7990 H   0  0  0  0  0  0
    4.6600    4.0803   -0.0886 C   0  0  0  0  0  0
    4.8690    4.2049    0.9751 H   0  0  0  0  0  0
    5.5358    3.6586   -0.5843 H   0  0  0  0  0  0
    4.4372    5.0539   -0.5250 H   0  0  0  0  0  0
    0.3049    0.4626   -0.6441 N   0  0  0  0  0  0
    0.4410   -0.3885   -0.2155 H   0  0  0  0  0  0
    2.0775   -1.2740    0.6465 N   0  0  0  0  0  0
    3.5459    1.9935    0.1662 N   0  0  0  0  0  0
    1.9406   -3.5072    1.3122 N   0  0  0  0  0  0
    1.0556   -3.5763    0.9222 H   0  0  0  0  0  0
    2.3425   -4.2738    1.7486 H   0  0  0  0  0  0
   -2.7586   -0.0257   -0.5405 N   0  0  0  0  0  0
   -4.8100    1.5322    0.8041 O   0  0  0  0  0  0
   -5.5228    1.9970    1.2867 H   0  0  0  0  0  0
    1.1311    2.4732   -1.0968 O   0  0  0  0  0  0
   -2.1844    2.1355    0.2936 O   0  0  0  0  0  0
   -5.8923   -0.3276    1.1850 O   0  0  0  0  0  0
    3.5378    3.2229   -0.2681 O   0  0  0  0  0  0
    4.1851   -2.1360    1.9068 S   0  0  0  0  0  0
   -1.3334   -2.2056   -0.7954 S   0  0  0  0  0  0
  1  2  2  0  0  0
  1  8  1  0  0  0
  1 25  1  0  0  0
  2  3  1  0  0  0
  2 37  1  0  0  0
  4 25  2  0  0  0
  4 27  1  0  0  0
  4 37  1  0  0  0
  5  6  1  0  0  0
  5  7  2  0  0  0
  5 16  1  0  0  0
  7 11  1  0  0  0
  7 30  1  0  0  0
  8  9  1  0  0  0
  8 26  2  0  0  0
  9 23  1  0  0  0
  9 33  2  0  0  0
 10 12  1  0  0  0
 10 30  1  0  0  0
 10 34  2  0  0  0
 11 31  1  0  0  0
 11 35  2  0  0  0
 12 13  1  0  0  0
 12 14  1  0  0  0
 12 23  1  0  0  0
 14 15  1  0  0  0
 14 30  1  0  0  0
 14 38  1  0  0  0
 16 17  1  0  0  0
 16 18  1  0  0  0
 16 38  1  0  0  0
 19 20  1  0  0  0
 19 21  1  0  0  0
 19 22  1  0  0  0
 19 36  1  0  0  0
 23 24  1  0  0  0
 26 36  1  0  0  0
 27 28  1  0  0  0
 27 29  1  0  0  0
 31 32  1  0  0  0
M  END
$$$$
Molecule-092_Cycloserine
  Cerius2 10300711153D 1   1.00000                          
Structure written by Cerius2 SD Exporter
 13 13  0  0  0  0  0  0  0  0999 V2000
   -0.8951    0.6330   -0.0267 C   0  0  0  0  0  0
   -0.1763   -0.5747    0.3851 C   0  0  0  0  0  0
   -0.5215   -0.8854    1.3739 H   0  0  0  0  0  0
    1.2791   -0.0474    0.4457 C   0  0  0  0  0  0
    1.6919   -0.1297    1.4537 H   0  0  0  0  0  0
    1.9356   -0.5635   -0.2586 H   0  0  0  0  0  0
   -0.0600    1.6624   -0.1780 N   0  0  0  0  0  0
   -0.3452    2.5504   -0.4452 H   0  0  0  0  0  0
   -0.3441   -1.6844   -0.5701 N   0  0  0  0  0  0
   -1.3437   -1.9001   -0.6090 H   0  0  0  0  0  0
   -0.0832   -1.3338   -1.4952 H   0  0  0  0  0  0
   -2.1304    0.7141   -0.2059 O   0  0  0  0  0  0
    1.1702    1.3290    0.0786 O   0  0  0  0  0  0
  1  2  1  0  0  0
  1  7  1  0  0  0
  1 12  2  0  0  0
  2  3  1  0  0  0
  2  4  1  0  0  0
  2  9  1  0  0  0
  4  5  1  0  0  0
  4  6  1  0  0  0
  4 13  1  0  0  0
  7  8  1  0  0  0
  7 13  1  0  0  0
  9 10  1  0  0  0
  9 11  1  0  0  0
M  END
$$$$
Molecule-093-Benzbromarone
  Cerius2 10300711153D 1   1.00000                          
Structure written by Cerius2 SD Exporter
 34 36  0  0  0  0  0  0  0  0999 V2000
   -1.1415   -0.8159   -0.4788 C   0  0  0  0  0  0
   -2.4564   -1.0538   -0.0830 C   0  0  0  0  0  0
   -0.4026   -1.8158   -1.1442 C   0  0  0  0  0  0
    0.5556   -1.6473   -1.4557 H   0  0  0  0  0  0
   -3.0792   -2.2907   -0.3130 C   0  0  0  0  0  0
   -4.0428   -2.4469   -0.0126 H   0  0  0  0  0  0
   -1.0153   -3.0653   -1.3816 C   0  0  0  0  0  0
   -0.4932   -3.8038   -1.8591 H   0  0  0  0  0  0
   -2.3457   -3.3027   -0.9674 C   0  0  0  0  0  0
   -2.7805   -4.2113   -1.1445 H   0  0  0  0  0  0
    2.8054    1.0579   -0.7525 C   0  0  0  0  0  0
    2.7182    1.7614   -1.4908 H   0  0  0  0  0  0
    1.8467   -0.3453    0.9799 C   0  0  0  0  0  0
    1.0541   -0.6723    1.5378 H   0  0  0  0  0  0
   -0.8315    0.4939   -0.1068 C   0  0  0  0  0  0
    1.6610    0.6275   -0.0349 C   0  0  0  0  0  0
    4.2423   -0.4424    0.5268 C   0  0  0  0  0  0
    4.0820    0.5311   -0.4794 C   0  0  0  0  0  0
    3.1192   -0.8799    1.2560 C   0  0  0  0  0  0
   -1.9961    0.9985    0.4982 C   0  0  0  0  0  0
    0.3846    1.1711   -0.3188 C   0  0  0  0  0  0
   -3.2381    3.1608    0.2731 C   0  0  0  0  0  0
   -4.2015    2.6482    0.2247 H   0  0  0  0  0  0
   -3.3867    4.1337    0.7454 H   0  0  0  0  0  0
   -2.8685    3.3201   -0.7424 H   0  0  0  0  0  0
   -2.2232    2.3340    1.0917 C   0  0  0  0  0  0
   -1.2905    2.8949    1.1688 H   0  0  0  0  0  0
   -2.6067    2.1957    2.1049 H   0  0  0  0  0  0
    5.4649   -0.9582    0.7988 O   0  0  0  0  0  0
    6.2558   -0.6627    0.3001 H   0  0  0  0  0  0
   -2.9654    0.0478    0.5061 O   0  0  0  0  0  0
    0.3053    2.3279   -0.7968 O   0  0  0  0  0  0
    5.5405    1.1392   -1.4663 Br  0  0  0  0  0  0
    3.2895   -2.1638    2.5951 Br  0  0  0  0  0  0
  1  2  2  0  0  0
  1  3  1  0  0  0
  1 15  1  0  0  0
  2  5  1  0  0  0
  2 31  1  0  0  0
  3  4  1  0  0  0
  3  7  2  0  0  0
  5  6  1  0  0  0
  5  9  2  0  0  0
  7  8  1  0  0  0
  7  9  1  0  0  0
  9 10  1  0  0  0
 11 12  1  0  0  0
 11 16  1  0  0  0
 11 18  2  0  0  0
 13 14  1  0  0  0
 13 16  2  0  0  0
 13 19  1  0  0  0
 15 20  2  0  0  0
 15 21  1  0  0  0
 16 21  1  0  0  0
 17 18  1  0  0  0
 17 19  2  0  0  0
 17 29  1  0  0  0
 18 33  1  0  0  0
 19 34  1  0  0  0
 20 26  1  0  0  0
 20 31  1  0  0  0
 21 32  2  0  0  0
 22 23  1  0  0  0
 22 24  1  0  0  0
 22 25  1  0  0  0
 22 26  1  0  0  0
 26 27  1  0  0  0
 26 28  1  0  0  0
 29 30  1  0  0  0
M  END
$$$$
Molecule-094-Quetiapine
  Cerius2 10300711153D 1   1.00000                          
Structure written by Cerius2 SD Exporter
 52 55  0  0  0  0  0  0  0  0999 V2000
   -2.9944    3.1693    1.4672 C   0  0  0  0  0  0
   -2.5619    3.7900    2.1556 H   0  0  0  0  0  0
   -5.3541   -3.2451    1.1875 C   0  0  0  0  0  0
   -5.4429   -4.0782    1.7744 H   0  0  0  0  0  0
   -4.2801    3.4508    0.9787 C   0  0  0  0  0  0
   -4.7817    4.2797    1.3065 H   0  0  0  0  0  0
   -6.5061   -2.5809    0.7318 C   0  0  0  0  0  0
   -7.4325   -2.9291    0.9900 H   0  0  0  0  0  0
   -2.3042    2.0329    1.0102 C   0  0  0  0  0  0
   -1.3733    1.8416    1.3912 H   0  0  0  0  0  0
   -4.0800   -2.7632    0.8359 C   0  0  0  0  0  0
   -3.2487   -3.2563    1.1723 H   0  0  0  0  0  0
   -4.8793    2.5883    0.0452 C   0  0  0  0  0  0
   -5.8212    2.8002   -0.2933 H   0  0  0  0  0  0
   -6.3846   -1.4434   -0.0864 C   0  0  0  0  0  0
   -7.2317   -0.9789   -0.4232 H   0  0  0  0  0  0
   -2.8778    1.1668    0.0459 C   0  0  0  0  0  0
   -3.9458   -1.6079    0.0377 C   0  0  0  0  0  0
   -4.1937    1.4431   -0.4121 C   0  0  0  0  0  0
   -5.1103   -0.9562   -0.4459 C   0  0  0  0  0  0
   -2.1379    0.0375   -0.3888 C   0  0  0  0  0  0
    1.1341    1.6038   -0.8185 C   0  0  0  0  0  0
    1.6477    2.3087   -1.4805 H   0  0  0  0  0  0
    1.0182    2.0886    0.1536 H   0  0  0  0  0  0
    1.4617   -0.8190   -1.3681 C   0  0  0  0  0  0
    2.0230   -1.7213   -1.1200 H   0  0  0  0  0  0
    1.5776   -0.6396   -2.4411 H   0  0  0  0  0  0
   -0.2791    1.3502   -1.4151 C   0  0  0  0  0  0
   -0.8918    2.2410   -1.2697 H   0  0  0  0  0  0
   -0.1812    1.2383   -2.4993 H   0  0  0  0  0  0
   -0.0371   -1.0767   -1.0352 C   0  0  0  0  0  0
   -0.4595   -1.7274   -1.8064 H   0  0  0  0  0  0
   -0.0610   -1.6212   -0.0854 H   0  0  0  0  0  0
    3.4366    0.6046   -0.6457 C   0  0  0  0  0  0
    3.6612    1.5723   -0.1858 H   0  0  0  0  0  0
    3.7801    0.6474   -1.6835 H   0  0  0  0  0  0
    7.9546   -0.3144    0.8304 C   0  0  0  0  0  0
    8.2797   -0.2070   -0.2069 H   0  0  0  0  0  0
    7.9599    0.6691    1.3057 H   0  0  0  0  0  0
    4.2694   -0.4449    0.1262 C   0  0  0  0  0  0
    3.8669   -0.5370    1.1394 H   0  0  0  0  0  0
    4.2014   -1.4125   -0.3759 H   0  0  0  0  0  0
    6.5327   -0.9011    0.8700 C   0  0  0  0  0  0
    6.5460   -1.8887    0.3996 H   0  0  0  0  0  0
    6.2247   -1.0074    1.9144 H   0  0  0  0  0  0
   -2.6884   -1.2023   -0.2624 N   0  0  0  0  0  0
   -0.8599    0.1204   -0.9040 N   0  0  0  0  0  0
    1.9572    0.3641   -0.5994 N   0  0  0  0  0  0
    8.8580   -1.1747    1.5195 O   0  0  0  0  0  0
    9.7326   -0.7351    1.4540 H   0  0  0  0  0  0
    5.6450   -0.0124    0.1642 O   0  0  0  0  0  0
   -5.0234    0.4030   -1.5351 S   0  0  0  0  0  0
  1  2  1  0  0  0
  1  5  2  0  0  0
  1  9  1  0  0  0
  3  4  1  0  0  0
  3  7  2  0  0  0
  3 11  1  0  0  0
  5  6  1  0  0  0
  5 13  1  0  0  0
  7  8  1  0  0  0
  7 15  1  0  0  0
  9 10  1  0  0  0
  9 17  2  0  0  0
 11 12  1  0  0  0
 11 18  2  0  0  0
 13 14  1  0  0  0
 13 19  2  0  0  0
 15 16  1  0  0  0
 15 20  2  0  0  0
 17 19  1  0  0  0
 17 21  1  0  0  0
 18 20  1  0  0  0
 18 46  1  0  0  0
 19 52  1  0  0  0
 20 52  1  0  0  0
 21 46  2  0  0  0
 21 47  1  0  0  0
 22 23  1  0  0  0
 22 24  1  0  0  0
 22 28  1  0  0  0
 22 48  1  0  0  0
 25 26  1  0  0  0
 25 27  1  0  0  0
 25 31  1  0  0  0
 25 48  1  0  0  0
 28 29  1  0  0  0
 28 30  1  0  0  0
 28 47  1  0  0  0
 31 32  1  0  0  0
 31 33  1  0  0  0
 31 47  1  0  0  0
 34 35  1  0  0  0
 34 36  1  0  0  0
 34 40  1  0  0  0
 34 48  1  0  0  0
 37 38  1  0  0  0
 37 39  1  0  0  0
 37 43  1  0  0  0
 37 49  1  0  0  0
 40 41  1  0  0  0
 40 42  1  0  0  0
 40 51  1  0  0  0
 43 44  1  0  0  0
 43 45  1  0  0  0
 43 51  1  0  0  0
 49 50  1  0  0  0
M  END
$$$$
Molecule-095-Almotriptan
  Cerius2 10300711153D 1   1.00000                          
Structure written by Cerius2 SD Exporter
 48 50  0  0  0  0  0  0  0  0999 V2000
    0.8951   -1.3710   -0.4446 C   0  0  0  0  0  0
    0.3007   -2.4173    0.2594 C   0  0  0  0  0  0
    0.1492   -0.6116   -1.3656 C   0  0  0  0  0  0
    0.5904    0.1619   -1.8678 H   0  0  0  0  0  0
   -1.0465   -2.7558    0.0656 C   0  0  0  0  0  0
   -1.4684   -3.5266    0.5868 H   0  0  0  0  0  0
   -1.8007   -2.0072   -0.8616 C   0  0  0  0  0  0
   -2.7846   -2.2504   -1.0019 H   0  0  0  0  0  0
    2.2279   -1.3021   -0.0331 C   0  0  0  0  0  0
   -1.2167   -0.9294   -1.5799 C   0  0  0  0  0  0
    2.3780   -2.3143    0.9196 C   0  0  0  0  0  0
    3.2412   -2.5339    1.4212 H   0  0  0  0  0  0
    3.2911   -0.3773   -0.4927 C   0  0  0  0  0  0
    4.1411   -0.9812   -0.8137 H   0  0  0  0  0  0
    2.9479    0.1910   -1.3592 H   0  0  0  0  0  0
   -4.4171    0.7812    1.7418 C   0  0  0  0  0  0
   -4.9303    1.7048    2.0276 H   0  0  0  0  0  0
   -4.1597    0.2172    2.6421 H   0  0  0  0  0  0
   -5.2977   -0.0359    0.7873 C   0  0  0  0  0  0
   -5.0386   -1.0974    0.8522 H   0  0  0  0  0  0
   -6.3617    0.0913    1.0023 H   0  0  0  0  0  0
    3.7272    0.6258    0.6082 C   0  0  0  0  0  0
    2.8149    1.1155    0.9654 H   0  0  0  0  0  0
    4.1600    0.0874    1.4573 H   0  0  0  0  0  0
   -3.1789    1.1015    0.8864 C   0  0  0  0  0  0
   -2.8133    2.1088    1.1092 H   0  0  0  0  0  0
   -2.3833    0.3772    1.0869 H   0  0  0  0  0  0
   -4.9177    0.5218   -0.5940 C   0  0  0  0  0  0
   -4.9956   -0.2610   -1.3542 H   0  0  0  0  0  0
   -5.5770    1.3531   -0.8635 H   0  0  0  0  0  0
   -2.0276   -0.1226   -2.5255 C   0  0  0  0  0  0
   -1.4327    0.1600   -3.3963 H   0  0  0  0  0  0
   -2.8869   -0.6888   -2.8893 H   0  0  0  0  0  0
    6.0768    1.1513   -0.1228 C   0  0  0  0  0  0
    6.5276    0.8139    0.8135 H   0  0  0  0  0  0
    6.0801    0.3226   -0.8304 H   0  0  0  0  0  0
    6.7061    1.9342   -0.5512 H   0  0  0  0  0  0
    4.6812    2.9119    0.9131 C   0  0  0  0  0  0
    5.0092    2.7197    1.9378 H   0  0  0  0  0  0
    5.3362    3.6653    0.4702 H   0  0  0  0  0  0
    3.6762    3.3389    0.9402 H   0  0  0  0  0  0
    1.2120   -2.9658    1.0743 N   0  0  0  0  0  0
    1.0560   -3.7120    1.6754 H   0  0  0  0  0  0
    4.6908    1.6593    0.1009 N   0  0  0  0  0  0
   -3.6143    0.9868   -0.4334 N   0  0  0  0  0  0
   -1.4131    2.2855   -1.2728 O   0  0  0  0  0  0
   -3.4946    2.1924   -2.7940 O   0  0  0  0  0  0
   -2.6400    1.3784   -1.7284 S   0  0  0  0  0  0
  1  2  2  0  0  0
  1  3  1  0  0  0
  1  9  1  0  0  0
  2  5  1  0  0  0
  2 42  1  0  0  0
  3  4  1  0  0  0
  3 10  2  0  0  0
  5  6  1  0  0  0
  5  7  2  0  0  0
  7  8  1  0  0  0
  7 10  1  0  0  0
  9 11  2  0  0  0
  9 13  1  0  0  0
 10 31  1  0  0  0
 11 12  1  0  0  0
 11 42  1  0  0  0
 13 14  1  0  0  0
 13 15  1  0  0  0
 13 22  1  0  0  0
 16 17  1  0  0  0
 16 18  1  0  0  0
 16 19  1  0  0  0
 16 25  1  0  0  0
 19 20  1  0  0  0
 19 21  1  0  0  0
 19 28  1  0  0  0
 22 23  1  0  0  0
 22 24  1  0  0  0
 22 44  1  0  0  0
 25 26  1  0  0  0
 25 27  1  0  0  0
 25 45  1  0  0  0
 28 29  1  0  0  0
 28 30  1  0  0  0
 28 45  1  0  0  0
 31 32  1  0  0  0
 31 33  1  0  0  0
 31 48  1  0  0  0
 34 35  1  0  0  0
 34 36  1  0  0  0
 34 37  1  0  0  0
 34 44  1  0  0  0
 38 39  1  0  0  0
 38 40  1  0  0  0
 38 41  1  0  0  0
 38 44  1  0  0  0
 42 43  1  0  0  0
 45 48  1  0  0  0
 46 48  2  0  0  0
 47 48  2  0  0  0
M  END
$$$$
Molecule-096-Clavulanic_acid
  Cerius2 10300711153D 1   1.00000                          
Structure written by Cerius2 SD Exporter
 23 24  0  0  0  0  0  0  0  0999 V2000
    1.2788    0.9760   -0.0995 C   0  0  0  0  0  0
    1.4955    1.7962    0.4727 H   0  0  0  0  0  0
    0.1879    0.1707    0.2528 C   0  0  0  0  0  0
   -2.9351   -0.4858    0.5881 C   0  0  0  0  0  0
   -0.1023    0.1401    2.7102 C   0  0  0  0  0  0
   -2.7425   -1.5777   -0.3646 C   0  0  0  0  0  0
   -2.8197   -1.2597   -1.4061 H   0  0  0  0  0  0
   -3.3332   -2.4633   -0.1223 H   0  0  0  0  0  0
   -0.7134    0.4270    1.3958 C   0  0  0  0  0  0
   -1.1259    1.4394    1.3519 H   0  0  0  0  0  0
   -1.2793   -1.6126    0.1736 C   0  0  0  0  0  0
    2.1220    0.6724   -1.2671 C   0  0  0  0  0  0
    2.6038   -0.2984   -1.1305 H   0  0  0  0  0  0
    1.5058    0.6424   -2.1688 H   0  0  0  0  0  0
   -1.6619   -0.5286    0.9743 N   0  0  0  0  0  0
    0.4520   -1.0589    2.9954 O   0  0  0  0  0  0
    0.8462   -1.2002    3.8806 H   0  0  0  0  0  0
    3.1240    1.6721   -1.4258 O   0  0  0  0  0  0
    3.6271    1.4089   -2.2256 H   0  0  0  0  0  0
   -3.8640    0.3259    0.7867 O   0  0  0  0  0  0
   -0.0758    1.0128    3.6056 O   0  0  0  0  0  0
   -0.1829   -0.9387   -0.4506 O   0  0  0  0  0  0
   -1.0057   -2.5033    0.7505 H   0  0  0  0  0  0
  1  2  1  0  0  0
  1  3  2  0  0  0
  1 12  1  0  0  0
  3  9  1  0  0  0
  3 22  1  0  0  0
  4  6  1  0  0  0
  4 15  1  0  0  0
  4 20  2  0  0  0
  5  9  1  0  0  0
  5 16  1  0  0  0
  5 21  2  0  0  0
  6  7  1  0  0  0
  6  8  1  0  0  0
  6 11  1  0  0  0
  9 10  1  0  0  0
  9 15  1  0  0  0
 11 15  1  0  0  0
 11 22  1  0  0  0
 12 13  1  0  0  0
 12 14  1  0  0  0
 12 18  1  0  0  0
 16 17  1  0  0  0
 18 19  1  0  0  0
 23 11  1  0  0  0
M  END
$$$$
Molecule-097-Ketoconazole
  Cerius2 10300711153D 1   1.00000                          
Structure written by Cerius2 SD Exporter
 64 68  0  0  0  0  0  0  0  0999 V2000
   -5.7218    1.7063   -1.2504 C   0  0  0  0  0  0
   -5.5474    1.2698   -2.1595 H   0  0  0  0  0  0
   -2.1995   -6.4887   -3.2196 C   0  0  0  0  0  0
   -2.2274   -7.4107   -2.7782 H   0  0  0  0  0  0
   -1.8577   -5.0744   -5.1618 C   0  0  0  0  0  0
   -1.6514   -4.9523   -6.1555 H   0  0  0  0  0  0
   -2.4587   -5.3498   -2.4338 C   0  0  0  0  0  0
   -2.6769   -5.4694   -1.4434 H   0  0  0  0  0  0
   -2.1150   -3.9348   -4.3752 C   0  0  0  0  0  0
   -2.0832   -3.0070   -4.8044 H   0  0  0  0  0  0
   -6.0430    3.0736   -1.2349 C   0  0  0  0  0  0
   -6.0897    3.5936   -2.1149 H   0  0  0  0  0  0
   -6.2388    2.9861    1.1816 C   0  0  0  0  0  0
   -6.4355    3.4640    2.0656 H   0  0  0  0  0  0
   -5.6365    0.9412   -0.0561 C   0  0  0  0  0  0
   -1.8924   -6.3706   -4.5956 C   0  0  0  0  0  0
   -2.4143   -4.0590   -3.0051 C   0  0  0  0  0  0
   -6.2985    3.7191   -0.0155 C   0  0  0  0  0  0
   -5.9197    1.6105    1.1732 C   0  0  0  0  0  0
   -9.6472   -0.7636    1.0624 C   0  0  0  0  0  0
  -10.5896   -0.3858    1.1707 H   0  0  0  0  0  0
   -8.8265   -0.5979   -0.0431 C   0  0  0  0  0  0
   -9.0636   -0.0744   -0.8889 H   0  0  0  0  0  0
   -7.7957   -1.7912    1.4357 C   0  0  0  0  0  0
   -7.0801   -2.3489    1.9084 H   0  0  0  0  0  0
   -1.1867  -10.2113   -8.5528 C   0  0  0  0  0  0
   -2.3319  -10.7167   -9.3455 C   0  0  0  0  0  0
   -1.9992  -11.2108  -10.2614 H   0  0  0  0  0  0
   -2.8992  -11.4400   -8.7594 H   0  0  0  0  0  0
   -2.9823   -9.8878   -9.6259 H   0  0  0  0  0  0
   -3.0924   -1.2508   -0.5532 C   0  0  0  0  0  0
   -2.2032   -0.7073   -0.8833 H   0  0  0  0  0  0
   -5.2886   -0.5247   -0.1824 C   0  0  0  0  0  0
   -6.5308   -1.3386   -0.6598 C   0  0  0  0  0  0
   -6.7994   -1.0041   -1.6663 H   0  0  0  0  0  0
   -6.2523   -2.3914   -0.7541 H   0  0  0  0  0  0
   -0.4020   -7.5855   -6.1045 C   0  0  0  0  0  0
    0.4492   -7.3015   -5.4778 H   0  0  0  0  0  0
   -0.4442   -6.8973   -6.9528 H   0  0  0  0  0  0
   -2.5779   -8.5829   -5.3817 C   0  0  0  0  0  0
   -3.5911   -8.2594   -5.1203 H   0  0  0  0  0  0
   -2.2671   -9.3279   -4.6436 H   0  0  0  0  0  0
   -0.1433   -9.0114   -6.6656 C   0  0  0  0  0  0
    0.7534   -8.9655   -7.2905 H   0  0  0  0  0  0
    0.0782   -9.6822   -5.8310 H   0  0  0  0  0  0
   -2.6182   -9.2598   -6.7816 C   0  0  0  0  0  0
   -3.1826  -10.1907   -6.6786 H   0  0  0  0  0  0
   -3.1718   -8.5960   -7.4521 H   0  0  0  0  0  0
   -3.3509   -0.9984    0.9348 C   0  0  0  0  0  0
   -2.8550   -1.7210    1.5859 H   0  0  0  0  0  0
   -3.0437    0.0121    1.2228 H   0  0  0  0  0  0
   -2.9276   -2.7512   -0.9099 C   0  0  0  0  0  0
   -2.0995   -3.1701   -0.3325 H   0  0  0  0  0  0
   -3.8423   -3.2935   -0.6598 H   0  0  0  0  0  0
   -8.9956   -1.5054    1.9684 N   0  0  0  0  0  0
   -7.6741   -1.2433    0.2088 N   0  0  0  0  0  0
   -1.6335   -7.4853   -5.3443 N   0  0  0  0  0  0
   -1.3108   -9.5245   -7.3680 N   0  0  0  0  0  0
   -0.0536  -10.4552   -9.0336 O   0  0  0  0  0  0
   -2.6404   -2.9088   -2.3076 O   0  0  0  0  0  0
   -4.7634   -1.1333    1.0126 O   0  0  0  0  0  0
   -4.2529   -0.6946   -1.1772 O   0  0  0  0  0  0
   -6.6820    5.3678    0.0096 Cl  0  0  0  0  0  0
   -5.9352    0.8633    2.6983 Cl  0  0  0  0  0  0
  1  2  1  0  0  0
  1 11  1  0  0  0
  1 15  2  0  0  0
  3  4  1  0  0  0
  3  7  2  0  0  0
  3 16  1  0  0  0
  5  6  1  0  0  0
  5  9  1  0  0  0
  5 16  2  0  0  0
  7  8  1  0  0  0
  7 17  1  0  0  0
  9 10  1  0  0  0
  9 17  2  0  0  0
 11 12  1  0  0  0
 11 18  2  0  0  0
 13 14  1  0  0  0
 13 18  1  0  0  0
 13 19  2  0  0  0
 15 19  1  0  0  0
 15 33  1  0  0  0
 16 57  1  0  0  0
 17 60  1  0  0  0
 18 63  1  0  0  0
 19 64  1  0  0  0
 20 21  1  0  0  0
 20 22  2  0  0  0
 20 55  1  0  0  0
 22 23  1  0  0  0
 22 56  1  0  0  0
 24 25  1  0  0  0
 24 55  2  0  0  0
 24 56  1  0  0  0
 26 27  1  0  0  0
 26 58  1  0  0  0
 26 59  2  0  0  0
 27 28  1  0  0  0
 27 29  1  0  0  0
 27 30  1  0  0  0
 31 32  1  0  0  0
 31 49  1  0  0  0
 31 52  1  0  0  0
 31 62  1  0  0  0
 33 34  1  0  0  0
 33 61  1  0  0  0
 33 62  1  0  0  0
 34 35  1  0  0  0
 34 36  1  0  0  0
 34 56  1  0  0  0
 37 38  1  0  0  0
 37 39  1  0  0  0
 37 43  1  0  0  0
 37 57  1  0  0  0
 40 41  1  0  0  0
 40 42  1  0  0  0
 40 46  1  0  0  0
 40 57  1  0  0  0
 43 44  1  0  0  0
 43 45  1  0  0  0
 43 58  1  0  0  0
 46 47  1  0  0  0
 46 48  1  0  0  0
 46 58  1  0  0  0
 49 50  1  0  0  0
 49 51  1  0  0  0
 49 61  1  0  0  0
 52 53  1  0  0  0
 52 54  1  0  0  0
 52 60  1  0  0  0
M  END
$$$$
Molecule-098-Mesna
  Cerius2 10300711153D 1   1.00000                          
Structure written by Cerius2 SD Exporter
 13 12  0  0  0  0  0  0  0  0999 V2000
    1.2768    0.7075   -0.2328 C   0  0  0  0  0  0
    1.1078    1.0461   -1.2575 H   0  0  0  0  0  0
    1.1014    1.5443    0.4471 H   0  0  0  0  0  0
    0.3293   -0.4663    0.1033 C   0  0  0  0  0  0
    0.5145   -1.3005   -0.5761 H   0  0  0  0  0  0
    0.5024   -0.8034    1.1270 H   0  0  0  0  0  0
   -2.3912   -1.3207    0.3120 O   0  0  0  0  0  0
   -3.1983   -1.1128   -0.2003 H   0  0  0  0  0  0
   -1.7493    0.4308   -1.5330 O   0  0  0  0  0  0
   -1.7764    1.1783    0.9523 O   0  0  0  0  0  0
    3.0047    0.2102   -0.0857 S   0  0  0  0  0  0
    2.8841   -0.0539    1.2434 H   0  0  0  0  0  0
   -1.4089   -0.0019   -0.0441 S   0  0  0  0  0  0
  1  2  1  0  0  0
  1  3  1  0  0  0
  1  4  1  0  0  0
  1 11  1  0  0  0
  4  5  1  0  0  0
  4  6  1  0  0  0
  4 13  1  0  0  0
  7  8  1  0  0  0
  7 13  1  0  0  0
  9 13  2  0  0  0
 10 13  2  0  0  0
 11 12  1  0  0  0
M  END
$$$$
Molecule-099-Oseltamivir
  Cerius2 10300711153D 1   1.00000                          
Structure written by Cerius2 SD Exporter
 50 50  0  0  0  0  0  0  0  0999 V2000
    0.5148   -0.8142    0.4272 C   0  0  0  0  0  0
    0.3066   -1.8122    0.3290 H   0  0  0  0  0  0
    1.8510   -0.3684    0.2949 C   0  0  0  0  0  0
   -1.2276    2.7475   -1.5138 C   0  0  0  0  0  0
    2.8851   -1.2714   -0.0450 C   0  0  0  0  0  0
   -1.1137    2.9423   -2.9665 C   0  0  0  0  0  0
   -1.8626    3.6494   -3.3279 H   0  0  0  0  0  0
   -0.1228    3.3298   -3.2079 H   0  0  0  0  0  0
   -1.2594    1.9891   -3.4767 H   0  0  0  0  0  0
   -4.6383   -1.3921    2.5855 C   0  0  0  0  0  0
   -5.1381   -0.5628    2.0814 H   0  0  0  0  0  0
   -5.0872   -2.3268    2.2434 H   0  0  0  0  0  0
   -4.8014   -1.3145    3.6609 H   0  0  0  0  0  0
   -3.4936    1.4406    4.3444 C   0  0  0  0  0  0
   -3.3848    1.7398    5.3888 H   0  0  0  0  0  0
   -3.4447    2.3372    3.7230 H   0  0  0  0  0  0
   -4.4735    0.9824    4.2210 H   0  0  0  0  0  0
    6.5511   -0.6876   -0.6005 C   0  0  0  0  0  0
    6.4035    0.0903   -1.3518 H   0  0  0  0  0  0
    6.7180   -0.2163    0.3699 H   0  0  0  0  0  0
    7.4337   -1.2724   -0.8658 H   0  0  0  0  0  0
    2.1895    1.0754    0.4831 C   0  0  0  0  0  0
    3.0677    1.1645    1.1300 H   0  0  0  0  0  0
    2.4677    1.4791   -0.4945 H   0  0  0  0  0  0
   -3.1268   -1.3930    2.2643 C   0  0  0  0  0  0
   -2.6420   -2.1689    2.8631 H   0  0  0  0  0  0
   -3.0184   -1.6815    1.2160 H   0  0  0  0  0  0
   -2.3582    0.4600    3.9631 C   0  0  0  0  0  0
   -1.4203    0.9932    4.1433 H   0  0  0  0  0  0
   -2.3729   -0.3925    4.6468 H   0  0  0  0  0  0
   -0.3337    1.5861    0.5053 C   0  0  0  0  0  0
   -1.0855    2.1690    1.0460 H   0  0  0  0  0  0
    1.0610    1.9628    1.0835 C   0  0  0  0  0  0
    1.2777    3.0099    0.8490 H   0  0  0  0  0  0
   -2.3866   -0.0369    2.4820 C   0  0  0  0  0  0
   -2.8653    0.7313    1.8640 H   0  0  0  0  0  0
   -0.6404    0.0674    0.7163 C   0  0  0  0  0  0
   -1.4444   -0.2252    0.0316 H   0  0  0  0  0  0
    5.3146   -1.6010   -0.5377 C   0  0  0  0  0  0
    5.1641   -2.0771   -1.5103 H   0  0  0  0  0  0
    5.4732   -2.3770    0.2160 H   0  0  0  0  0  0
   -0.3717    1.8981   -0.9002 N   0  0  0  0  0  0
    0.2791    1.4535   -1.4655 H   0  0  0  0  0  0
    1.0625    1.8544    2.5532 N   0  0  0  0  0  0
    0.4420    2.5846    2.9097 H   0  0  0  0  0  0
    0.6067    0.9668    2.7647 H   0  0  0  0  0  0
   -2.1121    3.3667   -0.8785 O   0  0  0  0  0  0
    2.6571   -2.4928   -0.2220 O   0  0  0  0  0  0
    4.1620   -0.8203   -0.1955 O   0  0  0  0  0  0
   -1.0060   -0.2320    2.0850 O   0  0  0  0  0  0
  1  2  1  0  0  0
  1  3  2  0  0  0
  1 37  1  0  0  0
  3  5  1  0  0  0
  3 22  1  0  0  0
  4  6  1  0  0  0
  4 42  1  0  0  0
  4 47  2  0  0  0
  5 48  2  0  0  0
  5 49  1  0  0  0
  6  7  1  0  0  0
  6  8  1  0  0  0
  6  9  1  0  0  0
 10 11  1  0  0  0
 10 12  1  0  0  0
 10 13  1  0  0  0
 10 25  1  0  0  0
 14 15  1  0  0  0
 14 16  1  0  0  0
 14 17  1  0  0  0
 14 28  1  0  0  0
 18 19  1  0  0  0
 18 20  1  0  0  0
 18 21  1  0  0  0
 18 39  1  0  0  0
 22 23  1  0  0  0
 22 24  1  0  0  0
 22 33  1  0  0  0
 25 26  1  0  0  0
 25 27  1  0  0  0
 25 35  1  0  0  0
 28 29  1  0  0  0
 28 30  1  0  0  0
 28 35  1  0  0  0
 31 32  1  0  0  0
 31 33  1  0  0  0
 31 37  1  0  0  0
 31 42  1  0  0  0
 33 34  1  0  0  0
 33 44  1  0  0  0
 35 36  1  0  0  0
 35 50  1  0  0  0
 37 38  1  0  0  0
 37 50  1  0  0  0
 39 40  1  0  0  0
 39 41  1  0  0  0
 39 49  1  0  0  0
 42 43  1  0  0  0
 44 45  1  0  0  0
 44 46  1  0  0  0
M  END
$$$$
Molecule-100-Primidone
  Cerius2 10300711153D 1   1.00000                          
Structure written by Cerius2 SD Exporter
 30 31  0  0  0  0  0  0  0  0999 V2000
    3.9051    0.1937    0.7477 C   0  0  0  0  0  0
    4.9180    0.2408    0.8812 H   0  0  0  0  0  0
    3.1111    1.3288    0.9664 C   0  0  0  0  0  0
    3.5473    2.2077    1.2558 H   0  0  0  0  0  0
    3.3023   -1.0045    0.3380 C   0  0  0  0  0  0
    3.8790   -1.8322    0.1683 H   0  0  0  0  0  0
    1.7178    1.2588    0.7837 C   0  0  0  0  0  0
    1.1884    2.1175    0.9380 H   0  0  0  0  0  0
    1.9081   -1.0667    0.1571 C   0  0  0  0  0  0
    1.5281   -1.9595   -0.1599 H   0  0  0  0  0  0
    1.0615    0.0566    0.3917 C   0  0  0  0  0  0
   -0.7732    0.8058   -1.0315 C   0  0  0  0  0  0
   -0.9697   -1.3869    0.0394 C   0  0  0  0  0  0
   -2.7714    0.6167    1.3890 C   0  0  0  0  0  0
   -3.1344    1.1347    0.4997 H   0  0  0  0  0  0
   -3.1502   -0.4064    1.3824 H   0  0  0  0  0  0
   -3.1768    1.1211    2.2687 H   0  0  0  0  0  0
   -1.2192    0.6386    1.4433 C   0  0  0  0  0  0
   -0.9427    1.6867    1.5744 H   0  0  0  0  0  0
   -0.9088    0.1189    2.3553 H   0  0  0  0  0  0
   -0.4547    0.0174    0.2057 C   0  0  0  0  0  0
   -1.7560   -1.0750   -2.2578 C   0  0  0  0  0  0
   -1.2072   -1.5302   -3.0851 H   0  0  0  0  0  0
   -2.8209   -1.0961   -2.4997 H   0  0  0  0  0  0
   -1.3512    0.2829   -2.1325 N   0  0  0  0  0  0
   -1.5034    0.8807   -2.8814 H   0  0  0  0  0  0
   -1.5468   -1.8539   -1.0864 N   0  0  0  0  0  0
   -1.8355   -2.7802   -1.0888 H   0  0  0  0  0  0
   -0.5282    2.0314   -1.1099 O   0  0  0  0  0  0
   -0.8787   -2.2197    0.9708 O   0  0  0  0  0  0
  1  2  1  0  0  0
  1  3  2  0  0  0
  1  5  1  0  0  0
  3  4  1  0  0  0
  3  7  1  0  0  0
  5  6  1  0  0  0
  5  9  2  0  0  0
  7  8  1  0  0  0
  7 11  2  0  0  0
  9 10  1  0  0  0
  9 11  1  0  0  0
 11 21  1  0  0  0
 12 21  1  0  0  0
 12 25  1  0  0  0
 12 29  2  0  0  0
 13 21  1  0  0  0
 13 27  1  0  0  0
 13 30  2  0  0  0
 14 15  1  0  0  0
 14 16  1  0  0  0
 14 17  1  0  0  0
 14 18  1  0  0  0
 18 19  1  0  0  0
 18 20  1  0  0  0
 18 21  1  0  0  0
 22 23  1  0  0  0
 22 24  1  0  0  0
 22 25  1  0  0  0
 22 27  1  0  0  0
 25 26  1  0  0  0
 27 28  1  0  0  0
M  END
$$$$
Molecule-101-Ethylmorphine
  Cerius2 10300711153D 1   1.00000                          
Structure written by Cerius2 SD Exporter
 43 47  0  0  0  0  0  0  0  0999 V2000
   -2.4160    2.8326   -1.0343 C   0  0  0  0  0  0
   -2.8044    3.6332   -1.5374 H   0  0  0  0  0  0
   -1.0173    2.7423   -0.8300 C   0  0  0  0  0  0
   -0.4036    3.4620   -1.2191 H   0  0  0  0  0  0
    0.3290   -2.4686    0.8482 C   0  0  0  0  0  0
    1.2259   -2.8470    1.0481 H   0  0  0  0  0  0
   -0.7716   -3.2478    0.8999 C   0  0  0  0  0  0
   -0.6689   -4.2095    1.1302 H   0  0  0  0  0  0
   -3.2775    1.8030   -0.5901 C   0  0  0  0  0  0
   -2.7238    0.7243    0.1232 C   0  0  0  0  0  0
    3.8363    0.0870    3.5042 C   0  0  0  0  0  0
    3.8345   -1.0043    3.4759 H   0  0  0  0  0  0
    4.8701    0.4334    3.5636 H   0  0  0  0  0  0
    3.3139    0.4194    4.4013 H   0  0  0  0  0  0
    1.0009    1.3220   -0.1073 C   0  0  0  0  0  0
    1.3327    1.2858   -1.1484 H   0  0  0  0  0  0
    1.5379    2.1447    0.3674 H   0  0  0  0  0  0
   -0.4653    1.6411   -0.1337 C   0  0  0  0  0  0
   -1.3737    0.7236    0.4341 C   0  0  0  0  0  0
    0.1936   -1.0760    0.4487 C   0  0  0  0  0  0
   -1.0040   -0.4421    1.2330 C   0  0  0  0  0  0
    1.3899   -0.0644    0.5653 C   0  0  0  0  0  0
    2.2220   -0.5017    0.0026 H   0  0  0  0  0  0
   -2.1159   -2.7249    0.6131 C   0  0  0  0  0  0
   -2.8566   -3.3958    1.0581 H   0  0  0  0  0  0
   -2.3311   -1.2868    1.2060 C   0  0  0  0  0  0
    3.1667    0.6505    2.2314 C   0  0  0  0  0  0
    3.1242    1.7417    2.2963 H   0  0  0  0  0  0
    3.8317    0.4028    1.3992 H   0  0  0  0  0  0
    0.7296    0.6644    2.8698 C   0  0  0  0  0  0
    0.5799    1.7212    2.6327 H   0  0  0  0  0  0
    1.0167    0.6115    3.9222 H   0  0  0  0  0  0
    1.8001    0.0732    2.0062 N   0  0  0  0  0  0
   -4.6011    1.8470   -0.8623 O   0  0  0  0  0  0
   -5.1826    1.1174   -0.5582 H   0  0  0  0  0  0
   -2.3423   -2.7660   -0.7959 O   0  0  0  0  0  0
   -1.7601   -2.0799   -1.1805 H   0  0  0  0  0  0
   -3.2872   -0.4371    0.5346 O   0  0  0  0  0  0
   -2.7261   -1.4220    2.2187 H   0  0  0  0  0  0
   -0.6112   -0.0916    2.7139 C   0  0  0  0  0  0
   -0.0286   -1.1425   -0.6260 H   0  0  0  0  0  0
   -1.4034    0.4988    3.1848 H   0  0  0  0  0  0
   -0.5234   -1.0257    3.2773 H   0  0  0  0  0  0
  1  2  1  0  0  0
  1  3  2  0  0  0
  1  9  1  0  0  0
  3  4  1  0  0  0
  3 18  1  0  0  0
  5  6  1  0  0  0
  5  7  2  0  0  0
  5 20  1  0  0  0
  7  8  1  0  0  0
  7 24  1  0  0  0
  9 10  2  0  0  0
  9 34  1  0  0  0
 10 19  1  0  0  0
 10 38  1  0  0  0
 11 12  1  0  0  0
 11 13  1  0  0  0
 11 14  1  0  0  0
 11 27  1  0  0  0
 15 16  1  0  0  0
 15 17  1  0  0  0
 15 18  1  0  0  0
 15 22  1  0  0  0
 18 19  2  0  0  0
 19 21  1  0  0  0
 20 21  1  0  0  0
 20 22  1  0  0  0
 20 41  1  0  0  0
 21 26  1  0  0  0
 22 23  1  0  0  0
 22 33  1  0  0  0
 24 25  1  0  0  0
 24 26  1  0  0  0
 24 36  1  0  0  0
 26 38  1  0  0  0
 27 28  1  0  0  0
 27 29  1  0  0  0
 27 33  1  0  0  0
 30 31  1  0  0  0
 30 32  1  0  0  0
 30 33  1  0  0  0
 34 35  1  0  0  0
 36 37  1  0  0  0
 39 26  1  0  0  0
 40 21  1  0  0  0
 40 30  1  0  0  0
 40 42  1  0  0  0
 40 43  1  0  0  0
M  END
$$$$
Molecule-102-Pantoprazole
  Cerius2 10300711153D 1   1.00000                          
Structure written by Cerius2 SD Exporter
 41 43  0  0  0  0  0  0  0  0999 V2000
    3.2950    0.8176   -0.7497 C   0  0  0  0  0  0
    3.4608   -0.5580   -0.6490 C   0  0  0  0  0  0
    4.6768   -1.1092   -0.2120 C   0  0  0  0  0  0
    4.7833   -2.1228   -0.1419 H   0  0  0  0  0  0
    4.3307    1.7050   -0.4209 C   0  0  0  0  0  0
    4.1958    2.7149   -0.4994 H   0  0  0  0  0  0
    5.5585    1.1631    0.0195 C   0  0  0  0  0  0
    6.3169    1.8025    0.2609 H   0  0  0  0  0  0
   -5.1361   -1.2794   -0.3779 C   0  0  0  0  0  0
   -6.1543   -1.3486   -0.3689 H   0  0  0  0  0  0
    5.7422   -0.2427    0.1270 C   0  0  0  0  0  0
   -4.3438   -2.2507   -1.0314 C   0  0  0  0  0  0
   -2.9266   -2.1110   -1.0195 C   0  0  0  0  0  0
   -4.5213   -0.1996    0.2722 C   0  0  0  0  0  0
   -5.0806    0.5101    0.7492 H   0  0  0  0  0  0
   -2.3575   -0.9971   -0.3458 C   0  0  0  0  0  0
    1.4522   -0.1703   -1.3492 C   0  0  0  0  0  0
   -0.8958   -0.7645   -0.2598 C   0  0  0  0  0  0
   -0.6770    0.0908    0.3863 H   0  0  0  0  0  0
   -0.4285   -1.6445    0.1870 H   0  0  0  0  0  0
    8.1368   -0.2179    0.9348 C   0  0  0  0  0  0
    7.9822    0.4597    1.7762 H   0  0  0  0  0  0
   -6.2965   -3.6675   -1.8172 C   0  0  0  0  0  0
   -6.3633   -4.5904   -2.3936 H   0  0  0  0  0  0
   -6.7541   -3.8306   -0.8401 H   0  0  0  0  0  0
   -6.8351   -2.8818   -2.3496 H   0  0  0  0  0  0
   -2.2751   -4.1760   -2.3531 C   0  0  0  0  0  0
   -2.8720   -3.9681   -3.2427 H   0  0  0  0  0  0
   -1.3148   -4.5867   -2.6649 H   0  0  0  0  0  0
   -2.7849   -4.9134   -1.7307 H   0  0  0  0  0  0
    8.6968    0.4653   -0.1162 F   0  0  0  0  0  0
    9.0031   -1.2064    1.3220 F   0  0  0  0  0  0
    2.0497    1.0303   -1.1845 N   0  0  0  0  0  0
    1.6370    1.8939   -1.3521 H   0  0  0  0  0  0
    2.3187   -1.1552   -1.0233 N   0  0  0  0  0  0
   -3.1728   -0.0994    0.2674 N   0  0  0  0  0  0
   -0.6909    1.0272   -2.0370 O   0  0  0  0  0  0
   -4.9158   -3.3150   -1.6697 O   0  0  0  0  0  0
   -2.0437   -2.9722   -1.6138 O   0  0  0  0  0  0
    6.9011   -0.8285    0.5467 O   0  0  0  0  0  0
   -0.1814   -0.4839   -1.9019 S   0  0  0  0  0  0
  1  2  1  0  0  0
  1  5  2  0  0  0
  1 33  1  0  0  0
  2  3  2  0  0  0
  2 35  1  0  0  0
  3  4  1  0  0  0
  3 11  1  0  0  0
  5  6  1  0  0  0
  5  7  1  0  0  0
  7  8  1  0  0  0
  7 11  2  0  0  0
  9 10  1  0  0  0
  9 12  1  0  0  0
  9 14  2  0  0  0
 11 40  1  0  0  0
 12 13  2  0  0  0
 12 38  1  0  0  0
 13 16  1  0  0  0
 13 39  1  0  0  0
 14 15  1  0  0  0
 14 36  1  0  0  0
 16 18  1  0  0  0
 16 36  2  0  0  0
 17 33  1  0  0  0
 17 35  2  0  0  0
 17 41  1  0  0  0
 18 19  1  0  0  0
 18 20  1  0  0  0
 18 41  1  0  0  0
 21 22  1  0  0  0
 21 31  1  0  0  0
 21 32  1  0  0  0
 21 40  1  0  0  0
 23 24  1  0  0  0
 23 25  1  0  0  0
 23 26  1  0  0  0
 23 38  1  0  0  0
 27 28  1  0  0  0
 27 29  1  0  0  0
 27 30  1  0  0  0
 27 39  1  0  0  0
 33 34  1  0  0  0
 37 41  2  0  0  0
M  END
$$$$
Molecule-103-Sibutramine
  Cerius2 10300711153D 1   1.00000                          
Structure written by Cerius2 SD Exporter
 45 46  0  0  0  0  0  0  0  0999 V2000
    2.1849    0.8979    0.7282 C   0  0  0  0  0  0
    1.6122    1.6428    1.1275 H   0  0  0  0  0  0
    2.5002   -1.3764   -0.0419 C   0  0  0  0  0  0
    2.1566   -2.3207   -0.2290 H   0  0  0  0  0  0
    3.5079    1.2087    0.3641 C   0  0  0  0  0  0
    3.8638    2.1563    0.5122 H   0  0  0  0  0  0
    3.8249   -1.0732   -0.4063 C   0  0  0  0  0  0
    4.4125   -1.7984   -0.8248 H   0  0  0  0  0  0
    1.6503   -0.4040    0.5474 C   0  0  0  0  0  0
    4.3335    0.2214   -0.2017 C   0  0  0  0  0  0
   -2.8327    2.1383    0.3718 C   0  0  0  0  0  0
   -3.1233    3.0235    0.9416 H   0  0  0  0  0  0
   -3.4500    2.0874   -0.5275 H   0  0  0  0  0  0
   -3.0492    1.2682    0.9906 H   0  0  0  0  0  0
   -1.0212    3.5420   -0.7366 C   0  0  0  0  0  0
   -1.3140    4.3943   -0.1195 H   0  0  0  0  0  0
    0.0476    3.6323   -0.9426 H   0  0  0  0  0  0
   -1.5638    3.5948   -1.6832 H   0  0  0  0  0  0
   -0.4657   -1.5624    2.9014 C   0  0  0  0  0  0
   -1.5269   -1.7601    3.0779 H   0  0  0  0  0  0
    0.1590   -1.8159    3.7627 H   0  0  0  0  0  0
   -0.1974   -0.1621    2.3422 C   0  0  0  0  0  0
   -1.1064    0.4399    2.3525 H   0  0  0  0  0  0
    0.6020    0.3307    2.9027 H   0  0  0  0  0  0
    0.0421   -2.1485    1.5813 C   0  0  0  0  0  0
    0.9650   -2.7092    1.7509 H   0  0  0  0  0  0
   -0.7092   -2.7815    1.1031 H   0  0  0  0  0  0
   -0.8468    0.9855   -0.8613 C   0  0  0  0  0  0
   -1.4967    0.9503   -1.7401 H   0  0  0  0  0  0
    0.1576    1.1982   -1.2305 H   0  0  0  0  0  0
   -1.3231    2.2043   -0.0010 C   0  0  0  0  0  0
   -0.7476    2.2334    0.9243 H   0  0  0  0  0  0
    0.2236   -0.7248    0.9360 C   0  0  0  0  0  0
   -0.8337   -0.4516   -0.2195 C   0  0  0  0  0  0
   -1.8096   -0.5497    0.2624 H   0  0  0  0  0  0
    0.1095   -1.3424   -2.4733 C   0  0  0  0  0  0
    0.3784   -2.3094   -2.9026 H   0  0  0  0  0  0
   -0.4095   -0.7575   -3.2360 H   0  0  0  0  0  0
    1.0356   -0.8272   -2.2306 H   0  0  0  0  0  0
   -2.0559   -2.1914   -1.6268 C   0  0  0  0  0  0
   -1.9001   -3.0598   -2.2709 H   0  0  0  0  0  0
   -2.5676   -2.5464   -0.7303 H   0  0  0  0  0  0
   -2.7073   -1.4830   -2.1437 H   0  0  0  0  0  0
   -0.7552   -1.5464   -1.2693 N   0  0  0  0  0  0
    5.9262    0.5909   -0.6397 Cl  0  0  0  0  0  0
  1  2  1  0  0  0
  1  5  1  0  0  0
  1  9  2  0  0  0
  3  4  1  0  0  0
  3  7  2  0  0  0
  3  9  1  0  0  0
  5  6  1  0  0  0
  5 10  2  0  0  0
  7  8  1  0  0  0
  7 10  1  0  0  0
  9 33  1  0  0  0
 10 45  1  0  0  0
 11 12  1  0  0  0
 11 13  1  0  0  0
 11 14  1  0  0  0
 11 31  1  0  0  0
 15 16  1  0  0  0
 15 17  1  0  0  0
 15 18  1  0  0  0
 15 31  1  0  0  0
 19 20  1  0  0  0
 19 21  1  0  0  0
 19 22  1  0  0  0
 19 25  1  0  0  0
 22 23  1  0  0  0
 22 24  1  0  0  0
 22 33  1  0  0  0
 25 26  1  0  0  0
 25 27  1  0  0  0
 25 33  1  0  0  0
 28 29  1  0  0  0
 28 30  1  0  0  0
 28 31  1  0  0  0
 28 34  1  0  0  0
 31 32  1  0  0  0
 33 34  1  0  0  0
 34 35  1  0  0  0
 34 44  1  0  0  0
 36 37  1  0  0  0
 36 38  1  0  0  0
 36 39  1  0  0  0
 36 44  1  0  0  0
 40 41  1  0  0  0
 40 42  1  0  0  0
 40 43  1  0  0  0
 40 44  1  0  0  0
M  END
$$$$
Molecule-104-Tolterodine
  Cerius2 10300711153D 1   1.00000                          
Structure written by Cerius2 SD Exporter
 55 56  0  0  0  0  0  0  0  0999 V2000
   -1.4688   -2.3068    4.9695 C   0  0  0  0  0  0
   -1.5380   -2.6963    5.9124 H   0  0  0  0  0  0
   -2.1343   -2.9281    3.8998 C   0  0  0  0  0  0
   -2.6896   -3.7707    4.0648 H   0  0  0  0  0  0
   -0.7119   -1.1459    4.7407 C   0  0  0  0  0  0
   -0.2340   -0.6865    5.5194 H   0  0  0  0  0  0
   -2.6099    3.3010   -0.0985 C   0  0  0  0  0  0
   -2.9268    4.2445   -0.3377 H   0  0  0  0  0  0
   -2.0348   -2.3929    2.6021 C   0  0  0  0  0  0
   -2.5266   -2.8722    1.8443 H   0  0  0  0  0  0
   -0.6198   -0.6111    3.4424 C   0  0  0  0  0  0
   -0.0919    0.2527    3.3136 H   0  0  0  0  0  0
   -1.5433    1.2030   -0.6830 C   0  0  0  0  0  0
   -1.1163    0.6195   -1.4030 H   0  0  0  0  0  0
   -2.8340    2.8106    1.1954 C   0  0  0  0  0  0
   -3.3246    3.3986    1.8736 H   0  0  0  0  0  0
   -1.9724    2.4953   -1.0607 C   0  0  0  0  0  0
   -1.2703   -1.2255    2.3412 C   0  0  0  0  0  0
   -1.6882    0.6945    0.6384 C   0  0  0  0  0  0
   -2.4031    1.5196    1.5567 C   0  0  0  0  0  0
   -1.7720    3.0160   -2.4342 C   0  0  0  0  0  0
   -1.2680    2.2944   -3.0803 H   0  0  0  0  0  0
   -2.7382    3.2557   -2.8821 H   0  0  0  0  0  0
   -1.1641    3.9220   -2.3993 H   0  0  0  0  0  0
    2.0519    1.1482   -1.9782 C   0  0  0  0  0  0
    2.4802    1.7536   -2.7806 H   0  0  0  0  0  0
    1.6530    0.2339   -2.4208 H   0  0  0  0  0  0
    1.2337    1.7145   -1.5358 H   0  0  0  0  0  0
    3.6716    2.0808   -0.2199 C   0  0  0  0  0  0
    2.8814    2.5743    0.3469 H   0  0  0  0  0  0
    4.4830    1.8328    0.4649 H   0  0  0  0  0  0
    4.0579    2.7870   -0.9579 H   0  0  0  0  0  0
    3.3324   -2.3881    1.3768 C   0  0  0  0  0  0
    2.5350   -2.2611    2.1081 H   0  0  0  0  0  0
    2.9671   -3.0156    0.5614 H   0  0  0  0  0  0
    4.1388   -2.9182    1.8882 H   0  0  0  0  0  0
    5.1433   -1.2759    0.0357 C   0  0  0  0  0  0
    5.8426   -1.8747    0.6235 H   0  0  0  0  0  0
    4.9334   -1.8037   -0.8969 H   0  0  0  0  0  0
    5.6537   -0.3395   -0.1913 H   0  0  0  0  0  0
    0.3140   -0.9821    0.3999 C   0  0  0  0  0  0
    0.5932   -1.9975    0.6887 H   0  0  0  0  0  0
    0.2912   -1.0046   -0.6906 H   0  0  0  0  0  0
   -1.1411   -0.6906    0.9358 C   0  0  0  0  0  0
   -1.7751   -1.3235    0.3046 H   0  0  0  0  0  0
    3.1406    0.8005   -0.9246 C   0  0  0  0  0  0
    3.9556    0.4193   -1.5418 H   0  0  0  0  0  0
    3.8199   -1.0141    0.8209 C   0  0  0  0  0  0
    4.0910   -0.3948    1.6823 H   0  0  0  0  0  0
    1.4576   -0.0131    0.8225 C   0  0  0  0  0  0
    1.1097    1.0104    0.6856 H   0  0  0  0  0  0
    1.6462   -0.1067    1.8904 H   0  0  0  0  0  0
    2.7265   -0.2888    0.0449 N   0  0  0  0  0  0
   -2.7518    1.1255    2.8028 O   0  0  0  0  0  0
   -3.2588    1.7180    3.3963 H   0  0  0  0  0  0
  1  2  1  0  0  0
  1  3  2  0  0  0
  1  5  1  0  0  0
  3  4  1  0  0  0
  3  9  1  0  0  0
  5  6  1  0  0  0
  5 11  2  0  0  0
  7  8  1  0  0  0
  7 15  1  0  0  0
  7 17  2  0  0  0
  9 10  1  0  0  0
  9 18  2  0  0  0
 11 12  1  0  0  0
 11 18  1  0  0  0
 13 14  1  0  0  0
 13 17  1  0  0  0
 13 19  2  0  0  0
 15 16  1  0  0  0
 15 20  2  0  0  0
 17 21  1  0  0  0
 18 44  1  0  0  0
 19 20  1  0  0  0
 19 44  1  0  0  0
 20 54  1  0  0  0
 21 22  1  0  0  0
 21 23  1  0  0  0
 21 24  1  0  0  0
 25 26  1  0  0  0
 25 27  1  0  0  0
 25 28  1  0  0  0
 25 46  1  0  0  0
 29 30  1  0  0  0
 29 31  1  0  0  0
 29 32  1  0  0  0
 29 46  1  0  0  0
 33 34  1  0  0  0
 33 35  1  0  0  0
 33 36  1  0  0  0
 33 48  1  0  0  0
 37 38  1  0  0  0
 37 39  1  0  0  0
 37 40  1  0  0  0
 37 48  1  0  0  0
 41 42  1  0  0  0
 41 43  1  0  0  0
 41 44  1  0  0  0
 41 50  1  0  0  0
 44 45  1  0  0  0
 46 47  1  0  0  0
 46 53  1  0  0  0
 48 49  1  0  0  0
 48 53  1  0  0  0
 50 51  1  0  0  0
 50 52  1  0  0  0
 50 53  1  0  0  0
 54 55  1  0  0  0
M  END
$$$$
Molecule-105-Guanabenz
  Cerius2 10300711153D 1   1.00000                          

 22 22  0  0  0  0  0  0  0  0999 V2000
   -6.3980    1.4074   -0.3494 N   0  0  0  0  0  0
   -5.2634    0.7138   -0.4879 C   0  0  0  0  0  0
   -5.3115   -0.4656   -1.1244 N   0  0  0  0  0  0
   -4.1296    1.2314    0.0169 N   0  0  0  0  0  0
   -2.9858    0.6249   -0.0694 N   0  0  0  0  0  0
   -1.8286    1.1077    0.4224 C   0  0  0  0  0  0
   -0.6074    0.4143    0.2856 C   0  0  0  0  0  0
    0.5902    1.1446    0.0330 C   0  0  0  0  0  0
    0.6386    2.8382   -0.1210 Cl  0  0  0  0  0  0
    1.8178    0.4708   -0.1275 C   0  0  0  0  0  0
    1.8784   -0.9273   -0.0391 C   0  0  0  0  0  0
    0.7125   -1.6612    0.2219 C   0  0  0  0  0  0
   -0.5238   -1.0060    0.3940 C   0  0  0  0  0  0
   -1.8425   -2.0117    0.7708 Cl  0  0  0  0  0  0
   -7.2275    1.0557   -0.7049 H   0  0  0  0  0  0
   -6.3913    2.2621    0.1064 H   0  0  0  0  0  0
   -6.1536   -0.7935   -1.4693 H   0  0  0  0  0  0
   -4.1792    2.0905    0.4614 H   0  0  0  0  0  0
   -1.8401    2.0236    0.8791 H   0  0  0  0  0  0
    2.6779    0.9927   -0.3146 H   0  0  0  0  0  0
    2.7716   -1.4107   -0.1618 H   0  0  0  0  0  0
    0.7755   -2.6803    0.2913 H   0  0  0  0  0  0
  1  2  1  0  0  0
  1 15  1  0  0  0
  1 16  1  0  0  0
  2  3  2  0  0  0
  2  4  1  0  0  0
  3 17  1  0  0  0
  4  5  1  0  0  0
  4 18  1  0  0  0
  5  6  2  0  0  0
  6  7  1  0  0  0
  6 19  1  0  0  0
  7  8  2  0  0  0
  8  9  1  0  0  0
  8 10  1  0  0  0
 10 11  2  0  0  0
 10 20  1  0  0  0
 11 12  1  0  0  0
 11 21  1  0  0  0
 12 13  2  0  0  0
 12 22  1  0  0  0
 13  7  1  0  0  0
 13 14  1  0  0  0
M  END
$$$$
Molecule-106-Mefloquine
  Cerius2 10300711153D 1   1.00000                          

 42 44  0  0  0  0  0  0  0  0999 V2000
    7.5265   -2.2025   -0.1044 C   0  0  0  0  0  0
    7.4876   -3.5991   -0.0150 C   0  0  0  0  0  0
    8.6815   -4.3313    0.0287 C   0  0  0  0  0  0
    8.7554   -1.5014   -0.1449 C   0  0  0  0  0  0
    9.9572   -2.2635   -0.0913 C   0  0  0  0  0  0
    9.9475   -3.6913   -0.0166 C   0  0  0  0  0  0
   11.1910   -4.4056    0.0084 C   0  0  0  0  0  0
   12.3885   -3.6433   -0.0041 C   0  0  0  0  0  0
   12.3660   -2.2364   -0.0671 C   0  0  0  0  0  0
   11.1555   -1.6332   -0.1108 N   0  0  0  0  0  0
   13.5823   -1.3802   -0.0911 C   0  0  0  0  0  0
   13.5734   -0.5260    0.9849 F   0  0  0  0  0  0
   13.6044   -0.6316   -1.2428 F   0  0  0  0  0  0
   14.7656   -2.0799   -0.0406 F   0  0  0  0  0  0
    8.6908   -0.0077   -0.2461 C   0  0  0  0  0  0
    9.8856    0.6689   -0.2777 F   0  0  0  0  0  0
    7.9975    0.5022    0.8260 F   0  0  0  0  0  0
    8.0270    0.3471   -1.3963 F   0  0  0  0  0  0
   11.2259   -5.9143    0.0384 C   0  0  0  0  0  0
   10.5793   -6.3718   -1.1553 O   0  0  0  0  0  0
   12.5994   -6.6575    0.1739 C   0  0  0  0  0  0
   12.4445   -8.1797    0.4793 C   0  0  0  0  0  0
   13.8244   -8.8807    0.6594 C   0  0  0  0  0  0
   14.9834   -8.2134   -0.1378 C   0  0  0  0  0  0
   14.4623   -7.4527   -1.3811 C   0  0  0  0  0  0
   13.4358   -6.4327   -1.0438 N   0  0  0  0  0  0
    6.6376   -1.6958   -0.1398 H   0  0  0  0  0  0
    6.5871   -4.0844    0.0167 H   0  0  0  0  0  0
    8.5964   -5.3459    0.0941 H   0  0  0  0  0  0
   13.2966   -4.1007    0.0288 H   0  0  0  0  0  0
   10.6256   -6.2204    0.9001 H   0  0  0  0  0  0
   13.1282   -6.2275    1.0304 H   0  0  0  0  0  0
   11.8455   -8.3274    1.3823 H   0  0  0  0  0  0
   11.9169   -8.6563   -0.3512 H   0  0  0  0  0  0
   14.0913   -8.8841    1.7202 H   0  0  0  0  0  0
   13.7270   -9.9251    0.3489 H   0  0  0  0  0  0
   15.5014   -7.4978    0.5074 H   0  0  0  0  0  0
   15.7101   -8.9703   -0.4447 H   0  0  0  0  0  0
   15.2936   -6.9532   -1.8830 H   0  0  0  0  0  0
   14.0278   -8.1685   -2.0836 H   0  0  0  0  0  0
   10.4536   -7.3359   -1.0408 H   0  0  0  0  0  0
   12.7976   -6.3759   -1.8417 H   0  0  0  0  0  0
  1  2  2  0  0  0
  1 27  1  0  0  0
  2  3  1  0  0  0
  2 28  1  0  0  0
  3  6  2  0  0  0
  3 29  1  0  0  0
  4  1  1  0  0  0
  4 15  1  0  0  0
  5  4  2  0  0  0
  5  6  1  0  0  0
  6  7  1  0  0  0
  7  8  2  0  0  0
  7 19  1  0  0  0
  8  9  1  0  0  0
  8 30  1  0  0  0
  9 10  2  0  0  0
  9 11  1  0  0  0
 10  5  1  0  0  0
 11 12  1  0  0  0
 11 13  1  0  0  0
 11 14  1  0  0  0
 15 16  1  0  0  0
 15 17  1  0  0  0
 15 18  1  0  0  0
 19 20  1  0  0  0
 19 21  1  0  0  0
 19 31  1  0  0  0
 20 41  1  0  0  0
 21 22  1  0  0  0
 21 26  1  0  0  0
 21 32  1  0  0  0
 22 23  1  0  0  0
 22 33  1  0  0  0
 22 34  1  0  0  0
 23 24  1  0  0  0
 23 35  1  0  0  0
 23 36  1  0  0  0
 24 25  1  0  0  0
 24 37  1  0  0  0
 24 38  1  0  0  0
 25 26  1  0  0  0
 25 39  1  0  0  0
 25 40  1  0  0  0
 26 42  1  0  0  0
M  END
$$$$
Molecule-107_Urapidil
  Cerius2 10300711153D 1   1.00000                          
Structure written by Cerius2 SD Exporter
 57 59  0  0  0  0  0  0  0  0999 V2000
   -6.9998    0.4733    0.9429 C   0  0  0  0  0  0
   -7.5581    0.8914    1.6909 H   0  0  0  0  0  0
   -7.5859   -0.4468    0.0588 C   0  0  0  0  0  0
   -8.5718   -0.6978    0.1622 H   0  0  0  0  0  0
   -5.6442    0.8161    0.7999 C   0  0  0  0  0  0
   -5.2283    1.4799    1.4572 H   0  0  0  0  0  0
   -6.8164   -1.0223   -0.9676 C   0  0  0  0  0  0
   -7.2612   -1.6888   -1.6000 H   0  0  0  0  0  0
   -4.8594    0.2467   -0.2297 C   0  0  0  0  0  0
   -5.4515   -0.6848   -1.1249 C   0  0  0  0  0  0
    4.5418   -0.2510   -0.7448 C   0  0  0  0  0  0
    3.8443    0.1215   -1.3913 H   0  0  0  0  0  0
    4.4214   -0.0756    0.6485 C   0  0  0  0  0  0
    5.6424   -0.9496   -1.2531 C   0  0  0  0  0  0
    6.4607   -1.2799    0.9356 C   0  0  0  0  0  0
    1.2570    1.8055    1.5038 C   0  0  0  0  0  0
    0.9352    1.0475    2.2221 H   0  0  0  0  0  0
    1.7776    2.5866    2.0653 H   0  0  0  0  0  0
    2.2470    1.1730    0.4937 C   0  0  0  0  0  0
    1.7361    0.3923   -0.0757 H   0  0  0  0  0  0
    2.5975    1.9447   -0.1970 H   0  0  0  0  0  0
    0.0121    2.4378    0.8241 C   0  0  0  0  0  0
   -0.6377    2.8692    1.5915 H   0  0  0  0  0  0
    0.3767    3.2648    0.2076 H   0  0  0  0  0  0
   -1.6831    2.1113   -1.0408 C   0  0  0  0  0  0
   -1.4940    1.6022   -1.9892 H   0  0  0  0  0  0
   -1.4641    3.1698   -1.2054 H   0  0  0  0  0  0
   -1.3486    0.2999    0.7091 C   0  0  0  0  0  0
   -1.7287    0.6056    1.6890 H   0  0  0  0  0  0
   -0.5613   -0.4405    0.8664 H   0  0  0  0  0  0
   -3.1904    1.9537   -0.7038 C   0  0  0  0  0  0
   -3.4218    2.6241    0.1280 H   0  0  0  0  0  0
   -3.7754    2.2744   -1.5718 H   0  0  0  0  0  0
   -2.5148   -0.3762   -0.0539 C   0  0  0  0  0  0
   -2.1362   -0.7790   -0.9972 H   0  0  0  0  0  0
   -2.8900   -1.2156    0.5414 H   0  0  0  0  0  0
    5.2748   -0.4201    2.9200 C   0  0  0  0  0  0
    6.0834   -0.8668    3.5010 H   0  0  0  0  0  0
    5.2652    0.6449    3.1640 H   0  0  0  0  0  0
    4.3464   -0.8729    3.2761 H   0  0  0  0  0  0
    7.7424   -2.1894   -0.9450 C   0  0  0  0  0  0
    7.7545   -3.2043   -0.5402 H   0  0  0  0  0  0
    7.7549   -2.2774   -2.0333 H   0  0  0  0  0  0
    8.6672   -1.6864   -0.6523 H   0  0  0  0  0  0
   -5.0302   -2.1606   -3.1379 C   0  0  0  0  0  0
   -5.3614   -3.0994   -2.6910 H   0  0  0  0  0  0
   -5.8204   -1.7560   -3.7724 H   0  0  0  0  0  0
   -4.1516   -2.3555   -3.7530 H   0  0  0  0  0  0
    3.3629    0.6000    1.1809 N   0  0  0  0  0  0
    3.3619    0.7057    2.1436 H   0  0  0  0  0  0
   -3.5457    0.5976   -0.3374 N   0  0  0  0  0  0
    5.3915   -0.5968    1.4786 N   0  0  0  0  0  0
    6.5985   -1.4629   -0.4203 N   0  0  0  0  0  0
   -0.7764    1.4837   -0.0200 N   0  0  0  0  0  0
    5.6969   -1.0741   -2.4999 O   0  0  0  0  0  0
    7.3461   -1.7568    1.6894 O   0  0  0  0  0  0
   -4.6793   -1.2191   -2.1178 O   0  0  0  0  0  0
  1  2  1  0  0  0
  1  3  1  0  0  0
  1  5  2  0  0  0
  3  4  1  0  0  0
  3  7  2  0  0  0
  5  6  1  0  0  0
  5  9  1  0  0  0
  7  8  1  0  0  0
  7 10  1  0  0  0
  9 10  2  0  0  0
  9 51  1  0  0  0
 10 57  1  0  0  0
 11 12  1  0  0  0
 11 13  2  0  0  0
 11 14  1  0  0  0
 13 49  1  0  0  0
 13 52  1  0  0  0
 14 53  1  0  0  0
 14 55  2  0  0  0
 15 52  1  0  0  0
 15 53  1  0  0  0
 15 56  2  0  0  0
 16 17  1  0  0  0
 16 18  1  0  0  0
 16 19  1  0  0  0
 16 22  1  0  0  0
 19 20  1  0  0  0
 19 21  1  0  0  0
 19 49  1  0  0  0
 22 23  1  0  0  0
 22 24  1  0  0  0
 22 54  1  0  0  0
 25 26  1  0  0  0
 25 27  1  0  0  0
 25 31  1  0  0  0
 25 54  1  0  0  0
 28 29  1  0  0  0
 28 30  1  0  0  0
 28 34  1  0  0  0
 28 54  1  0  0  0
 31 32  1  0  0  0
 31 33  1  0  0  0
 31 51  1  0  0  0
 34 35  1  0  0  0
 34 36  1  0  0  0
 34 51  1  0  0  0
 37 38  1  0  0  0
 37 39  1  0  0  0
 37 40  1  0  0  0
 37 52  1  0  0  0
 41 42  1  0  0  0
 41 43  1  0  0  0
 41 44  1  0  0  0
 41 53  1  0  0  0
 45 46  1  0  0  0
 45 47  1  0  0  0
 45 48  1  0  0  0
 45 57  1  0  0  0
 49 50  1  0  0  0
M  END
$$$$
Molecule-108-Zatebradin
  Cerius2 10300711153D 1   1.00000                          
Structure written by Cerius2 SD Exporter
 69 71  0  0  0  0  0  0  0  0999 V2000
    3.0147    1.0234   -1.1700 C   0  0  0  0  0  0
    2.1146    1.1418   -1.6420 H   0  0  0  0  0  0
    3.6813    2.1621   -0.6871 C   0  0  0  0  0  0
    3.2490    3.0772   -0.8240 H   0  0  0  0  0  0
    4.8196   -0.3728   -0.3480 C   0  0  0  0  0  0
    5.2463   -1.2950   -0.2247 H   0  0  0  0  0  0
   -4.9071    0.8433    1.4667 C   0  0  0  0  0  0
   -5.5786    0.3352    2.0483 H   0  0  0  0  0  0
   -3.1016    2.2525   -0.1325 C   0  0  0  0  0  0
   -2.4424    2.7680   -0.7175 H   0  0  0  0  0  0
    3.5723   -0.2628   -1.0020 C   0  0  0  0  0  0
   -3.5969    0.3399    1.3029 C   0  0  0  0  0  0
   -2.6832    1.0530    0.4878 C   0  0  0  0  0  0
    4.9237    2.0488   -0.0226 C   0  0  0  0  0  0
    5.4983    0.7599    0.1452 C   0  0  0  0  0  0
   -5.3260    2.0333    0.8428 C   0  0  0  0  0  0
   -4.4125    2.7535    0.0308 C   0  0  0  0  0  0
   -2.9182   -2.0132    1.0059 C   0  0  0  0  0  0
   -3.1827   -0.9208    1.9755 C   0  0  0  0  0  0
   -2.2857   -0.7532    2.5723 H   0  0  0  0  0  0
   -3.9482   -1.2359    2.6925 H   0  0  0  0  0  0
    2.8650   -1.4794   -1.4911 C   0  0  0  0  0  0
    1.9970   -1.1981   -2.0939 H   0  0  0  0  0  0
    3.5426   -2.0316   -2.1463 H   0  0  0  0  0  0
   -1.3046    0.5342    0.2811 C   0  0  0  0  0  0
   -0.6989    1.2536   -0.2786 H   0  0  0  0  0  0
   -0.8004    0.4056    1.2410 H   0  0  0  0  0  0
   -0.9890   -4.2914   -0.0767 C   0  0  0  0  0  0
   -0.9236   -5.1750   -0.7142 H   0  0  0  0  0  0
   -1.5363   -4.5996    0.8170 H   0  0  0  0  0  0
   -1.2944   -0.8013   -0.5070 C   0  0  0  0  0  0
   -1.6466   -0.5698   -1.5178 H   0  0  0  0  0  0
   -0.2416   -1.0716   -0.5991 H   0  0  0  0  0  0
    2.3753   -2.4013   -0.3374 C   0  0  0  0  0  0
    3.2197   -2.9528    0.0875 H   0  0  0  0  0  0
    1.9918   -1.7462    0.4508 H   0  0  0  0  0  0
   -1.8054   -3.1982   -0.8271 C   0  0  0  0  0  0
   -1.2912   -2.9943   -1.7723 H   0  0  0  0  0  0
   -2.7694   -3.6261   -1.1204 H   0  0  0  0  0  0
    0.4392   -3.8590    0.3559 C   0  0  0  0  0  0
    0.3016   -3.0859    1.1171 H   0  0  0  0  0  0
    0.9333   -4.6994    0.8534 H   0  0  0  0  0  0
    1.7891   -4.4347   -1.6777 C   0  0  0  0  0  0
    0.9645   -5.0351   -2.0606 H   0  0  0  0  0  0
    2.2945   -4.0171   -2.5484 H   0  0  0  0  0  0
    2.4854   -5.0949   -1.1550 H   0  0  0  0  0  0
    5.2127    4.5302    0.4097 C   0  0  0  0  0  0
    4.2681    4.6933    0.9313 H   0  0  0  0  0  0
    5.9899    5.1156    0.9014 H   0  0  0  0  0  0
    5.1244    4.8639   -0.6255 H   0  0  0  0  0  0
    7.6322    1.3611    1.3765 C   0  0  0  0  0  0
    8.0189    2.0761    0.6486 H   0  0  0  0  0  0
    7.1690    1.8941    2.2082 H   0  0  0  0  0  0
    8.4628    0.7686    1.7600 H   0  0  0  0  0  0
   -7.3852    3.4992    0.6404 C   0  0  0  0  0  0
   -8.3895    3.4331    1.0584 H   0  0  0  0  0  0
   -6.9259    4.4303    0.9751 H   0  0  0  0  0  0
   -7.4573    3.4926   -0.4483 H   0  0  0  0  0  0
   -4.1002    4.7965   -1.4383 C   0  0  0  0  0  0
   -3.2362    5.2149   -0.9195 H   0  0  0  0  0  0
   -3.7719    4.2704   -2.3363 H   0  0  0  0  0  0
   -4.7617    5.6118   -1.7316 H   0  0  0  0  0  0
   -2.0324   -1.9774   -0.0511 N   0  0  0  0  0  0
    1.2950   -3.3515   -0.7716 N   0  0  0  0  0  0
   -3.5937   -3.0517    1.2149 O   0  0  0  0  0  0
    5.5778    3.1461    0.4585 O   0  0  0  0  0  0
    6.6865    0.4829    0.7595 O   0  0  0  0  0  0
   -6.6230    2.3784    1.0967 O   0  0  0  0  0  0
   -4.8187    3.9079   -0.5752 O   0  0  0  0  0  0
  1  2  1  0  0  0
  1  3  1  0  0  0
  1 11  2  0  0  0
  3  4  1  0  0  0
  3 14  2  0  0  0
  5  6  1  0  0  0
  5 11  1  0  0  0
  5 15  2  0  0  0
  7  8  1  0  0  0
  7 12  1  0  0  0
  7 16  2  0  0  0
  9 10  1  0  0  0
  9 13  1  0  0  0
  9 17  2  0  0  0
 11 22  1  0  0  0
 12 13  2  0  0  0
 12 19  1  0  0  0
 13 25  1  0  0  0
 14 15  1  0  0  0
 14 66  1  0  0  0
 15 67  1  0  0  0
 16 17  1  0  0  0
 16 68  1  0  0  0
 17 69  1  0  0  0
 18 19  1  0  0  0
 18 63  1  0  0  0
 18 65  2  0  0  0
 19 20  1  0  0  0
 19 21  1  0  0  0
 22 23  1  0  0  0
 22 24  1  0  0  0
 22 34  1  0  0  0
 25 26  1  0  0  0
 25 27  1  0  0  0
 25 31  1  0  0  0
 28 29  1  0  0  0
 28 30  1  0  0  0
 28 37  1  0  0  0
 28 40  1  0  0  0
 31 32  1  0  0  0
 31 33  1  0  0  0
 31 63  1  0  0  0
 34 35  1  0  0  0
 34 36  1  0  0  0
 34 64  1  0  0  0
 37 38  1  0  0  0
 37 39  1  0  0  0
 37 63  1  0  0  0
 40 41  1  0  0  0
 40 42  1  0  0  0
 40 64  1  0  0  0
 43 44  1  0  0  0
 43 45  1  0  0  0
 43 46  1  0  0  0
 43 64  1  0  0  0
 47 48  1  0  0  0
 47 49  1  0  0  0
 47 50  1  0  0  0
 47 66  1  0  0  0
 51 52  1  0  0  0
 51 53  1  0  0  0
 51 54  1  0  0  0
 51 67  1  0  0  0
 55 56  1  0  0  0
 55 57  1  0  0  0
 55 58  1  0  0  0
 55 68  1  0  0  0
 59 60  1  0  0  0
 59 61  1  0  0  0
 59 62  1  0  0  0
 59 69  1  0  0  0
M  END
$$$$
Molecule-109-Acetohexamide
  Cerius2 10300711153D 1   1.00000                          

 42 43  0  0  0  0  0  0  0  0999 V2000
   -1.9132    1.9857   -1.9188 C   0  0  0  0  0  0
   -0.6553    2.3841   -1.4294 C   0  0  0  0  0  0
   -0.4984    3.6289   -0.7857 C   0  0  0  0  0  0
   -1.6260    4.4623   -0.6366 C   0  0  0  0  0  0
   -2.8812    4.0599   -1.1282 C   0  0  0  0  0  0
   -3.0593    2.8128   -1.7827 C   0  0  0  0  0  0
    1.0620    4.1199   -0.1717 S   0  0  0  0  0  0
   -4.3361    2.4273   -2.2720 C   0  0  0  0  0  0
   -5.3203    3.1960   -2.1439 O   0  0  0  0  0  0
   -4.6127    1.1389   -2.9481 C   0  0  0  0  0  0
    1.2102    3.5755    1.4081 N   0  0  0  0  0  0
    2.2360    3.5615   -1.0931 O   0  0  0  0  0  0
    1.1564    5.7052   -0.1116 O   0  0  0  0  0  0
    1.6824    2.3750    1.7748 C   0  0  0  0  0  0
    2.2050    1.4931    0.8948 N   0  0  0  0  0  0
    1.6074    2.1219    2.9959 O   0  0  0  0  0  0
    2.6760    0.1674    1.1769 C   0  0  0  0  0  0
    1.8427   -0.8633    0.3666 C   0  0  0  0  0  0
    2.2906   -2.3339    0.6328 C   0  0  0  0  0  0
    3.7800   -2.4863    1.0643 C   0  0  0  0  0  0
    4.6786   -1.3769    0.4623 C   0  0  0  0  0  0
    4.1983    0.0581    0.8415 C   0  0  0  0  0  0
   -1.9728    1.0749   -2.3789 H   0  0  0  0  0  0
    0.1446    1.7560   -1.5486 H   0  0  0  0  0  0
   -1.5451    5.3700   -0.1696 H   0  0  0  0  0  0
   -3.6710    4.6985   -0.9990 H   0  0  0  0  0  0
   -5.6650    1.0527   -3.2299 H   0  0  0  0  0  0
   -4.0128    1.0585   -3.8560 H   0  0  0  0  0  0
   -4.3729    0.3102   -2.2801 H   0  0  0  0  0  0
    2.5448   -0.0756    2.2381 H   0  0  0  0  0  0
    1.9526   -0.6434   -0.7000 H   0  0  0  0  0  0
    0.7826   -0.7582    0.6151 H   0  0  0  0  0  0
    1.6605   -2.7661    1.4155 H   0  0  0  0  0  0
    2.1191   -2.9177   -0.2762 H   0  0  0  0  0  0
    3.8482   -2.4327    2.1549 H   0  0  0  0  0  0
    4.1536   -3.4690    0.7607 H   0  0  0  0  0  0
    5.7095   -1.5202    0.7974 H   0  0  0  0  0  0
    4.6710   -1.4837   -0.6267 H   0  0  0  0  0  0
    4.4485    0.7253    0.0108 H   0  0  0  0  0  0
    4.7640    0.4065    1.7106 H   0  0  0  0  0  0
    0.9043    4.1712    2.1054 H   0  0  0  0  0  0
    2.2841    1.8014   -0.0163 H   0  0  0  0  0  0
  1  2  2  0  0  0
  1 23  1  0  0  0
  2  3  1  0  0  0
  2 24  1  0  0  0
  3  4  2  0  0  0
  3  7  1  0  0  0
  4  5  1  0  0  0
  4 25  1  0  0  0
  5  6  2  0  0  0
  5 26  1  0  0  0
  6  1  1  0  0  0
  6  8  1  0  0  0
  7 11  1  0  0  0
  7 12  2  0  0  0
  7 13  2  0  0  0
  8  9  2  0  0  0
  8 10  1  0  0  0
 10 27  1  0  0  0
 10 28  1  0  0  0
 10 29  1  0  0  0
 11 14  1  0  0  0
 11 41  1  0  0  0
 14 15  1  0  0  0
 14 16  2  0  0  0
 15 17  1  0  0  0
 15 42  1  0  0  0
 17 18  1  0  0  0
 17 22  1  0  0  0
 17 30  1  0  0  0
 18 19  1  0  0  0
 18 31  1  0  0  0
 18 32  1  0  0  0
 19 20  1  0  0  0
 19 33  1  0  0  0
 19 34  1  0  0  0
 20 21  1  0  0  0
 20 35  1  0  0  0
 20 36  1  0  0  0
 21 22  1  0  0  0
 21 37  1  0  0  0
 21 38  1  0  0  0
 22 39  1  0  0  0
 22 40  1  0  0  0
M  END
$$$$
Molecule-110-Allopurinol
  Cerius2 10300711153D 1   1.00000                          
Structure written by Cerius2 SD Exporter
 14 15  0  0  0  0  0  0  0  0999 V2000
    0.3561    0.6061    0.0002 C   0  0  0  0  0  0
    0.7010   -0.7341    0.0138 C   0  0  0  0  0  0
    1.5496    1.3086    0.0088 C   0  0  0  0  0  0
    1.6567    2.3240    0.0028 H   0  0  0  0  0  0
   -1.5571   -1.3584   -0.0075 C   0  0  0  0  0  0
   -2.2757   -2.0837   -0.0105 H   0  0  0  0  0  0
   -1.0002    0.9613   -0.0178 C   0  0  0  0  0  0
    2.0387   -0.7951    0.0295 N   0  0  0  0  0  0
    2.5519   -1.6188    0.0413 H   0  0  0  0  0  0
   -1.9205   -0.0422   -0.0211 N   0  0  0  0  0  0
    2.5490    0.4032    0.0267 N   0  0  0  0  0  0
   -0.2399   -1.7093    0.0100 N   0  0  0  0  0  0
   -1.4008    2.2498   -0.0316 O   0  0  0  0  0  0
   -2.3588    2.4562   -0.0440 H   0  0  0  0  0  0
  1  2  2  0  0  0
  1  3  1  0  0  0
  1  7  1  0  0  0
  2  8  1  0  0  0
  2 12  1  0  0  0
  3  4  1  0  0  0
  3 11  2  0  0  0
  5  6  1  0  0  0
  5 10  1  0  0  0
  5 12  2  0  0  0
  7 10  2  0  0  0
  7 13  1  0  0  0
  8  9  1  0  0  0
  8 11  1  0  0  0
 13 14  1  0  0  0
M  END
$$$$
Molecule-111-Carvedilol
  Cerius2 10300711153D 1   1.00000                          
Structure written by Cerius2 SD Exporter
 56 59  0  0  0  0  0  0  0  0999 V2000
   -3.4112    1.1307   -0.0890 C   0  0  0  0  0  0
   -4.2569    0.3366    0.6988 C   0  0  0  0  0  0
   -3.4800    2.4305    0.4294 C   0  0  0  0  0  0
   -4.7969    1.2139    1.6517 C   0  0  0  0  0  0
   -2.5879    0.8655   -1.2033 C   0  0  0  0  0  0
   -2.5253   -0.0642   -1.6094 H   0  0  0  0  0  0
   -2.7415    3.4890   -0.1246 C   0  0  0  0  0  0
   -2.8052    4.4300    0.2686 H   0  0  0  0  0  0
   -5.7022    0.7777    2.6287 C   0  0  0  0  0  0
   -6.0832    1.4314    3.3147 H   0  0  0  0  0  0
   -1.8355    1.9175   -1.7682 C   0  0  0  0  0  0
   -1.2309    1.7340   -2.5723 H   0  0  0  0  0  0
   -1.9117    3.2217   -1.2324 C   0  0  0  0  0  0
   -1.3635    3.9770   -1.6503 H   0  0  0  0  0  0
   -6.0705   -0.5794    2.6413 C   0  0  0  0  0  0
   -6.7291   -0.9196    3.3455 H   0  0  0  0  0  0
    6.1758    3.0309   -1.2043 C   0  0  0  0  0  0
[truncated: 1,396,104 more chars]
